# Supplementary material for: A remarkable adaptive paradigm of heart performance and protection emerges in response to marked cardiac-specific overexpression of ADCY8
Source: eLife. 2022 Dec 14;11:e80949. doi: 10.7554/eLife.80949 (PMC9822292; doi:10.7554/eLife.80949)
Supplement: Supplementary file 1. — (a) List of Echo parameters recorded in TGAC8 heart vs WT. (b) A Listing of all 11810 identified transcripts. (c) A listing of 2323 transcripts that significantly differed in expression by genotype. (d) A listing of all 6834 identified proteins. (e) A listing of 2184 proteins that significantly differed in expression by genotype. (f) A listing of canonical pathways in IPA analysis of the total number of transcripts. (g) A listing of canonical pathways in IPA analysis of the total number of proteins that were differentially enriched or activated in TGAC8 vs WT. (h) A listing of molecules with indication of involvement in number of pathways. (i) A listing of 544 molecules of which both transcripts and proteins differed by genotype. (j) A listing of canonical pathways that were differentially enriched by genotype in IPA analysis of 544 transcripts and proteins. (k) A Complete list of downstream effects of enriched canonical signaling pathways in TGAC8, depicted on Figure 10. (l) RT-qPCR analysis of selected transcripts related to G-protein Coupled Receptor Signaling, that differed by genotype in RNASEQ. (m) Transcripts and proteins involved in Cell Cycle/Cell Proliferation, and Growth and Developmental Circuits that differed between TGAC8 vs WT. (n) IPA representation of top cardiovascular disease-related functions within the LV transcriptome of TGAC8 and WT. (o) IPA representation of top cardiovascular disease-related functions within the LV proteome of TGAC8 and WT. (p) Primers used in RT-qPCR analyses. (q) Antibodies used in WB analyses, antibody arrays and immunostaining. [file elife-80949-supp1.xlsx]

## Sheet: a
	Echo Parameters and body weight of TGAC8 and WT mice
	WT (n=21)	TGAC8 (n=28)
BW (g)	27±1	28±1
IVS (mm)	0.66±0.03	0.79±0.03*
PW (mm)	0.68±0.03	0.76±0.02*
LVM (mg)	91±3	86±3
LVM/BW (mg/g)	3.43±0.12	3.14±0.12
HR (beats/min)	464±10	570±13*
AoD (mm)	1.57±0.03	1.66±0.03*
LAD (mm)	1.87±0.07	1.87±0.07
LAD/AoD	1.19±0.04	1.13±0.05
EDV (uL)	79±3	59±3*
ESV (uL)	46±2	22±2*
SV (uL)	33±1	37±2
EF (%)	42±2	64±2*
CO (mL/min)	15±1	21±1*
CI (mL/kg/min)	566±25	751±29*
E (cm/s)	783±40	970±43*
A (cm/s)	436±24	462±30
E/A	1.87±0.12	2.43±0.23
Mean±SEM; * p<0.05 vs WT; BW = bodyweight; IVS = intraventricular septum; PW = LV posterior wall;
LVM = LV mass; HR = heart rate; AoD = aortic lumen dimension; LAD = left atrium demension;
EDV = LV end-diastolic volume; ESV = LV end-systolic volume; SV = LV stroke volume; EF = LV ejection
fraction; CO = cardiac output; CI = cardiac index; E = mitral flow e wave; A = mitral flow A wave.

## Sheet: b
A Listing of all identified transcripts.
gene	locus	sample_1	sample_2	status	TGLV1	TGLV2	TGLV3	TGLV4	TGLV5	TGLV6	TGLV7	TGLV8	WTLV1	WTLV2	WTLV3	WTLV4	WTLV5	WTLV6	WTLV7	WTLV8	value_1	value_2	log2(fold_change)	test_stat	p_value	q_value	significant
ADCY8HS	ADCY8_Homo_sapiens_mRNA:0-4146	WTLV	TGLV	OK	520.417	566.921	602.439	518.245	480.695	411.473	446.801	480.529	0	0.345155	0	0	0	0	0	0	0.169181	768.896	12.15	17.174	5e-05	0.000553274	yes
Gm38717	chr1:4115672-4243365	WTLV	TGLV	OK	3.04266	1.90477	1.68372	1.76664	2.49892	2.22853	1.86852	2.4624	0.485392	0.439283	0.32277	0.328188	0.196974	0.312983	0.262515	0.338835	0.562362	2.9761	2.40385	4.11794	5e-05	0.000553274	yes
Sox17	chr1:4490927-4497386	WTLV	TGLV	OK	0.795147	0.678879	0.822615	1.03435	0.951713	1.31592	1.14653	1.1683	0.708311	0.696127	0.612382	0.635854	0.700675	0.570137	0.982661	0.828319	0.958925	1.18732	0.308224	0.699917	0.03495	0.129844	no
Mrpl15	chr1:4773197-4785749	WTLV	TGLV	OK	11.7323	10.5839	9.68856	9.65738	11.5395	9.63183	10.755	9.20061	9.77085	10.1234	11.0477	9.97278	11.3884	11.5537	10.3924	10.9783	13.8995	12.4165	-0.162777	-0.697509	0.04725	0.160933	no
Lypla1	chr1:4807559-4846739	WTLV	TGLV	OK	13.6921	11.0685	10.9268	10.0329	12.2574	9.88442	10.9669	11.4615	11.0425	9.04089	10.6823	11.2971	11.9024	11.2352	10.6708	9.91415	14.7537	14.4737	-0.0276429	-0.131527	0.7091	0.859949	no
Tcea1	chr1:4857693-4897909	WTLV	TGLV	OK	6.64104	4.44825	4.27292	4.44762	5.62236	4.72425	4.01647	5.24893	4.35733	4.66313	4.65653	4.37851	5.26674	4.64231	5.32582	3.93694	12.4858	12.464	-0.00251881	-0.0121797	0.97105	0.987291	no
Atp6v1h	chr1:5082977-5163213	WTLV	TGLV	OK	7.38892	3.97288	5.24327	5.22317	6.29844	4.43328	5.97889	7.38904	4.20152	3.38718	4.23994	4.00331	3.62269	4.64925	4.05749	4.1989	6.15051	7.45964	0.278401	1.04201	0.00265	0.0174829	yes
Rb1cc1	chr1:6209862-6276374	WTLV	TGLV	OK	14.3742	13.0846	11.7272	12.3038	12.108	13.1159	12.6574	12.4118	11.2906	11.9436	12.0419	11.7971	12.5183	13.1508	10.8714	11.4966	17.5875	17.2122	-0.0311145	-0.18604	0.5967	0.789989	no
Gm37108	chr1:6916525-6923642	WTLV	TGLV	OK	10.6643	8.86691	9.9437	9.2437	11.6144	10.8316	10.3777	11.8465	10.4459	9.74591	9.25189	10.2466	10.0125	9.76646	10.0808	10.2214	0.960372	1.15505	0.266287	0.273374	0.44475	0.6818	no
Pcmtd1	chr1:7088891-7173628	WTLV	TGLV	OK	13.146	11.892	11.756	11.6821	12.5698	13.1361	13.8091	12.5214	12.5626	12.0188	12.25	12.9138	13.1623	12.278	11.4879	11.4541	17.5859	16.6599	-0.078033	-0.456374	0.19525	0.422464	no
Rrs1	chr1:9545407-9547455	WTLV	TGLV	OK	5.16536	5.35378	4.41512	4.19199	4.60348	5.0241	4.68872	4.93569	4.00298	5.19708	4.53612	4.64993	4.35574	4.33574	5.2121	4.09325	5.95261	5.74228	-0.0518982	-0.1869	0.5977	0.790672	no
Adhfe1	chr1:9547934-9631092	WTLV	TGLV	OK	8.17289	6.90009	5.95274	6.13117	8.0437	7.08072	6.45578	8.19863	9.03603	9.34533	6.21666	9.07621	10.6401	8.04019	11.1115	8.95163	12.0635	8.77296	-0.459516	-1.91223	5e-05	0.000553274	yes
Vcpip1	chr1:9718621-9771256	WTLV	TGLV	OK	1.97915	1.82458	1.87258	1.73049	2.42457	1.96652	2.24055	1.87877	1.75038	1.87565	1.96311	1.56962	1.88569	2.09188	2.0241	1.93906	2.21474	2.146	-0.0454924	-0.19083	0.59035	0.786136	no
1700034P13Rik	chr1:9718621-9771256	WTLV	TGLV	OK	0.503925	0.0976136	4.73e-07	0.459238	0.561748	0.273943	0.262122	0.338984	0.174001	0.341568	0.147595	0.396623	0.884433	0.146966	9.59e-07	0.365951	1.97315	1.99557	0.0163014	0.0210296	0.9544	0.97983	no
Sgk3	chr1:9798129-9902570	WTLV	TGLV	OK	1.33619	1.16296	1.11493	1.48775	1.04539	1.39978	1.33899	1.15654	1.26251	1.34183	1.18311	1.0542	0.768871	0.785604	1.29689	1.65778	1.72326	1.77645	0.0438558	0.149526	0.6713	0.837815	no
Snhg6	chr1:9906156-9944118	WTLV	TGLV	OK	12.0907	4.70751	7.40488	8.62571	9.81933	8.20341	6.67289	10.6517	13.1802	10.2209	8.66945	9.16336	12.4991	14.559	9.77292	12.614	14.721	11.3482	-0.375405	-0.528287	0.1307	0.325621	no
Snord87	chr1:9906156-9944118	WTLV	TGLV	OK	7586.98	8421.93	9816.98	8513.39	11686.4	7005.35	9416.96	7077.44	9905.41	10365.1	11984.3	11813.4	11137.9	14770.1	12388.5	17113.6	15982.9	10337.6	-0.62863	-1.90146	5e-05	0.000553274	yes
Cops5	chr1:10024599-10136771	WTLV	TGLV	OK	12.6575	12.5454	11.0944	14.0257	13.8186	12.5134	15.6798	13.619	10.054	12.5039	13.4008	12.5465	14.4059	13.1488	14.0721	14.277	17.2744	16.2467	-0.08849	-0.378846	0.2811	0.524138	no
Cspp1	chr1:10024599-10136771	WTLV	TGLV	OK	0.981715	1.30955	1.10044	1.03205	1.00262	0.898843	1.48409	1.09083	0.490432	0.717104	0.951172	0.93982	1.13101	1.32691	1.44113	0.869448	1.57614	1.71697	0.123467	0.215019	0.5204	0.740504	no
Arfgef1	chr1:10137506-10232670	WTLV	TGLV	OK	15.8598	12.4984	13.8337	14.2169	13.6976	13.6457	14.1364	14.8572	14.2422	14.3866	15.7982	16.2362	16.5426	15.6186	16.0552	14.9259	20.4858	17.4414	-0.23211	-1.43484	5e-05	0.000553274	yes
Prex2	chr1:10993271-11303683	WTLV	TGLV	OK	2.74287	3.88491	2.74051	3.60761	3.37442	3.0426	3.63235	3.21493	3.12376	2.94993	3.0769	3.63731	2.9692	3.31109	3.25587	3.29472	4.5371	4.3519	-0.0601231	-0.320679	0.36155	0.6056	no
Gm17644	chr1:12667562-12673090	WTLV	TGLV	OK	0.0031048	0.0182117	0.00424754	0.0390072	0.0134325	0.0187552	0	0.0192919	0	0.00465438	0.0159596	0.0140205	0.00521763	0.00950646	0.0147766	0.00269257	5.80971	6.33604	0.125116	0.527858	0.12845	0.321642	no
Sulf1	chr1:12692261-12861192	WTLV	TGLV	OK	4.81349	3.66017	3.05078	3.57883	5.69096	3.91584	4.25185	4.96046	2.93671	2.82738	3.11311	2.37277	2.09816	2.97625	3.02869	3.08884	3.94072	5.55173	0.494479	2.13578	5e-05	0.000553274	yes
Slco5a1	chr1:12866548-12993063	WTLV	TGLV	OK	1.35566	1.27835	0.996889	1.54784	1.46598	1.13103	0.998095	1.15064	1.11011	0.889935	0.995183	1.13738	1.05252	1.13301	1.05213	1.04166	1.39663	1.49776	0.100861	0.365742	0.29865	0.542746	no
Ncoa2	chr1:13139104-13374083	WTLV	TGLV	OK	6.49764	7.72199	7.15165	7.45339	7.51753	8.19496	7.98216	7.05972	7.13685	6.89508	8.0948	7.20655	8.29452	6.96059	7.15935	6.59958	9.91526	9.43653	-0.071394	-0.358862	0.31385	0.559369	no
Tram1	chr1:13564692-13589910	WTLV	TGLV	OK	7.48805	5.60687	5.60287	5.50258	7.41817	6.18341	5.97443	6.5835	5.65984	6.87261	5.16203	6.18686	6.64283	6.72478	5.59023	6.90321	8.25476	7.87831	-0.06734	-0.301702	0.3826	0.62528	no
Lactb2	chr1:13625897-13660605	WTLV	TGLV	OK	6.48834	5.24675	4.9716	5.21677	5.10882	5.20441	5.75809	4.78195	4.32407	6.44071	4.91413	5.80809	6.65494	5.88533	4.68247	4.0282	7.59511	6.82858	-0.153486	-0.575996	0.10155	0.275197	no
Gm5048	chr1:15067031-15067558	WTLV	TGLV	OK	105.168	97.0133	91.0702	93.6002	98.2698	94.6002	98.1578	100.556	109.319	108.852	108.2	103.425	113.018	106.039	109.757	123.288	0.855423	0.830464	-0.0427192	-0.0315776	0.95175	0.978298	no
Terf1	chr1:15804981-15844052	WTLV	TGLV	OK	1.78972	1.07012	1.21175	1.17407	1.62901	0.897265	0.881	1.44904	1.57339	1.03226	1.20296	0.960399	1.1981	1.69278	1.7364	1.32591	1.98856	1.71973	-0.209538	-0.499859	0.1522	0.359213	no
Rpl7	chr1:16101294-16104433	WTLV	TGLV	OK	83.4885	74.42	80.7529	74.0825	86.342	83.2274	71.8641	81.9727	75.5335	74.8281	77.3362	76.6702	82.2308	75.1626	73.9421	72.0817	169.15	154.552	-0.130212	-0.797426	0.02155	0.0906525	no
Stau2	chr1:16228802-16520182	WTLV	TGLV	OK	9.75722	8.12107	7.04551	8.92248	8.51493	8.90109	8.64546	7.53679	8.75036	8.93	8.35494	10.2363	8.62091	8.24818	7.95825	9.22538	12.0522	10.8957	-0.145543	-0.700839	0.045	0.155599	no
Ube2w	chr1:16540787-16619415	WTLV	TGLV	OK	3.17657	3.85088	4.80218	3.01225	5.42583	4.53868	3.35453	3.77527	4.0764	3.35368	3.06826	4.10567	3.43005	3.15086	2.64623	2.64991	4.47435	4.97196	0.152138	0.316486	0.3596	0.603021	no
Tceb1	chr1:16641724-16657119	WTLV	TGLV	OK	17.1806	15.0749	14.1851	12.106	16.5616	14.2271	15.5878	14.4422	11.6619	13.4275	14.0002	10.9573	11.8931	14.9432	13.5351	14.9783	16.7688	17.5224	0.0634139	0.222491	0.52195	0.741194	no
Tmem70	chr1:16665190-16678275	WTLV	TGLV	OK	23.364	15.9301	17.7643	17.9523	19.4354	18.8133	18.718	19.0479	20.3673	17.9808	19.1601	18.8545	19.8338	18.4338	20.0742	18.1258	24.8984	22.5718	-0.141535	-0.714088	0.04315	0.151236	no
Ly96	chr1:16688455-16709605	WTLV	TGLV	OK	3.38233	1.7449	1.5424	2.08025	1.05654	0.621943	2.68187	2.09687	2.05225	2.08922	1.97121	2.00431	0.902213	1.48849	2.34473	1.4899	3.06645	2.64953	-0.210832	-0.287575	0.40875	0.64961	no
Jph1	chr1:16942103-17097904	WTLV	TGLV	OK	4.56677	3.91066	3.09952	2.81704	4.20791	4.0154	5.04981	4.12713	4.11476	5.29726	4.68879	4.56926	4.93538	5.70453	4.87998	4.32943	6.34786	4.78288	-0.40839	-1.54366	5e-05	0.000553274	yes
Mcm3	chr1:20803013-20820213	WTLV	TGLV	OK	1.21382	1.33004	0.996346	1.85686	1.68349	1.90371	1.13675	1.28063	1.24616	1.24775	1.12055	1.24294	1.09568	1.51132	1.30491	1.87675	2.02404	1.99315	-0.0221893	-0.0619537	0.85555	0.935074	no
Tram2	chr1:21001396-21079225	WTLV	TGLV	OK	1.86504	1.01875	1.80104	1.26975	1.54214	1.88848	0.995967	1.61378	0.838738	1.29221	1.9565	1.52126	1.31689	0.954166	1.05304	2.06594	2.06188	2.21287	0.101964	0.209993	0.5492	0.759113	no
Gsta3	chr1:21166435-21271685	WTLV	TGLV	OK	1.83469	3.20006	1.62863	1.39753	2.15627	2.44392	1.6983	0.957442	1.15284	1.77661	1.28216	0.829298	0.906935	0.875847	1.9875	1.10124	1.72693	2.68002	0.63404	1.08032	0.00315	0.0200545	yes
Ogfrl1	chr1:23366423-23383210	WTLV	TGLV	OK	3.44611	3.08993	2.81396	3.06104	3.52043	3.41565	2.89984	3.22662	2.93331	3.3016	3.23457	3.54186	3.32936	3.519	3.18054	2.80796	4.55526	4.18014	-0.12398	-0.541915	0.12205	0.311551	no
Smap1	chr1:23761925-23922450	WTLV	TGLV	OK	4.5585	4.3557	4.21091	4.05859	4.90093	4.25108	4.36838	3.9897	4.71398	3.84467	3.89636	4.78341	3.91844	4.02867	2.97851	3.25847	5.5963	5.68712	0.023225	0.0830162	0.8147	0.915692	no
Sdhaf4	chr1:23978190-24005640	WTLV	TGLV	OK	21.7302	17.9655	14.6312	20.4588	18.2617	17.8314	21.3016	17.2089	14.546	18.7647	24.1195	20.3373	22.7521	17.3272	21.3961	20.7035	25.8984	22.4733	-0.204647	-0.744551	0.03575	0.132111	no
Fam135a	chr1:24010757-24100460	WTLV	TGLV	OK	3.60803	3.30131	2.94901	3.20682	2.84423	3.37348	3.72614	3.86416	2.35512	2.73851	2.83675	2.81524	2.64893	3.10006	2.82764	2.75221	3.80341	4.28856	0.173201	0.761324	0.02725	0.108386	no
Lmbrd1	chr1:24678041-24766301	WTLV	TGLV	OK	4.3784	4.11727	3.78911	3.97349	3.74019	4.51252	4.69247	3.81499	3.77895	4.03846	3.24601	3.89588	3.12988	3.9652	4.4266	3.70332	5.08276	5.15558	0.0205229	0.0958897	0.7833	0.899808	no
Phf3	chr1:30802341-30873925	WTLV	TGLV	OK	7.55283	7.1036	6.92176	6.58126	8.72112	7.59932	8.34601	7.96243	6.54211	6.55865	6.21394	6.62343	7.17139	7.46859	6.70924	6.07021	9.09631	9.64052	0.0838295	0.454648	0.1926	0.419338	no
Ptp4a1	chr1:30940302-30950181	WTLV	TGLV	OK	4.45268	3.34211	3.87385	3.96839	4.14677	4.15138	4.26393	4.25786	3.67362	4.22227	4.39233	3.93268	4.09391	4.10445	3.94103	3.69295	3.90504	3.57043	-0.129241	-0.513488	0.14395	0.345954	no
Prim2	chr1:33453807-33669794	WTLV	TGLV	OK	1.01407	1.04205	0.603007	0.946337	2.19263	0.694785	0.749479	0.563416	1.61478	0.801236	0.837992	0.391819	1.15564	0.336285	1.33251	2.00956	1.63358	1.35059	-0.274444	-0.406943	0.2213	0.45463	no
Rab23	chr1:33714182-33742564	WTLV	TGLV	OK	1.18634	0.785192	0.741918	1.2258	1.20069	0.983223	1.20927	1.20353	0.881055	1.11827	1.12583	1.04607	1.06331	1.0137	1.0932	0.627082	1.38083	1.40323	0.0232184	0.0661693	0.84535	0.931286	no
Bag2	chr1:33745483-33757750	WTLV	TGLV	OK	18.5832	14.7055	16.9591	16.9543	18.5504	16.4579	15.944	19.2636	12.3982	12.8043	13.021	12.0224	13.1512	12.316	14.6575	10.0916	16.1096	20.2698	0.331413	1.59046	5e-05	0.000553274	yes
Zfp451	chr1:33761540-33815456	WTLV	TGLV	OK	3.87371	3.60587	2.48743	3.07456	5.85787	3.73867	3.74994	3.70279	2.69558	4.02997	3.28944	3.46486	2.99548	4.10843	3.4095	3.02806	4.57481	4.64884	0.0231571	0.0781365	0.82915	0.923076	no
Dst	chr1:33908212-34308662	WTLV	TGLV	OK	43.3928	64.2447	49.5617	71.8975	57.0842	52.8719	54.3552	56.6187	49.8238	46.5592	55.4107	51.2302	53.0335	52.6976	55.2752	51.3213	67.8103	67.9798	0.00360261	0.022543	0.95015	0.977809	no
LOC108167617	chr1:33908212-34308662	WTLV	TGLV	OK	0	0.253418	0.715724	0.544994	0	0.244596	0	0.732789	0	0.439036	0.254288	0	0	0.338794	0.241423	0.247956	0.854782	0.99925	0.225289	0.0275345	0.82675	0.921476	no
Ccdc115	chr1:34436669-34439672	WTLV	TGLV	OK	3.94536	4.26756	4.01632	4.60339	4.57079	5.68024	3.91525	6.26752	5.18499	4.57279	4.20706	5.66504	5.64139	5.99354	4.86896	3.56655	6.24373	5.61757	-0.152462	-0.513057	0.1439	0.345904	no
Imp4	chr1:34439828-34445747	WTLV	TGLV	OK	2.4829	1.92135	1.941	2.33866	2.0583	2.37443	1.88599	2.00213	1.59923	2.18144	1.66965	2.37676	2.50657	2.21482	1.8638	2.20845	2.90433	2.66728	-0.122836	-0.351769	0.3182	0.563809	no
Ptpn18	chr1:34459008-34473784	WTLV	TGLV	OK	1.87344	0.893342	1.36559	1.63068	1.56583	1.88844	0.677399	1.33551	0.995399	0.542166	0.637392	0.594085	0.923828	0.648969	0.729007	0.451655	0.982801	1.75898	0.839766	1.36852	0.00025	0.00236014	yes
Fam168b	chr1:34813217-34843050	WTLV	TGLV	OK	4.80904	4.21154	4.43751	4.65078	4.29343	4.66136	4.95775	4.21566	3.71963	4.50059	4.06894	3.89509	4.68424	3.91792	4.09924	3.69818	5.37425	5.58999	0.0567813	0.265388	0.45845	0.693972	no
Plekhb2	chr1:34849940-34879585	WTLV	TGLV	OK	14.1981	11.6185	13.4206	12.8764	14.8104	12.1468	16.1734	13.3278	11.1322	12.6538	12.5877	12.8256	12.3074	12.8924	12.0987	13.0113	16.4239	16.2817	-0.0125416	-0.0673275	0.8464	0.931442	no
Hs6st1	chr1:36068399-36106446	WTLV	TGLV	OK	4.05722	3.13101	3.80172	3.44935	4.02779	3.84455	4.30203	3.53329	3.29808	3.86829	3.32332	3.41864	3.87832	3.71442	3.71652	2.90113	4.51937	4.48797	-0.0100606	-0.0410602	0.904	0.958899	no
Uggt1	chr1:36140027-36244302	WTLV	TGLV	OK	5.41545	5.37859	5.05541	6.20141	5.81094	6.13246	4.92187	5.90452	5.42563	5.06508	4.99791	5.13637	6.27975	4.7658	5.06119	4.82551	7.03517	7.143	0.0219464	0.121183	0.72685	0.870706	no
Neurl3	chr1:36264601-36274674	WTLV	TGLV	OK	1.01255	0.736954	1.11253	1.45974	0.820649	1.27052	0.56559	1.38902	0.627655	0.96798	0.91866	0.406011	0.709543	1.05279	1.0634	0.987727	1.16869	1.32113	0.176887	0.349303	0.2989	0.54295	no
Arid5a	chr1:36307732-36324036	WTLV	TGLV	OK	0.557667	0.761698	0.722331	0.61529	0.709143	1.03666	0.718439	0.814224	0.566592	0.493141	0.843385	0.505857	0.603435	0.481846	0.614524	0.872543	0.84047	0.944228	0.167939	0.445144	0.193	0.419746	no
Kansl3	chr1:36335729-36369193	WTLV	TGLV	OK	7.57467	7.41445	7.35699	7.07526	8.46149	7.43563	7.64724	6.58282	6.5009	7.46624	7.15138	6.2445	8.02085	6.98585	6.74361	5.97611	9.22908	9.27325	0.00688811	0.0355089	0.92	0.96723	no
Lman2l	chr1:36372182-36445272	WTLV	TGLV	OK	3.20485	2.83629	3.16977	2.51056	2.67129	2.85994	4.18995	2.85424	2.86836	1.99342	3.03356	2.76336	3.68034	2.06726	3.17571	2.32733	3.92274	4.03351	0.040173	0.122897	0.7314	0.873178	no
Cnnm4	chr1:36471596-36508776	WTLV	TGLV	OK	0.68428	0.538728	0.680296	0.673705	0.724893	0.725517	0.767631	0.75454	0.519895	0.621213	0.390129	0.539483	0.528542	0.612844	0.628253	0.560254	0.756894	0.863836	0.190666	0.452218	0.1936	0.420587	no
Cnnm3	chr1:36511853-36528237	WTLV	TGLV	OK	1.46341	0.987499	1.23333	1.51373	1.08914	1.4237	1.32096	1.51022	1.47834	1.10012	1.29211	1.1962	1.24745	1.04679	1.33294	1.32305	1.66853	1.65766	-0.00942818	-0.0285118	0.9351	0.972303	no
Ankrd23	chr1:36530192-36536556	WTLV	TGLV	OK	81.8656	51.7033	74.6819	97.4946	102.952	76.0324	76.2629	109.212	89.5068	97.4635	145.254	114.632	109.807	93.7365	115.056	91.3441	137.762	99.3361	-0.471784	-3.02979	5e-05	0.000553274	yes
Ankrd39	chr1:36538170-36547440	WTLV	TGLV	OK	0.83611	0.924079	0.793491	1.12172	0.969859	1.06586	0.874883	0.928332	0.478219	0.592528	0.751625	0.636867	1.07006	0.655964	0.725934	0.670673	1.03852	1.28132	0.303105	0.431647	0.1732	0.389947	no
Sema4c	chr1:36548638-36558381	WTLV	TGLV	OK	1.82135	1.57324	2.13483	1.92058	2.07059	2.42651	1.52457	1.86949	1.56454	1.61112	1.65355	1.76841	1.7187	1.2132	1.89696	1.24023	2.29826	2.49673	0.1195	0.384312	0.26315	0.50247	no
Cox5b	chr1:36691486-36693388	WTLV	TGLV	OK	446.163	367.592	386.169	346.963	401.153	410.674	383.322	407.078	398.126	419.816	393.773	430.862	431.374	389.408	393.635	388.026	882.197	744.27	-0.245275	-1.61118	5e-05	0.000553274	yes
Actr1b	chr1:36699199-36710017	WTLV	TGLV	OK	18.2463	15.1607	15.6835	17.7227	19.5304	17.1371	18.1348	17.4307	14.0089	17.0105	12.7583	15.8704	17.4045	14.3514	13.0395	12.3775	19.3378	21.32	0.140783	0.60937	0.08455	0.241814	no
Tmem131	chr1:36792188-36939874	WTLV	TGLV	OK	8.48931	7.98927	7.37749	7.31388	6.89429	7.07162	7.61794	8.39851	6.25006	5.29926	5.75051	5.58505	5.65909	5.59931	6.25774	5.13174	7.70752	9.49891	0.301496	1.63799	5e-05	0.000553274	yes
Cnga3	chr1:37218240-37263384	WTLV	TGLV	OK	0.986455	1.03584	0.878373	0.85495	0.837918	1.2712	0.941326	1.10923	1.10568	0.617076	1.12654	0.787869	0.768939	0.931257	0.783736	0.846664	1.16633	1.26545	0.117684	0.266398	0.44795	0.685219	no
Inpp4a	chr1:37299837-37410740	WTLV	TGLV	OK	2.92137	2.74268	2.55813	3.43379	3.26177	3.09828	3.01488	2.62073	3.10936	2.03758	2.55207	2.32563	3.17523	2.38582	2.65816	2.42734	3.69265	3.86208	0.0647226	0.276866	0.42065	0.660709	no
Coa5	chr1:37417084-37430103	WTLV	TGLV	OK	21.0651	17.5258	19.187	19.6426	20.154	16.2755	16.5904	18.8363	16.4338	15.4423	17.2061	16.3521	16.8064	14.3586	16.2046	16.5537	21.0096	22.2343	0.0817403	0.473055	0.17665	0.395082	no
Unc50	chr1:37430138-37439124	WTLV	TGLV	OK	5.83943	3.97528	4.79932	6.03498	6.93075	4.82154	5.72087	5.82037	6.66931	4.72722	6.04675	4.71994	5.41435	5.47336	4.58204	3.93892	7.31014	7.03403	-0.0555468	-0.169842	0.625	0.807727	no
Mgat4a	chr1:37439339-37541047	WTLV	TGLV	OK	1.66912	1.32947	1.35447	2.20279	1.20161	1.38377	2.44538	1.92382	1.76916	2.58737	1.55246	1.55405	1.97269	1.63023	1.95638	1.90882	2.76715	2.33203	-0.246816	-0.585499	0.0939	0.26031	no
Tsga10	chr1:37754569-37866737	WTLV	TGLV	OK	0.678174	0.865988	0.31433	0.597478	0.850522	0.567557	1.46454	0.765428	0.694556	0.545527	0.577967	0.683896	1.3841	0.779389	1.05956	1.08929	1.29621	1.07396	-0.271359	-0.43753	0.1433	0.345023	no
Lipt1	chr1:37868512-37876298	WTLV	TGLV	OK	2.42715	2.03503	1.66977	1.10207	2.25951	1.41434	2.15067	2.1662	1.90439	2.58016	1.70049	1.81164	2.05052	2.75404	2.70915	2.80938	2.99158	2.27202	-0.396933	-0.895957	0.0105	0.0525622	no
Mitd1	chr1:37878887-37890442	WTLV	TGLV	OK	1.75386	1.10581	1.15927	1.53527	0.951539	0.737499	1.5287	1.44667	0.352985	0.609373	1.13417	1.05267	1.09677	1.01706	1.15833	1.37747	1.28637	1.6989	0.401299	0.56163	0.1068	0.284407	no
Mrpl30	chr1:37890470-37898338	WTLV	TGLV	OK	90.8548	73.0273	85.0403	85.3089	87.0389	83.7769	77.5129	80.5995	100.658	96.5795	90.6605	98.3794	100.29	92.4268	98.7484	96.5748	155.858	125.49	-0.312665	-1.76486	5e-05	0.000553274	yes
Txndc9	chr1:37983866-37997725	WTLV	TGLV	OK	7.08871	7.45569	6.11242	7.24086	7.60089	7.37274	7.18514	7.06644	7.13758	6.59139	6.58903	5.98743	8.02439	6.65342	7.8218	6.42476	11.5068	10.9372	-0.0732431	-0.287434	0.40935	0.650047	no
Eif5b	chr1:37998009-38129920	WTLV	TGLV	OK	19.1208	18.3237	17.9178	18.7371	20.0408	19.2549	19.7621	20.2374	19.227	18.4916	20.0708	19.5884	20.2745	19.5918	18.8723	19.0112	24.8019	22.6993	-0.127802	-0.783906	0.0278	0.109798	no
Rev1	chr1:37998009-38129920	WTLV	TGLV	OK	2.17187	2.06953	1.70862	1.58521	2.04683	1.86292	2.88222	2.17781	1.55981	1.53038	1.75671	1.92273	2.38597	2.27559	2.11034	2.08005	3.83562	3.46326	-0.147329	-0.236744	0.5018	0.727426	no
Lonrf2	chr1:38793651-38836715	WTLV	TGLV	OK	0.677283	0.637979	0.674153	0.726555	0.839035	0.793173	0.623645	0.90177	0.861453	0.615774	0.548739	0.627478	0.857582	0.672379	0.833553	0.894904	1.06698	0.939482	-0.18359	-0.491885	0.1649	0.378024	no
Pdcl3	chr1:38987813-38997236	WTLV	TGLV	OK	11.3083	7.90582	8.50996	8.76461	8.54678	7.91389	11.0755	9.86753	10.1028	7.84048	9.5448	10.0748	9.40299	8.11168	9.33637	9.6834	12.872	11.6449	-0.144534	-0.6152	0.07505	0.223057	no
Npas2	chr1:39193714-39363240	WTLV	TGLV	OK	0.720146	0.159221	0.884668	0.465924	0.976191	0.852659	0.19662	1.39154	0.486893	0.514078	0.809422	0.987613	0.740944	0.470927	1.03331	0.354995	1.06634	1.00076	-0.0915688	-0.21896	0.53045	0.74539	no
Rpl31	chr1:39367850-39478775	WTLV	TGLV	OK	9.77727	8.61352	9.12015	8.65334	9.63395	9.86818	9.567	10.1517	10.1778	9.87593	8.70221	10.5238	9.41337	10.5365	9.37811	8.77166	116.71	102.532	-0.186854	-1.07124	0.00245	0.0164759	yes
Tbc1d8	chr1:39367850-39478775	WTLV	TGLV	OK	1.9307	1.03587	0.639548	1.19438	1.68123	1.44341	0.942239	1.23186	1.0871	0.99745	1.13519	1.74724	1.52173	1.14955	1.41337	1.17053	1.84164	1.71631	-0.101678	-0.139551	0.68815	0.847727	no
Cnot11	chr1:39535801-39546881	WTLV	TGLV	OK	2.65635	3.11903	2.5228	2.38619	2.6539	2.60329	2.64334	2.58341	2.39767	2.6328	2.25693	2.78656	3.52061	2.33141	2.2547	2.0888	3.44436	3.3343	-0.0468519	-0.164865	0.64395	0.820121	no
Snord89	chr1:39548746-39548840	WTLV	TGLV	OK	0	0	0	0	63.482	226.738	64.7349	68.7214	0	108.805	177.659	108.385	65.0516	186.054	97.5333	201.42	151.788	61.5437	-1.30237	-8.32152	0.0523	0.173051	no
Rnf149	chr1:39551293-39577438	WTLV	TGLV	OK	2.21467	2.27928	1.84468	2.10252	3.12751	2.24519	2.17601	2.55491	2.07618	2.46951	1.66495	1.94628	1.58604	2.1419	1.99779	1.70189	2.65806	2.93554	0.143253	0.423747	0.23105	0.465762	no
Gm3646	chr1:39804140-39805332	WTLV	TGLV	OK	11.5992	4.23147	8.74377	5.41993	11.6462	4.35776	9.105	13.8682	8.14388	5.76651	6.51857	5.74428	8.75173	9.86062	5.9644	7.80097	9.80531	10.333	0.0756221	0.126914	0.71805	0.865039	no
Map4k4	chr1:39900911-40026310	WTLV	TGLV	OK	29.305	24.4254	27.8266	26.0533	29.5569	28.8976	28.5888	31.2048	21.8619	21.9998	24.0321	22.2539	26.095	22.1632	25.6081	22.5358	31.4357	34.7329	0.143898	0.86784	0.0134	0.0639148	no
Il1r1	chr1:40225013-40316201	WTLV	TGLV	OK	1.85582	1.812	2.11143	2.35799	2.82017	2.81331	2.20655	2.20996	1.78903	2.45499	2.02115	1.43045	1.84625	1.45019	2.2427	1.8556	2.61776	2.86709	0.131257	0.487244	0.1499	0.355415	no
Slc9a2	chr1:40681711-40768885	WTLV	TGLV	OK	0.316776	0.239003	0.11608	0.378587	0.482391	0.378672	0.264876	0.381612	0.583828	0.487595	0.519234	0.781368	0.58938	0.326261	1.23524	0.431698	0.921164	0.447721	-1.04086	-1.9302	5e-05	0.000553274	yes
Tmem182	chr1:40805572-40856887	WTLV	TGLV	OK	26.6366	24.6301	26.6298	24.3744	20.8711	23.3121	25.6694	27.8407	27.0387	35.2742	37.4084	31.2277	36.6219	36.1345	35.079	35.3567	45.4716	30.9243	-0.556223	-2.61834	5e-05	0.000553274	yes
Mrps9	chr1:42851232-42905683	WTLV	TGLV	OK	43.4263	38.0881	38.553	39.7715	40.4949	35.538	41.9994	40.6322	37.8829	42.8305	40.4443	43.4828	43.2959	43.0417	45.3322	41.6609	56.6755	49.5734	-0.193159	-1.08664	0.00185	0.0131354	yes
Tgfbrap1	chr1:43047264-43098637	WTLV	TGLV	OK	3.99834	3.36696	3.70162	3.07285	3.92856	3.2037	3.31404	4.36537	1.9918	1.71088	2.30396	3.83957	2.6891	3.15106	2.86228	3.14192	3.62003	4.52176	0.320884	0.909759	0.01075	0.0535643	no
AI597479	chr1:43098709-43115946	WTLV	TGLV	OK	4.42386	4.108	4.13122	3.78746	4.70844	4.03917	4.59095	4.62999	3.45426	4.00821	4.11582	3.80059	4.6903	4.03175	4.34233	3.61082	5.30366	5.16583	-0.0379884	-0.15836	0.6504	0.824307	no
Fhl2	chr1:43123070-43198299	WTLV	TGLV	OK	508.27	411.752	379.533	448.465	460.077	424.517	469.927	441.984	398.928	385.887	412.428	411.005	434.336	401.558	413.107	409.901	523.717	523.912	0.000538574	0.00357295	0.9916	0.996467	no
Gm8210	chr1:43123070-43198299	WTLV	TGLV	OK	16.2098	14.4405	13.4135	12.8873	12.5851	15.2661	13.9129	14.0022	12.095	13.3951	13.3911	14.4304	15.2366	14.0517	14.2851	13.1813	0.929882	0.963544	0.051303	0.00937278	0.9627	0.983621	no
Nck2	chr1:43445750-43570518	WTLV	TGLV	OK	2.21584	1.94005	2.36077	2.05167	2.61046	2.09482	2.74668	2.77453	1.93605	2.35912	1.89945	2.17445	2.09137	2.29523	2.34565	1.68163	3.05265	3.14948	0.0450508	0.145462	0.67945	0.842387	no
Uxs1	chr1:43747849-43827819	WTLV	TGLV	OK	2.29845	2.50652	2.55299	2.99922	4.34304	1.81077	3.15951	2.27291	1.52709	1.78281	1.73575	2.13289	1.82035	1.39421	1.17749	2.27521	4.94372	5.60256	0.180488	0.446091	0.2074	0.437159	no
Tpp2	chr1:43933864-44003000	WTLV	TGLV	OK	7.94096	7.70967	6.98781	9.48906	8.66747	7.79911	8.61892	9.13147	6.76673	8.3485	8.01774	8.23494	7.74717	8.0755	7.69447	7.86528	10.8557	10.5581	-0.040103	-0.212697	0.547	0.757272	no
Tex30	chr1:44086612-44102495	WTLV	TGLV	OK	2.45223	1.19888	1.51393	1.29936	0.979423	0.764087	1.82127	0.810784	0.805741	1.97492	1.48336	0.590181	1.00364	0.281415	0.118019	0.91398	1.38293	1.90699	0.463566	0.7678	0.01755	0.0776071	no
Kdelc1	chr1:44106545-44118926	WTLV	TGLV	OK	2.54029	2.63885	2.90127	2.77539	2.34929	3.25956	2.58279	2.83449	2.11816	2.36988	2.01948	3.33538	1.77315	1.66638	2.38743	2.53466	3.21103	3.39991	0.0824643	0.23658	0.49615	0.722778	no
Bivm	chr1:44118961-44144771	WTLV	TGLV	OK	1.6304	1.22631	1.2311	1.19118	1.89644	1.6181	1.41045	1.55868	0.839329	1.14798	1.56582	1.55894	1.47807	1.51715	0.85743	1.27362	1.7623	1.8786	0.0922036	0.258574	0.455	0.690911	no
Ercc5	chr1:44146980-44181260	WTLV	TGLV	OK	4.13646	3.90169	3.46939	3.39238	3.35447	4.05679	4.30042	3.7217	2.55539	2.73638	3.4266	3.55889	3.87663	2.94372	3.47704	3.17532	4.35098	4.77031	0.132742	0.554771	0.1159	0.301315	no
Gulp1	chr1:44551496-44796838	WTLV	TGLV	OK	0.869103	0.338773	0.798756	0.590987	0.902478	0.372142	0.675311	0.405081	0.427851	0.352115	0.54209	0.551191	0.721789	0.580608	0.811646	0.419065	0.994984	0.863681	-0.204174	-0.408507	0.22595	0.460345	no
Col3a1	chr1:45311537-45349706	WTLV	TGLV	OK	43.9852	30.1723	39.1873	50.4224	66.1628	38.3181	36.0702	52.9893	21.5147	18.2402	21.2175	18.4825	23.8517	19.0915	24.3518	20.1504	28.3148	53.8771	0.928116	5.89054	5e-05	0.000553274	yes
Col5a2	chr1:45374330-45503282	WTLV	TGLV	OK	3.52541	2.6699	3.94335	5.2863	5.14601	3.53657	3.86408	4.77197	2.13045	1.66445	2.14224	1.72306	2.52686	1.86025	2.9353	2.00382	3.2419	5.37974	0.730698	3.39386	5e-05	0.000553274	yes
Wdr75	chr1:45795152-45823638	WTLV	TGLV	OK	3.24442	2.71149	2.8983	2.30207	2.4497	3.48008	2.69734	3.0445	2.05896	2.34189	2.71997	1.87419	2.23277	2.57425	2.33372	2.51603	3.57395	3.92159	0.133917	0.44889	0.2029	0.431984	no
Slc40a1	chr1:45908069-45926536	WTLV	TGLV	OK	1.14815	1.06617	1.28441	1.11445	1.69844	1.78423	1.5674	1.33114	2.41836	2.10755	1.82818	1.66205	1.94915	1.97087	2.55833	2.01172	2.78933	1.72941	-0.689637	-2.10704	5e-05	0.000553274	yes
Slc39a10	chr1:46807543-46925773	WTLV	TGLV	OK	1.60176	1.51098	2.10293	1.54321	2.42486	1.44015	1.27185	1.84876	1.3796	1.50988	1.70902	1.50409	1.525	1.77974	1.3929	1.3568	2.05744	2.13361	0.0524467	0.183236	0.6022	0.792922	no
Sdpr	chr1:51218385-51333779	WTLV	TGLV	OK	44.352	36.3075	38.0017	40.4536	42.0339	39.2257	38.2367	38.7842	35.2697	35.435	35.7457	37.1985	37.1956	42.4026	42.0673	37.9823	48.7343	47.1118	-0.0488482	-0.303239	0.38695	0.629605	no
Nabp1	chr1:51465805-51478414	WTLV	TGLV	OK	6.86005	6.89072	5.15708	7.66344	6.44358	5.92837	7.6887	7.66549	8.48969	8.82031	8.06938	7.04711	8.34865	7.43656	8.61232	9.79706	11.1702	8.35918	-0.418218	-1.77387	5e-05	0.000553274	yes
Myo1b	chr1:51749757-51915978	WTLV	TGLV	OK	5.0102	3.7413	3.54394	5.36573	3.68683	3.95992	3.98572	4.6014	4.3783	3.73267	4.25716	4.14609	4.31419	4.5573	3.94479	4.37805	5.91113	5.38576	-0.134285	-0.623183	0.07795	0.228518	no
Stat1	chr1:52119437-52161865	WTLV	TGLV	OK	13.4872	7.7727	7.06748	9.03683	9.48473	10.5684	8.18351	7.05865	7.67455	15.9745	8.58062	6.07124	6.78782	11.2002	8.54417	6.76058	12.5173	11.358	-0.140222	-0.733291	0.03755	0.136797	no
Gls	chr1:52163448-52233719	WTLV	TGLV	OK	5.97731	5.49468	5.3896	5.71943	6.46737	6.83019	6.21922	6.77227	6.0655	6.34935	6.07241	6.00156	6.08907	6.52324	6.493	6.74538	8.45322	7.62336	-0.149073	-0.734047	0.0391	0.14101	no
Nab1	chr1:52455848-52500448	WTLV	TGLV	OK	11.058	9.49114	10.6717	10.7042	11.6834	10.1638	11.1858	12.9989	9.26562	8.25781	7.51164	9.42415	8.17988	8.94973	7.60695	8.41868	11.4139	13.5822	0.250924	1.2901	0.0001	0.00103854	yes
Mfsd6	chr1:52656298-52727462	WTLV	TGLV	OK	4.65202	4.29138	4.12195	4.31513	4.13089	4.38108	4.70676	4.36918	4.00623	2.68225	3.33321	3.8565	3.84955	3.85052	4.00583	3.4161	4.75546	5.24812	0.142214	0.635066	0.0702	0.212704	no
Inpp1	chr1:52785424-52817688	WTLV	TGLV	OK	2.34732	2.17133	2.09612	2.61136	2.93133	3.78292	2.13222	3.18314	2.86108	2.08109	1.86733	2.30188	2.74538	2.07652	2.27766	2.59247	3.2526	3.36937	0.0508846	0.134325	0.70715	0.858817	no
Hibch	chr1:52845037-52920986	WTLV	TGLV	OK	28.638	26.0015	21.9984	24.6129	24.9709	23.4636	29.27	22.9508	23.5343	23.0307	22.6885	25.1936	21.7252	26.8382	21.0272	24.436	36.1772	34.7987	-0.0560477	-0.309378	0.37755	0.620534	no
Pms1	chr1:53189186-53297028	WTLV	TGLV	OK	1.25215	0.96432	1.22817	1.02082	1.17685	1.06239	1.17847	0.68599	0.896792	0.93278	0.764239	1.18498	1.28987	1.28231	1.32131	1.13314	1.50755	1.45564	-0.0505508	-0.123912	0.7084	0.85969	no
Ormdl1	chr1:53297094-53310245	WTLV	TGLV	OK	3.8051	1.76671	2.18449	2.55303	2.11721	2.91868	2.68928	2.493	1.73159	2.46163	2.24533	2.0505	2.70243	2.24982	2.70121	2.06243	3.09508	3.17791	0.0381011	0.105083	0.7641	0.88927	no
Osgepl1	chr1:53312891-53332724	WTLV	TGLV	OK	19.4135	13.0053	14.2298	12.9508	13.0962	14.3968	15.3245	14.7264	14.9287	14.9935	12.8637	13.8649	14.2745	16.4969	14.9469	14.4535	19.9256	18.416	-0.113657	-0.505686	0.15295	0.360192	no
Asnsd1	chr1:53344616-53352752	WTLV	TGLV	OK	39.3616	37.1652	33.3996	31.2819	32.3353	37.5581	35.7642	35.7383	30.0626	36.1871	35.767	36.4833	35.6553	30.5991	30.663	29.5847	42.8948	42.4728	-0.014265	-0.0608824	0.861	0.937869	no
Stk17b	chr1:53396994-53785215	WTLV	TGLV	OK	1.67341	1.25888	1.51518	1.23648	2.10643	1.08936	2.06471	1.97697	1.17989	1.63308	1.35551	1.1749	1.56628	1.29931	1.26069	1.01588	1.79095	2.01295	0.168588	0.481381	0.1685	0.382937	no
Hecw2	chr1:53806871-54195034	WTLV	TGLV	OK	1.64154	2.37708	1.33071	2.86302	2.02879	2.26319	2.49665	1.24395	1.86657	1.68714	1.42406	1.35605	1.15781	2.19382	1.3334	1.91983	2.30869	2.78487	0.270535	0.526865	0.1283	0.321402	no
Gtf3c3	chr1:54395876-54439026	WTLV	TGLV	OK	1.69244	1.88326	2.10182	1.89736	1.69978	1.7346	1.89028	2.07189	1.64787	1.5293	1.69303	1.51579	1.49494	1.79133	1.73416	1.89681	2.71913	2.90279	0.094291	0.359784	0.29965	0.543742	no
Ankrd44	chr1:54645339-54926732	WTLV	TGLV	OK	1.03148	0.825268	0.656173	0.919803	0.812284	0.959971	0.891225	0.907612	0.707029	0.791881	0.702111	0.774789	0.618629	0.694967	0.955361	1.19283	1.30701	1.21793	-0.101837	-0.310435	0.3667	0.610685	no
Sf3b1	chr1:54985168-55027493	WTLV	TGLV	OK	23.5261	25.9396	24.2434	21.3433	22.6422	25.9822	26.1704	19.6273	17.8931	18.9031	17.8269	17.4805	18.2986	18.6784	18.2044	15.7471	24.4963	28.8046	0.233739	0.752907	0.03075	0.11856	no
Coq10b	chr1:55052769-55072702	WTLV	TGLV	OK	5.74332	7.38795	4.417	4.6477	4.98576	5.55598	11.4066	4.18828	3.23073	4.99047	3.70593	3.38232	5.35427	3.79921	3.14576	5.44179	5.95525	7.96186	0.418943	1.46759	0.0001	0.00103854	yes
Hspd1	chr1:55077833-55091317	WTLV	TGLV	OK	46.679	41.9851	39.9164	38.5657	41.0779	36.6583	43.5641	41.2115	42.6229	49.2969	46.6581	49.0567	46.1221	49.4882	45.7003	48.1174	79.2304	64.675	-0.292847	-1.57545	5e-05	0.000553274	yes
Hspe1	chr1:55077833-55091317	WTLV	TGLV	OK	56.9493	46.7678	44.7337	39.2146	43.1424	37.409	46.9745	43.2567	39.7045	42.051	41.3482	52.1871	47.2043	44.1068	44.7235	51.1263	111.454	101.502	-0.134947	-0.442241	0.2107	0.441284	no
Mob4	chr1:55131244-55154899	WTLV	TGLV	OK	4.21803	3.8873	4.45072	3.25748	3.60894	3.74009	4.12378	3.79627	4.36933	3.18255	4.58895	4.5401	5.06594	5.11644	3.95691	3.56029	6.20409	5.49392	-0.175383	-0.705828	0.0415	0.147153	no
Rftn2	chr1:55170158-55235534	WTLV	TGLV	OK	1.74729	0.539154	1.2051	1.22971	1.52487	0.966518	0.782297	1.35611	1.65431	1.25776	1.11809	1.24288	1.28539	0.882673	1.1436	1.50093	1.84905	1.55828	-0.246832	-0.4232	0.2043	0.433228	no
Mars2	chr1:55237176-55240058	WTLV	TGLV	OK	1.62895	1.6481	1.36846	1.27238	1.82271	1.95305	1.44048	1.20855	1.46045	1.74425	1.68333	1.50412	1.70435	1.20196	1.56356	1.54219	1.99355	1.83049	-0.123107	-0.338582	0.33425	0.579408	no
Plcl1	chr1:55404263-55754285	WTLV	TGLV	OK	0.606222	0.752348	0.577246	0.402539	0.749639	0.725764	0.499822	0.749086	0.661972	0.614966	0.60248	0.853257	0.718932	0.84502	0.679231	0.711518	0.958928	0.790617	-0.278443	-0.746969	0.0362	0.133482	no
1700066M21Rik	chr1:57377594-57385423	WTLV	TGLV	OK	1.13522	0.366569	0.340373	0.409217	0.968352	1.20937	0.63242	1.52868	0.380419	1.81841	0.548092	0.809311	0.557468	0.598967	1.26541	0.437278	1.11882	1.0028	-0.157946	-0.14015	0.68755	0.847683	no
Tyw5	chr1:57388234-57415958	WTLV	TGLV	OK	0.764595	0.9854	0.878357	1.82186	0.701954	1.2601	0.964136	1.13984	1.23696	0.633832	0.785789	1.03027	1.37835	1.78386	0.718985	1.74586	1.66654	1.46614	-0.18483	-0.205961	0.52135	0.740947	no
9430016H08Rik	chr1:57388234-57415958	WTLV	TGLV	OK	6.49934	5.17311	5.85203	4.5554	5.22056	6.37506	6.59904	4.29745	6.40121	5.21952	4.80917	4.64232	8.41454	6.26517	6.85113	6.90173	8.41115	7.05747	-0.253151	-0.7769	0.0272	0.108369	no
Spats2l	chr1:57774161-57948398	WTLV	TGLV	OK	2.05733	1.93026	2.25144	1.59213	2.37828	2.00037	3.65516	3.13835	1.35537	1.80099	1.79641	2.91096	3.06454	3.5403	2.38186	2.17983	3.5226	3.42749	-0.0394875	-0.106173	0.7589	0.88697	no
Kctd18	chr1:57955100-57970084	WTLV	TGLV	OK	0.833845	0.713894	0.757912	1.05278	0.483118	0.554006	1.25388	1.09019	0.772483	0.868703	0.843818	0.708688	0.658906	0.714572	0.698081	0.729458	0.956527	1.08053	0.175858	0.341151	0.3034	0.547843	no
Sgol2a	chr1:57985339-58026277	WTLV	TGLV	OK	2.91273	2.50638	1.49431	2.60331	2.77454	2.60945	2.72342	2.53754	3.26797	3.14435	2.84002	2.89622	2.78207	3.20963	3.19141	3.29343	3.98569	3.00463	-0.407641	-1.57856	5e-05	0.000553274	yes
Aox1	chr1:58029805-58106410	WTLV	TGLV	OK	3.68447	3.57547	3.05496	2.85911	3.02301	4.26831	4.21305	4.44823	2.12243	2.41448	3.34593	2.34432	3.43317	2.73067	2.91167	3.01093	4.12935	4.99647	0.274996	1.15954	0.001	0.00781308	yes
Bzw1	chr1:58393135-58407354	WTLV	TGLV	OK	10.0428	9.13342	9.16074	11.2835	12.0027	11.2443	10.8718	10.2496	9.64744	10.4785	8.8654	10.4888	10.1806	10.8155	9.04214	9.1667	14.4789	14.633	0.0152692	0.0773375	0.8247	0.920672	no
Clk1	chr1:58411987-58424088	WTLV	TGLV	OK	12.5587	14.6365	13.1061	10.4493	12.9062	16.0206	12.7187	12.9414	11.7169	11.1666	11.5707	10.0646	11.0971	12.3495	11.5188	10.6271	15.0223	15.9555	0.0869453	0.376861	0.29085	0.535165	no
Ppil3	chr1:58430992-58462276	WTLV	TGLV	OK	7.17392	4.16288	4.10279	5.32575	6.83268	3.853	6.00067	4.37848	4.51732	4.81749	6.07949	6.89681	4.98932	3.86242	4.07966	4.92592	6.71544	6.72266	0.00155149	0.00275529	0.9932	0.997043	no
Nif3l1	chr1:58430992-58462276	WTLV	TGLV	OK	3.55892	2.78622	3.24988	2.30631	3.71982	2.13565	3.2969	3.57333	2.34541	2.81782	2.36295	2.70249	3.42187	2.83419	1.93825	2.33014	3.76018	3.97377	0.079708	0.199599	0.5744	0.77597	no
Orc2	chr1:58462770-58505109	WTLV	TGLV	OK	2.03675	2.17953	1.79483	2.12794	1.81984	2.35999	2.30255	2.54881	1.51646	1.59749	1.93649	1.69664	1.66069	1.4131	2.25681	1.71945	2.47798	2.78286	0.167406	0.558242	0.10745	0.285752	no
Fam126b	chr1:58505134-58586333	WTLV	TGLV	OK	0.814141	0.981008	0.935524	0.656259	1.08004	0.65482	0.787422	0.985694	0.741678	0.725958	0.726009	0.698088	0.724674	0.783517	0.634931	0.890137	1.0387	1.09874	0.0810663	0.266217	0.44195	0.679964	no
Ndufb3	chr1:58586396-58595964	WTLV	TGLV	OK	63.5788	50.4052	60.2567	54.3901	61.9775	60.1757	66.3267	60.9989	65.4764	52.9856	65.4488	54.748	68.7643	60.8204	56.3263	54.8205	81.2164	74.2278	-0.129813	-0.67541	0.0569	0.183148	no
Cflar	chr1:58711306-58759209	WTLV	TGLV	OK	4.813	4.33976	4.41749	5.0032	5.34286	5.65911	5.12324	4.35082	4.46886	4.50358	4.54557	5.13962	4.64601	4.39913	3.9493	4.45094	5.74606	5.90351	0.0389991	0.191281	0.5851	0.78369	no
Casp8	chr1:58795227-58847503	WTLV	TGLV	OK	2.10053	2.11964	2.47747	2.88058	3.41271	2.9042	1.89969	2.44721	2.07141	2.3115	2.75926	1.64256	2.07507	2.32418	2.37873	2.29251	3.03136	3.21804	0.0862156	0.263283	0.454	0.69057	no
Trak2	chr1:58900448-58973482	WTLV	TGLV	OK	42.8236	41.3733	41.066	49.2188	46.2243	41.5143	45.2491	46.3192	29.6476	29.4027	32.2462	31.4077	31.6254	30.6855	29.86	30.5907	39.7245	52.754	0.409254	2.66806	5e-05	0.000553274	yes
Stradb	chr1:58973526-59022925	WTLV	TGLV	OK	10.134	9.91339	8.88044	9.95775	9.26809	8.60568	10.1036	9.58381	7.58059	9.00385	8.50035	8.19978	7.76232	8.31414	8.64413	8.91895	9.54937	10.0685	0.0763709	0.311034	0.3754	0.618383	no
Tmem237	chr1:59100583-59120695	WTLV	TGLV	OK	1.11311	0.783903	1.10196	0.584357	0.701634	0.884182	1.07458	0.863954	0.81647	0.558944	0.840362	0.583612	0.501833	0.331206	0.766851	0.507723	0.939536	1.38275	0.557525	0.980002	0.0055	0.0317054	yes
Als2	chr1:59120934-59237231	WTLV	TGLV	OK	2.4135	1.86164	1.46586	1.34519	1.55787	2.12334	1.8389	1.78071	1.42093	1.85969	2.05076	1.27659	1.60631	1.60315	1.61233	1.84039	2.64828	2.69803	0.026851	0.08725	0.80445	0.90991	no
Fzd7	chr1:59482146-59486955	WTLV	TGLV	OK	1.14555	1.24762	0.912116	1.70802	1.65667	1.50126	1.51367	1.24821	1.12757	1.48408	1.20173	1.08614	1.03216	0.880443	1.22174	1.42974	1.52376	1.62059	0.0888854	0.277273	0.43205	0.672021	no
Sumo1	chr1:59639433-59670834	WTLV	TGLV	OK	20.5437	18.2704	19.9408	18.8088	17.6542	20.3332	21.2405	19.1874	17.8115	20.7693	21.5511	19.5912	19.5528	20.0153	16.7549	19.2879	35.714	34.8814	-0.0340327	-0.171087	0.6293	0.810797	no
Nop58	chr1:59684950-59711510	WTLV	TGLV	OK	8.85845	5.6922	7.87687	6.61716	7.94707	6.35875	7.60517	9.27563	8.03028	6.68481	7.1901	7.38045	7.3359	6.58209	8.08476	5.72646	10.1505	9.51967	-0.0925653	-0.387411	0.26655	0.506265	no
Snord70	chr1:59684950-59711510	WTLV	TGLV	OK	410.707	381.383	1926.41	826.691	1154.64	1178.3	784.955	416.647	897.122	1759.11	2154.24	0	1183.19	376.005	1576.88	407.059	1597.22	1059.46	-0.592235	-0.321306	0.5556	0.764366	no
Bmpr2	chr1:59764269-59878081	WTLV	TGLV	OK	8.92369	8.978	9.07914	9.68316	9.53964	9.69322	9.26035	10.0573	9.0461	9.93002	9.57307	9.17852	9.0674	9.76067	10.9813	9.3162	12.489	11.3016	-0.144136	-0.884583	0.0114	0.0561877	no
Fam117b	chr1:59913005-59985348	WTLV	TGLV	OK	3.29928	2.98428	1.92007	3.87388	2.38184	2.76952	4.61248	2.91313	3.24303	3.54588	2.84577	2.09847	2.99225	2.3381	1.65379	2.47065	3.546	3.7941	0.097566	0.417815	0.23575	0.47154	no
Wdr12	chr1:60076867-60153953	WTLV	TGLV	OK	2.33957	1.69319	1.71747	2.26988	1.8191	1.87312	2.45599	2.14798	1.56664	1.7573	2.22717	1.73767	2.7452	2.31707	1.82921	1.6264	5.35975	4.67771	-0.196362	-0.590898	0.09615	0.264379	no
Carf	chr1:60076867-60153953	WTLV	TGLV	OK	0.79918	0.537004	0.700374	0.734732	0.529158	0.75042	0.780802	0.950263	0.631418	0.627652	0.536445	0.824069	0.924443	0.732661	0.781318	0.77379	1.25899	1.0875	-0.21125	-0.452978	0.16765	0.381812	no
Nbeal1	chr1:60178624-60338328	WTLV	TGLV	OK	6.27359	6.4438	6.43677	6.53204	6.59186	6.46569	6.27291	6.62434	5.58802	5.15294	6.43029	6.4126	6.1	6.41833	6.48439	5.88526	8.33588	8.12821	-0.0363984	-0.197414	0.57525	0.776341	no
Cyp20a1	chr1:60343299-60388060	WTLV	TGLV	OK	2.70984	2.23497	1.49534	2.17459	3.10999	2.64234	2.38308	3.37333	2.02192	1.81227	2.26374	2.67033	1.91431	2.24324	1.28527	1.72486	2.93822	3.25235	0.146539	0.427213	0.2194	0.452219	no
Abi2	chr1:60408997-60567074	WTLV	TGLV	OK	2.29203	2.42987	2.13511	2.0088	2.71395	2.26644	2.01727	2.27082	1.64757	1.96481	1.61726	1.57486	1.69009	2.07111	2.03094	2.1753	2.4857	2.80826	0.176025	0.338997	0.3148	0.560134	no
Raph1	chr1:60408997-60567074	WTLV	TGLV	OK	19.9072	21.3482	16.3583	22.0081	18.66	19.8934	22.3111	18.8547	15.2049	10.3705	12.5108	14.3109	14.714	13.7122	11.9296	13.9766	17.5057	23.3002	0.41252	1.81781	5e-05	0.000553274	yes
Pard3b	chr1:61638666-62642284	WTLV	TGLV	OK	2.1995	2.8569	2.38708	2.46413	2.7461	2.15415	3.12824	2.51992	2.32445	1.98145	2.28182	1.90589	2.35412	2.6885	2.59585	2.12347	3.12214	3.40883	0.126741	0.475815	0.17345	0.390362	no
Nrp2	chr1:62703316-62818692	WTLV	TGLV	OK	6.70313	5.73522	5.31543	10.0903	7.58584	7.19945	6.50598	6.90141	7.24902	5.72613	6.56537	6.18655	6.92366	6.426	6.30507	6.27432	8.83844	8.70299	-0.0222802	-0.114218	0.73955	0.877859	no
Ino80d	chr1:63047800-63114267	WTLV	TGLV	OK	4.82376	4.52449	4.62832	5.37227	4.77403	5.3317	5.47682	5.24618	3.54536	3.74566	4.87711	4.40711	5.01137	4.38789	4.43768	4.24744	5.87822	6.16928	0.0697232	0.238592	0.4934	0.721405	no
Ndufs1	chr1:63114470-63176822	WTLV	TGLV	OK	134.392	121.846	115.491	101.955	120.136	123.873	128.361	122.488	130.102	134.19	123.982	137.202	138.32	132.09	129.114	128.242	169.379	144.276	-0.231422	-1.53054	5e-05	0.000553274	yes
Eef1b2	chr1:63176830-63180486	WTLV	TGLV	OK	41.8601	35.533	33.7245	35.2907	38.734	38.4115	37.6279	38.9331	36.1594	37.6481	36.1334	37.523	44.1019	38.2199	38.4634	38.4663	54.3543	49.2298	-0.142863	-0.843026	0.01725	0.0766818	no
Fastkd2	chr1:63730598-63753385	WTLV	TGLV	OK	5.14306	5.16003	4.42411	4.96822	5.84609	5.2038	6.15958	5.57236	3.93866	3.83855	4.87477	5.03328	4.87215	6.13807	5.21752	6.11422	6.88856	6.6119	-0.0591366	-0.22399	0.5232	0.741723	no
Klf7	chr1:64029447-64242198	WTLV	TGLV	OK	4.91465	4.14675	5.31098	3.84112	5.30325	5.81482	4.87298	4.84056	3.35958	5.27366	3.82654	5.20899	4.64562	5.39831	5.10275	4.90285	6.39431	6.05683	-0.078225	-0.187524	0.5845	0.783196	no
Creb1	chr1:64532314-64604548	WTLV	TGLV	OK	2.76253	2.92437	3.14916	2.56515	3.21326	3.34363	3.72752	2.97062	2.5343	2.69796	2.80779	3.34768	2.9915	2.99114	2.8221	2.87966	3.76308	3.72855	-0.0132974	-0.0611827	0.85735	0.935799	no
Mettl21a	chr1:64606472-64618552	WTLV	TGLV	OK	0.899415	0.762755	0.933008	1.0094	1.04459	0.710722	0.739473	0.911578	0.953091	0.991058	0.972588	1.04202	1.02361	1.02817	1.04045	0.687936	1.28791	1.06002	-0.280937	-0.598669	0.08275	0.238307	no
Ccnyl1	chr1:64691040-64725646	WTLV	TGLV	OK	2.51166	1.98095	2.17395	2.16772	2.41417	1.97441	1.86907	2.21556	1.66348	1.92381	1.67497	2.0254	1.78337	1.84402	1.4514	1.14468	3.11309	3.45149	0.148875	0.457468	0.19435	0.42121	no
Plekhm3	chr1:64789119-64956824	WTLV	TGLV	OK	0.748148	0.955263	0.721933	0.870607	0.847171	0.849619	0.781968	0.90128	0.663891	0.567439	0.866593	0.798039	0.845689	0.742014	0.733075	0.571569	0.965674	1.03933	0.106046	0.349187	0.31675	0.56225	no
Idh1	chr1:65158615-65186479	WTLV	TGLV	OK	11.2815	12.3012	11.4878	9.82677	10.8008	11.3365	10.2958	10.7734	10.4263	12.0857	10.6418	10.0793	11.6567	12.8513	9.47947	11.9964	14.8169	13.5177	-0.132388	-0.632309	0.07565	0.223696	no
Pikfyve	chr1:65186637-65278696	WTLV	TGLV	OK	1.22088	1.21572	1.27809	1.26303	1.1149	1.34129	1.61434	1.13513	0.926082	0.84534	1.01287	1.32746	1.10251	1.17959	1.32041	1.22027	1.70052	1.79708	0.0796765	0.282268	0.41625	0.65693	no
Rpe	chr1:66700811-66817596	WTLV	TGLV	OK	1.47412	1.48085	1.10035	1.48884	1.55629	1.53272	1.63893	1.343	1.01163	1.72708	1.40334	0.938434	1.44513	1.21677	1.28934	0.940375	1.78716	1.89573	0.0850829	0.134514	0.6986	0.853075	no
Kansl1l	chr1:66700811-66817596	WTLV	TGLV	OK	6.39604	5.06857	4.73891	4.55164	5.44886	4.9343	5.53099	5.3862	4.28394	4.83477	4.95245	5.29819	4.94673	5.22361	4.31647	4.17936	6.39537	6.55675	0.0359538	0.141736	0.68	0.842601	no
Acadl	chr1:66830838-66863309	WTLV	TGLV	OK	372.832	319.319	303.189	292.632	327.495	321.854	354.536	325.031	339.9	364.015	324.755	364.88	375.839	351.205	357.292	353.727	455.656	389.116	-0.227744	-1.51436	5e-05	0.000553274	yes
Myl1	chr1:66924294-66945473	WTLV	TGLV	OK	27.729	19.1206	15.254	40.0055	24.9925	29.2765	29.9369	18.8816	8.05588	8.39793	12.1836	7.63209	7.34379	9.16684	11.5534	8.37409	18.5029	46.0389	1.3151	5.30684	5e-05	0.000553274	yes
Lancl1	chr1:67000516-67038889	WTLV	TGLV	OK	1.62122	1.03703	1.41682	1.23309	1.63434	1.18502	1.3558	1.41227	2.00526	1.13095	1.10222	1.55032	1.23343	1.54067	1.64578	1.27365	2.00346	1.79412	-0.159218	-0.513169	0.1419	0.343118	no
Erbb4	chr1:68031883-69110787	WTLV	TGLV	OK	0.978821	1.13949	0.658504	0.649392	1.03772	0.937779	0.868012	0.738482	0.708704	0.773515	0.64553	0.722235	0.866961	0.872447	0.686908	0.919281	1.0882	1.10064	0.0163929	0.0612906	0.8579	0.936085	no
Ikzf2	chr1:69531206-69687351	WTLV	TGLV	OK	0.563426	0.714345	0.534156	0.587719	0.52659	0.741196	0.578464	0.436093	0.51121	0.518184	0.643351	0.959138	0.499227	0.671546	0.752087	0.635079	0.871025	0.747611	-0.220426	-0.67557	0.0405	0.144474	no
Abca12	chr1:71243089-71414910	WTLV	TGLV	OK	0.730078	1.1473	0.856103	0.468314	0.706725	1.02042	1.15001	0.610416	0.744794	0.592758	0.471311	0.872872	0.731903	0.90343	0.585258	0.437337	1.05367	1.14235	0.116582	0.390683	0.2709	0.512143	no
Atic	chr1:71557155-71579403	WTLV	TGLV	OK	4.05721	2.66239	3.83777	3.32106	4.25834	3.75064	3.87713	4.58236	3.36768	3.27276	3.95824	3.4044	5.40258	4.14775	4.05011	3.80671	5.55242	4.92781	-0.17217	-0.65351	0.062	0.194484	no
Fn1	chr1:71585472-71653234	WTLV	TGLV	OK	7.91261	6.91739	7.71818	10.459	11.3947	7.69194	7.38712	10.7092	5.51159	4.52151	4.22012	4.62803	5.16898	4.88605	6.10847	4.9351	6.96075	10.9471	0.653238	3.64323	5e-05	0.000553274	yes
Mreg	chr1:72159232-72212307	WTLV	TGLV	OK	6.51694	6.028	5.57628	6.26049	6.91098	6.73271	6.18318	5.59743	4.78366	6.43344	6.38505	6.53233	6.06325	6.27522	5.0276	5.44043	7.6523	7.42666	-0.0431805	-0.180493	0.6005	0.791963	no
Pecr	chr1:72236010-72284314	WTLV	TGLV	OK	3.57454	2.95324	3.10782	3.39943	4.40661	2.71936	2.65817	1.8889	3.03829	3.3577	4.30759	2.82575	4.38928	2.84979	2.47926	3.47632	4.82128	4.45936	-0.112579	-0.269117	0.44385	0.680973	no
Xrcc5	chr1:72307416-72394953	WTLV	TGLV	OK	4.3181	3.20335	4.01588	4.19587	5.21455	5.17095	4.67213	3.51004	3.2952	3.4881	3.7265	4.70836	3.32044	3.87654	3.54117	3.73665	5.75906	5.82643	0.0167767	0.0654345	0.8494	0.93284	no
Smarcal1	chr1:72536690-72636790	WTLV	TGLV	OK	7.27938	5.11	5.57371	5.14827	5.63992	5.82854	6.56307	5.10229	3.74281	4.82371	4.39298	4.22257	4.99283	5.13479	3.67901	4.51794	6.27847	7.29	0.215505	0.858038	0.01525	0.0701642	no
Rpl37a	chr1:72711259-72713813	WTLV	TGLV	OK	37.9397	32.5199	39.8243	32.9986	35.1978	36.355	30.7677	32.9737	38.0729	35.172	33.4892	30.2199	39.0796	38.8448	30.507	33.5933	184.202	166.183	-0.148517	-0.840101	0.01595	0.0725106	no
Igfbp5	chr1:72858064-72874865	WTLV	TGLV	OK	19.7584	10.6511	15.0045	11.2189	19.4775	18.1457	18.3306	22.8158	10.966	11.8252	12.7097	12.0747	11.8448	12.4955	13.8422	10.8769	15.5489	19.971	0.361096	2.14401	5e-05	0.000553274	yes
Tns1	chr1:73910230-74124529	WTLV	TGLV	OK	72.9329	75.6726	66.041	70.5856	73.9062	71.5072	73.7758	71.8034	66.8355	65.3987	59.1695	64.4042	66.469	64.5925	64.0119	63.0185	83.1913	86.104	0.0496472	0.329421	0.3527	0.596695	no
Arpc2	chr1:74236504-74268213	WTLV	TGLV	OK	46.5678	33.3065	38.9738	42.0052	44.4784	43.083	45.5614	46.7101	37.9148	36.4427	35.7112	31.6902	43.9706	44.1425	35.473	36.3718	60.942	62.3526	0.0330128	0.189678	0.58925	0.785823	no
Aamp	chr1:74279839-74353692	WTLV	TGLV	OK	23.2003	20.0451	21.1925	19.7351	24.121	21.2607	24.7539	23.9833	19.6953	20.6516	21.2456	18.1619	21.5815	22.826	22.3076	20.7125	24.3097	23.723	-0.0352473	-0.131112	0.7098	0.860269	no
Pnkd	chr1:74279839-74353692	WTLV	TGLV	OK	30.7572	24.8558	30.7087	23.5983	29.0791	24.7101	28.6117	27.5599	25.2828	22.2062	19.4588	23.1761	26.9266	25.5748	23.06	20.7333	35.0875	36.9475	0.074519	0.187577	0.58725	0.785257	no
Tmbim1	chr1:74279839-74353692	WTLV	TGLV	OK	6.74175	5.57117	7.1077	6.59831	8.02768	6.44723	7.50641	7.71769	6.75515	6.88778	6.81282	6.86122	5.6425	7.36124	7.06478	6.65121	9.07934	8.68237	-0.0644982	-0.163914	0.63875	0.816487	no
Slc11a1	chr1:74375013-74386057	WTLV	TGLV	OK	1.01205	0.635685	0.799697	0.967137	0.823307	0.576973	0.71429	1.10066	0.282418	0.733734	0.456237	0.520972	0.568277	0.879538	0.508244	0.802594	0.931294	1.16027	0.317156	0.611027	0.07745	0.22756	no
Ctdsp1	chr1:74391608-74397285	WTLV	TGLV	OK	10.9989	8.86591	9.71647	9.8722	10.161	11.507	10.7365	10.8755	9.16504	10.7068	8.37823	10.274	9.98686	10.255	9.13193	9.7597	16.182	15.8238	-0.0322941	-0.167154	0.63745	0.815972	no
Usp37	chr1:74409383-74565977	WTLV	TGLV	OK	1.02608	0.916958	0.88481	1.09111	1.19022	1.16211	1.02887	1.08761	0.897934	0.714973	1.10429	0.858137	1.09311	0.934203	1.11964	0.896126	1.4067	1.45069	0.0444235	0.128307	0.71255	0.862161	no
Cnot9	chr1:74409383-74565977	WTLV	TGLV	OK	2.72204	2.33015	2.29413	2.24721	2.51096	2.46061	2.43858	3.12808	1.68044	2.04936	2.27268	2.88199	3.25934	2.53403	2.63313	2.80318	3.42957	3.21396	-0.0936785	-0.259407	0.4607	0.695992	no
Zfp142	chr1:74566422-74588073	WTLV	TGLV	OK	1.96019	1.56609	1.61803	1.60771	1.17873	1.59561	1.71863	1.68363	1.36697	1.27756	1.47089	1.83024	1.5838	1.50826	1.78567	1.55885	2.06906	1.97711	-0.0655774	-0.239577	0.48705	0.71578	no
Bcs1l	chr1:74588288-74592443	WTLV	TGLV	OK	4.3005	3.82221	4.29769	4.38478	5.21591	4.32193	3.86029	3.91651	2.93622	4.67954	3.73044	4.14803	3.4849	4.21553	4.91356	3.28127	5.38455	5.28361	-0.0273018	-0.0910309	0.7957	0.905029	no
Rnf25	chr1:74593747-74601397	WTLV	TGLV	OK	3.53572	1.94678	3.42053	2.9853	2.93761	4.06434	3.03035	2.93388	2.17817	2.57398	2.70995	2.45474	2.26277	3.32967	3.33766	2.49809	3.81757	4.15672	0.122791	0.331157	0.35305	0.596945	no
Ttll4	chr1:74661644-74701832	WTLV	TGLV	OK	0.888243	1.01564	1.11691	1.27618	1.31502	1.47746	1.24755	1.25845	0.935207	1.0158	1.40304	0.969265	1.64586	1.1281	0.735743	1.20115	1.68248	1.65131	-0.0269835	-0.0747982	0.8295	0.923205	no
Cyp27a1	chr1:74713145-74737897	WTLV	TGLV	OK	4.92031	3.16839	3.55159	4.12241	4.10341	4.30595	4.84465	3.22749	3.11922	4.52943	4.39034	3.44295	3.85091	3.66491	3.35453	3.91073	5.11137	4.99815	-0.0323149	-0.10861	0.75315	0.88348	no
Nhej1	chr1:74967345-75125226	WTLV	TGLV	OK	2.00024	2.39918	0.390921	1.34206	1.71826	1.51435	1.11502	1.43733	0.455125	1.51712	1.04917	0.622289	0.560237	1.90754	1.43996	0.578223	1.59638	1.95654	0.293493	0.463145	0.1929	0.419683	no
Cnppd1	chr1:75125540-75142733	WTLV	TGLV	OK	3.06735	3.17352	2.70272	3.08727	3.41555	3.32291	2.93531	2.85309	3.00553	2.72866	2.564	2.01574	2.87737	2.09605	3.10986	2.79147	3.62455	3.7937	0.065805	0.20215	0.5574	0.765317	no
Fam134a	chr1:75142785-75147909	WTLV	TGLV	OK	4.88566	2.56117	3.50731	4.17463	4.16303	4.19322	4.07881	4.85979	2.63222	3.14502	2.41145	3.22178	4.51511	2.98908	2.54958	2.60551	4.1035	5.03234	0.294376	1.04007	0.00325	0.0205255	yes
Zfand2b	chr1:75168645-75171626	WTLV	TGLV	OK	3.46091	4.42635	3.66445	2.75621	3.66063	4.87069	3.65824	3.24117	1.78271	3.42594	3.17057	2.15898	2.06814	1.79327	2.63229	1.93578	3.64626	4.98742	0.451876	1.142	0.00145	0.0107402	yes
Abcb6	chr1:75171639-75180392	WTLV	TGLV	OK	4.99694	4.37683	3.82405	4.18105	4.6254	4.51373	4.69907	3.9598	3.50326	3.10619	3.62761	3.10693	3.2759	3.7083	3.9621	3.4744	4.91764	5.60694	0.189248	0.739398	0.03705	0.135812	no
Atg9a	chr1:75180860-75192010	WTLV	TGLV	OK	8.85407	7.9749	7.29352	7.82625	8.2684	7.74287	7.72948	7.18798	7.08051	6.41021	6.30752	6.2046	7.0383	6.42675	6.32699	5.64804	8.63762	9.78509	0.179952	0.887205	0.01145	0.0563169	no
Ankzf1	chr1:75192159-75210816	WTLV	TGLV	OK	2.96098	2.33477	2.99336	4.14125	3.49861	2.3948	2.49722	2.87169	2.35725	2.83652	2.14201	2.70756	2.86299	2.14297	2.61719	2.93701	2.99453	3.24205	0.114579	0.21551	0.5286	0.744648	no
Glb1l	chr1:75192159-75210816	WTLV	TGLV	OK	0.18862	0.301457	0.143526	0.480175	0.212074	0.143564	0.056808	0.265139	0.316355	0.273655	0.215139	0.202262	0.130348	0.303001	0.127914	0.338359	1.05449	0.899942	-0.228635	-0.377893	0.2267	0.461317	no
Stk16	chr1:75210828-75219860	WTLV	TGLV	OK	6.37792	6.48056	6.493	6.20744	4.96612	6.78228	6.71764	6.66535	4.43016	5.19071	5.21677	4.85303	5.06845	5.53799	4.76147	3.8572	6.74553	8.16737	0.27594	0.383097	0.28135	0.524439	no
Tuba4a	chr1:75210828-75219860	WTLV	TGLV	OK	61.2585	69.92	66.986	47.2214	55.8891	60.3273	65.0682	59.6516	73.865	78.4471	79.4486	84.1986	87.3069	76.1013	73.6377	84.3171	102.473	72.4958	-0.499273	-3.05844	5e-05	0.000553274	yes
Dnajb2	chr1:75236402-75245692	WTLV	TGLV	OK	17.1366	12.7926	13.832	14.472	15.1972	14.462	17.0061	14.584	12.4398	10.9125	10.6399	13.041	12.885	11.2078	11.4254	12.0231	15.8461	18.2802	0.206149	0.984395	0.0049	0.0288082	yes
Dnpep	chr1:75308564-75317654	WTLV	TGLV	OK	9.66983	9.53009	9.43887	9.96505	11.8954	9.83591	11.6913	10.7893	11.2743	9.53568	9.58055	10.2726	13.1612	10.6769	9.24037	11.5663	14.5709	13.0375	-0.16042	-0.700334	0.045	0.155599	no
Des	chr1:75360291-75375015	WTLV	TGLV	OK	363.112	312.988	323.287	377.882	355.752	347.358	348.409	373.859	345.003	364.419	378.818	360.198	378.284	359.913	355.438	364.24	467.258	416.205	-0.166925	-1.08707	0.0021	0.0145951	yes
Speg	chr1:75375296-75432320	WTLV	TGLV	OK	17.1067	17.04	15.8404	17.5225	17.4132	16.109	17.9678	17.1125	15.432	13.9479	14.9824	15.4986	17.3228	15.2181	14.383	11.8643	19.6363	21.0015	0.0969702	0.417732	0.2361	0.471841	no
Gmppa	chr1:75435910-75443176	WTLV	TGLV	OK	4.72306	4.44845	3.67672	3.817	4.19693	3.88269	5.06991	4.22966	3.21202	3.06738	3.24707	2.34031	3.43559	3.90173	3.67911	3.31497	4.72746	5.77931	0.289832	0.916558	0.0075	0.0402347	yes
Chpf	chr1:75474568-75479471	WTLV	TGLV	OK	2.7055	2.13548	2.91805	3.13131	2.91568	2.28546	2.60696	3.20207	1.99453	1.83476	1.89212	1.80364	1.99139	1.77512	2.27228	2.34628	2.61503	3.27215	0.323411	1.07088	0.0023	0.0156721	yes
Obsl1	chr1:75485824-75506658	WTLV	TGLV	OK	6.58869	5.8797	5.37823	6.29189	5.97861	5.88291	7.31432	6.91894	6.54542	6.16198	6.42146	6.47313	7.44632	6.17659	6.54033	7.01228	8.76819	7.7054	-0.186409	-0.917156	0.0079	0.0419996	yes
Inha	chr1:75507076-75510366	WTLV	TGLV	OK	1.02803	0.572506	0.60497	0.567678	0.528502	0.927945	0.146991	0.365744	0.672001	0.656219	0.325272	0.987558	0.737172	0.749503	1.07844	0.660018	0.947667	0.725152	-0.386097	-0.538036	0.1298	0.324335	no
Stk11ip	chr1:75521528-75537335	WTLV	TGLV	OK	0.551127	0.881394	0.574455	0.986076	0.989904	0.732016	0.789998	1.00948	0.484883	0.98356	0.546035	0.702167	0.749759	0.784872	0.984532	0.743483	1.13981	1.15342	0.017121	0.0461638	0.89585	0.955653	no
Slc4a3	chr1:75545913-75559431	WTLV	TGLV	OK	30.769	28.5232	26.1993	25.1188	25.6841	32.4834	27.6385	25.5178	23.7105	24.9945	24.2727	24.4248	27.075	26.2051	25.5275	26.3546	33.4321	33.8455	0.0177314	0.107242	0.75915	0.887087	no
Epha4	chr1:77367181-77515103	WTLV	TGLV	OK	10.2422	6.94305	9.05513	7.10775	6.88711	8.37483	7.46416	7.69291	8.24735	7.98902	8.01092	8.80217	7.803	7.40023	8.62637	6.18666	10.4573	9.72972	-0.104036	-0.580794	0.10085	0.273739	no
Farsb	chr1:78310043-78488897	WTLV	TGLV	OK	7.56726	6.81343	6.30209	6.19833	7.24622	6.76132	6.47714	7.41482	8.18105	7.05788	7.10442	6.41533	7.72919	7.76187	7.6323	5.96252	9.95262	8.84826	-0.169684	-0.700963	0.04935	0.166219	no
Acsl3	chr1:78657824-78707743	WTLV	TGLV	OK	1.5235	0.969259	1.68149	0.894041	1.07108	1.28844	0.980333	1.32625	0.414189	0.986105	1.0754	1.04076	1.06277	0.439965	0.95177	0.677235	1.23836	1.66011	0.422846	0.897113	0.01245	0.0603076	no
Kcne4	chr1:78791622-79224511	WTLV	TGLV	OK	0.691651	0.267611	0.405522	0.95713	1.48536	0.523637	0.523253	0.818597	0.503599	0.43202	0.332553	0.368875	0.636511	0.342989	0.912842	0.314191	0.614757	0.831998	0.436564	0.73254	0.0397	0.142652	no
Wdfy1	chr1:79702261-79781445	WTLV	TGLV	OK	1.03764	0.847856	1.28771	1.88577	2.59464	2.15444	0.949569	1.26545	1.5224	2.09262	1.31189	1.14083	1.06285	0.603716	1.02189	1.2454	1.18208	1.25297	0.0840251	0.0817275	0.81105	0.91388	no
Mrpl44	chr1:79702261-79781445	WTLV	TGLV	OK	12.532	11.9838	12.7567	14.7593	12.7434	13.0045	12.6382	14.6067	11.8232	12.0485	11.9158	9.89744	11.1637	11.4731	9.62309	12.6321	15.7198	16.1025	0.0347038	0.13984	0.69145	0.849093	no
Serpine2	chr1:79794316-79858665	WTLV	TGLV	OK	12.2727	12.0495	13.5862	9.41408	13.8077	13.2498	13.1729	14.7333	5.61773	5.68578	5.64412	4.76366	7.39536	7.21148	7.69581	6.4852	8.58647	16.116	0.908359	3.99101	5e-05	0.000553274	yes
Cul3	chr1:80264922-80340690	WTLV	TGLV	OK	34.4192	30.8891	29.6882	29.4071	31.2686	30.8328	32.7347	33.2334	29.2484	27.8849	29.3068	30.3211	30.836	30.332	32.4705	30.7862	38.8235	37.5037	-0.0498973	-0.309501	0.3801	0.623088	no
Dock10	chr1:80501067-80758706	WTLV	TGLV	OK	0.560774	0.666578	0.54017	0.915018	0.854206	0.66469	0.530545	0.558943	0.500481	0.558218	0.408551	0.452085	0.58191	0.36242	0.409889	0.578769	0.868666	1.04408	0.265353	0.746909	0.02205	0.092329	no
Irs1	chr1:82233104-82291439	WTLV	TGLV	OK	4.26793	3.27454	4.63805	3.65141	4.58553	3.89376	3.1961	4.21165	4.22455	3.62799	4.44672	4.31198	4.15431	3.16846	5.01083	3.58868	5.25104	4.72497	-0.152296	-0.798039	0.02195	0.0920406	no
Rhbdd1	chr1:82316456-82445366	WTLV	TGLV	OK	2.17734	1.66492	1.31691	1.64582	1.92733	1.90303	2.37234	1.619	1.162	1.18144	1.73618	1.51314	1.18702	1.04619	2.27457	1.60126	2.01067	2.30167	0.195003	0.571606	0.09905	0.270529	no
Col4a4	chr1:82448418-82752390	WTLV	TGLV	OK	0.950052	0.629324	1.14921	1.0853	0.988333	1.58838	1.46974	0.975728	0.96647	0.406733	0.801091	0.928327	0.948127	0.754336	1.02257	0.96012	1.41389	1.60221	0.18039	0.312498	0.37665	0.619665	no
Mff	chr1:82448418-82752390	WTLV	TGLV	OK	31.5495	25.817	24.5691	25.1764	26.8428	28.8052	27.4925	29.9884	25.4765	24.4522	22.4339	25.4138	27.0597	25.2638	25.2972	22.0392	31.4762	32.7264	0.0561919	0.25062	0.47235	0.704256	no
Agfg1	chr1:82839459-82901001	WTLV	TGLV	OK	6.25209	6.55571	5.97678	5.70058	6.40338	7.1617	5.89972	5.24462	4.16697	4.17929	5.06496	6.57941	5.56371	5.63399	5.0839	5.60538	7.08966	7.82568	0.1425	0.457423	0.19195	0.418077	no
Pid1	chr1:84036292-84339845	WTLV	TGLV	OK	3.06628	1.99478	2.63471	2.46068	3.0887	2.54986	3.3354	2.54756	2.16524	1.58504	1.64472	2.01587	1.90379	2.27156	2.25814	2.50862	2.69422	3.2932	0.289622	0.889497	0.01085	0.0539717	no
Trip12	chr1:84721188-84900487	WTLV	TGLV	OK	19.1702	16.8895	16.6655	18.1483	18.8018	17.0136	18.4	17.836	16.3408	16.5435	17.9942	16.1199	18.0514	18.6454	18.5098	16.8371	23.0457	21.786	-0.0810947	-0.513762	0.14755	0.351322	no
Sp110	chr1:85570752-85645040	WTLV	TGLV	OK	1.60797	1.19698	0.924088	1.38557	1.74006	1.49551	1.39013	2.53127	0.919487	0.894185	1.12117	0.763924	0.709938	1.26935	1.19233	0.998516	1.20066	1.79281	0.578397	0.912401	0.0047	0.027826	yes
Sp140	chr1:85570752-85645040	WTLV	TGLV	OK	1.5919	1.40238	1.69724	1.98501	1.58475	1.48935	1.50334	1.59923	0.950823	1.32002	1.17187	1.07481	0.881173	1.12883	1.12122	1.48256	0.906193	1.29972	0.520316	0.680804	0.0357	0.132009	no
Sp100	chr1:85649943-85709998	WTLV	TGLV	OK	7.47277	7.84617	7.7022	9.66614	9.40318	7.51973	7.22365	7.43073	6.91854	6.07194	6.31677	6.26256	6.91037	6.20056	8.81855	6.30293	9.95199	10.318	0.0521022	0.207672	0.55725	0.765317	no
Cab39	chr1:85793407-85851577	WTLV	TGLV	OK	21.3882	19.8547	19.9735	21.1618	21.1049	21.1739	21.5367	21.7532	19.5261	18.6087	20.6635	18.6554	21.0248	19.5337	18.9793	18.1955	26.0184	25.9249	-0.00519632	-0.0305903	0.93015	0.970312	no
Itm2c	chr1:85894285-85908698	WTLV	TGLV	OK	12.6134	7.50548	8.89066	10.3321	12.568	11.2204	10.4943	11.9727	9.10094	9.70349	9.60822	7.13354	12.3293	9.82254	8.4284	9.57559	12.4106	13.1081	0.0788877	0.358103	0.312	0.557331	no
Psmd1	chr1:86064618-86139295	WTLV	TGLV	OK	34.0934	27.36	26.7816	25.4659	30.7599	29.4824	30.8573	31.5564	28.0316	26.3861	29.6105	27.4336	30.5473	27.6383	29.1922	26.9923	38.6786	37.3117	-0.0519084	-0.315429	0.36945	0.61319	no
Ncl	chr1:86344718-86359455	WTLV	TGLV	OK	41.5705	38.6545	37.1742	39.4597	43.1387	41.0897	40.6986	42.44	36.1426	37.823	37.6452	35.8971	39.338	40.8845	37.774	38.1704	56.152	55.4506	-0.0181359	-0.116678	0.7425	0.878918	no
Snora75	chr1:86344718-86359455	WTLV	TGLV	OK	0	0	36.1611	0	0	0	44.2037	0	0	16.5103	0	16.4467	14.8067	0	0	15.282	10.1328	14.5721	0.524181	0.659712	0.7145	0.862418	no
Gm24148	chr1:86344718-86359455	WTLV	TGLV	OK	19.5405	84.6781	61.1028	45.8874	67.1431	24.9158	31.1219	46.2539	56.9106	76.7197	75.1621	34.7381	31.2742	41.742	62.5201	58.1008	70.5137	57.245	-0.300754	-0.0887891	0.81165	0.914295	no
Snord82	chr1:86344718-86359455	WTLV	TGLV	OK	2244.33	2547.21	2777.95	2133.26	3505.33	2265.52	3812.82	2909.23	3132.06	3204.24	3531.58	2792.9	2035.47	2397.15	2872.3	3336.59	3756.31	3292.67	-0.190057	-0.0957555	0.82535	0.920696	no
Ptma	chr1:86526735-86530698	WTLV	TGLV	OK	34.2744	27.5575	31.449	33.1707	38.7055	31.046	33.7502	38.1225	27.6677	27.5605	31.1432	27.7702	30.5681	31.486	30.1078	26.8824	53.5854	56.4079	0.0740569	0.404325	0.24715	0.485154	no
Pde6d	chr1:86543012-86582808	WTLV	TGLV	OK	8.2859	5.7003	5.7655	6.14867	6.36187	6.55935	6.99765	6.87713	6.47804	6.52935	6.41272	4.92622	5.14893	6.48762	4.57874	4.80811	7.95193	8.26825	0.056278	0.176256	0.61055	0.798363	no
Cops7b	chr1:86582891-86606500	WTLV	TGLV	OK	1.80367	1.87924	1.45111	2.51266	1.51917	1.52646	1.62603	1.76097	1.18056	1.28717	1.55449	1.43305	1.9791	1.07465	1.33568	1.3515	1.95921	2.3506	0.262762	0.640664	0.06525	0.201894	no
Dis3l2	chr1:86703778-87050097	WTLV	TGLV	OK	2.31511	2.63393	1.85333	2.18661	2.31556	2.46219	1.82948	2.14535	1.94499	2.59816	2.27925	1.61461	1.34673	2.17151	1.90166	2.07392	2.99463	3.17644	0.0850326	0.284054	0.41595	0.656728	no
Eif4e2	chr1:87213900-87240488	WTLV	TGLV	OK	15.1201	8.01373	13.7303	13.4293	15.8174	14.4764	12.4048	9.99876	10.5792	11.9773	14.4453	8.75688	12.1172	11.0287	14.7034	14.7801	18.0339	17.0229	-0.0832378	-0.297084	0.39805	0.640791	no
Efhd1	chr1:87264308-87310839	WTLV	TGLV	OK	0.329729	0.45928	0.38134	0.654587	0.727836	1.14305	0.704201	1.23717	0.360119	0.745324	0.432374	0.568978	0.788937	0.560935	0.435177	0.647758	0.781472	0.878541	0.168916	0.25965	0.45785	0.693458	no
Gigyf2	chr1:87326980-87450810	WTLV	TGLV	OK	7.44373	6.38954	7.15348	6.76157	7.27249	7.48475	6.65537	6.57771	6.13591	5.78721	6.44025	7.02502	6.30259	7.45162	7.1757	6.54965	8.88373	8.7599	-0.0202503	-0.107164	0.7605	0.887788	no
Inpp5d	chr1:87620311-87724892	WTLV	TGLV	OK	1.27204	1.02946	1.06026	1.9341	1.0928	1.12278	1.21691	1.63055	0.724214	1.05952	0.997593	0.827389	1.09568	1.03275	1.18419	1.00072	1.49247	1.79726	0.268094	0.727128	0.03595	0.132726	no
Atg16l1	chr1:87756005-87792428	WTLV	TGLV	OK	7.85599	7.17303	6.20926	6.96686	5.55434	5.98198	5.33377	4.82145	5.78238	7.51098	7.75256	5.60659	6.64094	6.92462	5.69381	6.27102	8.96094	7.86491	-0.188221	-0.534714	0.1317	0.327354	no
Scarna6	chr1:87756005-87792428	WTLV	TGLV	OK	29.8584	24.6458	55.7608	35.6151	31.0899	39.1297	31.7035	43.7526	33.8182	43.8132	41.7636	36.5668	37.1684	32.3977	33.9671	44.9379	48.9784	43.4627	-0.172367	-0.219005	0.5237	0.742252	no
Dgkd	chr1:87853272-88008578	WTLV	TGLV	OK	5.22787	4.29055	4.91563	4.41004	4.94882	4.98447	5.45757	4.44757	4.13687	4.0477	3.52721	3.90486	4.05986	4.35055	4.43029	4.09819	5.78641	6.25758	0.112938	0.44401	0.208	0.437877	no
Usp40	chr1:87853272-88008578	WTLV	TGLV	OK	3.67905	3.0662	3.1378	3.04533	3.85698	4.05008	3.40922	2.92577	3.2596	3.20054	2.80766	3.67696	3.64936	3.54804	3.54634	3.47447	4.76659	4.54602	-0.0683531	-0.206132	0.55835	0.765418	no
Hjurp	chr1:88226990-88277633	WTLV	TGLV	OK	2.02579	2.03109	2.13065	2.80961	2.33484	2.06178	2.28621	2.01833	1.39966	1.67718	1.60165	1.59251	1.8503	1.31519	1.94226	1.95004	2.28386	2.79846	0.293163	0.990533	0.00535	0.0309917	yes
Arl4c	chr1:88698224-88702191	WTLV	TGLV	OK	1.33254	1.01242	1.11612	1.14952	1.45958	1.85357	1.09148	1.26403	1.37976	0.815347	1.41604	1.07063	1.13006	1.17242	0.913605	1.23495	1.46966	1.52032	0.0488978	0.139007	0.69665	0.851898	no
Sh3bp4	chr1:89070461-89155068	WTLV	TGLV	OK	2.31358	1.98637	2.26295	2.04646	2.02246	1.95602	1.69161	2.03106	2.63975	2.54879	1.78013	1.86749	2.15537	1.94991	1.99257	2.24726	2.94127	2.53949	-0.2119	-0.709131	0.04435	0.154344	no
Agap1	chr1:89454810-89895282	WTLV	TGLV	OK	4.2236	3.12399	3.77967	3.58293	4.41675	4.59713	4.08838	4.43974	3.75919	3.28034	3.57825	3.74934	3.92246	3.81586	3.58362	3.67692	4.91978	5.02266	0.0298565	0.156233	0.6582	0.828546	no
Asb18	chr1:89952294-90014666	WTLV	TGLV	OK	4.93114	3.2115	4.80223	4.86182	5.71497	6.36133	4.74529	4.4707	3.65009	4.95258	4.38044	5.29869	6.02113	3.41661	5.62228	4.59795	6.33172	6.02938	-0.0705893	-0.226999	0.5168	0.738134	no
Ackr3	chr1:90203979-90215724	WTLV	TGLV	OK	16.3997	11.1756	16.8722	16.7379	16.3716	13.6855	14.6176	21.6745	14.4287	15.9992	16.1584	14.6125	15.6093	14.7593	13.3868	13.2686	19.0772	18.9402	-0.0104043	-0.0516822	0.88215	0.947996	no
Cops8	chr1:90603424-90613341	WTLV	TGLV	OK	16.7969	15.3763	11.5943	13.5878	15.2569	13.9745	13.8884	14.5423	14.6153	15.4771	15.3712	14.9939	16.5112	14.7233	15.1697	15.8606	20.2567	17.5659	-0.205619	-0.997918	0.0051	0.029821	yes
Col6a3	chr1:90766859-90843971	WTLV	TGLV	OK	4.82045	4.01675	4.46278	5.25928	5.9094	5.02461	4.54102	4.42531	2.76768	2.06662	3.15566	2.94061	3.17142	2.59065	3.67425	2.90339	4.02204	5.93412	0.561107	2.90141	5e-05	0.000553274	yes
Lrrfip1	chr1:90998427-91128944	WTLV	TGLV	OK	18.2431	14.8487	17.8456	17.4298	20.6856	15.1243	16.8473	20.8011	15.8717	18.4157	18.7168	17.5268	18.541	17.8103	19.7756	20.2213	24.226	21.7568	-0.155092	-0.791088	0.02225	0.0928378	no
Ramp1	chr1:91179821-91225196	WTLV	TGLV	OK	1.29336	0.311155	1.03404	0.423316	1.70797	0.459634	0.644702	0.913372	2.08801	3.10522	1.37916	1.74131	0.864872	1.52592	1.67562	2.0855	2.54783	1.01478	-1.32811	-1.52188	0.0001	0.00103854	yes
Ube2f	chr1:91249689-91286520	WTLV	TGLV	OK	8.88187	5.54852	5.78438	5.55554	6.34182	5.05745	5.60968	6.49923	4.17468	5.49667	7.10307	7.17772	5.26265	6.07205	6.00573	4.68108	11.2832	10.7507	-0.0697453	-0.261694	0.45095	0.687143	no
Scly	chr1:91298294-91321080	WTLV	TGLV	OK	3.72643	2.8142	3.12492	3.20544	2.5278	2.17556	2.88828	3.23096	2.12965	2.44332	2.3865	2.15292	2.77755	3.46332	2.46436	2.09369	3.57298	3.83896	0.103589	0.322785	0.35195	0.596107	no
Klhl30	chr1:91351072-91362404	WTLV	TGLV	OK	6.58976	5.08864	6.53429	5.56165	6.26206	5.83754	5.74488	6.99	4.59606	5.0755	6.16099	5.40121	6.19485	5.50376	6.3696	5.27082	7.36497	7.28917	-0.0149261	-0.0656282	0.8507	0.933017	no
Ilkap	chr1:91366160-91398842	WTLV	TGLV	OK	15.3266	15.1065	14.2592	12.1943	16.2347	16.6307	14.8663	15.5187	16.1115	15.4914	13.2041	14.3724	15.7227	14.9987	14.3421	13.9577	19.306	18.2882	-0.0781412	-0.34214	0.3239	0.569388	no
Hes6	chr1:91411481-91413877	WTLV	TGLV	OK	4.73139	4.16505	4.58464	3.64611	4.58156	3.90296	3.13122	3.32234	3.20332	4.98366	3.97926	3.61648	3.26866	2.47312	3.14481	3.98624	4.70155	4.94313	0.0722875	0.202894	0.5658	0.770545	no
Per2	chr1:91415976-91459402	WTLV	TGLV	OK	0.490561	2.05075	0.244038	1.12875	0.650122	0.727488	3.58251	0.411415	1.2123	1.02761	0.67925	0.443983	0.655087	0.889181	0.366497	0.985537	1.13764	1.51514	0.413407	1.21403	0.0007	0.00575021	yes
Traf3ip1	chr1:91494589-91529307	WTLV	TGLV	OK	2.37256	2.29269	2.10488	1.77438	2.21157	2.71311	1.86517	3.61854	1.71569	1.58999	1.35624	2.63309	1.96279	1.5739	2.59972	2.03497	2.86194	3.22987	0.174481	0.499831	0.1503	0.356007	no
Asb1	chr1:91539454-91559590	WTLV	TGLV	OK	1.49079	1.29844	1.44357	1.47764	1.82048	1.37698	1.51098	1.85237	1.36916	1.30333	0.971514	0.985683	1.17001	1.28608	1.27997	1.28731	1.5734	1.83985	0.225704	0.780878	0.0252	0.102191	no
Hdac4	chr1:91928778-92195670	WTLV	TGLV	OK	3.04852	3.35938	2.10599	2.27642	3.1901	3.80918	4.71407	3.01045	3.55179	3.2498	2.50162	2.52553	2.88588	2.39742	2.86025	2.37333	3.8679	4.01036	0.0521811	0.251198	0.4737	0.705362	no
Gm35992	chr1:92379556-92393620	WTLV	TGLV	OK	0.406104	0.912539	0.467123	0.377532	0.446676	0.280382	0.566354	0.102994	1.42453	1.26903	1.86518	1.16644	1.35253	1.95191	0.67444	1.39229	1.84828	0.535426	-1.78742	-1.67019	0.0001	0.00103854	yes
Ndufa10	chr1:92439707-92473758	WTLV	TGLV	OK	311.25	276.424	261.535	279.747	275.901	277.879	293.194	271.526	282.046	283.652	293.338	303.111	308.603	287.862	295.437	301.697	379.82	334.671	-0.182571	-1.20801	0.00075	0.00610582	yes
Myeov2	chr1:92637144-92641985	WTLV	TGLV	OK	78.2194	65.3197	69.5618	58.9718	69.0271	64.2816	68.6726	70.6898	67.4675	63.4827	63.6435	54.9831	64.0984	64.5252	61.1511	57.0261	79.7972	80.8703	0.0192726	0.082838	0.80845	0.912454	no
Gpc1	chr1:92831685-92860211	WTLV	TGLV	OK	68.561	56.98	55.8635	57.2082	64.8036	64.5187	62.5837	65.8508	55.4716	59.549	54.3362	55.7596	60.2163	56.8313	54.8908	52.1909	72.1725	73.534	0.0269631	0.175485	0.6146	0.80129	no
Dusp28	chr1:92906988-92910689	WTLV	TGLV	OK	3.08386	3.84952	3.73475	3.20298	3.64795	3.90664	2.84521	2.82074	1.98772	3.13973	3.44601	3.66687	3.30122	3.00682	3.4926	2.25477	3.94061	4.03195	0.0330582	0.0868113	0.80265	0.909083	no
Rnpepl1	chr1:92910802-92920585	WTLV	TGLV	OK	8.03632	7.20605	6.67537	8.77184	7.49459	7.42188	8.50641	7.35794	8.24102	6.86452	6.2536	6.82669	7.26221	8.01987	7.43787	7.98889	9.8246	9.40833	-0.06246	-0.294229	0.4028	0.644317	no
Capn10	chr1:92933525-92950590	WTLV	TGLV	OK	0.912545	0.547675	0.828322	0.735438	0.518724	0.370092	0.675033	0.518919	0.331574	0.595486	0.613264	0.415706	0.81868	0.427502	0.325753	0.633704	0.83766	0.895038	0.0955848	0.18754	0.59685	0.789989	no
Sned1	chr1:93235815-93301065	WTLV	TGLV	OK	1.28489	1.30294	1.20554	0.963139	1.28442	1.52941	1.079	1.08363	1.18006	0.939097	0.875453	1.43376	1.54462	1.25899	1.34231	1.06778	1.67384	1.58598	-0.0777889	-0.253687	0.46445	0.698624	no
Mterf4	chr1:93301204-93305879	WTLV	TGLV	OK	4.67959	4.07722	3.92922	4.36078	6.06365	5.85638	5.63125	6.4469	4.54301	4.57776	4.72724	3.94392	6.49097	3.70239	5.26807	3.77912	6.16134	6.22619	0.0151058	0.0465082	0.8963	0.955854	no
Ppp1r7	chr1:93343644-93367622	WTLV	TGLV	OK	4.38836	4.26118	3.99588	4.28369	4.75967	4.72858	3.97525	4.67435	3.59012	4.59712	4.01354	3.88163	4.37503	4.32477	3.65557	4.8427	5.68629	5.40553	-0.0730518	-0.312903	0.37435	0.61776	no
Hdlbp	chr1:93405939-93478917	WTLV	TGLV	OK	113.896	100.979	98.1101	101.467	104.537	105.39	112.664	105.634	105.293	103.606	94.3587	109.058	112.478	110.582	105.015	107.066	136.457	125.204	-0.124176	-0.818642	0.0208	0.0881559	no
2019-09-02	chr1:93478967-93509733	WTLV	TGLV	OK	21.0349	15.6379	15.8335	15.3712	19.3208	17.37	18.1305	17.6002	18.2604	17.4182	17.2746	18.4185	20.178	20.1108	18.8388	17.1731	24.9626	21.826	-0.193724	-1.10292	0.0017	0.0122692	yes
Farp2	chr1:93512103-93654216	WTLV	TGLV	OK	4.05433	3.80876	4.10139	2.78399	3.63123	3.13363	2.97416	3.91462	3.63536	2.4447	4.04014	3.60272	4.80049	3.64169	3.70022	3.98158	4.79392	4.20103	-0.19046	-0.519157	0.1444	0.346542	no
Stk25	chr1:93512103-93654216	WTLV	TGLV	OK	12.3143	9.15571	9.62522	11.7861	11.2001	12.1518	11.5585	11.4946	11.9135	11.6903	10.0342	10.3676	11.9948	11.5095	11.747	12.4704	14.9085	13.6426	-0.128013	-0.482149	0.1727	0.389379	no
Bok	chr1:93685574-93695770	WTLV	TGLV	OK	0.81636	0.267555	0.844658	0.531626	1.44005	0.321464	0.780125	0.876882	1.10139	0.2571	0.201504	0.512218	0.507256	0.395673	0.599214	0.333162	0.763565	0.925775	0.277911	0.395414	0.2532	0.492146	no
Thap4	chr1:93705390-93754838	WTLV	TGLV	OK	11.4624	10.4565	8.0894	12.2398	10.7962	6.45567	11.4244	9.539	10.2958	10.1876	8.87927	10.5896	8.86191	8.76632	9.4916	7.57044	12.6252	12.5074	-0.0135265	-0.0323703	0.9231	0.968113	no
Atg4b	chr1:93755032-93789529	WTLV	TGLV	OK	2.28831	1.3801	2.0194	2.1843	2.30591	2.26473	2.54744	2.65645	2.06121	2.29871	2.01694	2.71762	2.01621	1.92218	2.03794	2.56107	3.23373	2.96837	-0.123529	-0.411543	0.24555	0.482975	no
Dtymk	chr1:93792575-93801934	WTLV	TGLV	OK	4.19478	2.79435	3.52866	4.48004	4.03816	2.9243	4.01253	4.04643	4.63468	2.00388	3.15818	4.23325	3.59858	2.97687	4.26692	4.89522	5.12281	4.61015	-0.152123	-0.336334	0.3441	0.588032	no
Ing5	chr1:93803591-93822101	WTLV	TGLV	OK	1.51707	1.39487	1.81429	1.08832	2.34481	1.79586	1.62201	1.71983	1.72251	1.73489	1.51295	1.90691	1.79013	1.62262	1.74483	1.42941	2.4307	2.16524	-0.166846	-0.583338	0.1001	0.272767	no
D2hgdh	chr1:93824807-93853857	WTLV	TGLV	OK	3.09339	2.27677	3.10405	2.41671	4.14898	2.53061	3.00191	3.24658	3.84103	3.52518	2.99716	2.64359	2.51776	1.91414	3.10304	3.86544	4.6581	4.09766	-0.184942	-0.668736	0.05745	0.184367	no
Gm7889	chr1:93967805-93985871	WTLV	TGLV	OK	2.33011	2.30799	1.90562	1.7558	1.64609	1.79408	2.03256	1.83044	3.05384	2.80211	2.68255	3.13544	2.35233	2.68021	2.42008	2.46337	1.27407	0.627505	-1.02174	-1.22236	0.00155	0.011374	yes
Fam174a	chr1:95313627-95335284	WTLV	TGLV	OK	8.07242	7.94073	8.54335	9.12259	8.78287	8.27586	8.0083	9.12607	6.38818	8.6804	8.18122	8.13615	8.40879	9.11268	8.66765	7.72951	10.526	10.1556	-0.0516813	-0.224448	0.51985	0.740238	no
St8sia4	chr1:95587681-95667612	WTLV	TGLV	OK	1.97984	2.88919	2.72916	3.06069	4.04681	3.06374	1.9445	3.04549	1.6336	1.82043	2.22559	1.97307	2.20085	2.47844	3.11626	2.65065	2.9297	3.28751	0.166242	0.43771	0.2179	0.450486	no
D1Ertd622e	chr1:97643901-97662018	WTLV	TGLV	OK	0.540453	0.208829	0.434179	0.400021	0.601944	0.587603	0.613854	0.364986	0.477204	0.766051	0.727742	0.479607	0.703259	0.994282	0.406924	0.405986	0.846558	0.57784	-0.550939	-0.920509	0.006	0.0339751	yes
Ppip5k2	chr1:97706042-97793709	WTLV	TGLV	OK	25.726	23.8329	18.4639	19.8384	21.1113	22.8599	23.3671	19.7057	18.911	19.8818	16.9383	18.5458	19.1667	19.6237	20.3255	18.3968	25.0694	26.7099	0.091447	0.556572	0.1135	0.297231	no
Gin1	chr1:97706042-97793709	WTLV	TGLV	OK	1.51351	1.29757	1.76867	1.60885	1.39395	1.19689	2.14162	1.19336	1.4929	1.22643	0.848264	2.34759	2.21243	1.77609	1.13844	1.78349	2.25614	2.04412	-0.142375	-0.125145	0.7196	0.8662	no
Pam	chr1:97821090-98095658	WTLV	TGLV	OK	175.228	136.536	139.681	193.365	182.126	149.583	158.828	160.811	84.3255	79.8795	102.282	87.4733	90.9084	95.2926	96.6956	91.1441	117.222	192.234	0.713624	4.71639	5e-05	0.000553274	yes
Gm7967	chr1:98589522-98765080	WTLV	TGLV	OK	0.567221	0	0	0	0.265747	0.542411	0	0	0.309716	0	0.547385	1.51257	0.817043	0.955416	1.08887	1.68655	1.19479	0.248946	-2.26285	-1.05844	0.1498	0.355249	no
Pign	chr1:105518420-105663726	WTLV	TGLV	OK	1.03264	1.13818	0.638238	0.986254	1.22436	1.31853	1.1716	0.730473	1.54669	0.841321	0.798835	0.936187	0.522821	0.863907	0.940515	0.861753	1.48011	1.62713	0.136621	0.276712	0.41955	0.659428	no
2310035C23Rik	chr1:105663840-105755131	WTLV	TGLV	OK	2.86721	2.02778	2.1346	2.33372	2.73014	2.5982	2.3663	2.1593	2.42652	2.07993	2.21678	2.26197	2.04085	2.20281	2.30735	2.24653	3.16118	3.13894	-0.010186	-0.0409284	0.9042	0.958919	no
Zcchc2	chr1:105990405-106034077	WTLV	TGLV	OK	1.91908	1.87629	1.63354	1.87095	1.64739	1.70723	1.95184	1.95644	1.24326	1.49129	1.30981	1.70289	1.91613	1.21824	1.52537	1.73	2.08303	2.28871	0.135849	0.506408	0.14605	0.349227	no
Phlpp1	chr1:106171868-106394245	WTLV	TGLV	OK	3.24557	3.22911	3.02912	2.72202	3.39322	3.16713	3.3547	3.60609	3.74968	3.34526	3.03415	3.35592	3.81635	3.78998	3.43316	3.80758	4.80427	3.98055	-0.271348	-1.26416	0.0003	0.00278329	yes
Bcl2	chr1:106538175-106714290	WTLV	TGLV	OK	1.00423	0.794396	0.774147	1.04811	1.06425	0.835869	1.12848	1.09421	0.86321	1.06535	1.60742	1.31911	1.08043	1.17856	0.910363	0.829423	1.43413	1.15104	-0.317242	-0.933465	0.00775	0.0413322	yes
Kdsr	chr1:106720409-106759742	WTLV	TGLV	OK	2.42723	1.35192	2.37252	1.67985	2.35042	1.27552	2.7838	1.82611	1.14804	1.29892	2.25134	2.93464	1.98414	2.1481	2.07842	2.40619	4.05255	3.72832	-0.120306	-0.210348	0.55285	0.762465	no
Vps4b	chr1:106770787-106796725	WTLV	TGLV	OK	4.22354	3.63621	3.74556	3.09722	3.40106	4.08978	3.35664	3.99396	3.22202	3.71571	3.54008	2.78453	3.65839	3.48779	3.59562	3.36565	6.17215	6.20718	0.00816466	0.0350943	0.9177	0.966219	no
Serpinb8	chr1:107589925-107611795	WTLV	TGLV	OK	0.744789	0.562703	0.319394	0.614656	0.618533	0.627961	1.00671	0.965443	0.658785	0.685318	0.336482	0.448384	0.205688	0.238477	0.813076	0.583353	0.731782	0.826025	0.174772	0.188486	0.55975	0.766086	no
D830032E09Rik	chr1:107917258-107950947	WTLV	TGLV	OK	0.839946	0.749974	0.762877	0.827782	1.03056	1.47455	0.752584	1.11563	1.2341	1.24659	1.40237	0.723635	0.920673	1.2847	0.806226	1.49432	1.52622	1.15074	-0.407407	-0.846354	0.017	0.0758269	no
Cdh19	chr1:110888001-110977593	WTLV	TGLV	OK	0.704632	1.06699	0.673191	0.738585	0.794464	0.930901	0.923184	0.71989	0.817433	0.782683	0.88057	0.504811	0.41914	0.836053	0.991165	1.00582	1.20298	1.08992	-0.142385	-0.308549	0.3749	0.618072	no
Dsel	chr1:111858700-111864969	WTLV	TGLV	OK	0.890508	0.55517	0.631049	0.869566	0.784365	0.892173	0.802926	1.06972	0.558213	0.691382	0.638298	0.584112	0.608562	0.898067	0.483578	0.801278	0.865576	0.998668	0.206344	0.561106	0.1077	0.286224	no
Tsn	chr1:118298516-118311132	WTLV	TGLV	OK	5.73975	4.26395	5.19598	4.29781	4.89473	4.50099	4.32217	5.06581	4.34217	4.54805	4.02218	3.96726	4.62993	3.93058	4.45154	4.14142	5.62723	5.8043	0.0446977	0.183589	0.60235	0.792922	no
Nifk	chr1:118321842-118333831	WTLV	TGLV	OK	4.2363	3.86231	3.16118	4.03096	5.70224	4.05124	3.79065	4.49292	3.99583	4.08253	5.65606	4.60081	4.54885	5.28868	3.62265	5.15292	6.18584	5.38612	-0.199721	-0.695899	0.04845	0.163888	no
Clasp1	chr1:118389057-118609462	WTLV	TGLV	OK	48.4666	37.1398	42.7717	35.3665	46.4247	43.5251	37.6212	45.2423	43.9008	41.362	46.5461	48.4061	46.2146	43.4298	45.3069	40.6725	58.109	50.7943	-0.194096	-1.26159	0.0004	0.00354693	yes
2900060B14Rik	chr1:118389057-118609462	WTLV	TGLV	OK	12.0492	19.7721	24.5807	19.4357	21.9643	20.3622	13.7226	17.9166	26.68	26.1575	26.319	18.6622	16.3258	28.2578	26.2995	31.2459	32.1995	22.3718	-0.525353	-0.49424	0.16255	0.374086	no
Ralb	chr1:119470304-119504782	WTLV	TGLV	OK	9.13498	7.08135	5.67767	7.53714	7.02616	6.6439	6.8096	6.14313	6.08421	6.37676	7.04192	4.85434	6.18362	7.14847	7.16866	6.58046	8.38599	8.44769	0.0105751	0.0432524	0.9041	0.958899	no
Tmem185b	chr1:119526153-119528983	WTLV	TGLV	OK	0.942166	1.10513	1.42461	0.948218	0.882921	0.877296	1.08989	1.23247	1.05608	1.0354	1.32649	0.740498	0.976179	0.885258	0.856745	1.05667	1.27691	1.26935	-0.00856555	-0.0198463	0.95735	0.981428	no
Epb41l5	chr1:119545031-119649138	WTLV	TGLV	OK	0.702354	0.760246	0.620054	0.752833	0.73681	0.870706	0.874511	0.509031	0.675564	0.674121	0.60893	0.64473	0.515765	0.862444	0.692136	0.600275	1.05687	1.0082	-0.0680058	-0.151177	0.66385	0.832822	no
Ptpn4	chr1:119652466-119837542	WTLV	TGLV	OK	4.17125	3.72803	4.51138	4.23759	3.92737	3.6348	3.54517	4.21573	3.77391	3.93756	5.12379	4.91827	4.62947	4.34881	5.67863	4.54698	6.3682	5.15727	-0.304278	-1.27269	0.0003	0.00278329	yes
Tmem177	chr1:119906899-119918513	WTLV	TGLV	OK	1.42971	1.36668	1.50393	1.84094	1.22159	1.54822	1.2457	1.06646	0.895559	1.48588	0.926363	1.50258	1.47389	1.48215	1.04942	1.66708	1.6963	1.67563	-0.0176819	-0.0489397	0.8884	0.95229	no
Tmem37	chr1:120067376-120074069	WTLV	TGLV	OK	1.83926	2.59903	2.81315	1.04626	1.7236	1.52949	4.0896	1.86586	0.43669	0.171254	0.251667	2.98542	2.61093	2.19633	1.35599	0.396287	1.70985	2.62331	0.61752	1.03956	0.00365	0.0225933	yes
Dbi	chr1:120113279-120121096	WTLV	TGLV	OK	130.866	85.2328	95.0078	83.8542	108.233	99.465	102.034	112.76	102.281	115.872	110.755	104.169	110.8	86.8217	107.282	104.22	136.681	122.239	-0.161111	-0.862866	0.01435	0.0670933	no
3110009E18Rik	chr1:120121114-120188190	WTLV	TGLV	OK	1.1171	0.801903	1.29863	0.445806	1.24629	0.212124	0.771728	0.961386	0.483227	0.236831	0.231876	0	1.27592	1.00643	0.212641	0.879378	1.14447	1.30479	0.189133	0.137016	0.68045	0.842805	no
Steap3	chr1:120226413-120271082	WTLV	TGLV	OK	4.25033	5.93499	5.53598	4.39144	5.66913	5.02504	6.04945	5.30687	2.98269	3.93475	3.11351	4.71096	3.56438	3.68593	4.19124	3.92081	4.97912	6.35407	0.351792	1.38935	0.0001	0.00103854	yes
Insig2	chr1:121304352-121332589	WTLV	TGLV	OK	6.32291	6.08443	6.5835	7.17112	6.22155	6.2373	7.22456	7.07528	5.82603	6.70111	7.34228	6.55208	6.59058	7.10203	5.42061	6.57651	8.45321	7.8749	-0.102238	-0.436965	0.20905	0.439462	no
Ccdc93	chr1:121431066-121506460	WTLV	TGLV	OK	2.60929	2.32864	2.2853	2.7332	2.75682	2.32306	3.07707	3.0968	1.59386	1.53298	1.97221	1.85751	1.93843	2.10132	2.23478	1.84958	2.6996	3.3821	0.325171	1.44292	5e-05	0.000553274	yes
Ddx18	chr1:121553834-121567980	WTLV	TGLV	OK	1.78734	2.19601	2.07164	2.48817	2.6549	2.26789	2.30678	2.22644	1.39064	2.5223	2.38	2.18435	2.2875	1.91126	1.67029	2.31099	3.37905	2.95024	-0.195781	-0.587604	0.0966	0.265246	no
Actr3	chr1:125392904-125435727	WTLV	TGLV	OK	14.2825	11.135	14.1533	11.9036	15.3985	12.3679	13.9237	15.3808	11.7477	13.8056	11.7106	12.2428	13.1218	13.1749	11.6463	11.5642	22.6457	23.7718	0.0700155	0.381295	0.27775	0.520188	no
Slc35f5	chr1:125560410-125595823	WTLV	TGLV	OK	15.2908	10.8113	12.9903	15.5633	12.1955	13.1058	12.4698	12.5071	16.6568	17.1338	16.8385	17.0317	19.5346	19.4977	13.604	16.6107	23.3387	16.823	-0.472292	-2.50109	5e-05	0.000553274	yes
Nckap5	chr1:125913635-126830900	WTLV	TGLV	OK	1.42601	1.41507	1.28712	1.02137	1.45952	1.19309	1.25228	1.25755	1.26095	1.15598	1.3633	1.36388	1.47961	1.14154	0.928846	1.71288	2.14902	1.88476	-0.189292	-0.511616	0.1324	0.328294	no
Mgat5	chr1:127204972-127488334	WTLV	TGLV	OK	2.68493	2.78854	2.59521	2.53151	2.92226	2.21538	1.81418	3.64519	1.90353	2.93937	3.48426	3.2801	3.99445	3.09821	2.90736	3.55249	4.62867	3.52304	-0.393775	-1.16726	0.00085	0.00679828	yes
Gm8451	chr1:127204972-127488334	WTLV	TGLV	OK	52.2596	46.1807	46.9527	44.859	49.9474	52.3763	44.8836	53.5558	47.4209	44.505	42.8157	44.639	53.7895	49.0797	43.7292	44.1904	2.14091	2.34831	0.133397	0.0947739	0.7802	0.898898	no
2900009J06Rik	chr1:127693610-127774054	WTLV	TGLV	OK	0.248936	1.61156	1.44429	1.25267	0.466565	1.90449	0.470499	0	1.3594	0.266555	0.78343	0.796583	0.717151	0.455805	0.238942	0.246725	0.742491	1.289	0.795804	0.500173	0.1891	0.413698	no
Ccnt2	chr1:127774163-127804837	WTLV	TGLV	OK	5.6658	4.66755	4.24467	4.30635	4.64584	4.06372	3.70355	3.89171	4.29723	3.43365	3.77669	3.73518	5.1102	4.08843	3.7011	4.62107	5.40183	5.35556	-0.0124108	-0.0523181	0.87895	0.946212	no
Rab3gap1	chr1:127868736-127943876	WTLV	TGLV	OK	12.5745	10.5877	10.4877	10.8233	12.5863	13.9706	11.3858	12.1132	10.8546	10.0955	10.2837	10.0713	11.4956	11.6935	10.194	12.3397	14.1686	14.5032	0.0336687	0.172111	0.6235	0.807023	no
R3hdm1	chr1:128103292-128237738	WTLV	TGLV	OK	10.687	9.69876	9.41325	10.6945	10.7747	11.2721	10.9278	10.8722	9.57913	9.8287	9.29565	10.378	8.6917	10.0942	9.63384	8.0254	12.9335	13.3264	0.0431752	0.23151	0.5129	0.735673	no
Ubxn4	chr1:128243897-128279378	WTLV	TGLV	OK	16.7777	13.2071	13.9693	16.1081	16.4918	16.4906	16.1368	18.3247	14.2732	12.1778	14.1597	13.5623	15.8661	13.9449	11.7872	14.4413	17.9884	19.4645	0.11378	0.64332	0.06825	0.208451	no
Mcm6	chr1:128331574-128359705	WTLV	TGLV	OK	1.13112	0.985076	0.912219	1.23528	1.08248	1.409	0.540657	1.10008	1.54447	1.33784	1.2609	1.1313	1.24449	1.01416	0.85984	1.51839	2.02403	1.5258	-0.407666	-1.07714	0.00225	0.0154113	yes
Dars	chr1:128363706-128417416	WTLV	TGLV	OK	14.2122	14.3372	15.0935	14.2768	16.4121	16.2881	13.9064	13.9565	16.4768	16.1008	16.7172	17.6327	18.4421	17.4374	16.1742	15.2387	22.187	18.7683	-0.241418	-0.988219	0.00555	0.0319625	yes
Cxcr4	chr1:128588198-128592311	WTLV	TGLV	OK	0.852914	0.91082	1.00014	0.643793	1.03907	0.927673	0.811215	0.866785	0.838372	1.55825	0.536841	1.2073	1.35143	1.21027	0.941476	1.18348	1.43715	1.05311	-0.448551	-0.813164	0.01915	0.0829156	no
Cd55	chr1:130388525-130463021	WTLV	TGLV	OK	4.24705	3.34176	2.72473	4.11213	4.64103	3.5947	3.74747	4.51365	3.19595	2.59607	2.5437	1.75873	2.58747	2.3707	2.47068	2.60053	3.42104	4.66817	0.44842	1.46082	5e-05	0.000553274	yes
Pfkfb2	chr1:130689042-130729253	WTLV	TGLV	OK	7.61513	7.42254	6.9079	7.99678	8.37632	6.71674	6.5262	9.07971	9.29061	8.35143	9.76634	8.33861	8.52558	8.46359	8.44132	9.00395	11.7746	9.48113	-0.312549	-1.35197	5e-05	0.000553274	yes
Mapkapk2	chr1:131053699-131097843	WTLV	TGLV	OK	56.76	53.0928	54.649	63.0951	60.5346	61.8681	67.7017	67.0911	45.2204	48.7527	51.8221	50.4917	53.2401	50.6902	51.3648	48.3196	64.3275	72.1259	0.165082	1.05184	0.0024	0.0162041	yes
Eif2d	chr1:131153171-131245178	WTLV	TGLV	OK	7.4705	7.06451	7.24589	8.59589	7.84269	7.55038	9.49711	7.84997	6.96906	6.04224	5.73812	6.45279	5.06755	6.26124	6.73985	6.14816	8.59457	9.96157	0.212948	0.808248	0.0207	0.087858	no
Srgap2	chr1:131285250-131527361	WTLV	TGLV	OK	3.56097	2.9539	3.20569	3.93275	3.39838	3.81923	3.31766	3.38786	3.64353	3.27745	3.22057	3.06122	2.92613	3.13911	3.73894	3.32582	4.68335	4.43594	-0.0783006	-0.340942	0.3343	0.579408	no
Pm20d1	chr1:131797383-131821419	WTLV	TGLV	OK	1.34686	1.5639	1.16735	0.88404	1.22558	1.51206	1.36195	1.56436	0.985468	1.17047	1.06481	1.08268	0.873458	1.40849	1.349	1.43163	1.72157	1.74148	0.0165891	0.0438548	0.8976	0.956538	no
Slc41a1	chr1:131828011-131848863	WTLV	TGLV	OK	5.56846	6.08018	4.5245	4.82464	5.45114	5.11555	6.08946	4.49251	5.85821	6.11909	4.75295	5.4875	6.32977	6.70361	7.11252	5.66385	7.85909	6.42336	-0.291034	-1.41998	5e-05	0.000553274	yes
Rab29	chr1:131867209-131872887	WTLV	TGLV	OK	3.65052	3.85677	3.27028	1.89744	3.90545	2.83805	4.35929	5.59066	3.90288	2.24867	3.85282	2.94699	2.56661	2.78931	1.3909	4.39062	4.04963	4.57788	0.176889	0.403929	0.254	0.493037	no
Nucks1	chr1:131910457-131936321	WTLV	TGLV	OK	9.27556	7.55069	8.38135	7.14681	8.88519	8.55345	8.38946	9.52153	8.99594	9.18079	8.48348	7.83521	8.8761	8.59303	9.49996	8.2191	11.4383	10.2784	-0.154257	-0.864702	0.01445	0.0674276	no
Elk4	chr1:132007604-132068062	WTLV	TGLV	OK	8.92168	8.48392	7.54319	8.87546	8.78679	8.79412	6.85455	9.00338	8.20478	7.35735	7.42573	8.3802	7.45496	8.20774	8.89441	7.2329	10.2549	10.0883	-0.0236278	-0.103173	0.769	0.891552	no
Mfsd4a	chr1:132007604-132068062	WTLV	TGLV	OK	4.0301	3.36822	3.90953	4.30967	4.33997	4.53917	4.45907	5.11047	4.33134	3.86185	3.97688	3.96327	3.58447	4.03247	4.22491	4.01919	5.21952	5.10163	-0.0329592	-0.0869733	0.807	0.911313	no
Cdk18	chr1:132113546-132139957	WTLV	TGLV	OK	1.78705	2.25512	1.98804	2.0752	1.71809	2.10333	1.77341	2.20798	2.54581	2.23296	2.37938	2.55996	3.21212	3.21949	2.83682	2.92957	3.77809	2.56711	-0.557513	-1.84776	5e-05	0.000553274	yes
Klhdc8a	chr1:132298483-132307357	WTLV	TGLV	OK	3.55738	1.42566	2.78379	2.36859	3.28128	2.06569	2.45605	3.44012	2.82071	3.09334	3.70831	2.76118	2.89169	2.79893	3.23436	2.75769	4.02585	3.3474	-0.266251	-0.890356	0.01295	0.0621947	no
Tmcc2	chr1:132356314-132391807	WTLV	TGLV	OK	5.77285	4.86778	5.31685	4.84534	5.49821	5.61395	6.01222	5.81265	4.54701	4.43962	4.80646	4.89352	4.733	4.15537	4.49849	3.93162	5.83359	6.52946	0.162581	0.707168	0.04405	0.153571	no
Dstyk	chr1:132417181-132466959	WTLV	TGLV	OK	2.82914	2.66198	2.31619	2.71915	2.64638	2.39647	3.01075	2.70103	2.26362	1.78159	2.40109	2.28389	2.37409	2.27671	2.2624	2.20235	3.00176	3.29776	0.135679	0.570385	0.1081	0.287094	no
Rbbp5	chr1:132477347-132508639	WTLV	TGLV	OK	2.73803	3.36229	2.7761	2.5128	2.4102	3.15349	2.74165	2.81051	4.03113	2.69353	3.84774	3.22946	3.32836	3.40282	3.3644	3.45978	7.61421	5.5116	-0.466224	-1.30553	0.00025	0.00236014	yes
Lrrn2	chr1:132880354-132940005	WTLV	TGLV	OK	0.994764	0.307913	0.850557	0.855152	0.893369	0.673843	0.594131	0.861983	0.497956	0.332866	0.39133	0.19895	0.31842	0.436383	0.338169	0.246482	0.452735	0.916321	1.01719	1.78491	5e-05	0.000553274	yes
Mdm4	chr1:132986104-133035870	WTLV	TGLV	OK	1.80741	3.18547	3.10202	3.08882	3.17944	3.0843	2.07145	2.92606	2.03739	2.85366	3.1734	3.27294	3.12776	2.2521	2.14998	2.74502	3.62822	3.58605	-0.0168671	-0.0446566	0.90125	0.957978	no
Pik3c2b	chr1:133045671-133108691	WTLV	TGLV	OK	3.15444	3.04382	2.82527	3.31563	3.33744	3.00028	2.94787	3.01242	2.88747	2.80588	3.03449	3.18588	3.23695	2.80764	3.45204	2.78848	4.24928	4.10585	-0.0495362	-0.228822	0.5193	0.740061	no
Ppp1r15b	chr1:133131165-133139800	WTLV	TGLV	OK	3.14535	2.981	3.65101	3.32022	4.02526	3.98104	3.42261	3.89124	2.76424	2.91331	3.68665	3.06351	4.01588	2.8291	3.79702	3.15773	4.22024	4.24695	0.00910097	0.041059	0.90575	0.959881	no
Plekha6	chr1:133163767-133303435	WTLV	TGLV	OK	9.77765	9.61964	8.64775	8.37392	10.3247	8.98079	9.85494	9.15075	8.47396	7.45448	7.325	7.20938	7.77233	8.85827	8.53538	7.78987	10.6103	11.4448	0.109227	0.595316	0.0889	0.250381	no
Gm19461	chr1:133163767-133303435	WTLV	TGLV	OK	3.15712	2.42858	2.33678	2.90698	2.69743	2.48388	3.18816	1.47646	1.5054	1.74422	1.72894	1.96748	2.30068	2.03663	1.84394	2.15085	2.41431	3.06849	0.345918	0.524375	0.13995	0.339653	no
Sox13	chr1:133382299-133424212	WTLV	TGLV	OK	1.80067	1.92671	2.0451	3.08526	3.15056	2.49223	2.18687	2.6022	2.36748	2.01975	2.23804	2.10783	2.075	2.49122	2.64509	2.39639	3.26068	3.21686	-0.0195207	-0.0659249	0.8517	0.933681	no
Snrpe	chr1:133603870-133610280	WTLV	TGLV	OK	11.0939	11.2067	12.2618	5.84665	10.3612	11.0753	8.0586	13.9159	9.78321	8.94951	11.0875	10.754	10.7974	11.5291	12.1595	11.2926	29.7783	26.3675	-0.175501	-0.571661	0.10485	0.281304	no
Zc3h11a	chr1:133619867-133661399	WTLV	TGLV	OK	7.74422	7.6393	7.89209	8.36316	8.04057	7.8962	7.12113	7.7463	6.82676	6.84415	7.26448	6.80598	7.08355	7.77826	6.80892	6.94836	10.5165	10.795	0.0377126	0.167987	0.63545	0.814975	no
Zbed6	chr1:133619867-133661399	WTLV	TGLV	OK	4.31203	5.17518	5.02456	4.79008	4.90497	5.07028	5.02769	4.64951	4.32441	4.06549	4.35279	4.33909	4.51841	4.51874	4.25606	4.40812	5.58703	5.80045	0.0540833	0.180203	0.61195	0.799333	no
Atp2b4	chr1:133702673-133801038	WTLV	TGLV	OK	2.49763	2.45089	2.61136	2.51553	3.00542	2.21871	2.10368	2.76966	2.34903	2.37721	2.15281	2.45442	2.31367	2.53027	2.75262	2.36271	3.30335	3.23136	-0.0317871	-0.148275	0.66405	0.832985	no
Prelp	chr1:133910303-133929977	WTLV	TGLV	OK	10.2718	7.45628	7.61791	11.8228	12.9123	10.9776	10.6765	8.76786	7.07434	7.14101	7.94088	7.64493	7.58191	6.73709	8.25612	7.55941	9.63513	11.9654	0.312489	1.57079	5e-05	0.000553274	yes
Btg2	chr1:134074864-134079155	WTLV	TGLV	OK	4.9982	2.8562	4.87974	3.86947	4.09047	5.0394	5.12215	4.24453	3.63102	4.45594	4.65018	3.64268	4.23505	3.68556	4.4068	4.5055	5.37352	5.20608	-0.0456697	-0.183723	0.593	0.78798	no
Adora1	chr1:134193416-134235457	WTLV	TGLV	OK	0.70556	0.929846	0.713603	0.539304	0.945324	0.909166	1.08414	0.830362	0.928478	0.87165	0.705015	0.622257	0.773621	0.742364	0.80168	0.783607	0.999747	0.993577	-0.0089301	-0.0230072	0.9479	0.977145	no
Tmem183a	chr1:134346096-134362001	WTLV	TGLV	OK	4.14129	3.13722	3.58985	2.78908	4.25236	3.6782	5.23154	3.72865	2.69054	3.16013	4.46581	3.69129	3.75969	4.61874	4.3147	3.18203	5.15161	5.17595	0.00680245	0.0163831	0.96345	0.983861	no
Cyb5r1	chr1:134405560-134411740	WTLV	TGLV	OK	6.56624	5.3646	6.49293	4.85269	6.00337	5.51864	4.64296	7.10588	4.99755	3.87102	5.23201	4.20642	5.00729	4.82286	6.02536	5.44153	7.15355	7.79517	0.123921	0.437871	0.21155	0.442281	no
Adipor1	chr1:134415377-134433351	WTLV	TGLV	OK	29.4944	21.5708	25.9833	26.0072	26.6823	26.5089	25.3296	28.1247	24.507	24.8616	25.5481	24.3871	26.7117	24.9569	23.5481	25.1378	32.2103	31.3527	-0.0389303	-0.230447	0.51305	0.735799	no
Klhl12	chr1:134455495-134490880	WTLV	TGLV	OK	3.91543	3.51841	4.31853	3.69684	3.81106	4.16343	3.38979	3.20912	3.5003	4.09668	2.61302	3.66156	5.10823	3.90216	3.60817	3.49727	5.1299	4.69473	-0.127889	-0.508775	0.14795	0.352062	no
Rabif	chr1:134494659-134507885	WTLV	TGLV	OK	1.66796	1.85864	2.30359	1.9398	2.11884	1.24063	1.62935	1.72969	1.49784	1.58757	2.09971	2.01635	1.92207	1.66276	1.601	1.54294	2.24302	2.19796	-0.0292722	-0.0723422	0.8382	0.928172	no
Kdm5b	chr1:134540940-134632878	WTLV	TGLV	OK	2.69504	2.15434	2.24727	2.07634	2.14161	2.3137	2.24176	2.34124	2.08581	1.89269	1.54943	1.92414	1.97773	2.08686	2.25818	1.83201	2.8536	2.95	0.0479338	0.199523	0.57035	0.773612	no
Ppp1r12b	chr1:134754657-134955965	WTLV	TGLV	OK	62.8821	65.3641	52.3788	66.1903	64.7169	63.5686	67.569	64.3884	50.2585	51.4193	50.6283	54.7887	54.9021	52.7208	52.9695	51.6964	68.9734	76.9088	0.157108	0.885331	0.01235	0.0598967	no
Ube2t	chr1:134962564-134974180	WTLV	TGLV	OK	0.48949	0.480966	0.245994	0.774139	0.720819	0.335013	0.824932	0.437865	0.754175	1.01678	1.16457	0.671375	0.580276	0.512141	0.268475	1.11435	1.34156	0.980972	-0.451622	-0.591801	0.0904	0.253338	no
Lgr6	chr1:134983299-135105374	WTLV	TGLV	OK	1.50868	1.43215	1.04926	0.978672	1.62235	2.00043	0.385619	1.38272	3.34775	4.09139	3.04404	3.88493	4.61405	3.81707	2.11629	3.42854	4.98161	1.6697	-1.57702	-4.68918	5e-05	0.000553274	yes
Arl8a	chr1:135146833-135156268	WTLV	TGLV	OK	3.90981	2.58179	4.12624	3.36654	4.641	3.8221	3.69475	5.33254	6.54758	4.18654	5.10414	5.37518	5.29808	4.29534	2.79379	5.85567	6.67745	4.89692	-0.447421	-1.47394	5e-05	0.000553274	yes
Rnpep	chr1:135262698-135284423	WTLV	TGLV	OK	4.84298	3.38777	3.71301	3.4454	3.78194	3.27069	2.4919	3.73775	3.3224	3.65646	3.15887	4.98098	3.6957	4.03234	3.22049	2.86143	5.00104	4.47149	-0.161471	-0.563527	0.108	0.286892	no
Timm17a	chr1:135301534-135313737	WTLV	TGLV	OK	41.6129	31.5736	36.8776	30.4583	39.6796	33.4313	32.4486	33.6146	28.7225	30.3562	33.3259	35.3439	37.1592	38.848	31.6301	38.3522	55.6422	53.8644	-0.0468463	-0.239818	0.4987	0.724708	no
Lmod1	chr1:135324812-135368065	WTLV	TGLV	OK	0.7317	0.372083	0.531146	0.4734	1.14282	1.14957	0.71587	1.14877	0.608868	0.802143	0.822409	1.04062	1.13761	0.813421	0.551827	1.036	1.11492	0.970919	-0.199515	-0.487536	0.1649	0.378024	no
Shisa4	chr1:135371056-135375278	WTLV	TGLV	OK	0.186986	0.173639	0.561021	0.423467	0.963275	0.768803	0.378199	1.52555	0.765823	0.141259	1.12994	1.30764	0.882741	1.41966	0.583307	1.26662	1.25209	0.764677	-0.711413	-0.965015	0.00625	0.0350053	yes
Ipo9	chr1:135382314-135430491	WTLV	TGLV	OK	3.87212	3.75836	3.83272	3.57577	3.8926	3.93534	3.22549	3.74232	4.41399	3.90563	4.53777	3.62869	4.04423	4.77795	3.89055	4.06576	5.61971	4.88277	-0.202795	-0.883129	0.0117	0.0573319	no
Nav1	chr1:135434579-135688116	WTLV	TGLV	OK	2.69267	3.0266	3.58681	3.74393	4.41849	3.51772	3.02854	3.59388	2.97509	2.25388	2.87768	2.67649	3.12826	3.26352	2.81922	3.44702	3.98291	4.32393	0.11852	0.483316	0.16285	0.374558	no
Csrp1	chr1:135729196-135752229	WTLV	TGLV	OK	10.0986	6.6762	9.5514	11.9201	11.255	8.38567	9.33264	13.4066	9.39537	7.9209	9.46032	8.68826	8.89941	9.39751	9.13472	7.94945	11.9184	12.2264	0.0368026	0.157634	0.64785	0.822785	no
Phlda3	chr1:135766084-135769134	WTLV	TGLV	OK	2.06058	1.14807	2.29546	2.12566	2.07583	1.62571	1.42761	2.14264	0.787673	0.882569	1.40506	1.15391	1.23672	1.03756	0.692249	1.07219	1.39252	2.27366	0.707319	1.37374	5e-05	0.000553274	yes
Lad1	chr1:135818597-135833341	WTLV	TGLV	OK	0.397019	1.1277	1.15019	0.470081	0.941077	0.75935	1.42832	0.805522	0.484624	0.350098	0.244993	0.149464	0.762505	0.299331	0.493163	0.300906	0.559738	1.18913	1.08708	2.07149	5e-05	0.000553274	yes
Tnnt2	chr1:135836314-135852268	WTLV	TGLV	OK	4777.18	4000.45	3980.74	3553.96	4284.83	4367.72	4109.69	4321.75	4360.64	4332.96	4420.05	4410.28	4748.37	4502.26	4283.76	4579.75	6205.75	5361.27	-0.21103	-1.1495	0.00125	0.00948444	yes
Tmem9	chr1:135953204-136040925	WTLV	TGLV	OK	3.57428	3.36717	2.5512	2.03322	2.81554	3.2695	3.61363	1.99689	1.47096	2.32961	1.52154	1.60233	1.79078	2.60833	1.8894	1.95094	2.75911	3.61402	0.389402	0.948469	0.0072	0.0389076	yes
Cacna1s	chr1:136052804-136119822	WTLV	TGLV	OK	1.38926	1.17711	1.30325	1.57295	1.3019	1.74374	1.46035	1.81454	1.95352	2.11981	2.25891	1.87084	2.43471	2.28937	2.03356	2.06537	3.18425	2.07631	-0.616935	-2.12255	5e-05	0.000553274	yes
Camsap2	chr1:136268122-136346399	WTLV	TGLV	OK	5.87968	5.10391	4.96321	5.72581	5.79887	5.89766	5.74607	5.61747	4.64715	4.97989	5.30973	5.35234	5.12934	4.99537	5.07188	4.55449	6.49509	6.69944	0.044691	0.229149	0.5193	0.740061	no
Ddx59	chr1:136411915-136456192	WTLV	TGLV	OK	2.67717	2.90786	1.96259	2.60272	2.99771	3.78804	3.56521	2.29975	2.46366	2.17625	2.12448	2.32866	2.7383	2.68452	4.45056	2.6832	3.62233	3.52929	-0.0375374	-0.111499	0.7468	0.881199	no
Zfp281	chr1:136624900-136630391	WTLV	TGLV	OK	2.69908	2.13635	2.65273	2.27658	2.13202	2.21257	2.64069	2.02093	2.0915	2.57355	2.43867	1.96037	2.64126	2.28111	1.94916	2.40682	2.96378	2.7996	-0.0822196	-0.328075	0.3516	0.595686	no
Ptprc	chr1:138062858-138175756	WTLV	TGLV	OK	1.37021	1.06464	1.55755	1.85786	1.28406	1.17664	0.94864	1.00705	0.884783	1.01806	0.806705	0.723776	1.03384	1.43364	1.07363	0.886882	1.59497	1.90869	0.259052	0.831594	0.01575	0.0717945	no
Nek7	chr1:138483836-138619757	WTLV	TGLV	OK	12.1692	11.1899	10.405	10.5776	11.1875	12.9786	12.6179	11.1849	11.5187	12.3181	12.0108	12.0686	11.4929	12.1391	11.7565	11.8694	15.7734	14.013	-0.170725	-0.949951	0.00805	0.0425485	yes
2310009B15Rik	chr1:138851978-138856854	WTLV	TGLV	OK	3.00383	2.78936	1.86477	2.40072	4.22242	3.80199	2.11067	4.39167	2.02631	3.40565	3.24382	4.33488	2.63003	2.50738	2.12003	2.71446	4.86762	4.58542	-0.0861624	-0.151099	0.6712	0.837815	no
Dennd1b	chr1:138963219-139176043	WTLV	TGLV	OK	3.23533	3.19292	2.93367	3.25513	3.32385	3.45497	3.57088	3.86611	2.85468	3.62092	3.10412	3.61412	3.59336	3.69924	3.43774	3.23767	4.50942	4.11068	-0.133565	-0.639544	0.0684	0.208747	no
Zbtb41	chr1:139421721-139453007	WTLV	TGLV	OK	3.30577	3.03268	3.5202	3.7608	3.5026	3.18199	3.53278	3.91227	2.89519	2.88989	3.5013	3.12568	2.68661	3.07036	2.98111	2.67517	3.95794	4.19514	0.0839671	0.414791	0.23985	0.475878	no
Cfh	chr1:140085854-140183411	WTLV	TGLV	OK	25.1853	20.0128	24.8512	21.501	40.6751	27.1347	23.9764	29.1497	20.5907	20.1512	22.5756	18.226	19.3769	20.508	20.6401	21.0008	27.5091	32.7877	0.253245	1.54777	5e-05	0.000553274	yes
Kcnt2	chr1:140245656-140656402	WTLV	TGLV	OK	0.634245	0.795093	0.65133	0.770902	0.886945	0.805084	0.735773	0.70689	0.642832	0.398938	0.46298	0.429376	0.36963	0.585338	0.585159	0.417987	0.811788	1.16513	0.52132	1.131	0.00025	0.00236014	yes
Cdc73	chr1:143603275-143702893	WTLV	TGLV	OK	8.5665	9.30866	7.22976	7.04262	10.2384	6.38563	9.88008	8.13609	7.93126	7.08731	9.46032	9.03711	8.57152	8.58888	9.87524	8.69678	11.4656	10.3419	-0.148815	-0.502161	0.15285	0.360172	no
B3galt2	chr1:143603275-143702893	WTLV	TGLV	OK	0.40201	0.483916	0.541242	0.599396	0.55812	0.669225	0.554907	0.679707	1.93513	2.4393	3.09264	2.54106	2.1447	1.93563	2.12944	1.8889	2.92908	0.671172	-2.1257	-3.20331	5e-05	0.000553274	yes
Glrx2	chr1:143739223-143749678	WTLV	TGLV	OK	10.0157	11.5855	13.9763	11.8974	14.3911	12.095	12.3044	10.4775	13.8428	8.88343	12.0403	10.0852	13.8806	12.0186	12.0244	12.0886	15.4358	14.9847	-0.0427911	-0.106327	0.7639	0.88927	no
Trove2	chr1:143750789-143777058	WTLV	TGLV	OK	3.68675	3.20308	2.62138	3.12833	3.30431	3.25456	2.50823	2.94426	2.46739	1.87315	2.91539	2.73911	3.00876	2.63369	2.33593	2.54836	3.46593	3.76541	0.119568	0.395508	0.2656	0.504866	no
Uchl5	chr1:143777217-143807466	WTLV	TGLV	OK	7.2003	8.70435	6.964	4.13868	7.39655	6.37377	7.86701	7.48445	6.67486	6.9233	5.37907	6.77445	5.6009	8.24347	8.62367	7.61528	10.3219	9.86766	-0.0649242	-0.231197	0.5192	0.740061	no
Rgs2	chr1:143999337-144004149	WTLV	TGLV	OK	7.91549	8.10476	7.78478	4.97604	8.24437	7.85829	10.1151	7.72385	4.46196	5.31909	3.72569	4.75387	5.95164	5.22781	6.57281	4.37122	6.54003	9.39502	0.522599	2.31879	5e-05	0.000553274	yes
Gm35356	chr1:144080638-144118676	WTLV	TGLV	OK	2.28027	2.8648	2.04474	1.07996	2.01118	3.84822	1.66634	2.0411	0.878978	1.72353	1.40711	1.43074	1.54568	1.9648	2.05998	0.797653	2.22424	3.18201	0.516625	0.787742	0.02705	0.107881	no
Gm35415	chr1:144197417-144200826	WTLV	TGLV	OK	1.2236	0.811596	1.43481	0.351845	0.327616	0.668655	0	0.531984	0.190911	0.374344	0	0.18645	0.335717	0.640122	0	0.173247	0.333102	1.00333	1.59077	0.914662	0.0184	0.0804337	no
Pla2g4a	chr1:149829617-149961290	WTLV	TGLV	OK	0.638324	0.592748	0.691324	0.617715	1.17336	0.44609	0.516146	0.473214	0.21451	0.473195	0.360568	0.445436	0.0943573	0.629343	0.659829	0.17033	0.716887	0.931709	0.378134	0.716522	0.03915	0.141105	no
BC003331	chr1:150361310-150466221	WTLV	TGLV	OK	6.37078	5.06457	6.51522	4.64435	5.59664	6.36059	6.79633	6.43864	5.52504	4.37855	5.42911	5.52101	5.6898	5.96995	5.26022	5.19316	7.27174	7.52937	0.050228	0.0781166	0.82725	0.921773	no
Tpr	chr1:150361310-150466221	WTLV	TGLV	OK	31.8112	31.4105	30.6421	33.4315	32.1454	31.0331	31.971	31.1457	30.3449	30.678	31.0409	31.958	32.5171	31.6755	31.6013	30.8164	41.1548	38.4088	-0.0996249	-0.615512	0.0828	0.238307	no
Prg4	chr1:150361310-150466221	WTLV	TGLV	OK	2.4349	3.38179	3.70492	3.59737	5.23035	3.26692	4.22589	4.18336	1.45515	1.68364	2.41339	1.65768	1.78661	2.1783	2.4783	1.61722	3.65857	5.94644	0.700747	0.728612	0.044	0.153442	no
Hmcn1	chr1:150562499-150993777	WTLV	TGLV	OK	1.22296	1.51344	1.27218	1.29942	1.41368	1.32922	1.08111	1.56356	1.46903	1.40303	1.62322	1.67377	1.68686	1.56144	1.41698	1.51282	2.34126	1.84106	-0.346749	-1.51426	5e-05	0.000553274	yes
LOC108167733	chr1:151298478-151364445	WTLV	TGLV	OK	2.6228	1.67893	2.65109	2.67016	4.13218	3.57638	2.71163	3.14789	1.77131	2.31847	2.90679	3.43611	2.78755	2.89378	1.68061	2.39187	3.35301	3.50262	0.0629775	0.0304938	0.94175	0.975274	no
Ivns1abp	chr1:151298478-151364445	WTLV	TGLV	OK	97.9021	98.9864	93.8514	100.664	111.318	114.001	101.434	104.211	145.514	151.249	150.099	140.325	150.236	159.785	133.724	139.419	187.866	122.001	-0.62282	-4.10164	5e-05	0.000553274	yes
Swt1	chr1:151367697-151428450	WTLV	TGLV	OK	1.55948	1.3267	0.991971	1.47574	1.62074	1.4382	1.11379	1.06796	1.35507	1.3688	1.12408	1.66364	1.07489	1.42846	1.91268	1.1738	2.00853	1.7333	-0.212614	-0.625311	0.0726	0.217745	no
Trmt1l	chr1:151428546-151458183	WTLV	TGLV	OK	6.07896	4.43374	4.33492	5.55417	4.32841	4.21596	6.2232	4.30348	3.74777	3.40467	4.33117	3.95872	4.93623	4.1557	4.68961	4.75797	5.84596	6.3313	0.11506	0.430855	0.2223	0.455986	no
Rnf2	chr1:151469405-151500922	WTLV	TGLV	OK	3.25054	3.14185	3.19031	3.09551	3.19779	3.32944	3.29838	4.0225	2.84533	2.29602	2.90246	2.95119	2.87832	3.06071	2.45581	2.74221	3.68958	4.03071	0.127576	0.448029	0.204	0.433079	no
LOC102640575	chr1:151520302-151520769	WTLV	TGLV	OK	105.624	99.6444	103.318	93.3812	104.479	92.38	96.9769	109.482	89.4203	100.802	96.5178	94.7692	121.204	107.477	86.4618	80.8623	9.16249	8.77656	-0.0620843	-0.123585	0.72665	0.870706	no
Fam129a	chr1:151571372-151721939	WTLV	TGLV	OK	3.37889	2.98862	3.28317	3.78981	3.40225	3.58169	2.93514	3.3191	2.85849	2.25969	2.4756	2.26242	2.10085	3.26981	2.79515	2.55463	3.65142	4.4112	0.272713	1.09768	0.0015	0.0110551	yes
Edem3	chr1:151755343-151822328	WTLV	TGLV	OK	3.60207	3.21315	3.47895	3.58488	3.81464	3.96702	3.75246	4.03032	3.37582	3.76208	3.48062	3.43681	3.53494	4.22071	3.42243	3.61266	4.85208	4.65062	-0.0611826	-0.295593	0.40195	0.643828	no
1700025G04Rik	chr1:151884523-152090320	WTLV	TGLV	OK	9.25234	6.99247	6.64293	8.66604	8.74496	9.81217	7.42572	9.93517	5.94217	6.48195	6.52526	5.98862	5.27904	6.21415	4.89605	7.42363	8.0298	10.1007	0.33102	1.40768	5e-05	0.000553274	yes
Tsen15	chr1:152370734-152386682	WTLV	TGLV	OK	5.60008	5.78526	5.13028	5.5656	6.10072	5.15461	4.61568	5.14847	4.70185	5.20941	6.46217	5.00266	4.60465	5.8639	5.71122	3.91992	6.72103	6.4472	-0.0600108	-0.176645	0.62105	0.805539	no
Colgalt2	chr1:152399804-152510695	WTLV	TGLV	OK	1.52154	1.17727	1.07083	1.61778	0.918892	1.55203	1.71681	1.5264	0.959933	1.14047	1.3124	1.06394	0.762752	1.51656	1.59769	1.23976	1.7413	1.82804	0.0701331	0.215504	0.5406	0.752059	no
Rgl1	chr1:152516761-152766270	WTLV	TGLV	OK	4.95954	5.29703	6.02968	4.94639	5.90606	4.82917	4.58824	5.68432	4.71684	4.28549	4.26239	4.37459	4.76317	4.4011	5.86258	3.95761	6.24829	6.70074	0.100859	0.457316	0.1956	0.422835	no
Arpc5	chr1:152766541-152775580	WTLV	TGLV	OK	5.36289	5.19417	4.28258	5.35865	5.15176	4.77935	5.40038	5.06996	5.10141	5.22791	4.96046	4.28513	4.46696	4.71619	4.64944	3.5054	5.91494	6.00566	0.0219587	0.0774835	0.82495	0.920672	no
Ncf2	chr1:152800152-152836990	WTLV	TGLV	OK	0.456701	0.475863	0.383157	0.79031	0.905141	0.781684	0.695282	0.798997	0.649316	0.509125	0.568922	0.333144	0.413777	0.666752	0.599116	0.751081	1.11253	1.28108	0.203521	0.426951	0.2244	0.45853	no
Smg7	chr1:152836994-152902684	WTLV	TGLV	OK	7.43611	6.87486	6.05647	6.22906	6.91392	6.56324	6.57122	6.78376	5.86455	6.73728	6.97979	7.43986	6.25334	7.10968	6.3095	5.98508	9.38975	8.78041	-0.0967984	-0.516555	0.14575	0.348862	no
Lamc1	chr1:153218921-153332786	WTLV	TGLV	OK	21.7325	21.6648	21.005	24.1963	26.0437	22.0259	22.6559	24.4163	20.005	16.5857	18.6623	18.9195	19.4276	20.4751	20.5819	18.3369	24.8412	27.5669	0.150203	0.961189	0.00655	0.0362734	yes
Dhx9	chr1:153455755-153487689	WTLV	TGLV	OK	10.1727	8.94529	8.8864	9.10216	9.65668	9.04147	9.48184	9.20461	6.98798	7.82919	6.78123	7.86448	8.96643	7.14565	7.66799	7.83055	10.3994	11.6603	0.165115	0.88091	0.0131	0.0627368	no
Npl	chr1:153503015-153549714	WTLV	TGLV	OK	0.542602	0.554246	0.827144	0.928348	0.711875	0.467008	0.674073	1.15594	0.177784	1.33632	0.170763	0.34726	0.416843	0.298053	0.0520819	1.07556	0.884545	1.10646	0.322938	0.46765	0.1846	0.40656	no
Mir8114	chr1:153899925-153909723	WTLV	TGLV	OK	905.764	963.654	995.135	1758.11	1279.23	987.841	1840.3	1013.76	1351.77	835.559	1170.02	1540.67	1453.84	1321.84	1548.46	995.642	1453.46	1282.2	-0.180875	-0.188327	0.5986	0.791021	no
Glul	chr1:153899925-153909723	WTLV	TGLV	OK	21.5505	40.1199	27.0885	40.4846	30.736	26.7204	40.7985	24.1801	37.7251	27.0999	31.335	25.8189	33.2044	32.0116	36.9355	23.2322	49.1726	46.1776	-0.0906618	-0.538094	0.1306	0.325509	no
Ier5	chr1:155096366-155099636	WTLV	TGLV	OK	2.54852	2.22851	2.16662	3.24886	3.04504	3.24959	3.71399	2.75774	3.2937	3.20646	3.38643	2.37858	3.07954	2.54706	2.91507	3.05211	3.83772	3.4006	-0.17446	-0.631883	0.07105	0.214565	no
Mr1	chr1:155122381-155146813	WTLV	TGLV	OK	2.66008	1.94925	1.72486	1.50612	2.65683	2.89553	2.63433	2.17174	1.60686	1.60646	2.00251	1.6272	1.95648	2.293	2.82265	1.97452	2.62586	2.80872	0.0971242	0.283178	0.42465	0.664081	no
Stx6	chr1:155158676-155212060	WTLV	TGLV	OK	4.44331	3.39296	4.45928	3.386	3.01388	3.32335	3.29432	3.71154	2.87028	2.2725	2.95666	3.16872	2.23538	2.84976	3.47412	2.3051	3.78904	4.55224	0.264744	0.86002	0.0161	0.0730241	no
BC034090	chr1:155212470-155256851	WTLV	TGLV	OK	8.70419	6.50628	6.80956	6.50446	6.21472	7.193	8.01093	7.58379	4.4718	4.81931	5.23468	5.41043	5.12969	4.56786	4.85715	5.09661	6.4531	8.58105	0.411164	2.02434	5e-05	0.000553274	yes
Xpr1	chr1:155275656-155417444	WTLV	TGLV	OK	4.74068	5.04384	4.71797	4.93838	5.37699	4.75106	4.78937	4.82699	4.07904	4.05535	5.28512	4.87938	4.48522	5.06881	3.70242	4.19577	5.88021	5.97213	0.0223761	0.117305	0.74345	0.879339	no
Gm5532	chr1:155520172-155527111	WTLV	TGLV	OK	10.6852	10.1372	8.87931	11.6006	10.7032	8.08625	11.2562	8.53525	13.1862	17.5902	15.534	13.4166	15.0076	15.4439	12.7598	16.0314	19.1409	11.8937	-0.686462	-3.09239	5e-05	0.000553274	yes
Acbd6	chr1:155558097-155687474	WTLV	TGLV	OK	11.1561	7.40678	8.37056	10.584	11.3737	10.5681	9.78895	8.06926	8.77328	9.25968	10.0948	8.1437	9.61594	9.95258	8.75628	6.05443	12.8598	12.785	-0.00841123	-0.0298061	0.9338	0.97217	no
Qsox1	chr1:155778154-155812899	WTLV	TGLV	OK	3.5495	2.9019	2.89721	4.0021	3.93896	3.45023	3.80487	3.37206	2.66957	3.83276	3.48677	2.09088	3.35533	2.49735	3.29889	2.97034	4.25044	4.44065	0.0631594	0.224039	0.52265	0.741387	no
Cep350	chr1:155844963-155974436	WTLV	TGLV	OK	5.32584	6.14348	5.52688	5.87473	6.56569	5.23196	6.16128	5.69	4.9171	4.41426	5.37749	5.48857	5.39003	5.07631	5.30072	5.10038	6.81688	7.19732	0.0783489	0.462827	0.19075	0.416383	no
Tor1aip1	chr1:156004598-156068861	WTLV	TGLV	OK	15.5844	15.0935	15.7723	13.7019	15.9528	14.4448	15.9414	14.2491	15.4847	13.416	13.5288	15.6145	15.9865	14.1834	15.6734	12.6739	22.7784	22.2684	-0.0326694	-0.137993	0.69495	0.851174	no
Tor1aip2	chr1:156004598-156068861	WTLV	TGLV	OK	6.87392	6.60502	6.37979	6.86766	7.47527	6.4334	8.22318	6.06115	5.48514	5.48832	4.48223	5.78659	5.52655	6.36415	6.0279	5.96163	9.56183	10.4936	0.134158	0.437363	0.21145	0.442281	no
Soat1	chr1:156428107-156474328	WTLV	TGLV	OK	0.933177	1.02973	0.716845	1.0588	1.23902	1.13251	0.799596	1.39897	0.522417	0.564677	0.551814	0.501948	0.68754	0.585701	0.456314	0.847775	0.927256	1.35286	0.544969	1.48055	5e-05	0.000553274	yes
Abl2	chr1:156558170-156649619	WTLV	TGLV	OK	1.96741	2.11853	2.06973	2.35859	2.1467	2.00359	1.74929	1.99719	1.77492	1.47325	1.86389	2.05694	1.96043	1.83228	2.06697	1.36101	2.38638	2.51907	0.078069	0.358781	0.30785	0.552421	no
Tor3a	chr1:156653616-156674339	WTLV	TGLV	OK	2.97521	2.32863	1.81916	1.66827	2.01143	2.58104	2.2136	2.65174	1.90324	1.77494	1.62744	1.72277	2.08158	1.77049	1.65227	2.02203	2.43159	2.79693	0.201944	0.654393	0.0676	0.207107	no
Fam20b	chr1:156678544-156719027	WTLV	TGLV	OK	8.51108	7.09556	8.48641	8.25017	9.50474	7.00267	7.71007	6.83878	7.34439	6.14076	8.45308	9.88334	7.70404	7.92993	10.5206	6.96862	10.6528	9.59307	-0.151172	-0.780711	0.02765	0.109352	no
Ralgps2	chr1:156804165-156940195	WTLV	TGLV	OK	1.67208	1.43811	1.58876	0.894324	1.6991	1.53237	2.26699	1.37097	1.23426	1.62889	1.02989	1.39033	1.13812	1.79287	1.35028	0.728826	1.83271	2.13328	0.219095	0.654666	0.0551	0.178912	no
Angptl1	chr1:156804165-156940195	WTLV	TGLV	OK	0.229438	0.882662	1.03774	0.296887	1.22863	0.407485	0.814373	0.266007	0.357978	0.315871	0.275074	0.874037	0.409178	0.390097	0.660682	0.194914	0.594813	0.847944	0.511533	0.473216	0.20125	0.429786	no
Rasal2	chr1:157135182-157420236	WTLV	TGLV	OK	3.87227	4.2032	3.88461	3.99157	3.54535	4.12554	4.556	4.63714	4.03766	4.16945	3.59227	3.54166	4.1917	3.73416	3.97691	4.29982	5.31353	5.05379	-0.0723073	-0.361164	0.30635	0.551234	no
2810025M15Rik	chr1:157135182-157420236	WTLV	TGLV	OK	8.11903	5.73169	5.62359	6.08019	6.41214	6.96117	8.09853	7.86416	5.86292	7.57828	5.16877	6.15362	5.73399	6.25502	5.76931	7.2274	8.26945	8.46564	0.0338278	0.0654631	0.85285	0.934281	no
BC026585	chr1:157455717-157490000	WTLV	TGLV	OK	0.406523	0.389751	0.351765	0.362052	0.752156	0.343855	0.80165	0.0775506	0.523875	0.128391	0.503076	0.406574	0.460506	0.940882	1.66824	0	1.14813	0.785724	-0.547193	-0.87683	0.01345	0.0641274	no
Rfwd2	chr1:159231536-159354872	WTLV	TGLV	OK	3.71144	2.74985	3.23696	3.39719	3.36387	3.70757	3.39637	3.36162	3.16021	3.5854	3.67617	3.76493	3.97662	4.04757	3.62773	3.36705	14.2473	12.6026	-0.176963	-0.978809	0.0052	0.030286	yes
Scarna3a	chr1:159231536-159354872	WTLV	TGLV	OK	43.4358	80.669	16.9779	29.1432	54.2727	83.0759	13.836	0	110.691	15.5034	91.1318	46.3309	27.8073	39.7658	83.3831	28.7	71.5577	47.8556	-0.580418	-0.284987	0.6482	0.822876	no
4930523C07Rik	chr1:160044367-160078587	WTLV	TGLV	OK	3.97341	3.00026	2.75856	4.45196	3.69056	4.07243	3.77891	3.75091	3.56818	4.31976	3.87887	2.76427	3.89625	3.9184	3.62113	4.34658	4.463	3.96551	-0.170509	-0.645842	0.0665	0.204745	no
4930562F07Rik	chr1:160044367-160078587	WTLV	TGLV	OK	0.622152	4.41e-96	0.534671	5.52e-81	1.20684	4.24e-241	3.76e-55	5.98e-82	3.1e-88	2.29e-112	2.53e-42	0.448321	1.26e-160	2.83e-64	2.02e-65	2.18e-211	2.9889	3.13307	0.0679607	0.0810281	0.81545	0.915692	no
Mrps14	chr1:160195259-160201186	WTLV	TGLV	OK	10.7742	11.3541	9.42244	10.4984	12.6406	10.4216	10.3899	10.6171	9.05748	12.4024	11.6856	11.2887	12.3184	11.6563	10.5605	10.0891	14.814	12.9223	-0.197107	-0.708467	0.04365	0.152666	no
Cacybp	chr1:160202366-160212892	WTLV	TGLV	OK	18.0359	13.2214	15.817	15.1979	17.6998	15.2121	20.8321	16.0104	13.9506	15.3734	15.8414	18.1056	18.2355	14.4174	14.5818	13.8583	22.0584	21.4138	-0.0427903	-0.221425	0.52935	0.744958	no
Rabgap1l	chr1:160219173-160793476	WTLV	TGLV	OK	35.9185	20.8083	20.5433	18.9502	26.0379	27.9442	22.7675	30.5617	10.6971	13.1326	10.2895	11.5045	11.2126	11.5308	8.43028	14.9356	15.232	30.2637	0.99048	5.35001	5e-05	0.000553274	yes
Rc3h1	chr1:160906410-160974976	WTLV	TGLV	OK	5.00431	5.18026	4.33744	5.89417	5.35853	5.66571	5.65591	5.61633	4.41238	4.08964	4.20378	4.16692	3.92508	4.86247	4.30426	4.04924	5.57876	6.38474	0.194685	1.09	0.0018	0.0128576	yes
Zbtb37	chr1:161008791-161034864	WTLV	TGLV	OK	2.04519	2.88129	2.10958	1.87086	2.41145	2.19166	2.9897	1.94117	2.49002	2.17447	2.31087	1.9246	1.98764	2.38497	2.68823	2.31	3.11392	2.84591	-0.129844	-0.361938	0.27995	0.522653	no
Gas5	chr1:161035165-161038537	WTLV	TGLV	OK	7.53539	6.45713	8.99857	8.61542	9.57983	7.35193	7.86278	6.60452	8.98634	8.63237	9.576	8.18539	7.98105	10.7792	9.57294	11.3674	12.3232	9.58734	-0.362172	-1.67113	5e-05	0.000553274	yes
Snord47	chr1:161035165-161038537	WTLV	TGLV	OK	608.053	0	713.014	611.959	427.363	436.117	435.798	616.847	498.072	162.773	159.468	324.29	437.93	695.845	729.553	903.978	627.509	569.143	-0.140847	-0.0805155	0.88915	0.95235	no
Dars2	chr1:161040600-161070660	WTLV	TGLV	OK	2.45858	2.27248	1.65234	2.37827	2.23263	2.14369	2.6022	2.78716	1.85242	2.23769	1.25948	1.8295	2.00266	1.85834	2.03043	2.62542	2.77692	3.00739	0.115027	0.39032	0.26795	0.508271	no
Klhl20	chr1:161088374-161131510	WTLV	TGLV	OK	1.41027	1.34455	1.79305	1.50474	2.08639	1.16984	2.17268	1.60469	1.17615	1.19592	0.944629	1.44983	1.80652	1.50388	1.4514	1.19626	1.90676	2.13406	0.162477	0.498844	0.1557	0.364275	no
Prdx6	chr1:161240111-161251210	WTLV	TGLV	OK	28.0848	22.4031	23.2027	25.9527	26.4061	23.143	28.2346	24.3735	22.2075	21.7659	24.9419	23.1655	24.2917	22.0914	23.4691	23.9358	30.568	30.648	0.00377146	0.0212982	0.95135	0.978298	no
Suco	chr1:161816111-161877090	WTLV	TGLV	OK	3.37146	2.69598	2.68083	2.34962	3.07989	3.55344	2.61302	3.34903	2.41663	2.45149	2.55535	2.60186	2.56747	2.88461	2.57695	2.41202	3.65186	3.86507	0.0818614	0.33352	0.3433	0.587004	no
Pigc	chr1:161942088-161982371	WTLV	TGLV	OK	1.28254	1.01525	0.668709	0.994533	1.14278	1.10587	1.04986	1.02381	1.38353	0.765454	1.12956	0.968784	1.07503	0.908863	0.810598	1.04673	1.34866	1.27306	-0.0832279	-0.204438	0.55985	0.766114	no
Dnm3	chr1:161982449-162481653	WTLV	TGLV	OK	1.50698	1.2779	0.845291	1.21556	1.07442	1.52288	1.23325	1.84852	1.57455	1.05736	1.23743	1.43326	1.02751	0.605769	1.38366	1.75392	1.98813	1.90696	-0.0601415	-0.126457	0.71395	0.862418	no
Mettl13	chr1:162533670-162548345	WTLV	TGLV	OK	0.755031	1.12187	0.919083	0.810887	1.13146	1.55031	1.48237	0.995734	0.831076	1.18575	0.950493	0.992711	0.676886	1.04123	0.497181	1.2991	1.37179	1.37786	0.00637085	0.014093	0.96515	0.984611	no
Vamp4	chr1:162570195-162599086	WTLV	TGLV	OK	2.3827	1.79218	2.84628	2.94934	3.01197	3.01591	2.03901	3.10651	1.62918	3.06092	2.40357	2.22673	2.24748	2.45093	1.78595	1.73103	3.03737	3.39598	0.161005	0.528183	0.128	0.320718	no
Prrc2c	chr1:162671784-162740570	WTLV	TGLV	OK	15.8926	18.8806	16.5992	17.4706	17.8528	17.2471	17.0386	19.3894	15.7486	14.2623	16.3328	17.5072	18.6437	17.4357	18.4581	14.4764	21.7549	21.2172	-0.0361027	-0.207919	0.5594	0.76599	no
Fmo1	chr1:162829560-162866548	WTLV	TGLV	OK	3.34389	6.29574	6.62556	6.80602	5.83601	3.69614	6.90358	3.86267	4.42072	4.69746	5.18135	5.43195	6.32548	5.53291	6.44875	2.86361	6.8438	6.8261	-0.00373557	-0.0146739	0.9649	0.984611	no
Fmo2	chr1:162874320-162898712	WTLV	TGLV	OK	2.5482	4.3273	2.27128	3.62192	2.9294	3.10617	4.02886	2.4687	3.4291	2.93651	3.32646	2.06757	2.47298	3.41975	4.30938	2.70198	4.20908	3.97465	-0.0826775	-0.316316	0.3711	0.614724	no
Prrx1	chr1:163245118-163313705	WTLV	TGLV	OK	6.09978	5.11587	5.37576	5.08246	6.55146	5.4048	6.01929	5.74798	5.93926	4.53662	6.23703	6.39239	6.8786	6.68917	7.22357	5.18139	7.97649	6.77931	-0.234616	-1.1556	0.00115	0.00883334	yes
Gorab	chr1:163384902-163403669	WTLV	TGLV	OK	0.751086	0.413324	1.04443	1.12032	1.48423	0.851596	0.797772	1.29869	0.759767	0.536235	0.466932	0.505735	0.480902	0.840739	0.747878	0.744648	0.918402	1.22393	0.414324	0.83086	0.01635	0.0737621	no
Kifap3	chr1:163762137-163917107	WTLV	TGLV	OK	3.70902	3.62197	3.12393	4.66139	3.95056	3.14712	3.7771	4.18537	4.58485	4.5951	4.02506	3.69177	4.56975	3.98522	4.2117	3.28756	5.8083	5.09408	-0.189294	-0.8236	0.0192	0.0830713	no
Scyl3	chr1:163929099-163997243	WTLV	TGLV	OK	1.13269	1.05483	1.05361	0.946416	1.21959	0.741393	1.1814	0.805304	0.751548	0.763997	0.954158	0.997671	0.859773	0.632306	1.46855	0.790762	1.12748	1.08904	-0.0500527	-0.0999076	0.76645	0.890428	no
Mettl18	chr1:163929099-163997243	WTLV	TGLV	OK	0.482705	0.597663	0.877287	0.485814	0.583918	1.64134	0.666304	0.707337	0.761517	0.631741	0.551001	1.02977	1.19672	1.22758	0.875188	0.744218	1.19551	0.921887	-0.374964	-0.343865	0.30395	0.548585	no
Slc19a2	chr1:164249045-164265385	WTLV	TGLV	OK	1.26109	0.799288	0.891962	0.778595	0.619033	0.535999	0.665351	0.527976	0.699591	0.579855	0.861508	0.961377	0.634339	0.73304	1.07597	0.595184	1.0341	0.930383	-0.152477	-0.344776	0.31925	0.564908	no
Ccdc181	chr1:164275597-164287847	WTLV	TGLV	OK	7.11628	4.78646	4.73617	6.00059	5.29899	5.81218	5.95496	6.28266	5.12543	4.24247	4.07563	5.49805	5.50388	4.47246	4.24605	4.53684	6.28225	7.1722	0.191136	0.701164	0.04685	0.160031	no
Blzf1	chr1:164289799-164307484	WTLV	TGLV	OK	6.63281	4.6372	5.73327	5.46335	6.33268	6.98809	5.79311	6.78633	5.34447	6.79274	5.61283	6.48244	5.91668	6.33242	6.46036	6.43067	8.20626	7.26794	-0.175178	-0.74761	0.0333	0.125728	no
Nme7	chr1:164307661-164458355	WTLV	TGLV	OK	2.27779	1.7988	1.80742	1.18359	1.68008	2.52842	1.52454	1.81204	0.743061	2.4581	1.00353	1.49683	1.29601	1.08226	1.10349	1.53976	1.81787	2.21502	0.285072	0.213664	0.53815	0.750239	no
Atp1b1	chr1:164307661-164458355	WTLV	TGLV	OK	81.2941	62.9522	62.2659	62.4637	69.6474	69.3764	68.6764	77.9585	50.2065	53.5528	55.4315	56.6646	59.2625	56.8257	54.477	55.7408	71.2622	82.5059	0.211361	1.33383	0.00015	0.00149861	yes
Dpt	chr1:164796731-164824266	WTLV	TGLV	OK	30.5371	19.9594	24.3518	21.2663	32.9179	25.4223	26.8367	28.5816	18.6114	17.0305	19.974	17.3526	17.1496	17.0154	19.1482	16.9345	23.1891	31.1043	0.423666	2.15259	5e-05	0.000553274	yes
Sft2d2	chr1:165174340-165194443	WTLV	TGLV	OK	1.28979	2.09114	1.93017	2.03231	2.54404	1.36267	2.36234	1.45799	2.12525	1.20559	1.66898	2.14883	1.98617	2.52089	2.20487	1.50966	2.53521	2.3001	-0.140407	-0.534972	0.12655	0.318502	no
Tiprl	chr1:165212285-165326747	WTLV	TGLV	OK	7.28388	6.91764	7.29086	5.86382	6.23674	7.48321	6.49365	7.72633	4.48611	7.1447	7.84988	7.93983	7.2799	7.76752	8.64285	7.48665	9.52418	8.42838	-0.17634	-0.635891	0.07095	0.214318	no
Dcaf6	chr1:165329499-165460553	WTLV	TGLV	OK	34.7967	26.5556	27.0951	28.1818	25.6302	32.1035	28.3231	29.4161	22.9751	29.1459	28.1836	24.6631	27.7597	26.7332	24.0077	26.4826	34.0794	34.7474	0.0280055	0.161954	0.64925	0.823237	no
Mpc2	chr1:165461207-165481214	WTLV	TGLV	OK	203.385	152.521	163.763	163.442	177.481	181.403	166.224	170.883	174.528	195.89	177.861	190.817	188.493	181.259	175.79	182.754	240.495	208.938	-0.202936	-1.26929	0.00025	0.00236014	yes
Mpzl1	chr1:165592180-165634560	WTLV	TGLV	OK	2.42005	1.57309	3.32211	2.01474	2.09778	2.02507	1.41649	2.94606	1.48688	1.84633	1.61844	1.91691	2.4692	2.40949	2.0616	1.79891	2.63284	2.86161	0.120206	0.341606	0.32435	0.569847	no
Rcsd1	chr1:165648944-165710063	WTLV	TGLV	OK	18.613	17.5661	16.5632	17.8098	20.5539	16.9489	19.3099	17.8822	18.2711	16.9908	17.1202	16.7353	18.6375	18.128	19.9323	16.3024	22.8404	21.6733	-0.0756632	-0.410889	0.24175	0.477645	no
Creg1	chr1:165763731-165775304	WTLV	TGLV	OK	31.3405	33.7301	39.3885	24.7433	34.6888	25.4933	38.6383	25.1455	30.5449	29.5005	28.6777	30.3346	37.5667	33.7328	35.9988	22.8807	40.9123	38.7999	-0.0764828	-0.282236	0.4148	0.6557	no
Pou2f1	chr1:165779941-166002672	WTLV	TGLV	OK	1.20856	1.5394	0.962231	1.07565	1.16999	1.08135	1.09441	1.21998	1.00782	0.887521	1.09374	1.11705	1.25288	0.995372	1.37537	0.923985	1.49473	1.49281	-0.00185153	-0.00767596	0.98145	0.992186	no
Dusp27	chr1:166098147-166127898	WTLV	TGLV	OK	8.10381	6.9707	8.2223	7.72661	7.93014	6.33033	6.71698	6.73272	7.89234	9.29853	7.66003	8.75313	9.21935	10.5118	10.1532	9.02949	11.7552	8.88067	-0.404553	-2.06569	5e-05	0.000553274	yes
Tada1	chr1:166379166-166409850	WTLV	TGLV	OK	0.737794	1.40218	1.21908	0.801927	1.6922	1.08111	0.993474	0.748465	1.00827	1.00552	1.01145	0.500824	0.579678	0.675457	0.836935	1.03038	1.18954	1.46431	0.299824	0.357968	0.3072	0.551673	no
Pogk	chr1:166379166-166409850	WTLV	TGLV	OK	1.72793	1.48683	2.24607	1.74838	1.76378	1.88011	1.79477	1.96928	1.68061	1.64746	1.76235	2.10121	1.93475	2.05883	1.82943	1.9121	2.39877	2.17466	-0.141504	-0.509301	0.14665	0.350166	no
Fam78b	chr1:167001416-167105085	WTLV	TGLV	OK	0.981263	0.636923	0.633369	0.974108	0.738527	0.931235	1.01019	0.658566	0.463583	0.489982	0.550047	0.669306	0.336938	0.62862	0.431415	0.650739	0.697733	0.99295	0.509046	1.252	0.00025	0.00236014	yes
Uck2	chr1:167222894-167285938	WTLV	TGLV	OK	5.58758	4.8801	6.69257	10.9141	7.40118	5.98579	7.66091	8.38966	5.10483	3.89187	7.60831	4.29446	4.18039	4.41324	5.85521	4.81136	7.34081	8.89887	0.277683	0.839547	0.01735	0.0768951	no
Tmco1	chr1:167308669-167333978	WTLV	TGLV	OK	18.5614	12.2083	13.4581	13.692	14.4499	16.4233	14.757	14.66	11.5853	15.3922	13.5757	12.372	13.533	13.2998	14.376	14.3907	17.6479	17.5686	-0.00649752	-0.0373054	0.91445	0.964587	no
Aldh9a1	chr1:167349990-167368530	WTLV	TGLV	OK	1.83694	3.31086	2.67146	2.44371	2.46913	2.08562	2.23418	1.40821	2.62368	2.34469	2.01041	2.19255	2.68738	2.507	3.36364	2.2142	3.43127	2.95719	-0.214516	-0.681605	0.0532	0.175098	no
Mgst3	chr1:167372383-167393797	WTLV	TGLV	OK	90.488	78.1551	78.7423	57.4297	65.1858	86.823	72.8031	84.007	93.566	123.978	96.9788	96.8403	106.847	93.0426	89.1677	101.175	133.129	94.3107	-0.497336	-2.64004	5e-05	0.000553274	yes
Gm34207	chr1:167423355-167466780	WTLV	TGLV	OK	0	0.243107	0	0.13174	0.245337	0	0.500358	0	0.571857	0.981152	0.137319	0.279248	0.87991	1.19839	0.502579	0.518948	1.00059	0.372467	-1.42566	-0.575748	0.08815	0.249099	no
Lrrc52	chr1:167423355-167466780	WTLV	TGLV	OK	1.67283	1.87702	1.226	2.87611	0.391911	1.93304	2.73091	1.97987	0.456754	0.597078	0.584956	0.669124	0.870135	0.510497	0.401419	1.24348	0.857946	2.24295	1.38644	1.79659	5e-05	0.000553274	yes
Rxrg	chr1:167598361-167639623	WTLV	TGLV	OK	13.0782	10.0987	11.5519	10.6853	11.4268	13.6986	14.2604	11.9672	12.0668	15.4465	12.4798	17.3589	16.6096	14.5385	13.6856	12.9963	18.9502	14.9001	-0.346893	-1.58994	5e-05	0.000553274	yes
Pbx1	chr1:168119363-168432264	WTLV	TGLV	OK	5.48586	5.22985	5.25046	5.21076	5.36058	5.40765	6.25149	5.91223	5.1751	5.72554	5.23501	5.3259	5.49748	4.54275	5.47639	5.33948	6.90267	6.65379	-0.0529773	-0.251015	0.4783	0.708984	no
Rgs5	chr1:169655500-169695813	WTLV	TGLV	OK	100.619	75.2801	89.1565	97.8479	97.0449	90.5361	92.1007	93.7156	82.8386	83.0797	92.0125	88.8276	84.8579	94.4939	91.8831	87.1527	113.325	109.338	-0.0516684	-0.342781	0.3334	0.578777	no
Rgs4	chr1:169741476-169747642	WTLV	TGLV	OK	4.82915	2.84966	3.57061	4.66864	4.90447	5.55093	5.20587	5.88845	3.45554	5.06907	5.46526	6.77499	3.92921	4.33401	4.08727	4.0082	6.1298	5.61267	-0.127152	-0.517522	0.13885	0.338024	no
Hsd17b7	chr1:169949534-169969240	WTLV	TGLV	OK	3.51791	3.4597	3.10987	2.53763	2.38815	2.51907	2.66167	2.83202	1.57974	1.38833	2.20922	2.0691	2.10871	2.19172	2.30625	2.21558	2.85355	3.66136	0.359624	1.11222	0.00265	0.0174829	yes
Ddr2	chr1:169969408-170110843	WTLV	TGLV	OK	3.50327	2.80508	3.05064	2.83401	3.24046	2.61506	2.66726	3.62766	2.17141	2.22627	2.08162	2.29898	2.72896	2.3155	2.34658	2.62641	3.1467	3.77249	0.261679	1.23551	0.00045	0.00392555	yes
Uap1	chr1:170141222-170174964	WTLV	TGLV	OK	9.29327	7.72499	6.67618	6.77551	10.0785	9.75907	8.92904	6.94941	7.52206	8.34952	8.49729	9.67164	7.68466	6.57072	9.74699	9.19007	11.2445	10.2442	-0.134413	-0.574806	0.10765	0.28622	no
Uhmk1	chr1:170199255-170215435	WTLV	TGLV	OK	3.49779	3.13053	3.80915	4.34071	3.9278	2.83637	4.20367	3.37104	3.59365	2.87212	3.71441	3.32542	4.37829	3.8308	4.00007	3.08388	4.89147	4.54207	-0.106918	-0.335159	0.34305	0.586918	no
Gm7694	chr1:170298192-170308493	WTLV	TGLV	OK	1.97389	1.63299	1.9569	1.40859	1.69842	1.87038	1.26895	2.20258	1.62666	1.46024	1.14829	1.7035	1.65413	1.77425	1.73948	1.51164	2.03044	2.09038	0.0419756	0.133105	0.7063	0.85849	no
Nos1ap	chr1:170314699-170589849	WTLV	TGLV	OK	1.92838	1.46245	2.00639	1.63286	1.2257	2.24437	1.58771	1.68582	1.12866	1.30692	1.95233	1.66933	2.0338	1.10401	1.31328	1.93807	2.27158	2.54947	0.1665	0.372951	0.28805	0.532397	no
Olfml2b	chr1:170644422-170682789	WTLV	TGLV	OK	19.3358	11.1683	15.3444	13.4738	16.3016	16.118	17.4941	17.8299	1.94274	1.35052	3.56767	2.59455	2.35943	2.82486	2.65905	1.4956	3.12926	18.9163	2.59574	10.4815	5e-05	0.000553274	yes
Atf6	chr1:170704456-170867787	WTLV	TGLV	OK	15.1864	15.0786	14.9557	15.7176	14.1612	13.6715	14.7783	14.9176	12.5193	11.6153	13.8626	11.4115	12.6786	11.3877	11.6969	11.7044	15.8866	17.7952	0.163679	0.998266	0.00495	0.0290588	yes
Dusp12	chr1:170874186-170885878	WTLV	TGLV	OK	0.78288	1.20556	0.489552	1.73483	1.23599	0.514277	1.54543	0.85068	1.11209	1.53927	0.991607	1.87927	1.09284	1.3709	1.27271	1.02804	1.8379	1.3768	-0.416746	-0.726711	0.03545	0.131248	no
Fcgr2b	chr1:170960557-170976071	WTLV	TGLV	OK	4.09098	4.07109	4.53795	4.79359	5.22431	5.48661	3.62057	5.43586	4.04927	3.99895	2.46989	2.68455	4.02811	3.79055	3.53117	3.67462	4.09864	4.97107	0.278409	0.779069	0.0267	0.106773	no
Fcgr3	chr1:171051168-171065936	WTLV	TGLV	OK	6.65259	6.72964	7.07065	10.5416	9.39119	9.52943	6.33026	9.41962	4.73046	6.66877	5.73155	5.76738	4.21363	5.78376	4.78235	5.24674	6.26821	9.07875	0.534439	1.76784	5e-05	0.000553274	yes
Cfap126	chr1:171113740-171126967	WTLV	TGLV	OK	1.18878	0.758422	1.30785	1.08511	0.647272	1.2383	0.989908	1.32566	0.721515	0.975456	0.804266	1.17443	0.52866	0.650308	1.26648	1.20039	1.28199	1.3687	0.0944194	0.105127	0.6984	0.853007	no
Sdhc	chr1:171129156-171150603	WTLV	TGLV	OK	122.758	105.61	106.221	95.7983	114.953	115.141	113.595	112.263	118.968	117.995	98.0354	120.315	116.74	115.663	108.525	111.927	145.997	131.526	-0.150589	-0.931333	0.0088	0.0456558	yes
Pcp4l1	chr1:171173263-171196268	WTLV	TGLV	OK	83.1524	61.5255	65.5606	56.6031	64.0024	71.8493	72.613	67.3589	59.7926	65.203	61.3399	61.5598	69.5728	62.2222	65.6919	61.8104	81.4881	80.4708	-0.0181232	-0.110045	0.75145	0.882596	no
Tomm40l	chr1:171213931-171226379	WTLV	TGLV	OK	6.11541	5.24333	5.37414	5.09413	7.19427	5.87803	5.61892	6.6656	5.47643	5.4733	4.78219	5.20777	6.40825	5.25466	5.70639	5.34668	7.2101	7.15418	-0.0112336	-0.0473457	0.8913	0.953876	no
Apoa2	chr1:171213931-171226379	WTLV	TGLV	OK	0.214505	0.397294	0.251507	0.713444	0.0921271	0.674629	1.63988	0.217563	0.468532	0.762881	0.673742	0.333449	1.22447	0.196363	1.62e-94	1.48822	1.01341	0.716324	-0.500535	-0.219449	0.37895	0.622061	no
Fcer1g	chr1:171229571-171234349	WTLV	TGLV	OK	9.29263	5.70851	5.69982	8.48903	7.90445	7.79294	4.23516	7.25156	7.02631	7.34796	6.59887	5.18474	4.39316	5.62802	5.0773	4.10912	8.42472	9.15675	0.120207	0.298983	0.39675	0.640267	no
Ndufs2	chr1:171234852-171247122	WTLV	TGLV	OK	298.856	268.149	277.016	274.884	283.415	285.099	299.286	284.384	274.613	293.787	268.772	285.464	307.531	284.814	280.52	282.885	367.59	338.755	-0.117859	-0.785763	0.02495	0.101386	no
B4galt3	chr1:171270327-171276895	WTLV	TGLV	OK	2.10432	1.81931	2.5952	1.60664	2.312	2.22057	2.60033	2.17156	1.94164	2.17557	2.512	1.47059	2.68273	2.12582	2.33327	1.40241	2.90362	2.82004	-0.0421375	-0.11584	0.7401	0.877871	no
Ppox	chr1:171276990-171281192	WTLV	TGLV	OK	1.4213	1.45102	2.00504	1.14365	1.33703	1.77885	1.9472	1.39425	1.65696	0.557839	1.05187	1.48924	1.06416	1.1054	0.774934	0.891551	1.59865	2.11683	0.405054	0.829613	0.01665	0.0746882	no
Usp21	chr1:171281948-171287961	WTLV	TGLV	OK	3.12166	2.25799	1.84952	2.05038	2.21712	3.17383	2.82609	2.93346	1.68674	1.47778	1.96484	2.48853	1.35685	2.40665	1.67164	1.69352	2.98222	3.41055	0.19362	0.571887	0.1096	0.289841	no
Ufc1	chr1:171288563-171294982	WTLV	TGLV	OK	22.5804	16.0438	14.6432	13.8591	16.5116	18.3222	19.8617	15.011	14.1991	13.0052	12.113	14.5972	17.2484	16.6006	15.8449	15.5981	19.6027	20.8196	0.0868861	0.351133	0.31465	0.559951	no
Dedd	chr1:171320600-171358170	WTLV	TGLV	OK	3.30906	2.74825	2.87354	3.39728	3.36172	2.87096	3.3685	3.55222	3.1987	3.15309	2.93128	3.4076	2.96476	3.6758	3.36073	3.46972	4.33775	3.75249	-0.2091	-0.484507	0.16555	0.378633	no
Nit1	chr1:171320600-171358170	WTLV	TGLV	OK	7.04897	5.78026	5.85667	5.3219	5.79167	7.18177	6.1986	4.98244	5.5844	5.13431	5.07639	4.21645	7.17494	5.20974	5.68692	5.39001	8.10904	8.19645	0.0154697	0.0364355	0.91845	0.966617	no
Pfdn2	chr1:171320600-171358170	WTLV	TGLV	OK	33.8392	31.4231	24.9368	32.0257	33.0205	28.353	34.2656	27.9252	29.1596	34.4625	34.9224	30.7335	30.6155	33.4276	39.2398	40.9233	44.1734	36.7394	-0.265851	-0.81637	0.0198	0.0849526	no
Klhdc9	chr1:171358448-171360798	WTLV	TGLV	OK	0.674284	0.894486	0.338862	0.969451	0.270807	0.921183	0.782431	0.390878	0.736431	0.515721	0.808401	0.410986	0.786259	0.661405	1.15574	0.668295	0.936474	0.782549	-0.259058	-0.377764	0.283	0.526364	no
Arhgap30	chr1:171388959-171410240	WTLV	TGLV	OK	0.851308	0.945807	1.05174	1.00977	0.897499	1.36656	0.653723	1.15664	0.81355	0.895285	0.845214	0.794543	0.744511	0.765461	1.00682	0.919081	1.14208	1.24394	0.123255	0.337664	0.3362	0.580486	no
Usf1	chr1:171411312-171418759	WTLV	TGLV	OK	3.92195	3.55716	3.55803	3.95768	3.59415	4.01787	4.7764	3.71024	2.68637	3.39906	3.37017	4.17598	3.16692	2.79466	2.99487	3.26502	4.75944	5.74919	0.272567	0.893332	0.01225	0.0594849	no
F11r	chr1:171437560-171464593	WTLV	TGLV	OK	5.31562	4.69724	5.83106	5.03338	6.05263	5.13807	4.80658	6.08831	4.12007	4.25359	4.73685	3.62753	4.69288	4.26673	4.27929	4.02212	5.77838	6.69742	0.212939	0.839732	0.0179	0.0788894	no
Alyref2	chr1:171503477-171504750	WTLV	TGLV	OK	0.608481	1.41259	0.963247	1.1023	0.969372	0.737073	0.755915	1.60493	0.89716	0.912168	1.08514	0.454326	0.642749	0.501362	1.1097	0.844307	1.03283	1.20739	0.225292	0.332288	0.3429	0.586914	no
Cd48	chr1:171681419-171705257	WTLV	TGLV	OK	1.17863	1.29216	0.569088	1.81418	0.909593	0.834442	0.728794	1.12534	0.305947	1.04379	0.218212	0.887422	0.932083	1.02555	0.809325	0.64776	0.996011	1.3093	0.394564	0.504086	0.1243	0.315322	no
Cd84	chr1:171839696-171890718	WTLV	TGLV	OK	1.09825	1.07736	1.02703	1.0888	1.02539	0.801272	0.935066	1.33341	0.322925	0.69093	0.439184	0.629599	0.612697	0.439529	0.59501	0.432436	0.863544	1.54713	0.841253	1.58696	5e-05	0.000553274	yes
Ncstn	chr1:172066012-172122332	WTLV	TGLV	OK	7.9495	6.09617	6.07316	7.27305	8.18698	8.15513	6.91153	7.97295	4.56011	5.12547	5.19628	5.92521	6.33049	5.84987	4.84574	6.38293	7.7999	9.2467	0.245483	0.587579	0.0978	0.267671	no
Copa	chr1:172066012-172122332	WTLV	TGLV	OK	17.8544	15.7917	16.2918	14.8646	18.5275	17.0247	17.4034	17.9387	16.0099	15.775	16.4126	16.2507	16.3262	15.3617	16.9946	16.1582	21.5758	20.9606	-0.0417307	-0.224001	0.5242	0.742339	no
Pex19	chr1:172126742-172136497	WTLV	TGLV	OK	16.5596	13.2268	15.9039	15.8249	18.0134	13.1427	16.4021	14.577	13.668	16.2232	15.958	16.7072	18.9891	16.3719	15.1278	15.8791	20.8436	18.7486	-0.152825	-0.786241	0.02465	0.100685	no
Dcaf8	chr1:172148014-172196393	WTLV	TGLV	OK	30.2159	27.1217	26.1707	27.1592	28.4003	28.8685	29.6082	26.7189	26.4981	28.6805	24.829	26.8563	28.2677	30.0276	27.7073	27.2223	35.8202	33.5253	-0.095522	-0.587525	0.09485	0.261961	no
Pea15a	chr1:172196727-172206781	WTLV	TGLV	OK	18.2797	11.3866	17.1329	18.6166	16.9095	16.8724	15.0836	16.5908	15.8937	14.6359	15.5638	15.0029	16.3073	16.7082	16.6582	16.5213	20.5831	19.4729	-0.0799974	-0.42212	0.23285	0.468034	no
Casq1	chr1:172206821-172219895	WTLV	TGLV	OK	0.584589	0.14476	0.4113	0.549121	0.693917	0.559051	1.37798	0.430317	0.681034	1.12674	1.634	1.37182	0.960976	1.53079	1.30365	1.23419	1.91529	0.835752	-1.19641	-1.86395	0.00015	0.00149861	yes
Atp1a2	chr1:172271708-172298064	WTLV	TGLV	OK	81.4959	71.5347	71.5546	70.0085	70.0638	76.0627	76.4276	77.0295	83.5098	79.7691	78.6477	84.7376	89.4389	87.1273	87.0011	82.1057	107.864	88.1831	-0.290636	-1.93697	5e-05	0.000553274	yes
Gm39704	chr1:172271708-172298064	WTLV	TGLV	OK	0.867021	0.644092	0.813348	2.09422	0.487501	1.98995	0.994244	0.351824	0.946932	1.11407	1.45526	0.739847	1.49866	0.63501	0.499328	1.8905	1.41474	1.22846	-0.203683	-0.0394047	0.84905	0.93284	no
Igsf8	chr1:172312366-172319843	WTLV	TGLV	OK	2.195	1.36856	1.54434	1.57793	2.40959	1.31944	2.09757	1.14518	1.2329	1.37664	1.18421	1.30444	0.903356	1.46409	1.35442	1.55393	1.80762	2.21214	0.29135	0.736431	0.03415	0.128079	no
Pigm	chr1:172376530-172384099	WTLV	TGLV	OK	1.05538	0.771978	0.883578	0.827775	1.07742	1.13502	0.785984	0.983321	0.79398	0.946997	0.742216	0.605313	0.896838	0.852933	1.04414	0.801161	1.08696	1.12788	0.0533118	0.173591	0.6233	0.806917	no
Slamf9	chr1:172458568-172478421	WTLV	TGLV	OK	1.10576	1.05477	0.499481	2.01706	1.75046	1.38792	1.86899	1.22432	0.905761	2.46448	0.819212	0.810898	1.15894	1.0399	0	1.40724	1.53514	1.75078	0.18963	0.308399	0.374	0.617621	no
Tagln2	chr1:172500245-172507375	WTLV	TGLV	OK	14.414	11.7438	15.0889	16.0629	20.0803	16.7947	16.7296	17.7038	14.5362	15.9664	11.7027	13.1362	14.8492	13.9039	13.5173	14.1765	18.0776	19.5275	0.111308	0.497764	0.1605	0.371029	no
Dusp23	chr1:172630768-172632974	WTLV	TGLV	OK	3.48626	1.8926	2.45283	2.32111	2.51311	3.38526	2.87023	2.61171	3.749	2.29724	2.30687	2.34559	2.31772	2.99528	3.44927	3.4553	3.79669	3.23317	-0.231791	-0.590874	0.0909	0.254198	no
Pydc3	chr1:173673627-173698392	WTLV	TGLV	OK	1.52098	0.959975	0.659568	1.0901	1.1575	1.04778	0.88331	1.21542	0.406731	0.697231	1.06387	0.902315	1.25274	0.245545	0.502398	1.03378	0.896875	1.05669	0.236577	0.433001	0.2225	0.455986	no
AI607873	chr1:173723426-173741831	WTLV	TGLV	OK	4.07412	3.51794	2.33302	2.96478	3.41701	3.04717	3.39433	3.49092	2.77175	2.67017	1.99357	2.17053	1.99541	2.76265	2.03073	1.90205	2.86227	3.81435	0.414277	1.47863	5e-05	0.000553274	yes
Ifi204	chr1:173747292-173767069	WTLV	TGLV	OK	6.07204	3.45544	3.76794	3.82326	4.12129	3.60088	2.71526	4.6001	2.42928	3.19495	3.37416	2.49648	2.00208	2.10813	1.94581	2.84059	2.10735	3.30376	0.648682	1.80271	5e-05	0.000553274	yes
Mndal	chr1:173857219-173880375	WTLV	TGLV	OK	10.4263	7.67115	7.47665	9.30785	9.13142	7.29023	7.39157	7.75101	6.56292	6.82789	7.69159	6.75375	6.25503	6.80276	5.05198	6.22669	7.31703	8.72645	0.254136	0.968968	0.00525	0.0305171	yes
Mnda	chr1:173896338-173914047	WTLV	TGLV	OK	6.00852	5.35708	4.57734	6.25308	5.22234	4.77583	5.32338	5.94614	4.26773	5.04082	4.18536	3.48559	4.59352	3.99718	3.02644	4.50366	1.13635	1.48698	0.387985	0.71529	0.0417	0.147685	no
Ifi203	chr1:173920399-173942848	WTLV	TGLV	OK	3.73598	3.11666	3.73769	5.1506	4.00926	3.97819	3.7541	3.83513	2.86981	3.57235	2.97121	3.59804	2.84539	3.35975	3.77237	3.0332	5.59872	6.0735	0.11743	0.515212	0.14035	0.340275	no
Ifi205	chr1:174011997-174031755	WTLV	TGLV	OK	8.03584	7.2548	6.55276	9.61896	6.60004	7.01127	9.69457	9.43656	7.28852	6.50621	6.44355	5.14368	6.74844	6.37031	3.47982	6.58365	4.74373	6.02735	0.345503	1.0918	0.0016	0.0116399	yes
Spta1	chr1:174172775-174248449	WTLV	TGLV	OK	1.52499	1.6595	1.425	1.17519	1.54819	1.80777	1.38899	1.51906	1.4747	1.4118	1.12484	1.66899	1.60172	1.75244	2.27377	1.70038	2.57428	2.12819	-0.27454	-1.17376	0.00095	0.00746681	yes
Fh1	chr1:175601377-175625635	WTLV	TGLV	OK	116.156	96.268	104.359	82.6891	100.397	100.187	108.213	98.7437	110.836	112.081	101.918	110.726	118.239	116.396	106.594	110.066	142.799	120.001	-0.250944	-1.60179	5e-05	0.000553274	yes
Chml	chr1:175662420-175692902	WTLV	TGLV	OK	1.33283	1.08423	1.27873	1.82917	1.82707	1.29567	1.51577	1.3521	1.61206	1.73383	1.24797	1.28067	1.2799	1.7446	1.45906	1.27732	1.86961	1.70688	-0.131372	-0.450618	0.2033	0.432213	no
Cep170	chr1:176729071-176814177	WTLV	TGLV	OK	3.89548	3.42687	4.05023	3.38707	4.44544	4.15031	4.20618	4.41264	3.26036	3.66657	3.36322	3.96537	3.3129	4.58893	3.64211	3.39759	4.96533	5.04118	0.0218725	0.106307	0.7629	0.888835	no
Sdccag8	chr1:176814659-177370748	WTLV	TGLV	OK	2.35901	2.75228	1.56845	2.11954	2.49931	2.52968	2.71709	2.446	2.24555	2.20803	1.85887	2.43666	1.89957	1.73329	2.78205	2.97801	3.49199	3.20588	-0.12333	-0.243891	0.47495	0.706231	no
Akt3	chr1:176814659-177370748	WTLV	TGLV	OK	5.50185	5.78248	4.7017	4.46736	7.07033	6.13245	5.6465	6.32497	3.37119	3.43584	4.11935	4.97127	4.64494	5.3962	4.7821	5.30612	6.49437	7.22375	0.153558	0.502146	0.1462	0.349444	no
Zbtb18	chr1:177442355-177450764	WTLV	TGLV	OK	6.65405	6.02979	6.40913	5.07674	7.3615	6.02902	6.06179	6.61213	6.49818	7.37536	6.84691	6.45578	7.10631	5.7946	5.65922	6.31668	8.48589	7.52144	-0.174055	-0.834415	0.0173	0.0768175	no
Adss	chr1:177763175-177796695	WTLV	TGLV	OK	2.09647	1.87877	1.16997	2.1478	1.92198	1.80232	1.81442	1.26522	1.72538	1.27612	1.47586	0.768616	1.86304	1.42091	1.78239	1.3371	2.25267	2.44588	0.118715	0.334145	0.35015	0.594334	no
Desi2	chr1:178187416-178252598	WTLV	TGLV	OK	2.45845	2.49036	2.99958	2.65647	3.26742	2.57285	2.85192	2.95912	1.86232	2.2366	1.9479	2.93724	2.38992	2.74535	2.75382	2.39712	3.14809	3.42711	0.122513	0.467382	0.1811	0.401092	no
B230369F24Rik	chr1:178314002-178315735	WTLV	TGLV	OK	0.978937	0.553329	0.349367	0.685374	0.558405	0.569844	0.85414	0.431781	0.511339	0.638051	0.759045	0.68099	0.776573	0.857257	0.490246	0.421844	0.822732	0.735497	-0.161703	-0.240031	0.4922	0.720484	no
Cox20	chr1:178318282-178337810	WTLV	TGLV	OK	52.9214	34.8818	38.545	32.0808	35.9754	40.5563	42.7079	43.9741	40.4386	45.7633	43.0586	47.3336	43.2811	50.8847	50.4601	47.2222	54.6902	49.5562	-0.142218	-0.203545	0.5686	0.772301	no
Hnrnpu	chr1:178318282-178337810	WTLV	TGLV	OK	46.8805	42.692	44.1142	44.7109	47.6125	48.2746	45.1527	48.174	43.088	40.1634	42.7379	41.2058	46.4756	44.7399	43.9617	40.7223	56.2157	55.6532	-0.0145068	-0.0882845	0.80855	0.912454	no
Efcab2	chr1:178405880-178483250	WTLV	TGLV	OK	35.6047	28.0915	26.9565	25.6754	31.1449	31.9562	33.0785	30.1091	22.5948	24.4661	21.0591	25.2194	24.9804	24.326	25.7586	22.0242	31.151	36.179	0.215872	1.24836	0.0003	0.00278329	yes
Smyd3	chr1:178955030-179518053	WTLV	TGLV	OK	1.27669	1.99941	2.2372	1.38554	2.20203	1.57213	1.73653	2.92461	2.63155	1.66193	2.23719	1.79087	2.19881	2.19248	1.51933	2.24972	3.16967	2.90207	-0.12725	-0.265201	0.4389	0.677951	no
Tfb2m	chr1:179528051-179546305	WTLV	TGLV	OK	7.55205	7.30923	6.72398	7.73982	8.86444	8.15118	8.42945	8.34322	7.5824	9.01552	8.16901	8.63716	9.34068	8.77441	7.71803	7.70977	10.0927	8.8179	-0.194812	-0.857201	0.0151	0.0696638	no
Cnst	chr1:179546345-179627473	WTLV	TGLV	OK	16.9056	14.4535	14.7347	13.2179	15.5159	15.5253	16.5126	16.0346	13.6689	11.9711	12.0385	13.4167	14.0811	14.2928	13.4737	12.4152	17.7951	18.8952	0.0865338	0.434657	0.22045	0.453356	no
Sccpdh	chr1:179668028-179687189	WTLV	TGLV	OK	13.5199	11.3072	12.3826	10.791	10.9866	11.5063	12.6711	11.1827	11.4411	7.78872	9.33952	9.1371	11.9977	9.55688	8.85571	8.97404	13.1281	14.6677	0.159987	0.730537	0.0397	0.142652	no
Ahctf1	chr1:179695296-179804015	WTLV	TGLV	OK	2.78523	2.75436	2.89568	2.15008	2.85474	2.76959	2.73724	2.64894	2.87099	2.37346	2.14194	2.51463	2.7979	2.60375	2.39279	2.43115	3.51831	3.45794	-0.0249683	-0.117517	0.73125	0.873178	no
Cdc42bpa	chr1:179959967-180196020	WTLV	TGLV	OK	6.12907	5.74798	5.57147	5.92477	6.14364	6.19259	5.95164	7.15789	5.72501	5.16368	6.43155	5.01465	5.89791	5.75176	6.55963	4.98221	7.85331	7.78276	-0.0130194	-0.0342149	0.92445	0.968327	no
Adck3	chr1:179959967-180196020	WTLV	TGLV	OK	95.3202	79.0198	81.8404	72.5057	92.4029	86.1929	84.9771	83.7822	96.3229	92.6101	96.2638	102.543	105.327	102.503	95.7766	93.4346	126.386	100.496	-0.330699	-1.91594	5e-05	0.000553274	yes
Psen2	chr1:180227003-180276471	WTLV	TGLV	OK	3.08573	1.8202	2.08583	1.60307	2.04101	1.31554	1.73439	2.12995	1.34786	2.06002	1.40888	1.58742	2.28527	2.16039	2.16045	2.15246	2.72485	2.69154	-0.0177445	-0.0454685	0.89205	0.954062	no
Itpkb	chr1:180326968-180424802	WTLV	TGLV	OK	13.5408	14.4778	14.6062	15.2946	16.3208	16.7917	14.3701	17.7185	13.2426	14.6976	13.4107	12.8612	15.1504	15.7338	16.0129	14.992	18.5653	18.0938	-0.0371135	-0.189993	0.5925	0.787758	no
Parp1	chr1:180568974-180601254	WTLV	TGLV	OK	10.0925	8.77936	8.15673	8.46593	9.12939	10.8634	9.51569	8.80707	9.1872	10.2775	9.25809	9.67234	9.99375	10.4986	9.60106	10.1097	13.1508	11.4279	-0.202595	-1.06287	0.0025	0.016755	yes
Acbd3	chr1:180726042-180754204	WTLV	TGLV	OK	8.63044	5.8117	8.08682	6.69996	9.9369	7.37661	7.7331	8.4924	5.61635	6.87228	6.73275	7.73871	6.79478	7.86473	5.96905	6.44003	9.03976	9.40628	0.0573399	0.276778	0.429	0.668409	no
H3f3a	chr1:180802559-180813605	WTLV	TGLV	OK	29.9183	23.1647	25.6962	21.7264	29.2073	29.2047	27.7892	27.6065	28.1223	25.8574	24.1824	26.0306	29.3433	27.3091	26.4636	22.3092	31.9822	31.6521	-0.0149687	-0.0712138	0.83825	0.928172	no
Sde2	chr1:180851150-180868113	WTLV	TGLV	OK	1.72328	1.84331	1.76496	1.90998	2.16685	2.06521	2.41807	1.48265	1.88211	2.21897	2.35699	2.30349	2.07379	2.01702	1.2144	1.18909	2.61741	2.4499	-0.0954136	-0.303055	0.3919	0.634691	no
Pycr2	chr1:180904273-180908088	WTLV	TGLV	OK	2.19236	2.20908	2.02382	1.26753	1.61737	1.6505	1.42642	2.12942	1.47741	1.64827	1.468	1.64191	1.47819	1.879	1.43275	1.15579	2.10572	2.35763	0.163026	0.366608	0.294	0.539433	no
Tmem63a	chr1:180942261-180975104	WTLV	TGLV	OK	4.09211	2.87809	3.3711	3.04847	3.82001	4.18024	3.70474	3.56941	2.41346	2.13748	3.20822	2.61457	3.19538	2.72194	3.10955	2.76438	3.98548	4.51233	0.17912	0.686735	0.04705	0.160437	no
Ephx1	chr1:180989555-181017569	WTLV	TGLV	OK	12.083	13.8974	11.4346	15.8728	15.614	14.5081	16.2459	16.7737	9.18774	9.85123	8.62825	9.39319	8.50904	8.65568	9.62085	10.9252	12.4156	17.5331	0.497922	2.23025	5e-05	0.000553274	yes
Nvl	chr1:181087137-181144220	WTLV	TGLV	OK	6.2306	4.36018	3.29894	3.75329	3.37371	3.27547	4.30875	2.69255	3.7442	4.28186	4.17638	4.82383	3.69141	4.41739	3.93013	4.2202	5.747	5.08868	-0.175517	-0.469856	0.1861	0.408722	no
Cnih4	chr1:181150344-181168994	WTLV	TGLV	OK	7.66399	7.40279	5.88372	7.53375	8.16523	7.41796	8.44913	8.73051	5.98824	5.9104	6.35371	6.36686	6.44406	8.32825	6.487	6.50841	8.81791	9.56497	0.117324	0.492404	0.15665	0.365774	no
Wdr26	chr1:181173225-181236369	WTLV	TGLV	OK	25.0375	22.4732	19.9102	23.3427	24.3893	22.5289	26.6596	25.6927	19.3013	19.5499	18.9477	19.9011	19.1385	21.6181	19.662	18.839	25.6611	28.3355	0.143026	0.739091	0.03745	0.136685	no
Lbr	chr1:181815314-181842401	WTLV	TGLV	OK	4.55125	3.27441	4.08248	3.58735	4.24683	3.68282	3.77305	3.54706	3.44127	3.51966	2.83617	3.48535	3.69812	2.93805	4.27108	3.00166	4.58816	4.76328	0.0540413	0.220333	0.5279	0.744455	no
Enah	chr1:181896383-182019980	WTLV	TGLV	OK	20.3282	20.5947	21.1835	29.2211	24.6361	19.8263	24.2963	24.68	17.9453	17.0609	19.4432	19.2991	19.0783	18.7774	19.8927	19.2188	24.809	27.7648	0.162389	0.957763	0.00605	0.0341764	yes
Srp9	chr1:182124736-182132415	WTLV	TGLV	OK	10.3574	9.03114	10.0835	7.51152	7.92968	9.51087	9.94146	8.11036	9.24168	9.76672	8.81909	7.76567	8.36319	9.68351	8.57037	8.98566	18.1925	17.1884	-0.0819031	-0.3616	0.3061	0.550952	no
Degs1	chr1:182275769-182282759	WTLV	TGLV	OK	11.1674	9.49117	7.62825	8.002	11.3119	8.84785	9.11762	8.87254	7.65752	9.71352	9.32656	8.67364	10.0646	9.39668	8.01337	11.1226	11.9887	11.0789	-0.113853	-0.496491	0.1616	0.372698	no
Fbxo28	chr1:182313101-182341606	WTLV	TGLV	OK	1.9086	2.15761	2.14075	1.82342	2.00891	2.52621	2.00891	2.48339	2.03919	2.25102	2.04572	2.19808	2.01874	2.21582	1.85853	1.68603	2.66681	2.59834	-0.0375204	-0.141866	0.68675	0.846911	no
Trp53bp2	chr1:182409166-182462436	WTLV	TGLV	OK	3.11084	2.5113	2.32801	2.13966	2.38784	2.16767	2.61423	2.79108	1.86097	1.90822	1.68909	1.96756	2.02656	1.47409	1.81558	1.75076	2.63892	3.18651	0.272027	1.01778	0.0034	0.0213361	yes
Capn2	chr1:182467258-182517483	WTLV	TGLV	OK	15.4839	13.3164	15.24	16.5075	15.4497	14.7171	15.4577	16.0184	13.543	13.7252	12.9175	13.6711	13.3893	15.9491	13.7295	12.7212	17.5996	18.1603	0.0452508	0.239184	0.49815	0.724265	no
Disp1	chr1:183086263-183221535	WTLV	TGLV	OK	1.98682	1.86563	2.13154	1.40431	1.47404	1.65683	1.60177	1.6327	1.33505	1.43657	1.4158	1.27195	1.3925	1.40655	1.65859	1.69654	1.96288	2.10545	0.101153	0.347254	0.31985	0.565293	no
Brox	chr1:183276341-183324501	WTLV	TGLV	OK	4.80558	3.40792	3.6358	3.7003	4.96468	4.23396	4.49565	3.9697	3.37895	3.81024	3.59713	4.39706	4.16551	3.93029	4.22363	3.54495	5.49471	5.20559	-0.0779811	-0.259161	0.4602	0.695503	no
Aida	chr1:183276341-183324501	WTLV	TGLV	OK	3.13576	2.29509	2.45948	2.72613	2.65868	3.02364	3.27004	2.51767	2.75119	2.96399	2.4767	2.66245	2.1059	2.71743	2.11439	2.51753	4.53501	4.90556	0.113313	0.34475	0.32725	0.572893	no
Mia3	chr1:183326235-183369565	WTLV	TGLV	OK	12.7873	11.0288	10.7594	10.8798	10.8047	11.1896	11.739	11.8751	9.84536	10.2989	10.2482	10.7636	11.5115	10.9332	10.7289	10.2208	13.8735	13.7031	-0.0178328	-0.105157	0.7639	0.88927	no
Taf1a	chr1:183388884-183410201	WTLV	TGLV	OK	2.54278	2.36951	2.19856	2.18421	3.25085	2.45087	2.05655	2.6225	2.27881	2.43476	3.30035	3.29054	3.60213	3.46707	3.30695	3.27133	4.46465	3.28427	-0.442976	-1.4474	5e-05	0.000553274	yes
Dusp10	chr1:184034460-184075636	WTLV	TGLV	OK	1.94697	1.84991	2.09449	0.927442	1.9705	2.16015	2.00939	1.79079	1.45049	1.77036	1.50275	1.82758	1.72109	2.05642	1.92518	1.98788	2.33058	2.24797	-0.052063	-0.148481	0.67395	0.839325	no
Hlx	chr1:184727142-184739520	WTLV	TGLV	OK	2.54351	1.95789	2.27617	2.11708	2.57174	4.12867	2.68646	3.39512	2.15656	2.11432	1.47455	1.89198	2.15326	2.38988	2.02306	1.82435	2.64855	3.26353	0.301235	0.860059	0.0141	0.0662386	no
2019-03-02	chr1:184813067-184854483	WTLV	TGLV	OK	7.57989	8.18357	10.5881	9.28662	6.41527	9.60021	7.1024	7.0795	8.55764	7.60376	9.7332	10.3452	10.038	9.9613	10.5417	10.763	13.4764	11.7079	-0.202952	-0.717208	0.0401	0.143436	no
C130074G19Rik	chr1:184871925-184883036	WTLV	TGLV	OK	3.90801	4.42781	3.83325	3.80943	3.91563	3.54925	4.22779	3.71519	3.5971	4.47412	3.37771	3.53928	3.91804	4.07285	4.55325	4.48231	5.18373	4.71129	-0.137868	-0.51952	0.1393	0.338631	no
Mark1	chr1:184896423-184999571	WTLV	TGLV	OK	1.75361	1.2182	1.635	1.039	1.55351	1.70835	1.15882	1.90587	1.20806	1.05279	1.59707	1.11865	1.21171	1.60139	1.0853	0.925741	1.80505	2.05245	0.185313	0.589345	0.09145	0.255133	no
Rab3gap2	chr1:185204086-185329416	WTLV	TGLV	OK	3.36697	2.79191	2.70012	3.00651	2.9569	3.00265	3.17253	2.91807	2.63163	2.32159	2.52846	2.62992	2.75698	2.80546	3.15743	2.47799	3.79179	3.85794	0.0249514	0.0688194	0.8451	0.931286	no
Iars2	chr1:185204086-185329416	WTLV	TGLV	OK	19.977	19.0662	16.8184	18.0981	20.2617	19.6395	20.2303	18.2772	18.3919	19.7318	18.0497	19.3715	18.141	20.7402	18.758	19.2839	25.0844	23.3115	-0.105749	-0.545391	0.1184	0.305656	no
Bpnt1	chr1:185329523-185357772	WTLV	TGLV	OK	5.59188	4.28685	4.45137	4.20696	4.90892	4.88739	4.97503	5.88578	3.33016	3.88549	3.38327	2.37077	3.92456	3.9998	2.88132	2.7959	5.07394	6.32517	0.317998	1.14808	0.0011	0.00849341	yes
Eprs	chr1:185361553-185428355	WTLV	TGLV	OK	24.7519	24.5947	21.9201	26.0522	24.0369	22.9245	24.335	25.0932	21.6866	20.5161	21.7423	22.5246	21.1894	21.7046	21.8108	20.7707	28.2525	29.4012	0.0574988	0.35425	0.31485	0.560138	no
Gm35546	chr1:186587069-186614781	WTLV	TGLV	OK	4.37489	3.37441	4.27306	3.98789	3.31278	4.58893	5.92442	4.59146	2.04756	2.81141	3.56006	3.15852	3.46931	2.95804	2.93594	3.22973	4.03377	5.51582	0.451448	1.28228	0.00035	0.00316767	yes
Tgfb2	chr1:186622786-186706220	WTLV	TGLV	OK	2.21278	2.09985	1.77602	2.20366	2.99576	1.95611	2.20824	2.72763	0.886866	1.34984	1.63207	1.20022	1.1153	1.33196	1.48667	1.16844	1.79485	2.80311	0.643164	2.24036	5e-05	0.000553274	yes
Rrp15	chr1:186721085-186749358	WTLV	TGLV	OK	2.90071	2.33445	3.09908	2.91935	3.68482	3.02057	2.21757	2.41952	3.66087	2.82993	2.36675	2.95653	3.03312	2.71463	3.09363	1.91663	4.30181	3.89019	-0.145101	-0.366284	0.29685	0.542269	no
Gpatch2	chr1:187009613-187369044	WTLV	TGLV	OK	3.74472	5.49097	3.3177	3.85927	2.47661	3.10428	3.74371	4.346	2.79922	3.26708	2.82943	3.83875	3.73384	2.68243	3.52196	3.37237	4.73481	5.15327	0.122182	0.312067	0.3695	0.61319	no
Esrrg	chr1:187521682-188214884	WTLV	TGLV	OK	7.72279	6.15349	6.15829	6.28588	7.1607	5.98501	6.93005	6.46144	6.1558	5.9641	6.76092	5.92053	6.05584	6.42321	5.83018	6.13922	8.29652	8.1186	-0.0312748	-0.161163	0.64695	0.821907	no
Kctd3	chr1:188971094-189007868	WTLV	TGLV	OK	1.68332	1.38694	1.48853	1.45781	2.45096	1.61817	1.47915	1.99344	1.32632	1.16855	1.47108	1.25913	1.9468	1.7755	1.50709	1.25542	2.30107	2.43782	0.0832812	0.261708	0.44485	0.6818	no
Cenpf	chr1:189640605-189688105	WTLV	TGLV	OK	20.4763	17.6337	15.272	5.76117	16.4596	15.5899	15.181	19.0794	7.16897	7.02843	3.43253	6.69625	6.54076	8.03436	7.95196	6.95068	8.80038	18.7261	1.08942	6.52671	5e-05	0.000553274	yes
Ptpn14	chr1:189728214-189876695	WTLV	TGLV	OK	4.16737	4.30453	4.15195	4.94327	4.56255	5.35139	5.2045	4.98814	4.72413	5.2622	4.34411	5.17437	5.86915	5.74682	5.55277	4.39264	6.93203	5.84191	-0.246837	-1.03074	0.0032	0.0202855	yes
Smyd2	chr1:189880491-189922376	WTLV	TGLV	OK	25.6685	20.8324	22.8702	19.0912	23.1834	24.9078	21.8877	24.7952	26.1189	26.7353	25.7299	26.99	30.2525	27.5785	25.2957	21.5889	34.2019	27.2777	-0.326357	-1.65325	5e-05	0.000553274	yes
Prox1	chr1:190118034-190217279	WTLV	TGLV	OK	13.9003	11.032	14.997	9.93331	13.7799	12.7177	9.82864	15.5221	12.2714	14.5535	15.4476	17.0738	14.9532	14.1333	16.1066	12.5391	18.302	14.8101	-0.305418	-1.65987	5e-05	0.000553274	yes
LOC102632463	chr1:190118034-190217279	WTLV	TGLV	OK	0.125631	0.208882	0.296771	0	0.118499	0.671419	0.113544	0.23842	0	0.256692	0.393103	0.265734	0.624135	0.109058	0.678189	0.251246	3.2709	2.45699	-0.412795	-0.321053	0.36515	0.609133	no
Rps6kc1	chr1:190772878-190912140	WTLV	TGLV	OK	2.30586	2.13935	2.87799	2.31168	2.45508	2.4405	2.50636	2.39164	1.81413	2.31183	2.05329	2.03279	2.61894	2.52589	2.3124	2.03233	3.08285	3.10463	0.0101576	0.0363474	0.91665	0.965887	no
Angel2	chr1:190925107-190946962	WTLV	TGLV	OK	4.31883	2.92794	4.66808	3.46851	3.8623	3.59074	3.69862	3.63575	3.02193	3.84202	2.8572	3.56651	2.66853	3.36033	2.91192	2.96689	4.24884	4.69317	0.143496	0.548721	0.1136	0.297295	no
Tatdn3	chr1:191045825-191084558	WTLV	TGLV	OK	3.35464	3.71986	3.05023	4.45754	3.55498	2.28407	2.63525	5.13503	2.30348	2.25731	2.28627	2.11943	2.73926	3.79551	2.72339	3.34278	4.00632	4.55564	0.185377	0.440873	0.196	0.423358	no
LOC108167755	chr1:191120901-191125328	WTLV	TGLV	OK	1566.34	2112.83	2202.92	1849.78	1590.77	2294.45	1924.37	1527.8	1907.01	1810.21	1749.15	1505.33	1436.67	2112.79	2100.19	2445.41	47066.8	39312.3	-0.259728	-1.47723	5e-05	0.000553274	yes
Atf3	chr1:191170295-191183333	WTLV	TGLV	OK	1.17474	0.681792	1.93715	0.775877	2.30495	1.93089	2.91175	1.37794	0.641508	0.825491	1.65597	0.587363	1.02233	1.04188	0.669502	0.836847	1.3014	2.03127	0.642317	1.36894	0.0002	0.00193127	yes
D730003I15Rik	chr1:191224407-191225688	WTLV	TGLV	OK	0.157859	1.02611	0.740432	0.63549	0.887593	0.905775	0.150852	0.800708	0.344816	1.69032	0.496799	0.16838	0.909539	0.433562	0.303043	0.625826	0.875219	0.794879	-0.138909	-0.113454	0.7397	0.877859	no
Nenf	chr1:191306796-191318118	WTLV	TGLV	OK	33.1676	34.6493	30.3432	31.9418	32.6896	35.8202	30.6024	32.632	32.6333	32.7596	33.2943	32.7858	42.9706	32.5901	31.2871	30.1808	44.2439	40.0523	-0.143595	-0.618479	0.0766	0.225511	no
Tmem206	chr1:191325964-191397041	WTLV	TGLV	OK	0.738222	0.896044	0.759132	0.663498	0.946005	0.638986	1.00193	0.749637	0.67383	0.825548	0.766275	1.07768	0.793601	0.615608	0.703811	0.606987	0.941883	0.91126	-0.0476845	-0.0539125	0.87815	0.945878	no
Ppp2r5a	chr1:191325964-191397041	WTLV	TGLV	OK	20.4219	17.5421	18.0163	15.9899	19.8079	18.7403	18.7033	21.8127	13.4387	14.8723	13.1801	16.9416	17.1658	14.62	16.9399	12.8571	28.0486	32.2916	0.203228	1.16779	0.0008	0.00644193	yes
Ints7	chr1:191575635-191623690	WTLV	TGLV	OK	1.43202	1.25918	0.935107	1.41922	1.2411	1.32932	1.29262	1.1595	0.896985	1.03143	0.98248	0.900033	1.32825	1.05383	1.10443	1.38642	1.60444	1.70559	0.0882015	0.291397	0.4103	0.650682	no
Lpgat1	chr1:191717565-191784255	WTLV	TGLV	OK	21.1532	18.8166	19.6249	22.799	21.4103	18.2727	23.1527	20.8288	17.9142	15.7765	18.8684	19.2906	18.5114	17.6873	17.3022	17.2157	23.2709	25.0692	0.107391	0.547257	0.1211	0.310399	no
Slc30a1	chr1:191894071-191913247	WTLV	TGLV	OK	3.9019	4.31784	3.82191	5.57748	4.29181	6.37492	4.77926	3.29877	4.99923	3.79411	4.63287	6.02512	4.20683	3.21171	4.56631	3.71737	5.6265	5.33016	-0.0780573	-0.161929	0.6407	0.818312	no
Traf5	chr1:191997202-192092599	WTLV	TGLV	OK	0.56865	0.993974	1.01983	0.807957	0.940398	1.08762	1.08682	0.98408	0.401863	0.501446	0.666717	0.356795	0.289095	0.398108	0.577929	0.430988	0.711355	1.26197	0.827033	1.3162	0.00045	0.00392555	yes
Gm3934	chr1:191997202-192092599	WTLV	TGLV	OK	22.0361	20.817	20.9404	18.6307	21.74	17.1819	17.8116	20.2539	20.7735	20.9892	19.7436	20.3076	20.7772	20.2075	21.8141	21.9304	2.8508	2.2312	-0.353547	-0.504204	0.158	0.367693	no
Rcor3	chr1:192098545-192151025	WTLV	TGLV	OK	7.01545	7.74977	7.68697	5.7356	8.43063	9.40648	7.11739	7.19614	6.34511	8.19501	6.57329	7.20607	9.0893	7.66646	8.59828	8.36355	10.7008	9.30407	-0.201782	-0.710718	0.0441	0.153655	no
Sertad4	chr1:192844487-192856856	WTLV	TGLV	OK	1.30801	0.670177	0.89887	1.38457	1.83966	2.16038	1.74566	0.960896	0.640276	0.748363	0.922673	0.79359	0.736317	0.991044	0.930769	0.938769	1.11129	1.69193	0.606432	1.48152	5e-05	0.000553274	yes
LOC108167768	chr1:192885673-193035862	WTLV	TGLV	OK	0.424517	0.197805	0.189109	0.156985	0.148652	0.0986035	0.171798	0.0858248	0.103949	0.191289	0.0332812	0.282	0.19041	0.321914	0.373035	0.186042	1.6345	1.40371	-0.219602	-0.235536	0.5113	0.735161	no
Diexf	chr1:193104402-193130251	WTLV	TGLV	OK	1.48569	1.23419	0.874014	1.43721	1.37735	1.42247	1.48248	1.61372	0.935404	0.976115	1.43484	0.966291	1.62829	1.14289	1.80143	1.69149	1.92318	1.77521	-0.115506	-0.28054	0.4232	0.663314	no
A130010J15Rik	chr1:193173468-193201546	WTLV	TGLV	OK	0.919635	0.988059	0.891519	1.18517	1.18802	1.0724	1.05348	0.781231	1.02317	0.873389	1.04105	1.25986	0.949103	0.818092	0.831493	0.886909	1.12586	1.07872	-0.0617131	-0.135034	0.69625	0.851788	no
Hsd11b1	chr1:193221639-193264049	WTLV	TGLV	OK	4.15114	4.53293	3.80081	2.85399	3.10629	3.80663	3.8582	5.01886	4.59584	3.53372	3.72935	3.64447	3.94792	3.95655	4.14823	4.69296	5.71078	4.92133	-0.214641	-0.626013	0.07135	0.215086	no
G0s2	chr1:193272159-193273188	WTLV	TGLV	OK	28.8784	23.1339	23.4897	18.0114	25.6331	31.9928	34.7873	27.7488	30.9848	25.9138	33.068	38.504	37.4963	38.1681	29.9639	33.4594	43.3433	31.8561	-0.444237	-2.01552	5e-05	0.000553274	yes
Lamb3	chr1:193294352-193343878	WTLV	TGLV	OK	1.39332	1.24592	1.12955	0.727086	1.08002	1.41471	1.10134	1.41348	1.76598	1.52878	0.81201	0.990778	1.40394	1.55908	1.13925	1.77309	1.96522	1.54605	-0.346096	-1.04073	0.00325	0.0205255	yes
Gm31870	chr1:193655515-193749308	WTLV	TGLV	OK	0	0	0	0	0	0.556979	0.556571	1.77254	0.954154	1.55911	0.916476	0	1.95753	0.799817	0	0.288625	1.03591	0.461169	-1.16753	-0.843313	0.1113	0.293353	no
Plxna2	chr1:194619828-194816869	WTLV	TGLV	OK	2.33333	2.45496	2.4611	3.54065	2.71638	3.28069	3.79995	2.22458	3.9631	3.29207	3.78289	3.41633	3.05967	3.29787	3.27095	3.3378	4.70947	3.62687	-0.37684	-1.95327	5e-05	0.000553274	yes
Cd34	chr1:194938820-194976959	WTLV	TGLV	OK	25.0783	21.0817	21.1616	25.6389	29.2194	25.8249	23.9512	27.1745	21.1976	16.9314	20.7135	17.3723	17.8035	19.5095	22.1579	18.5802	24.6246	29.016	0.236748	1.28483	0.0003	0.00278329	yes
Gm16897	chr1:194938820-194976959	WTLV	TGLV	OK	0.1167	0.512915	0.48762	0.469725	0.443574	0.366268	0.39382	0.265205	0.318257	0.345659	0.491642	0.283006	0.527243	0.243546	0.168902	0.382125	1.03299	1.19439	0.209444	0.210722	0.55455	0.764008	no
A330023F24Rik	chr1:195017398-195037908	WTLV	TGLV	OK	0.913447	1.40117	0.907829	0.667525	0.733497	1.03577	1.02516	0.903788	0.669842	0.694278	0.857585	0.934957	1.19045	0.919889	1.02939	0.8536	1.17612	1.20765	0.0381657	0.110385	0.7547	0.884246	no
Mir29b-2	chr1:195017398-195037908	WTLV	TGLV	OK	0	132.917	0	0	0	0	45.6201	167.259	0	0	0	53.4304	0	0.020409	0	0	8.61182	51.0745	2.56821	2.95902	0.0118	0.0577024	no
Mir29c	chr1:195017398-195037908	WTLV	TGLV	OK	0	0	34.3792	7.56413	41.6547	8.61e-05	0	0	0	61.3397	16.1663	0	0.000152579	0	159.855	0	37.3489	11.125	-1.74726	-2.29784	0.04115	0.146219	no
Cr1l	chr1:195038970-195131590	WTLV	TGLV	OK	5.61925	4.56311	4.47767	5.31143	6.67102	5.32405	6.81186	5.04938	5.3639	6.58871	5.26994	4.82087	4.98366	5.42271	6.38355	7.01381	10.6992	9.30506	-0.201416	-0.700186	0.0476	0.161613	no
Fam171a1	chr2:3114223-3227809	WTLV	TGLV	OK	4.78571	4.68748	4.46029	5.05325	4.40857	4.13429	4.17502	3.82006	3.89318	3.78853	2.92623	4.4752	3.50599	4.65789	4.10989	3.48761	4.96582	5.29079	0.0914527	0.370005	0.29195	0.536421	no
Nmt2	chr2:3284211-3332978	WTLV	TGLV	OK	1.71181	1.46418	1.79502	1.81928	2.0374	1.40633	1.8383	1.75072	1.45398	1.0934	1.82552	1.00092	1.54596	1.66196	1.4154	1.47076	1.82886	1.86473	0.0280209	0.0811209	0.81635	0.916069	no
Rpp38	chr2:3284211-3332978	WTLV	TGLV	OK	1.58337	1.32961	1.2762	1.70621	1.85076	2.03977	1.05688	1.04183	1.72558	1.63497	1.66959	1.601	1.97239	1.39079	1.50435	1.87911	2.39591	2.30336	-0.0568308	-0.081943	0.8159	0.915855	no
Meig1	chr2:3409042-3422648	WTLV	TGLV	OK	0	0.30346	0.191596	0.493343	0.765621	0.46879	0.468446	0.331517	1.78462	2.79947	2.05697	3.83443	0.627649	0.747965	1.25472	0.485839	2.33932	0.524454	-2.1572	-1.55463	0.0023	0.0156721	yes
Dclre1c	chr2:3424061-3474986	WTLV	TGLV	OK	0.84112	0.830455	0.724744	1.13134	0.850346	1.04463	0.836319	1.02101	0.868616	0.720925	0.438947	1.45532	0.823317	0.440094	0.933574	0.807813	1.47961	1.37855	-0.102071	-0.191006	0.5253	0.743256	no
Hspa14	chr2:3488848-3512936	WTLV	TGLV	OK	8.01373	5.47963	6.50338	5.30119	7.83417	5.17881	6.76235	5.04731	4.92839	5.72839	5.64133	7.55883	6.77509	6.29912	7.86698	4.63255	8.84638	8.04246	-0.13745	-0.525294	0.13605	0.33361	no
Cdnf	chr2:3512965-3526376	WTLV	TGLV	OK	8.68462	8.56194	6.69315	7.5562	7.25592	8.40686	10.5841	11.2124	9.80915	6.62399	6.14119	9.30855	9.70154	8.32952	10.1836	10.2567	11.4345	10.3858	-0.138781	-0.335992	0.3363	0.580489	no
Fam107b	chr2:3704811-3782142	WTLV	TGLV	OK	1.37126	1.10906	1.40048	1.20199	1.80319	1.56517	1.29085	0.987229	1.03903	0.866354	1.1833	1.01442	1.04697	1.27566	1.3799	1.03715	1.53035	1.69238	0.145193	0.382278	0.26305	0.50236	no
Frmd4a	chr2:4017687-4614043	WTLV	TGLV	OK	4.24702	3.17113	3.44	3.52204	4.72202	4.15643	4.06628	3.54232	3.31227	4.15772	3.50743	3.89711	3.98324	3.80744	4.67055	3.9997	5.33499	4.81517	-0.147899	-0.703698	0.046	0.157857	no
Prpf18	chr2:4622057-4652144	WTLV	TGLV	OK	7.25951	6.83627	6.78374	6.02187	6.77828	7.61401	6.50559	6.39801	7.18411	5.38889	6.48656	6.07631	7.03134	6.29926	8.01613	6.55619	8.81547	8.37138	-0.0745727	-0.353752	0.3146	0.559951	no
Bend7	chr2:4717830-4802224	WTLV	TGLV	OK	0.898553	0.918641	0.998071	1.58516	1.37735	1.19867	1.14972	1.39133	0.814296	0.44658	0.912648	0.841625	0.998285	0.757371	1.22427	0.796944	1.29729	1.5941	0.297245	0.512524	0.14355	0.345273	no
Sephs1	chr2:4881563-4916456	WTLV	TGLV	OK	1.85955	1.12729	1.39086	1.54165	1.69818	1.59003	1.33592	1.43589	0.971449	1.36181	1.04844	1.07527	1.69256	1.58291	1.57739	1.17669	1.81385	1.89222	0.0610265	0.188717	0.5915	0.78707	no
Phyh	chr2:4918995-4938743	WTLV	TGLV	OK	192.628	168.575	172.954	180.305	184.668	192.885	201.115	174.911	212.508	219.949	220.965	220.03	242.169	236.105	219.046	217.904	287.762	218.218	-0.399101	-2.62878	5e-05	0.000553274	yes
Optn	chr2:5020518-5064112	WTLV	TGLV	OK	38.7022	35.8184	38.4819	46.0294	43.8105	45.593	43.5625	41.7124	54.1538	52.9596	56.1378	53.5351	58.1984	52.8286	46.5116	54.3964	68.6605	49.3558	-0.476259	-2.81313	5e-05	0.000553274	yes
Cdc123	chr2:5794293-5844968	WTLV	TGLV	OK	15.0503	12.1282	16.7179	12.1872	14.3207	14.2177	12.8194	16.2084	12.7905	16.2381	11.0086	18.2274	17.6246	14.6127	15.2727	15.6172	20.1587	17.4273	-0.210053	-0.876699	0.01265	0.0610016	no
Nudt5	chr2:5845033-5870820	WTLV	TGLV	OK	2.36051	1.40007	1.07898	0.975804	1.25515	1.51207	1.91595	0.913607	0.673433	0.883205	0.843226	0.715109	1.02556	0.921485	0.990043	0.573282	1.40434	1.85582	0.402161	0.757179	0.0313	0.12021	no
Sec61a2	chr2:5870976-5895427	WTLV	TGLV	OK	1.93244	1.67562	1.06206	1.32439	2.0741	1.75712	1.66619	1.58816	1.84315	1.66428	1.37908	1.35317	1.73014	1.5969	1.59647	1.63679	2.40537	2.17126	-0.147724	-0.375387	0.27045	0.511455	no
Dhtkd1	chr2:5895522-5943217	WTLV	TGLV	OK	0.361772	0.386467	0.180415	0.239093	0.340794	0.159134	0.284061	0.402662	0.485734	0.272102	0.161902	0.359606	0.334951	0.226421	0.392175	0.373429	0.910908	0.832446	-0.129948	-0.274238	0.41015	0.650682	no
Upf2	chr2:5951446-6056703	WTLV	TGLV	OK	7.04891	6.88289	5.82967	5.56956	7.38041	6.10956	6.34352	6.34519	5.65668	5.54778	5.87952	5.43156	6.08099	6.26552	5.52459	5.89988	7.99835	8.14031	0.025382	0.11976	0.7351	0.874801	no
Proser2	chr2:6098492-6130293	WTLV	TGLV	OK	0.735669	0.998898	0.51293	0.840426	0.596704	0.627473	0.893021	0.662117	0.608689	0.490317	0.460227	0.44537	0.668268	0.644786	0.438948	0.551776	0.704863	0.89607	0.346268	0.717238	0.03855	0.139367	no
Echdc3	chr2:6188464-6321611	WTLV	TGLV	OK	4.93779	4.09664	4.08157	5.45831	4.81693	4.29632	5.33745	4.76285	4.4204	4.20382	4.88272	5.48275	5.48016	5.33576	5.67193	3.73062	6.59027	5.74327	-0.198465	-0.694044	0.04995	0.16724	no
Usp6nl	chr2:6322718-6448296	WTLV	TGLV	OK	0.778428	0.742729	1.11348	0.867509	0.938917	0.752969	0.973729	0.909719	1.06244	0.791422	0.788356	0.701345	0.819529	1.01441	0.816885	0.903619	1.2504	1.18287	-0.0800998	-0.227043	0.50725	0.732096	no
Celf2	chr2:6539693-7396228	WTLV	TGLV	OK	3.53811	3.81809	2.98455	3.91927	3.63123	3.62677	3.69048	3.02792	3.5677	3.60558	4.26082	3.46384	3.76312	3.45568	3.7939	3.96395	5.0751	4.3828	-0.211585	-0.996981	0.0044	0.0263266	yes
Taf3	chr2:9906150-10048609	WTLV	TGLV	OK	3.35472	3.4438	3.23668	3.34778	3.95956	4.0339	3.08408	3.54684	2.72088	2.85706	2.76193	2.7932	3.54093	3.00647	2.94831	3.04434	3.92697	4.29435	0.129026	0.546274	0.123	0.312896	no
Atp5c1	chr2:10056029-10080518	WTLV	TGLV	OK	506.951	421.612	427.473	393.699	443.618	448.925	455.723	446.445	465.567	499.77	462.366	503.814	489.492	484.058	481.252	453.373	704.559	599.522	-0.232908	-1.55383	5e-05	0.000553274	yes
Kin	chr2:10080598-10092701	WTLV	TGLV	OK	4.20233	3.57326	3.44278	3.29615	2.967	4.45741	3.22731	4.26876	2.78212	4.38716	4.80334	2.83474	5.63584	4.22062	3.6138	5.47746	5.68486	4.86339	-0.225162	-0.663826	0.06005	0.190233	no
Itih5	chr2:10153535-10256529	WTLV	TGLV	OK	2.15886	1.45655	1.61187	1.34932	2.56109	1.75003	1.87628	1.87088	1.15671	0.859372	1.15891	0.82755	1.12325	1.18061	1.26274	1.1785	1.51351	2.30457	0.606598	2.38611	5e-05	0.000553274	yes
Prkcq	chr2:11171903-11301226	WTLV	TGLV	OK	0.486638	0.920897	0.698011	0.656778	0.579633	0.6865	0.346942	0.742288	0.748756	0.81243	0.764965	0.498191	0.804625	0.871838	1.09237	0.524844	1.30256	0.899938	-0.533451	-1.09279	0.00215	0.0148553	yes
Pfkfb3	chr2:11471429-11554071	WTLV	TGLV	OK	1.72459	1.66374	0.598503	1.13073	1.30512	1.16542	1.74856	0.964176	1.07334	1.64828	0.880933	0.846171	0.741805	1.03562	1.18994	1.3112	1.55439	1.70696	0.135086	0.399062	0.23825	0.474014	no
Rbm17	chr2:11585438-11603199	WTLV	TGLV	OK	11.2522	7.90475	10.0393	8.56722	8.96295	9.68459	7.12955	7.32046	8.2552	6.46959	9.10962	6.18373	7.86913	9.31611	7.27859	6.27921	14.9895	15.321	0.0315588	0.137805	0.6955	0.851311	no
Il15ra	chr2:11705168-11733985	WTLV	TGLV	OK	4.67368	4.54073	3.58973	4.55837	4.9106	4.88336	4.419	4.4357	4.44138	4.44911	4.67897	5.9507	5.71539	4.75871	4.24174	4.41533	6.41729	5.39362	-0.25071	-0.725589	0.0245	0.100315	no
Fbxo18	chr2:11742572-11777588	WTLV	TGLV	OK	9.37438	8.84846	8.37269	7.10094	8.04266	7.80201	8.48754	7.58304	7.49043	7.06648	8.20156	7.65591	8.49945	8.71518	7.4912	7.43751	10.4701	10.1882	-0.0393683	-0.195178	0.57695	0.777128	no
Ankrd16	chr2:11777752-11790327	WTLV	TGLV	OK	1.32978	1.33014	0.780384	0.980158	0.90784	1.14886	1.1809	0.806503	1.20597	0.923358	1.10328	1.03496	0.493373	1.24267	0.848484	0.855484	1.30843	1.33238	0.0261762	0.0511596	0.87095	0.943449	no
Itga8	chr2:12106631-12312315	WTLV	TGLV	OK	0.665538	0.336108	0.217705	0.387779	0.687893	0.424168	0.390518	0.568556	0.471827	0.525121	0.465444	0.572896	0.608833	0.605508	0.605094	0.451326	0.868564	0.71272	-0.285297	-0.727141	0.0373	0.136348	no
Fam188a	chr2:12347262-12419490	WTLV	TGLV	OK	1.91465	1.77542	1.43499	1.3694	1.07081	1.29131	1.31446	1.63127	1.05565	0.848058	1.213	1.28236	1.94129	1.47394	1.65273	1.25735	1.96227	1.89441	-0.0507801	-0.113731	0.7364	0.875524	no
Pter	chr2:12924033-13010864	WTLV	TGLV	OK	3.17121	1.86588	2.69592	3.24684	2.93931	3.24194	2.843	3.33954	2.13923	3.02515	2.08051	2.38893	1.46632	3.11041	2.2335	2.06428	3.44648	3.90442	0.179985	0.478596	0.16845	0.382937	no
Rsu1	chr2:13076966-13271416	WTLV	TGLV	OK	8.96069	7.05752	7.31673	8.45166	9.36446	7.49249	7.93531	7.99566	7.58332	7.2841	6.89014	8.90739	9.23557	6.8721	6.21431	5.34726	10.3998	10.7087	0.0422268	0.167987	0.6334	0.813782	no
Trdmt1	chr2:13509013-13544974	WTLV	TGLV	OK	1.20948	0.94025	1.0668	0.673326	1.11406	1.00369	1.22145	1.08434	1.3792	1.28777	1.44096	0.913193	0.540463	1.54587	1.79355	1.72957	1.96035	1.33637	-0.552791	-0.986714	0.00465	0.027599	yes
Vim	chr2:13574310-13582826	WTLV	TGLV	OK	94.6293	79.1967	89.099	107.534	123.215	100.309	96.9918	111.147	66.5895	62.9339	63.3735	57.3677	68.4028	70.0746	72.9709	68.2244	85.4026	119.071	0.479466	3.02187	5e-05	0.000553274	yes
St8sia6	chr2:13651017-13794734	WTLV	TGLV	OK	0.534829	0.695262	1.18782	1.44712	0.805584	1.02494	1.05769	0.942639	0.71538	0.80793	0.704919	0.82208	0.69491	1.16921	0.46533	0.810222	1.12141	1.2852	0.19668	0.443688	0.20955	0.440149	no
Hacd1	chr2:14026828-14056035	WTLV	TGLV	OK	14.2953	9.4146	9.55407	11.6203	14.2393	12.5565	10.505	11.4986	11.165	11.942	11.2381	12.7393	14.9114	13.2953	11.517	10.851	16.7046	14.8225	-0.172455	-0.623526	0.0787	0.230033	no
Stam	chr2:14070332-14148338	WTLV	TGLV	OK	4.66958	4.10444	3.72673	2.76998	3.58303	3.64708	3.03586	3.26711	2.96959	3.09803	4.02556	3.86537	3.40525	2.26385	3.45137	2.73028	4.58918	4.82213	0.0714331	0.226129	0.51985	0.740238	no
Mrc1	chr2:14229413-14332023	WTLV	TGLV	OK	5.75644	7.53328	6.15276	6.65218	7.23241	6.64981	6.18247	8.37196	5.25771	5.85023	5.81162	4.9447	4.87967	5.10683	5.45201	5.57909	7.32735	8.59269	0.229819	1.1833	0.001	0.00781308	yes
Cacnb2	chr2:14604052-14988811	WTLV	TGLV	OK	18.0563	18.3994	16.5094	13.6559	14.8485	16.5146	19.9663	16.6736	12.775	12.806	11.616	11.4744	13.5248	13.0258	12.8655	14.0604	16.757	20.2575	0.273697	1.52187	5e-05	0.000553274	yes
Arl5b	chr2:15055361-15082456	WTLV	TGLV	OK	1.89024	1.7017	2.50698	2.03286	2.50316	2.30718	2.08245	2.17674	2.09883	1.96175	2.06464	1.37561	2.22378	1.98397	2.15356	1.95548	2.7119	2.71912	0.0038338	0.013076	0.97235	0.987595	no
Plxdc2	chr2:16356209-16761132	WTLV	TGLV	OK	2.77521	2.44871	2.33795	2.32304	2.95828	2.63759	2.90638	2.71408	2.16884	2.16979	2.18345	2.0443	2.22994	2.20493	2.48889	2.43792	3.0495	3.2946	0.111529	0.475564	0.179	0.398605	no
Nebl	chr2:17343029-17731068	WTLV	TGLV	OK	83.227	72.5598	70.8713	61.3229	74.6066	71.3914	74.022	77.5392	59.317	59.8242	58.8052	64.7445	68.3615	65.5024	67.5394	56.8001	80.6669	87.2405	0.113021	0.642128	0.06985	0.211969	no
A930004D18Rik	chr2:18019766-18049026	WTLV	TGLV	OK	0.883138	0.996081	0.57552	0.812078	1.28436	0.719777	0.805319	1.17103	0.610687	0.779678	0.547431	1.15763	0.856093	0.654906	0.65472	0.839102	0.749655	0.832906	0.151926	0.208276	0.51185	0.73531	no
Skida1	chr2:18019766-18049026	WTLV	TGLV	OK	0.689477	0.71438	0.922852	0.61456	0.777693	0.656937	0.46386	0.750339	0.478809	0.637388	0.664411	0.79032	0.721749	0.562619	0.571117	0.554868	0.801694	0.82541	0.0420585	0.0785573	0.82275	0.919444	no
Mllt10	chr2:18055174-18392853	WTLV	TGLV	OK	3.25125	3.77058	2.80736	2.81478	3.0419	3.17939	4.15957	3.59154	3.16494	2.8446	2.95841	3.25221	3.25105	2.959	2.93196	3.37756	4.48634	4.60082	0.0363509	0.10714	0.749	0.88176	no
Dnajc1	chr2:18055174-18392853	WTLV	TGLV	OK	6.81812	4.76047	5.92222	5.83875	6.34334	5.90253	6.16045	6.63843	4.36284	5.23961	4.56225	5.57252	5.68173	5.97599	5.45505	4.79904	7.03315	7.46626	0.0862154	0.281466	0.42535	0.664659	no
Commd3	chr2:18672461-18676216	WTLV	TGLV	OK	42.3322	36.903	47.6135	42.2177	38.5908	39.9322	39.2608	45.1842	37.3226	35.8722	34.439	36.9626	41.573	34.2735	38.0529	32.6326	49.2535	51.9041	0.0756228	0.37662	0.2772	0.519486	no
Bmi1	chr2:18677017-18686629	WTLV	TGLV	OK	10.0568	8.60388	9.05544	9.06375	10.3385	11.2922	10.1363	10.5569	7.56472	8.11852	7.97079	8.40908	7.19934	7.52795	7.38199	7.57039	13.5754	15.599	0.200457	1.06432	0.00305	0.0195759	yes
Pip4k2a	chr2:18842254-18999804	WTLV	TGLV	OK	1.4158	1.27227	1.36911	1.99319	1.31952	2.30378	1.65709	1.23258	1.95241	1.51588	1.67709	1.29414	1.46142	1.12687	0.989951	1.02724	1.93769	1.98372	0.0338705	0.0984527	0.77855	0.898134	no
Msrb2	chr2:19371410-19394976	WTLV	TGLV	OK	21.5654	15.3802	14.8226	17.2749	16.9987	18.0312	19.1256	18.6921	18.4718	18.2309	16.69	17.1673	20.1122	17.2146	20.4796	15.8399	23.143	21.1277	-0.131438	-0.551726	0.11485	0.299572	no
Otud1	chr2:19658061-19660590	WTLV	TGLV	OK	2.60412	2.70421	2.36411	2.16995	3.25383	3.6686	7.19802	3.06788	2.87472	4.07772	3.99493	2.50888	3.09228	2.38409	3.11776	3.91312	4.17987	3.99811	-0.0641378	-0.21806	0.5342	0.747868	no
Etl4	chr2:19909762-20810535	WTLV	TGLV	OK	10.0519	8.16926	9.31644	10.7057	10.0755	10.5109	9.57592	9.87366	10.0897	9.67584	9.77938	10.9862	11.8313	9.99975	11.0352	10.7788	14.0095	11.9883	-0.224773	-1.25329	0.0004	0.00354693	yes
Arhgap21	chr2:20847918-20968640	WTLV	TGLV	OK	17.562	17.4461	16.2079	14.1861	17.6896	14.5229	15.7457	16.2088	13.7158	13.3795	15.3509	13.6478	13.5306	14.0592	16.28	13.6224	18.8118	19.746	0.0699274	0.425063	0.2263	0.460899	no
Gm13375	chr2:20968873-20970348	WTLV	TGLV	OK	6.99592	8.79829	7.493	6.48646	8.31115	6.6903	9.05424	7.60004	7.09925	7.19616	7.39678	6.87463	8.41085	6.15265	7.98406	6.497	9.2652	9.16139	-0.0162558	-0.0588116	0.8642	0.939461	no
Enkur	chr2:21180730-21215009	WTLV	TGLV	OK	1.37268	1.94235	1.91623	1.57885	2.45022	1.50024	2.12379	1.06098	0.285561	0.419953	0.411427	0	0.18831	0.359056	0.439191	0.323925	0.423338	2.22991	2.39711	1.9092	0.00035	0.00316767	yes
Thnsl1	chr2:21180730-21215009	WTLV	TGLV	OK	1.44095	1.06683	1.6578	1.4606	1.56319	1.48968	1.55006	1.71856	0.962709	0.834099	1.53204	1.20037	1.4523	1.21018	1.30837	1.24788	1.57325	1.78283	0.180423	0.450001	0.18305	0.403974	no
Apbb1ip	chr2:22755988-22875653	WTLV	TGLV	OK	1.67218	1.47748	1.24182	1.90731	1.85431	1.49252	0.938015	2.12045	0.852279	0.57811	1.11123	1.01076	0.695838	1.1992	0.882774	0.911534	1.58061	2.2599	0.515773	1.31421	0.00035	0.00316767	yes
Pdss1	chr2:22895503-23040241	WTLV	TGLV	OK	3.99289	2.97682	2.60906	3.51218	3.31478	3.73554	3.90198	2.46451	3.60466	4.79602	3.63652	3.70641	4.62815	2.97546	3.47546	3.15402	5.06143	4.0631	-0.316963	-0.652313	0.0555	0.179915	no
Abi1	chr2:22895503-23040241	WTLV	TGLV	OK	4.99932	3.31799	3.50992	4.65663	3.72154	5.25378	3.8109	4.46819	4.09393	3.68427	3.86408	3.09616	3.68502	4.16574	4.37151	3.69856	5.87455	5.74034	-0.0333409	-0.108609	0.76025	0.887671	no
Acbd5	chr2:23067688-23114513	WTLV	TGLV	OK	4.62935	4.40448	3.54446	4.8266	4.92793	3.80251	4.44437	4.26814	3.2469	3.3709	4.73202	3.66259	4.30016	3.65733	4.21828	3.52938	5.39367	5.60203	0.0546831	0.232084	0.50735	0.732151	no
Yme1l1	chr2:23116538-23199260	WTLV	TGLV	OK	8.85839	6.67489	7.18732	6.61893	8.63677	7.41605	7.13984	7.74595	6.48247	7.7927	7.54062	6.49009	7.21773	7.46822	6.88524	8.46931	10.473	9.62631	-0.121627	-0.630528	0.0753	0.223443	no
Spopl	chr2:23506219-23572129	WTLV	TGLV	OK	6.34402	5.9974	8.14606	5.35369	6.98012	4.00375	4.88151	4.79068	5.26614	4.22817	5.49493	4.05676	3.76194	6.15591	5.90287	4.96339	6.80783	7.34042	0.108668	0.306859	0.3824	0.625039	no
Hnmt	chr2:24002910-24049758	WTLV	TGLV	OK	5.66263	4.8885	4.50943	2.05646	4.95662	4.82633	5.61978	4.51066	4.31723	4.54745	4.03529	4.46124	3.32688	3.521	3.54818	6.03363	5.72034	6.08663	0.0895448	0.267188	0.44825	0.685312	no
Ehmt1	chr2:24790768-24919643	WTLV	TGLV	OK	4.77324	4.44008	4.55222	4.6242	5.31168	4.53321	3.85978	4.32433	4.13898	4.1373	4.1163	4.39474	4.20492	4.54268	4.77048	3.62987	5.78859	5.77114	-0.00435592	-0.0205168	0.952	0.9783	no
Arrdc1	chr2:24925351-24935335	WTLV	TGLV	OK	0.78324	0.484868	0.798697	0.683158	0.612087	0.144142	0.399184	1.05905	0.627304	0.671831	0.328568	0.445558	0.952517	0.389637	0.293671	0.468704	0.751002	0.813739	0.115751	0.141627	0.6194	0.80471	no
Zmynd19	chr2:24949776-24960870	WTLV	TGLV	OK	2.62087	2.79519	2.31257	2.84663	2.89378	2.08451	2.33096	2.39372	1.79965	2.33402	2.30024	1.8268	2.31744	1.98368	2.3164	1.90319	2.97778	3.27309	0.136415	0.439974	0.21155	0.442281	no
Dph7	chr2:24962170-24975098	WTLV	TGLV	OK	0.881071	1.14587	0.506337	0.990556	0.986872	0.898472	0.954613	0.373389	0.769508	0.754903	0.924496	0.618352	0.811933	0.537864	0.623257	0.54018	1.11202	1.27569	0.198096	0.20156	0.51485	0.73704	no
Mrpl41	chr2:24962170-24975098	WTLV	TGLV	OK	10.459	9.971	8.46293	7.66009	8.68512	8.78046	9.40598	8.01563	7.06476	8.40335	8.61722	7.18181	8.39551	7.98609	8.09604	8.47604	10.3865	10.2717	-0.0160423	-0.0696712	0.8414	0.929445	no
Pnpla7	chr2:24975305-25054072	WTLV	TGLV	OK	1.86298	1.96233	1.60383	2.18483	1.95368	2.16073	2.44137	2.1471	1.62654	2.2567	1.49529	2.15503	2.42075	2.34506	2.33927	1.98765	3.03416	2.92156	-0.0545567	-0.205695	0.5447	0.755345	no
Nsmf	chr2:25054369-25062881	WTLV	TGLV	OK	1.63128	1.39139	1.11903	1.60074	1.74279	1.16316	1.11535	2.0535	0.641378	0.894147	1.01163	0.998535	0.802038	1.25185	1.55445	0.760805	1.42289	2.07761	0.546101	1.35718	5e-05	0.000553274	yes
Nrarp	chr2:25180757-25183339	WTLV	TGLV	OK	1.64266	1.90672	2.05463	1.73587	2.07815	2.06835	1.51743	1.9997	1.46515	1.37783	1.92426	1.66454	1.6563	1.80464	1.81322	1.51953	2.12725	2.23164	0.0691189	0.190987	0.59265	0.78778	no
Tor4a	chr2:25192719-25196813	WTLV	TGLV	OK	1.11808	0.789064	1.19183	1.1915	0.950838	1.1901	0.839281	0.919361	0.672431	0.719723	1.01172	0.759412	0.51213	0.819762	0.963514	0.652406	1.16508	1.43619	0.301822	0.764382	0.0299	0.116115	no
Nelfb	chr2:25199711-25211489	WTLV	TGLV	OK	5.43212	3.35456	4.70675	5.33236	5.71746	5.22041	5.01747	3.90906	3.85777	4.72778	3.50893	4.25251	5.06223	3.94422	3.5959	4.03127	5.71785	5.99344	0.0679111	0.267684	0.4435	0.680931	no
Tubb4b	chr2:25212206-25224702	WTLV	TGLV	OK	74.2771	61.3381	64.3971	60.918	64.5449	62.4774	66.3732	71.1822	46.6196	47.6868	53.5559	53.5974	55.3851	49.8931	43.2611	47.5806	55.0224	66.3289	0.26962	1.57441	5e-05	0.000553274	yes
Ndor1	chr2:25244812-25256352	WTLV	TGLV	OK	0.787216	0.923558	0.852405	0.778641	0.871325	1.05599	1.29948	1.165	1.14177	0.730995	0.449755	0.702366	1.14368	0.701261	0.891682	0.709784	1.15049	1.26391	0.135649	0.255757	0.37495	0.618072	no
Tmem203	chr2:25244812-25256352	WTLV	TGLV	OK	1.46465	1.53008	1.82482	1.65832	1.45834	0.962959	1.22469	1.85729	1.09976	2.15644	0.960297	1.26935	1.14277	1.3409	0.527195	0.998003	1.52755	1.78621	0.225686	0.240253	0.48965	0.718085	no
Ssna1	chr2:25271038-25272418	WTLV	TGLV	OK	11.7164	6.39994	9.23625	10.3054	9.3189	10.2631	10.6319	10.1879	5.48414	7.69612	5.78401	9.87186	9.26567	10.0054	9.16698	8.39214	10.9041	11.771	0.110368	0.347715	0.3274	0.572997	no
Anapc2	chr2:25272465-25285916	WTLV	TGLV	OK	9.09662	8.12471	7.70837	8.22324	9.0452	8.72137	9.48915	8.03063	6.1936	8.25338	6.96885	6.54268	6.77937	6.67513	7.50948	7.73112	9.55453	10.6454	0.155968	0.74344	0.0351	0.130197	no
Man1b1	chr2:25332742-25352213	WTLV	TGLV	OK	3.73637	2.66629	3.03003	3.23221	3.58766	2.9219	3.53772	3.38283	2.62479	2.98428	3.30324	2.80747	2.93392	3.04996	3.48037	2.36228	3.95378	4.10975	0.0558188	0.219634	0.52705	0.743971	no
Uap1l1	chr2:25361488-25366097	WTLV	TGLV	OK	1.18324	1.88092	1.79666	1.55391	2.83486	1.77469	1.17434	1.60205	1.37897	1.15207	0.848932	1.54104	1.62238	1.39539	1.24705	1.51188	1.8967	2.35597	0.312831	0.665093	0.05365	0.175894	no
Entpd2	chr2:25395873-25401323	WTLV	TGLV	OK	3.56794	2.65055	4.09575	3.17507	4.7162	3.95082	3.26601	4.19105	2.37909	2.49336	1.65476	3.28496	2.8492	2.09742	1.80247	1.67506	3.29067	4.64667	0.497815	1.50203	5e-05	0.000553274	yes
Npdc1	chr2:25403049-25409494	WTLV	TGLV	OK	2.86785	2.81499	3.32312	3.28506	4.86921	3.78001	4.18007	3.65012	3.10091	2.50754	3.14477	2.66184	3.16932	2.59303	3.46443	2.89682	4.08735	4.66594	0.191005	0.549747	0.1199	0.308527	no
Abca2	chr2:25428603-25448544	WTLV	TGLV	OK	4.80948	4.76077	4.28012	5.2163	5.03466	5.53983	4.13698	5.39883	4.04141	4.60682	4.4885	5.21738	5.09767	4.36613	4.81669	4.60161	6.45504	6.3109	-0.0325806	-0.174354	0.618	0.803792	no
BC029214	chr2:25455119-25461276	WTLV	TGLV	OK	3.86836	2.85341	3.63955	4.14142	2.00895	2.08683	2.58414	3.29391	3.70655	4.00865	3.9802	3.72274	2.48393	3.17415	2.48259	3.91351	4.66779	4.03592	-0.209843	-0.46479	0.16915	0.383751	no
Ptgds	chr2:25466708-25470110	WTLV	TGLV	OK	43.6955	44.8059	51.2697	112.215	70.9391	56.9943	51.1204	57.1266	136.006	142.277	205.218	154.197	158.516	133.78	122.956	164.305	197.54	73.316	-1.42995	-7.85995	5e-05	0.000553274	yes
C8g	chr2:25498649-25505471	WTLV	TGLV	OK	1.25953	1.26707	0.123079	0.127383	0.915565	0.903384	1.30393	0	0	0.78673	0.262729	0.223914	1.20951	0.430553	0.100747	1.05846	0.686176	0.923959	0.429249	0.196619	0.5996	0.791349	no
Fbxw5	chr2:25498649-25505471	WTLV	TGLV	OK	15.113	13.9697	12.398	16.3183	14.8526	14.8977	15.8195	14.8839	14.8797	14.3295	12.2957	12.8887	14.0983	12.6388	13.8312	14.6658	18.2665	18.44	0.0136364	0.0692373	0.848	0.932595	no
Traf2	chr2:25517981-25546940	WTLV	TGLV	OK	2.32633	1.55987	1.90489	1.83296	2.84995	2.19074	1.86089	2.387	1.08511	1.75412	1.73087	0.834076	1.79335	1.3283	1.38848	1.82211	2.07501	2.66512	0.361082	1.07526	0.00315	0.0200545	yes
Edf1	chr2:25557820-25562082	WTLV	TGLV	OK	120.619	104.436	96.5086	104.815	117.532	108.673	104.981	118.756	103.682	113.555	107.348	108.832	119.428	107.309	105.695	104.618	165.671	151.747	-0.126648	-0.722465	0.04015	0.143528	no
Phpt1	chr2:25573430-25574871	WTLV	TGLV	OK	47.4021	46.878	46.956	36.3397	45.0629	47.7861	47.9146	44.2685	49.1545	45.993	44.1616	45.8157	42.8904	39.4803	43.8566	41.5537	56.8589	53.8965	-0.0771942	-0.341641	0.33245	0.577637	no
Rabl6	chr2:25583017-25608488	WTLV	TGLV	OK	24.3148	22.3203	23.8388	25.8755	24.4909	23.0776	24.4774	26.2847	17.0524	17.2628	19.0296	18.2428	18.2753	17.1987	17.2806	15.7719	24.4828	30.825	0.332332	1.93159	5e-05	0.000553274	yes
Tmem141	chr2:25608628-25635444	WTLV	TGLV	OK	11.8763	9.20518	8.00827	8.87138	10.634	10.1387	8.63255	7.59476	8.42663	7.366	11.2123	8.62596	10.818	9.78212	9.41149	7.67794	12.3842	11.6319	-0.0904133	-0.257754	0.4678	0.7009	no
Fcna	chr2:25608628-25635444	WTLV	TGLV	OK	0.525986	0.434101	0.685276	0.470528	0.711985	0.391193	0.837719	0.0592631	0.893614	1.0013	0.245223	0.373996	0.2806	0.214007	0.560973	0.637162	0.866463	0.722951	-0.261241	-0.190038	0.5715	0.774107	no
Bmyc	chr2:25706878-25707721	WTLV	TGLV	OK	3.45727	2.7383	3.81559	2.35377	3.62104	3.98694	2.52645	3.61043	3.3317	2.61316	2.13342	1.84385	2.63646	2.97897	4.0017	2.21719	3.49045	3.87125	0.149387	0.296329	0.39845	0.640898	no
Camsap1	chr2:25926837-25983458	WTLV	TGLV	OK	4.91063	4.324	4.18791	4.33487	5.23914	4.04927	4.49283	4.61896	4.23237	3.85981	4.10374	4.36919	4.23738	4.59294	3.87955	3.77476	6.26037	6.38124	0.0275891	0.140412	0.6903	0.848722	no
Ubac1	chr2:25996957-26021781	WTLV	TGLV	OK	15.8153	13.5263	14.524	14.8178	14.796	13.8731	13.3612	15.7692	12.9233	13.1646	15.2559	16.3953	13.8375	14.5347	13.8061	11.9054	22.328	20.9629	-0.0910137	-0.442773	0.21465	0.446317	no
Nacc2	chr2:26055534-26122811	WTLV	TGLV	OK	4.30981	3.81922	3.96787	3.7528	4.38527	3.80155	4.50131	4.48819	2.82654	2.66394	3.09168	3.18069	3.16487	2.80451	3.09227	2.59642	3.8579	4.99698	0.37324	1.75926	5e-05	0.000553274	yes
C330006A16Rik	chr2:26136806-26140506	WTLV	TGLV	OK	11.3857	8.55655	8.68179	9.53463	9.97095	9.73383	8.90219	9.74651	7.55651	9.03161	8.63459	8.84362	9.01425	9.68852	9.63587	9.4607	11.5785	11.4285	-0.0188073	-0.0873551	0.80475	0.910162	no
Qsox2	chr2:26209123-26237399	WTLV	TGLV	OK	2.0145	1.95141	2.32764	1.96863	1.91454	2.79023	2.03667	1.86618	2.07215	2.31087	2.02014	1.80624	2.60686	2.05666	1.79284	1.62126	2.99489	2.85314	-0.069951	-0.209113	0.5503	0.759834	no
Gpsm1	chr2:26314573-26352110	WTLV	TGLV	OK	12.7932	14.5497	10.9301	12.4336	12.4711	13.2714	16.5232	10.8241	14.5748	14.0426	12.4139	14.5105	15.5893	12.8579	11.4554	13.4398	17.6576	15.4567	-0.192059	-0.881397	0.01185	0.0578991	no
Dnlz	chr2:26314573-26352110	WTLV	TGLV	OK	5.25261	4.27326	3.99331	5.336	5.01276	4.04009	4.44487	4.77843	3.18802	3.13903	3.81025	4.80044	3.62388	3.48912	4.3746	3.62878	5.36919	6.02289	0.165752	0.363413	0.2978	0.542702	no
Snapc4	chr2:26362764-26380665	WTLV	TGLV	OK	1.06523	1.01706	1.26288	0.602436	1.14252	1.63771	1.08848	0.728669	0.800118	0.662918	0.99324	1.41885	0.667322	0.936836	1.16094	1.36715	1.41078	1.52674	0.113955	0.256357	0.43645	0.675578	no
Sdccag3	chr2:26382797-26389316	WTLV	TGLV	OK	13.3686	13.4625	10.5487	11.0575	13.2433	12.7781	11.6026	13.1316	8.88821	11.7489	12.3555	12.0812	10.098	12.3713	10.6122	11.3941	16.2453	16.697	0.0395672	0.161205	0.64345	0.820121	no
Pmpca	chr2:26389347-26409219	WTLV	TGLV	OK	18.6752	19.0862	16.3499	18.9564	18.4817	17.8213	19.0136	20.031	18.3382	16.5489	19.1271	20.3205	22.33	20.4455	19.8594	19.3811	22.5557	20.0598	-0.169185	-0.769314	0.0304	0.117555	no
Inpp5e	chr2:26389347-26409219	WTLV	TGLV	OK	4.05697	3.22005	3.20713	3.15885	4.23123	4.1626	3.24624	4.17955	3.24679	3.36494	3.14949	3.53765	3.83774	3.68579	3.42472	3.07315	7.44021	7.06133	-0.0754022	-0.236096	0.50355	0.729052	no
Sec16a	chr2:26409430-26503822	WTLV	TGLV	OK	6.40405	5.79771	5.63242	6.312	6.35888	5.44142	5.53792	6.47473	5.25375	4.86055	5.26487	5.63528	5.46213	5.71598	5.15143	5.24241	7.30372	7.51277	0.0407143	0.172569	0.62665	0.808976	no
Notch1	chr2:26409430-26503822	WTLV	TGLV	OK	3.35342	3.32674	3.77598	4.04564	3.08301	3.67741	4.20053	3.65666	3.78258	3.30532	3.47371	3.65924	3.79289	3.83857	3.77771	3.47661	4.95741	4.61446	-0.103427	-0.360105	0.2996	0.543742	no
Egfl7	chr2:26581055-26592682	WTLV	TGLV	OK	17.6928	18.4134	17.0094	21.7877	19.2578	19.8871	13.2993	17.8131	17.0068	12.4631	15.9867	15.4569	17.511	15.626	18.3187	16.39	21.4523	22.5593	0.0725907	0.336185	0.33595	0.580486	no
Mir126a	chr2:26581055-26592682	WTLV	TGLV	OK	0	0	0	92.8645	259.409	0	0	187.213	0	0	0	0	0	0	0	0	0	78.0464	inf	#NAME?	0.0001	0.00103854	yes
Agpat2	chr2:26593056-26604417	WTLV	TGLV	OK	5.63953	6.94707	6.68886	8.48492	8.44276	10.1397	7.66513	9.18715	11.2804	13.3389	9.11585	10.2342	10.9609	9.55975	9.11264	9.49212	13.7186	9.55161	-0.522314	-1.98133	5e-05	0.000553274	yes
Fam69b	chr2:26628456-26636497	WTLV	TGLV	OK	3.67122	3.28125	3.17489	3.04821	2.36525	4.38855	3.11359	3.25878	2.25539	1.91639	4.57336	2.15375	2.86441	2.43674	3.34764	2.54703	3.68595	4.10428	0.15509	0.437463	0.20605	0.435399	no
Snora43	chr2:26637175-26640244	WTLV	TGLV	OK	23.9068	66.5997	18.6891	72.1812	52.2749	53.3457	15.2305	40.421	60.924	51.1979	41.7987	51.0005	68.8724	43.7737	38.2452	55.2871	66.0576	51.1721	-0.368369	-0.268451	0.43445	0.674424	no
Snora17	chr2:26637175-26640244	WTLV	TGLV	OK	67.2727	142.787	247.925	149.918	148.6	174.621	183.676	116.993	220.419	257.265	262.123	358.783	272.248	175.967	313.636	209.551	389.308	239.019	-0.703784	-1.20587	0.0019	0.013426	yes
Surf6	chr2:26890771-26902813	WTLV	TGLV	OK	2.36842	2.50619	2.49737	1.55213	2.46036	2.44931	2.51769	2.47717	1.56405	1.97576	2.00787	1.79189	1.63966	2.04224	2.69628	2.33373	2.67793	2.98806	0.158088	0.478533	0.1747	0.391981	no
Med22	chr2:26905261-26910672	WTLV	TGLV	OK	3.7152	2.85587	2.8148	2.16845	3.77026	3.09971	2.47926	3.68114	3.86152	3.71045	3.34094	2.14707	3.59498	3.93997	2.95039	2.77818	4.34093	3.76229	-0.206392	-0.513814	0.14265	0.344018	no
Rpl7a	chr2:26910724-26913312	WTLV	TGLV	OK	22.6319	19.3283	18.4516	18.7236	21.4623	21.4792	23.2252	21.1221	20.6462	21.7211	20.5291	19.461	20.2203	20.0564	19.9354	17.7096	137.209	133.528	-0.0392266	-0.231452	0.51215	0.73531	no
Surf1	chr2:26913377-26953496	WTLV	TGLV	OK	10.8719	9.13431	10.0078	10.3569	10.4983	7.38199	11.1481	10.3346	12.0826	10.1291	11.3046	8.47046	11.2224	14.155	11.1721	11.1423	14.8927	12.2499	-0.28183	-0.573859	0.1006	0.273311	no
Surf2	chr2:26913377-26953496	WTLV	TGLV	OK	7.42446	5.86851	5.32648	6.56239	6.32403	6.82989	10.0342	8.37913	4.9698	5.39764	5.59457	6.38421	6.78901	6.32365	6.67254	5.20526	7.2638	7.69536	0.0832637	0.13969	0.69375	0.850665	no
Surf4	chr2:26913377-26953496	WTLV	TGLV	OK	21.9564	18.5476	19.466	21.3852	22.2234	20.514	21.8797	20.354	18.4345	18.5378	19.1966	17.7072	22.1325	18.3618	18.037	17.1359	24.0545	24.6984	0.0381127	0.173567	0.62165	0.805751	no
Rexo4	chr2:26953562-26964537	WTLV	TGLV	OK	3.10286	2.38655	2.62786	3.65903	2.74116	3.64269	2.87529	3.47563	2.8925	3.3917	2.6108	2.31006	2.19718	2.61797	2.63703	2.8579	3.85143	4.06018	0.0761498	0.249811	0.4824	0.711421	no
Cacfd1	chr2:27009854-27021089	WTLV	TGLV	OK	5.86048	8.34579	4.45989	8.00375	5.12139	6.07383	6.92526	7.93662	6.95936	8.47089	8.57276	6.88492	6.05039	6.07749	7.20519	7.51311	9.36337	8.12669	-0.204361	-0.546508	0.11675	0.30266	no
Adamtsl2	chr2:27079339-27108613	WTLV	TGLV	OK	0.835899	0.557391	0.703728	1.9414	0.758922	0.758397	1.4879	1.02194	0.819308	0.436062	1.29045	0.685857	0.535139	0.510182	0.570981	0.701018	1.10931	1.36139	0.295415	0.679653	0.04915	0.165734	no
Vav2	chr2:27262103-27427608	WTLV	TGLV	OK	1.46843	1.34109	1.74802	1.69982	1.84755	1.67206	1.84775	1.58347	1.469	1.15191	1.5405	1.57834	1.50308	1.64429	1.10678	1.59067	2.16099	2.21486	0.0355256	0.124425	0.72785	0.871053	no
Brd3	chr2:27445575-27507657	WTLV	TGLV	OK	5.98077	6.00374	5.91573	4.82619	6.14206	6.33872	5.74164	6.52983	4.37928	5.03341	5.49428	4.8887	5.90246	4.91346	5.34592	4.69143	6.704	7.27947	0.118809	0.590181	0.09525	0.262821	no
Wdr5	chr2:27515146-27536535	WTLV	TGLV	OK	3.67087	3.54333	3.70983	3.82973	3.21372	2.51741	3.20792	3.40547	3.66632	3.55588	3.44553	4.55954	3.75701	3.58181	4.6786	3.35104	5.35869	4.47457	-0.260133	-1.0035	0.0049	0.0288082	yes
Rxra	chr2:27676444-27763319	WTLV	TGLV	OK	7.25448	6.43592	6.79941	6.76543	5.93706	7.13881	7.20592	7.30655	5.89334	6.71247	5.78584	6.27643	5.93753	6.54428	6.57046	6.1549	8.13932	8.25463	0.0202965	0.102556	0.7682	0.891323	no
Col5a1	chr2:27886394-28039510	WTLV	TGLV	OK	4.66792	3.81516	3.4531	5.80526	6.1828	4.54289	4.42667	5.67327	3.20938	2.53116	3.27637	3.02864	3.45654	3.40064	2.92446	2.62464	4.50919	6.32178	0.487464	2.52284	5e-05	0.000553274	yes
Olfm1	chr2:28193092-28230736	WTLV	TGLV	OK	2.02875	2.24837	1.55563	2.24387	1.99526	1.85564	1.44085	2.5864	1.34589	0.723039	1.21557	1.56734	0.969034	1.67514	1.50573	1.04304	1.78917	2.72248	0.60563	0.962829	0.00565	0.0323964	yes
Ppp1r26	chr2:28446154-28455508	WTLV	TGLV	OK	0.68075	0.803154	0.667634	0.510726	0.626344	0.710195	0.73333	0.868029	0.662384	0.543384	0.493399	0.739325	0.689374	0.589236	0.781183	0.588837	0.818099	0.836142	0.0314733	0.0798184	0.8125	0.914555	no
Mrps2	chr2:28462000-28471177	WTLV	TGLV	OK	9.09548	6.80747	7.98049	8.17567	7.41741	8.10187	7.7297	9.56127	6.02852	7.32301	7.77398	7.517	7.66749	7.05054	6.13122	8.70506	9.60105	9.79853	0.0293732	0.124187	0.7274	0.87098	no
Ralgds	chr2:28513088-28553082	WTLV	TGLV	OK	1.77919	1.64734	1.52521	1.7419	2.19821	1.80969	1.9612	1.85495	1.25648	1.75183	1.93112	1.90292	2.28428	1.23135	2.19411	1.96465	2.65425	2.53276	-0.0675934	-0.223142	0.51365	0.736391	no
Gtf3c5	chr2:28566244-28583279	WTLV	TGLV	OK	1.9569	1.39465	2.08405	2.43524	2.80634	2.16176	1.88972	1.96304	1.93645	2.24035	2.22292	2.35133	1.68266	2.5962	1.86009	1.56433	2.98601	2.83919	-0.0727377	-0.223754	0.5155	0.73715	no
Tsc1	chr2:28641188-28691172	WTLV	TGLV	OK	4.12626	3.78182	3.4158	4.16934	3.88706	3.87345	4.02226	3.81619	4.27398	3.39689	3.42472	3.74172	3.96743	3.48073	3.95386	3.79729	5.13575	4.84725	-0.0834062	-0.420623	0.23365	0.469005	no
Gtf3c4	chr2:28822298-28840360	WTLV	TGLV	OK	1.65774	1.37968	1.59098	1.79341	1.73259	1.83204	1.79108	1.73019	1.65498	1.64208	1.64423	1.86774	2.06448	1.46614	1.9122	1.84187	2.34402	2.06432	-0.183317	-0.733993	0.03915	0.141105	no
Ddx31	chr2:28840405-28905575	WTLV	TGLV	OK	1.02495	0.668517	0.832113	1.04174	1.98906	0.876666	1.24978	1.20112	0.479122	1.21703	0.571538	0.824939	0.983969	1.03601	0.889353	0.478238	1.29968	1.6087	0.307738	0.528631	0.12265	0.312342	no
Gm13394	chr2:28927748-29055274	WTLV	TGLV	OK	101.801	66.3984	66.4143	77.0657	111.314	102.749	107.49	104.258	91.2166	92.0498	91.3414	65.5194	66.9622	62.4692	90.4905	64.0734	18.8759	22.0053	0.221303	0.43264	0.2344	0.469713	no
Ttf1	chr2:29060198-29087656	WTLV	TGLV	OK	2.03125	1.87566	1.71672	2.42859	2.45491	2.54412	2.89672	1.99861	1.69799	1.63598	1.72016	1.77298	2.09503	2.54646	1.99013	1.69339	2.80285	2.97109	0.0840976	0.257452	0.46235	0.697397	no
Setx	chr2:29122586-29182471	WTLV	TGLV	OK	5.77921	5.31078	5.37826	5.94831	5.99935	5.3623	5.22294	5.05924	5.57497	4.79953	5.06614	5.59905	5.48964	5.68668	5.1526	5.52591	7.08249	6.74452	-0.0705418	-0.39738	0.26475	0.50406	no
Ntng2	chr2:29194725-29252993	WTLV	TGLV	OK	1.23983	0.469978	0.361523	1.17771	0.740624	0.777769	0.643138	0.547633	0.432107	0.698686	1.23258	0.766943	0.645875	0.849675	1.92234	0.877838	1.34884	0.968184	-0.478371	-0.60478	0.07775	0.228101	no
6530402F18Rik	chr2:29194725-29252993	WTLV	TGLV	OK	0.535323	0.606515	0.741426	0.966054	0.776658	0.784694	0.670483	0.972897	0.539362	0.725465	0.573509	0.695869	0.566021	0.466703	0.741735	0.599982	0.795204	0.902556	0.182691	0.354349	0.30605	0.550946	no
Med27	chr2:29346809-29524790	WTLV	TGLV	OK	3.05852	1.57331	3.07414	1.38559	3.25257	2.24265	2.68104	3.48969	1.96968	2.89362	2.79624	1.53683	2.35138	2.31757	1.21902	2.66622	3.20803	3.60186	0.167058	0.359656	0.29285	0.53774	no
Rapgef1	chr2:29619719-29740364	WTLV	TGLV	OK	22.5142	20.3853	20.1572	27.3142	22.6715	22.9193	23.8276	25.0564	16.5627	16.1646	18.3821	16.0978	16.8041	16.3415	16.0629	16.7014	21.9467	28.0657	0.354808	2.2052	5e-05	0.000553274	yes
Trub2	chr2:29761222-29787708	WTLV	TGLV	OK	1.4104	3.08677	2.60838	2.99307	3.12484	3.02165	2.11576	2.51228	1.63142	2.09196	2.0945	2.00837	2.66858	2.18476	1.95998	2.14385	2.76947	3.37851	0.286779	0.724606	0.04005	0.143344	no
Coq4	chr2:29788186-29797743	WTLV	TGLV	OK	3.12694	2.76334	2.33227	2.8597	2.19363	3.35032	3.28365	3.02856	2.01178	2.34856	2.48608	2.74076	1.74642	1.85906	3.26621	2.7413	3.43824	3.65129	0.086736	0.207087	0.5572	0.765317	no
Slc27a4	chr2:29802679-29817522	WTLV	TGLV	OK	2.20839	1.44662	1.28476	2.01582	2.10161	2.39023	1.8159	1.87562	1.21531	1.68645	1.38283	1.53387	1.92342	1.73968	1.56104	1.76459	2.21722	2.54817	0.20071	0.67874	0.0568	0.182876	no
Urm1	chr2:29827388-29844996	WTLV	TGLV	OK	3.96134	2.30686	3.7791	3.71649	3.39765	3.17831	2.82309	3.47373	2.49321	2.51627	2.88779	2.14849	2.12768	2.428	2.22338	2.26253	3.13904	4.05232	0.368423	1.12754	0.0016	0.0116399	yes
Cercam	chr2:29845099-29882845	WTLV	TGLV	OK	0.479684	0.500121	0.519041	0.652385	0.904631	0.567788	0.446005	0.595188	0.481442	0.424862	0.336435	0.940331	0.320062	0.379812	0.398205	0.411174	0.70808	0.829514	0.228353	0.378124	0.22865	0.463107	no
Odf2	chr2:29889013-29931746	WTLV	TGLV	OK	6.11442	5.58196	4.71824	6.16142	5.57049	5.93146	6.43998	5.94643	5.48199	5.8064	5.50285	4.59319	6.17393	6.35493	5.50877	5.47765	7.9429	7.6372	-0.0566222	-0.2241	0.5065	0.731549	no
Gle1	chr2:29935408-29959432	WTLV	TGLV	OK	6.99558	5.35095	5.66595	5.74298	6.43311	8.28742	6.16012	6.45987	5.80372	5.63004	5.80975	5.40505	5.75963	5.25497	5.4342	5.1223	7.73367	8.38686	0.116977	0.532222	0.12665	0.318686	no
Sptan1	chr2:29965559-30031451	WTLV	TGLV	OK	34.8816	33.014	30.4127	39.891	35.7111	32.1865	34.659	32.2826	30.7833	26.2836	30.9006	27.0129	28.5786	30.062	30.5836	29.785	39.0632	41.7981	0.0976278	0.642531	0.06705	0.205955	no
Wdr34	chr2:30031550-30048879	WTLV	TGLV	OK	1.50219	1.50804	0.761729	1.29528	1.02726	1.34727	1.74396	1.19974	0.583833	0.695574	1.19254	1.21256	0.571817	1.52394	0.662488	0.885261	1.42322	1.83312	0.365144	0.749569	0.03505	0.130134	no
Set	chr2:30061995-30072577	WTLV	TGLV	OK	13.7046	10.3535	11.4842	10.8083	13.2826	12.4861	12.6024	12.7532	11.2293	11.012	11.1828	10.7334	11.9998	11.1087	11.6667	11.4593	26.7967	26.2275	-0.0309742	-0.175747	0.6167	0.802877	no
Pkn3	chr2:30077540-30093635	WTLV	TGLV	OK	0.587269	0.523741	0.582377	1.15711	0.795079	0.731796	0.659128	0.598869	0.67399	0.552094	0.754993	1.07743	0.707551	0.890361	0.829282	0.748312	1.23172	1.13088	-0.123228	-0.250309	0.45875	0.69411	no
Zdhhc12	chr2:30077540-30093635	WTLV	TGLV	OK	1.16619	1.68262	0.482651	1.46515	0.642867	1.24646	1.70445	0.626334	0.861008	1.19929	0.287842	0.709935	0.751175	0.789482	0.819766	1.00931	1.13584	1.42632	0.328542	0.325891	0.34195	0.586136	no
Zer1	chr2:30097282-30125258	WTLV	TGLV	OK	3.19147	3.35829	2.98688	3.55132	3.09408	3.02548	3.17831	3.17653	2.88815	3.28384	3.19687	3.10714	3.4255	3.30754	2.929	3.0472	4.3108	4.08096	-0.0790472	-0.324723	0.35695	0.600364	no
Tbc1d13	chr2:30133749-30152013	WTLV	TGLV	OK	1.94129	2.31013	2.21421	2.07676	2.27861	2.21509	2.07197	1.97052	1.63315	1.88897	1.58534	2.18927	1.59669	2.38568	1.6776	1.58039	2.54234	2.88639	0.183105	0.60778	0.0799	0.232563	no
Endog	chr2:30171406-30178495	WTLV	TGLV	OK	16.9087	15.7468	13.7757	15.4094	15.8188	18.1949	16.6154	11.7123	12.3619	15.6696	14.0745	13.4025	18.1861	15.5927	16.7922	13.2031	9.88433	10.3432	0.0654691	0.168848	0.6327	0.813501	no
D2Wsu81e	chr2:30171406-30178495	WTLV	TGLV	OK	1.6188	1.42636	1.64841	1.48615	1.22037	0.895259	2.57287	1.66446	1.45017	1.42351	1.56505	1.58599	1.46172	1.71525	1.27869	2.14828	6.65573	6.12163	-0.120681	-0.349767	0.3203	0.565581	no
Kyat1	chr2:30185123-30209507	WTLV	TGLV	OK	5.58248	4.51571	3.91016	4.80651	5.94352	4.20382	5.35339	4.91693	5.76784	4.62033	3.85625	4.21371	5.31916	4.5776	4.63685	6.49047	6.90491	6.18896	-0.157925	-0.558218	0.1114	0.29342	no
1700084E18Rik	chr2:30237196-30237631	WTLV	TGLV	OK	1.39978	1.03987	0	1.12702	1.04941	0	0.53506	1.70403	0	0.899313	0	0.298615	0.268839	1.02521	1.6123	0.832408	0.787297	1.00835	0.357015	0.25622	0.5145	0.736806	no
Lrrc8a	chr2:30237768-30263790	WTLV	TGLV	OK	12.9122	10.6165	10.7665	10.8278	12.0098	11.6891	14.7848	12.9064	11.103	11.4534	10.7832	10.291	11.9276	11.3795	9.38667	10.5822	14.3244	14.5913	0.0266398	0.147239	0.6794	0.842387	no
Phyhd1	chr2:30266202-30282149	WTLV	TGLV	OK	10.8414	7.59767	8.42497	9.97785	8.35121	7.614	11.2616	7.02968	10.0841	10.5899	10.4545	11.2126	11.2889	8.27368	11.1692	10.1506	13.8172	11.1152	-0.313928	-1.19726	0.00065	0.0054185	yes
Dolk	chr2:30284228-30286354	WTLV	TGLV	OK	4.43662	3.42796	3.17708	3.64708	4.25285	3.9837	4.82225	4.5695	3.18104	3.48139	3.55282	3.82921	3.80512	2.88354	3.15325	3.32308	4.37149	4.78056	0.129054	0.431803	0.225	0.4592	no
Nup188	chr2:30286421-30344263	WTLV	TGLV	OK	2.13759	1.8195	1.94235	1.81641	1.88665	1.33824	1.49725	1.95326	1.62673	1.47221	1.78271	1.35906	1.60579	2.1129	1.53859	1.43519	2.6415	2.57389	-0.0374051	-0.147398	0.6755	0.839955	no
Sh3glb2	chr2:30344776-30359316	WTLV	TGLV	OK	12.1307	9.42495	9.32545	11.7015	11.7051	10.5968	8.81608	12.0133	10.5866	9.12176	10.2305	9.70953	9.38773	11.3534	10.3542	8.76198	13.4338	13.4973	0.00680472	0.0302071	0.93265	0.971776	no
Fam73b	chr2:30364197-30385520	WTLV	TGLV	OK	8.52082	5.93841	8.23087	6.34284	6.70747	6.76739	6.466	7.27794	6.57889	5.71642	6.89911	6.59775	7.89362	8.44234	6.98967	6.63545	9.414	8.81945	-0.094119	-0.432029	0.22015	0.453023	no
Dolpp1	chr2:30392253-30415748	WTLV	TGLV	OK	1.78085	1.25694	1.80395	0.906334	1.25165	1.14811	1.36127	1.28487	1.025	1.70799	1.37817	1.24098	1.29728	0.78588	0.864572	0.941919	1.59293	1.75016	0.135797	0.0990152	0.78895	0.902183	no
Crat	chr2:30392253-30415748	WTLV	TGLV	OK	68.3484	60.7353	57.1127	52.7318	57.6045	59.5211	65.7569	62.4524	70.6449	73.9516	67.5137	74.0391	76.9392	75.138	69.2759	73.248	93.5878	72.3416	-0.371495	-2.35502	5e-05	0.000553274	yes
Ptpa	chr2:30416049-30447807	WTLV	TGLV	OK	7.63573	6.54784	7.20443	6.58925	7.18818	5.98488	6.68549	7.04162	7.39085	5.59254	6.55082	6.96482	8.21991	6.80819	6.45653	6.55325	8.93626	8.40108	-0.0890957	-0.386353	0.27245	0.514497	no
Ier5l	chr2:30472630-30474199	WTLV	TGLV	OK	2.62184	2.8773	2.68313	1.96702	2.85902	2.5073	2.50547	2.56304	1.92635	1.73549	2.25034	2.49151	1.92262	2.00753	1.41844	1.70087	2.50466	3.05924	0.288559	0.702314	0.0467	0.159657	no
Ntmt1	chr2:30807778-30823026	WTLV	TGLV	OK	5.0182	3.21634	4.49943	3.90011	5.19442	4.36416	4.48436	5.44786	3.16075	4.45839	3.52218	4.76488	4.29461	3.99123	3.99759	5.20982	5.61108	5.71156	0.0256054	0.0738153	0.83255	0.925673	no
Asb6	chr2:30823096-30828300	WTLV	TGLV	OK	1.39728	1.45574	1.31877	0.788873	1.4691	1.07551	0.911883	1.41749	0.707199	0.802825	0.965282	1.01784	1.24361	1.52882	0.883218	1.08087	1.43869	1.59196	0.146042	0.317856	0.3634	0.607327	no
Tor1b	chr2:30952938-30967918	WTLV	TGLV	OK	4.50994	4.52517	4.62745	4.42032	4.80619	4.70344	4.53086	4.27997	4.0992	3.79989	3.783	3.33136	3.84568	4.35745	3.35645	3.44267	4.89744	5.56426	0.184162	0.627228	0.07525	0.223371	no
Tor1a	chr2:30952938-30967918	WTLV	TGLV	OK	3.54502	2.42052	1.95622	2.25611	3.32211	2.64233	2.49094	3.06743	2.61913	1.67468	1.69537	2.66915	1.80225	1.90911	2.30183	2.73849	3.04566	3.45751	0.182979	0.308173	0.3784	0.621421	no
BC005624	chr2:30970692-30981941	WTLV	TGLV	OK	8.42972	6.60595	8.22535	7.37986	7.40174	6.89142	8.10246	7.82497	7.91756	5.59536	7.75854	6.69055	7.51863	6.44644	7.97091	6.81933	15.1368	13.9074	-0.122212	-0.478131	0.17765	0.39642	no
Usp20	chr2:30982278-31022655	WTLV	TGLV	OK	3.99431	3.41383	3.31942	3.0478	3.79728	3.88341	3.66943	3.13278	2.86377	2.82245	2.9138	2.38231	3.14251	3.36301	3.13103	2.93903	4.14155	4.58633	0.147172	0.594024	0.0949	0.262038	no
Fnbp1	chr2:31026205-31142028	WTLV	TGLV	OK	19.3339	15.0429	15.5602	14.1013	16.5583	16.032	17.3861	16.065	15.1603	15.1489	13.9051	14.6182	16.4655	14.0708	15.7612	15.3273	19.2125	19.2272	0.00110558	0.00542657	0.9878	0.994865	no
D330023K18Rik	chr2:31151048-31152291	WTLV	TGLV	OK	2.73463	0.976683	3.20667	3.17561	2.56267	1.207	1.0051	4.05457	1.37846	3.37867	1.76537	2.69252	2.62603	2.31099	2.22102	1.25092	3.02928	3.1791	0.0696449	0.092828	0.7796	0.89876	no
Gpr107	chr2:31152315-31216567	WTLV	TGLV	OK	3.72673	3.69172	3.48785	3.27556	3.83912	3.59755	4.43118	3.57776	3.08018	2.91811	3.10188	2.7434	3.61232	3.01138	3.27484	2.70518	4.34864	4.90474	0.173613	0.724469	0.03895	0.140555	no
Ncs1	chr2:31245742-31295989	WTLV	TGLV	OK	0.898762	1.14401	0.836963	1.42733	1.38287	1.19437	1.24183	1.14652	0.735931	1.22836	0.881041	0.743193	1.23344	0.879514	0.964715	0.757948	1.31967	1.44	0.125885	0.341806	0.33145	0.576577	no
Hmcn2	chr2:31307612-31460738	WTLV	TGLV	OK	1.26155	1.48591	1.20777	1.52812	1.26485	1.40327	1.04827	1.39315	1.09339	0.807793	0.965608	0.879205	1.15699	0.789088	1.12527	1.16267	1.57479	1.85849	0.238967	1.11928	0.00215	0.0148553	yes
Ass1	chr2:31470269-31520670	WTLV	TGLV	OK	0.228006	0.40228	0.0534728	0.183576	0.341869	0.305263	0.261463	0.254434	0.398433	0.195315	0.215268	0.145922	0.153266	0.166993	0.109426	0.225981	0.932277	1.19399	0.356964	0.584203	0.0992	0.270876	no
Fubp3	chr2:31572650-31617526	WTLV	TGLV	OK	1.87754	1.88778	1.56869	1.89472	2.57638	1.82114	2.06433	1.72661	1.71701	1.66991	1.56899	1.42071	1.13082	1.57852	2.32916	2.25765	2.60149	2.65415	0.0289151	0.0931676	0.7787	0.89822	no
Exosc2	chr2:31670736-31681349	WTLV	TGLV	OK	1.57122	1.27819	1.17022	1.44388	2.23339	1.9782	2.15479	1.31712	2.0738	1.31377	1.56736	1.45461	2.07701	1.47959	1.68739	1.46654	3.16926	3.0777	-0.0422909	-0.110059	0.75815	0.886532	no
Abl1	chr2:31681450-31810580	WTLV	TGLV	OK	3.92579	3.77909	3.44741	3.76996	3.70729	4.027	3.90432	3.42674	3.72623	3.0708	3.11307	2.77941	3.51023	3.48111	3.43137	3.37769	4.36791	4.62419	0.0822581	0.361302	0.29965	0.543742	no
Nup214	chr2:31974417-32087436	WTLV	TGLV	OK	2.88024	2.6672	2.17449	2.76453	2.55711	2.97832	2.43933	2.47118	2.347	2.72112	2.05323	2.12418	2.32497	2.55809	2.16445	2.20583	3.22671	3.26698	0.0178926	0.0560935	0.87055	0.943275	no
Fam78a	chr2:31974417-32087436	WTLV	TGLV	OK	5.25139	3.55255	4.42893	3.11585	4.73409	4.39496	3.20829	3.93399	3.36154	3.08609	3.81272	4.93499	4.17596	4.31718	4.0459	3.12709	5.27547	5.18637	-0.0245759	-0.0673904	0.84575	0.931419	no
Plpp7	chr2:32095515-32110820	WTLV	TGLV	OK	7.15469	3.97054	5.56013	5.74138	5.83543	5.20744	6.03307	6.36801	4.70252	5.68858	5.38245	4.71621	5.22212	5.33841	4.80375	4.65863	6.55962	6.8203	0.0562234	0.202301	0.56725	0.771312	no
Prrc2b	chr2:32151147-32234537	WTLV	TGLV	OK	13.5001	14.438	13.6764	12.4547	15.1788	15.4389	15.3333	14.1442	14.4643	14.3126	13.2739	15.2596	15.1398	14.9557	15.5799	13.8766	19.2763	17.3593	-0.151118	-0.942223	0.00775	0.0413322	yes
Pomt1	chr2:32236594-32260246	WTLV	TGLV	OK	1.96828	2.25192	2.73407	1.6686	1.51103	2.28175	2.1255	2.34719	2.14927	1.76118	2.49876	1.82248	2.29162	1.91824	1.7947	2.2475	2.98812	2.84987	-0.0683427	-0.177665	0.61025	0.798258	no
Uck1	chr2:32236594-32260246	WTLV	TGLV	OK	2.45247	2.33526	2.24928	1.87424	1.74549	2.26244	2.02918	2.21103	1.68865	2.11424	2.40364	1.6492	2.12277	1.60241	2.00261	1.32932	2.49406	2.71487	0.122384	0.254455	0.4638	0.698001	no
Swi5	chr2:32278804-32288128	WTLV	TGLV	OK	44.8866	42.7631	50.8009	35.7195	42.5578	38.6631	46.4136	46.0139	46.4796	49.4494	49.3371	51.6072	52.9308	57.425	49.4143	50.186	83.1036	66.3509	-0.324795	-1.60516	5e-05	0.000553274	yes
Golga2	chr2:32288149-32307921	WTLV	TGLV	OK	21.5911	20.3591	17.8402	20.1276	22.9015	22.3632	24.9698	21.3742	18.1631	18.655	19.767	20.5644	19.8583	19.9466	19.9119	18.7444	25.6868	26.0215	0.0186798	0.111383	0.75185	0.882743	no
Dnm1	chr2:32308470-32353339	WTLV	TGLV	OK	1.22834	1.37565	0.910747	1.03936	1.30931	1.32996	1.42567	1.27598	0.947356	0.636535	0.893938	1.00908	0.884706	0.624574	1.16295	0.946684	1.40263	1.81524	0.372024	0.947955	0.0021	0.0145951	yes
Ciz1	chr2:32363004-32378313	WTLV	TGLV	OK	7.1972	6.92864	7.6223	7.71512	9.20017	7.59804	7.66505	8.27425	6.9735	6.90187	6.07528	7.59199	7.32356	6.37033	7.63482	6.35404	9.30661	9.65955	0.0537004	0.243374	0.48495	0.713758	no
1110008P14Rik	chr2:32379100-32381915	WTLV	TGLV	OK	14.3278	11.8413	14.2809	16.2944	18.6633	11.9206	17.6625	16.7153	10.7974	11.1996	12.0243	11.4621	14.9971	11.5431	10.5895	10.2244	14.9645	18.1485	0.278307	0.875728	0.0143	0.0669389	no
Lcn2	chr2:32384636-32387739	WTLV	TGLV	OK	0.700853	0.743786	0.704429	1.91454	0.750608	0.382992	0.478389	1.11727	0.656099	0.750459	0.420127	0.21359	0.769167	0.183325	1.24933	0.694628	0.912537	1.39402	0.611292	0.698403	0.04255	0.149752	no
Ptges2	chr2:32395889-32402740	WTLV	TGLV	OK	6.66511	6.05091	5.19587	7.30751	7.22302	5.48373	6.86743	6.76151	6.10007	6.02048	6.40604	6.43416	6.90102	5.0111	5.0394	6.49519	8.0776	8.06044	-0.00306947	-0.0120877	0.97395	0.988202	no
Slc25a25	chr2:32414486-32455476	WTLV	TGLV	OK	1.1681	1.10365	1.2877	0.9435	1.04141	1.14435	2.03126	1.10031	0.626733	0.641343	0.575831	0.381137	0.651046	0.723812	0.59414	0.452535	0.878412	1.53692	0.807074	1.45486	5e-05	0.000553274	yes
Naif1	chr2:32414486-32455476	WTLV	TGLV	OK	0.753388	0.624011	0.614927	0.894459	1.29478	0.854296	0.81735	1.08057	0.54566	0.447912	0.744429	0.748572	0.98983	0.52203	0.831244	0.65209	0.918243	1.0822	0.237014	0.387195	0.27665	0.519031	no
Fam102a	chr2:32535358-32569750	WTLV	TGLV	OK	0.941229	1.37132	1.12273	1.50257	1.7945	1.48984	0.992498	1.64628	0.921637	1.45964	1.66834	1.29823	1.13761	1.14398	1.4019	1.06154	1.77594	1.79566	0.0159348	0.0495542	0.88905	0.95235	no
Dpm2	chr2:32570857-32573571	WTLV	TGLV	OK	2.37374	3.1227	2.2036	3.18532	3.70746	3.02673	3.49709	2.90976	3.13263	4.02444	1.55634	2.42646	2.65939	3.07867	2.65819	2.35266	3.73452	3.78864	0.0207573	0.0421954	0.90335	0.958639	no
St6galnac4	chr2:32587077-32599696	WTLV	TGLV	OK	2.51936	2.08148	1.91013	3.10748	2.30786	1.84781	2.73326	2.54162	1.90335	1.99908	1.86909	1.74598	2.11019	1.90936	1.80015	2.03368	2.54685	2.91592	0.195235	0.672607	0.059	0.187661	no
St6galnac6	chr2:32599708-32620809	WTLV	TGLV	OK	10.3406	7.90529	7.61711	7.51697	8.81902	7.5727	8.1787	7.30162	5.98969	6.05698	6.26627	6.8557	7.51885	6.67275	7.31598	6.93686	8.89895	10.0538	0.176032	0.771005	0.0257	0.103756	no
Ak1	chr2:32621757-32635058	WTLV	TGLV	OK	137.963	114.785	106.623	114.552	119.582	120.509	125.437	114.439	116.96	117.165	115.894	123.816	128.356	122.574	115.303	125.075	154.617	141.36	-0.12932	-0.850206	0.01575	0.0717945	no
Eng	chr2:32646594-32704196	WTLV	TGLV	OK	18.648	18.0187	19.1814	21.5005	21.2541	19.9056	17.4347	19.329	15.9395	17.2939	17.2182	18.6812	16.7269	16.6246	17.2669	20.4459	23.1996	23.5258	0.0201462	0.113375	0.7534	0.883569	no
Fpgs	chr2:32646594-32704196	WTLV	TGLV	OK	1.39108	0.635098	1.07502	1.27275	1.34011	1.03403	0.997011	1.47536	0.665585	0.953911	1.06122	0.775629	1.28791	0.781458	0.940743	1.09672	1.36292	1.64984	0.275627	0.28435	0.40045	0.642469	no
Cdk9	chr2:32705781-32712784	WTLV	TGLV	OK	2.97496	2.61879	2.7011	2.88831	3.07436	3.92072	3.53149	3.13912	2.51373	2.96781	2.55172	3.74072	1.94712	2.55471	2.62416	2.28013	3.48622	3.98735	0.193764	0.574851	0.10115	0.274302	no
Sh2d3c	chr2:32721054-32755007	WTLV	TGLV	OK	2.76222	3.53416	2.21886	4.7533	3.3412	2.76875	4.66342	4.05534	3.88361	4.38776	3.2948	3.22757	3.53416	3.23718	3.91262	3.26145	5.01722	4.52868	-0.147797	-0.536236	0.12	0.30865	no
Tor2a	chr2:32757025-32775661	WTLV	TGLV	OK	2.66303	1.30917	1.83587	2.94289	2.20198	1.49003	1.35202	2.43634	1.60057	1.50878	1.51916	1.89368	1.45309	1.76875	2.05428	1.8749	2.37286	2.54298	0.0998952	0.213435	0.5409	0.752331	no
Ptrh1	chr2:32775738-32784405	WTLV	TGLV	OK	0.429984	1.23135	0.1522	0.751527	1.41051	1.11462	0.614182	1.46392	0.165269	0.0981577	0.384666	0.599445	0.809726	1.41962	0.269712	1.06082	0.66223	0.956118	0.529858	0.356768	0.2765	0.518832	no
Stxbp1	chr2:32787606-32850448	WTLV	TGLV	OK	1.88087	2.14009	1.14477	2.05459	2.04687	2.00545	1.78533	1.89113	1.39532	1.938	1.50775	1.84528	1.55058	1.60877	1.29441	1.61869	2.34013	2.47652	0.0817254	0.271195	0.44085	0.679366	no
Fam129b	chr2:32876133-32961654	WTLV	TGLV	OK	3.00492	2.2011	3.5674	3.21207	3.3057	3.01644	3.12125	3.71108	2.24228	2.698	2.70196	2.78714	2.31206	2.44346	3.0097	2.38629	3.73501	4.1432	0.149633	0.468534	0.1849	0.406993	no
Lrsam1	chr2:32876133-32961654	WTLV	TGLV	OK	2.80046	1.91541	2.83221	2.18064	2.63767	2.42421	2.61504	2.28265	2.66231	1.80879	2.55479	2.70322	2.46632	3.13492	2.63993	1.87214	3.80901	3.57563	-0.0912208	-0.227149	0.5091	0.733513	no
Rpl12	chr2:32961711-32964045	WTLV	TGLV	OK	17.2172	12.8775	14.2948	12.1643	17.8481	14.6854	14.6652	16.2465	13.155	14.5621	14.7238	16.7035	16.984	17.2831	17.1148	16.8454	110.427	99.9984	-0.143115	-0.751725	0.0319	0.122118	no
Snora65	chr2:32961711-32964045	WTLV	TGLV	OK	43.4358	0	101.867	123.859	27.1363	89.9997	0	14.688	0	62.0136	0	46.3309	83.4219	59.6487	69.4868	64.575	65.6372	62.3079	-0.0750989	-0.181977	0.94795	0.977145	no
Slc2a8	chr2:32972980-32982171	WTLV	TGLV	OK	1.75826	1.69966	1.7467	2.59549	1.74928	2.08708	2.41232	2.09298	1.5788	2.03346	1.99233	1.87602	1.99041	1.57742	2.12806	2.24931	2.63187	2.56171	-0.0389844	-0.105165	0.7638	0.88927	no
Ralgps1	chr2:33133418-33371512	WTLV	TGLV	OK	0.498342	0.632769	0.443798	0.527519	0.574819	0.680559	0.78866	0.588319	0.423978	0.622441	0.669139	0.571111	0.604872	0.42648	0.845257	0.368632	0.882252	0.799423	-0.142231	-0.206278	0.5427	0.753594	no
Angptl2	chr2:33133418-33371512	WTLV	TGLV	OK	14.1735	15.1755	11.0189	14.3593	13.4851	13.454	15.4565	12.0646	9.00984	9.98539	9.33259	9.2095	9.46931	11.1519	9.98391	10.0093	12.6507	16.3563	0.370629	1.82114	5e-05	0.000553274	yes
Zbtb43	chr2:33450286-33468655	WTLV	TGLV	OK	2.46795	2.43231	2.21517	2.53861	3.03072	2.70918	3.2715	2.65987	2.28537	2.22563	2.69341	2.06385	2.73452	2.53304	2.36078	1.89191	3.03924	3.18685	0.0684173	0.273755	0.43095	0.670663	no
Mvb12b	chr2:33729952-33887946	WTLV	TGLV	OK	4.88068	4.26911	4.57686	4.037	4.11422	4.36173	5.25767	4.69699	4.06696	3.56579	4.07781	4.05267	4.02181	3.73396	3.65741	4.26097	5.18558	5.52093	0.0904065	0.363282	0.29935	0.5436	no
Pbx3	chr2:34171456-34372045	WTLV	TGLV	OK	2.53721	2.34419	1.83566	2.19537	1.86594	2.5769	2.15758	1.6446	1.68169	1.23657	1.83066	1.97089	1.53148	1.80908	1.38563	1.37349	2.27951	2.64569	0.214922	0.634472	0.0681	0.208208	no
Mapkap1	chr2:34406770-34624958	WTLV	TGLV	OK	11.4248	9.87107	11.3507	9.8992	11.3773	9.13047	9.48935	9.07276	8.24471	9.4088	9.02311	8.67838	10.0765	8.61551	8.23321	9.57687	12.5969	12.869	0.0308262	0.138167	0.69	0.848618	no
Gapvd1	chr2:34676178-34755265	WTLV	TGLV	OK	6.99599	6.94868	5.93973	5.96794	6.17281	6.14842	6.11477	6.47842	6.31505	5.60208	5.44405	6.02655	5.94917	6.14241	5.6309	5.37502	7.85658	7.97201	0.0210414	0.103693	0.7667	0.890455	no
Hspa5	chr2:34772089-34800164	WTLV	TGLV	OK	127.861	106.377	120.755	101.179	119.292	117.423	119.534	131.249	146.139	135.451	118.89	149.7	163.835	146.716	133.428	134.242	181.274	140.142	-0.371284	-2.43409	5e-05	0.000553274	yes
Rabepk	chr2:34772089-34800164	WTLV	TGLV	OK	2.24002	1.27426	1.69775	1.09564	1.27768	1.79868	2.24551	1.99962	1.64161	1.20736	3.09816	1.56183	1.74518	1.50286	1.47045	1.64671	2.42358	2.205	-0.13636	-0.0834684	0.8498	0.93284	no
Fbxw2	chr2:34804363-34826274	WTLV	TGLV	OK	5.35922	4.76866	4.70949	5.14846	7.08339	6.42444	6.2875	6.61122	5.70274	5.5623	4.80195	5.12031	4.81865	6.44569	7.27587	5.23666	7.46244	6.9148	-0.10996	-0.432315	0.21565	0.448081	no
Psmd5	chr2:34852086-34870962	WTLV	TGLV	OK	4.35589	2.71162	3.0631	3.56413	4.74517	3.53946	3.61356	4.92113	3.82733	2.6165	4.38975	3.32186	3.53677	3.63907	2.55106	3.35653	4.79348	4.86242	0.0205998	0.0676302	0.8492	0.93284	no
Cntrl	chr2:35109491-35178822	WTLV	TGLV	OK	2.89956	2.67514	1.8642	2.09706	2.34187	3.11666	2.16695	2.1655	1.5243	1.44796	1.91273	1.65495	1.97363	1.69776	2.33259	1.97029	2.64191	3.28068	0.312412	1.1301	0.00135	0.0101007	yes
Rab14	chr2:35180204-35201120	WTLV	TGLV	OK	23.0281	20.2385	18.9088	16.3883	20.1272	21.059	21.7248	22.3854	17.4756	17.0122	17.7945	18.1536	20.5271	18.5235	17.9001	19.2121	25.1051	25.9102	0.045539	0.26045	0.4627	0.697397	no
Gsn	chr2:35256358-35307902	WTLV	TGLV	OK	300.76	208.539	227.994	191.194	294.635	273.223	277.803	291.241	186.47	170.456	196.785	185.387	176.314	194.876	190.927	175.296	237.701	305.794	0.363409	2.39977	5e-05	0.000553274	yes
Stom	chr2:35313989-35337009	WTLV	TGLV	OK	15.8783	13.402	13.8548	14.0988	12.614	13.3491	13.2441	14.4642	14.5921	14.3864	14.6957	15.1286	16.2531	13.6923	15.4083	14.5761	19.2691	16.548	-0.219635	-1.16469	0.0012	0.00915794	yes
Ggta1	chr2:35400178-35464381	WTLV	TGLV	OK	3.53811	2.15892	3.03622	3.89766	3.2143	3.14132	3.17075	3.56149	2.20289	2.53369	2.98342	2.55962	2.52429	2.95194	2.76391	2.78964	3.7561	4.11674	0.132266	0.507207	0.1472	0.350771	no
Dab2ip	chr2:35549533-35730994	WTLV	TGLV	OK	8.04115	7.39724	7.49066	8.63632	7.28587	8.24682	8.43487	9.51594	7.58847	7.71678	7.04596	7.88168	8.22439	7.81165	7.36999	8.05734	10.5739	10.15	-0.0590251	-0.301203	0.39365	0.636828	no
Ndufa8	chr2:36036333-36049292	WTLV	TGLV	OK	141.903	130.08	126.4	120.091	128.202	138.257	136.068	123.02	135.758	135.699	133.326	140.614	157.832	130.468	130.846	127.528	175.675	155.302	-0.177836	-1.04777	0.00295	0.0190063	yes
Lhx6	chr2:36081949-36105998	WTLV	TGLV	OK	0.959131	0.774441	0.543211	1.06193	0.8206	0.604233	0.540427	0.58408	0.644742	0.443936	0.686675	0.512051	0.607651	0.45947	0.691147	0.559898	0.777439	0.904924	0.219066	0.431824	0.1857	0.408071	no
Rbm18	chr2:36116078-36190284	WTLV	TGLV	OK	4.74934	4.68016	5.45543	4.61303	4.89188	4.63198	5.48847	6.51477	5.4027	4.54964	5.9234	5.08249	6.14902	5.12503	5.41989	5.01297	6.79423	5.97888	-0.184436	-0.516746	0.14195	0.34315	no
Mrrf	chr2:36116078-36190284	WTLV	TGLV	OK	8.33862	7.62072	5.82248	7.04122	7.78222	7.29302	7.08334	9.55065	8.78727	7.68145	8.40847	7.07083	8.96447	7.81897	6.71049	8.21128	12.9161	11.5945	-0.155731	-0.589085	0.0966	0.265246	no
LOC108168747	chr2:36191008-36193743	WTLV	TGLV	OK	1.43636	1.43952	1.38761	1.45575	1.47643	1.37361	1.1882	1.69558	1.59727	1.63951	1.67119	1.3697	1.03387	1.6124	1.96105	1.73708	1.94488	1.642	-0.244229	-0.632874	0.07125	0.21484	no
Ptgs1	chr2:36216743-36252275	WTLV	TGLV	OK	0.812706	0.785526	0.835364	0.652495	1.39898	0.888496	0.726408	1.48819	0.673559	0.628896	0.649356	0.931816	0.747785	0.761015	0.891785	0.848165	1.15467	1.2408	0.10379	0.215047	0.52275	0.741422	no
Pdcl	chr2:37350073-37359820	WTLV	TGLV	OK	5.51979	4.12911	5.054	4.54296	4.39105	4.56311	5.15757	4.85228	3.72027	4.25555	4.23732	4.63165	5.03152	4.58176	3.4144	4.42482	5.64645	5.68337	0.00940332	0.0377669	0.9175	0.966181	no
Rc3h2	chr2:37370065-37423408	WTLV	TGLV	OK	4.95398	5.48721	5.40787	5.53334	5.61068	5.91675	4.99781	5.3915	4.61895	4.77836	5.40128	4.76689	4.54492	5.27853	5.00166	4.80117	6.5585	6.5791	0.00452494	0.0248559	0.94405	0.976058	no
Zbtb6	chr2:37425499-37430919	WTLV	TGLV	OK	1.1871	0.796814	0.633261	1.07592	1.0875	1.43438	1.24784	1.02304	0.97191	1.00315	1.00379	0.848963	1.01732	0.945934	1.18623	0.425043	1.20075	1.2664	0.0767941	0.214122	0.53925	0.750887	no
Zbtb26	chr2:37432167-37443121	WTLV	TGLV	OK	0.887598	0.561428	0.70896	0.582587	0.590687	0.799616	0.57776	0.822137	0.407431	0.564743	0.742201	0.37047	0.741174	0.353305	0.567977	0.522729	0.697727	0.828643	0.248089	0.605676	0.08285	0.238393	no
Rabgap1	chr2:37443280-37566454	WTLV	TGLV	OK	7.40231	6.76835	5.94891	6.07584	6.82067	7.45388	7.03546	7.19121	6.94662	7.10102	6.57184	7.55261	7.93375	6.43773	6.81596	6.92211	9.62768	8.65675	-0.153362	-0.787473	0.02465	0.100685	no
Strbp	chr2:37569867-37703967	WTLV	TGLV	OK	2.2293	1.54088	1.69037	1.53389	1.77672	1.82808	2.2312	1.97374	1.96404	1.14865	1.81084	1.60919	1.31989	2.13339	1.67322	1.16275	2.35668	2.41337	0.0342949	0.102001	0.76035	0.8877	no
Dennd1a	chr2:37776224-38287384	WTLV	TGLV	OK	3.51962	3.48587	2.2447	3.29022	3.35973	2.67018	3.09716	3.35901	2.7966	3.04289	2.55326	2.31052	3.05108	3.09165	3.17744	2.23631	3.96004	4.16269	0.0720002	0.289047	0.40735	0.648169	no
Nek6	chr2:38511696-38587490	WTLV	TGLV	OK	0.794776	0.532229	0.741341	0.884369	0.715873	1.02265	0.517179	0.580825	0.572385	0.696105	0.907388	0.30462	0.316332	0.145658	0.44281	0.377809	0.698547	0.999799	0.51728	0.88656	0.0091	0.0468628	yes
Psmb7	chr2:38588045-38643952	WTLV	TGLV	OK	55.2811	42.1262	47.2592	45.8512	44.4342	47.5586	55.5312	50.4211	48.4459	48.7206	49.0181	48.2727	49.4071	43.8496	48.5006	51.0508	71.8031	67.5778	-0.0874956	-0.456039	0.1964	0.423558	no
Olfml2a	chr2:38931979-38960585	WTLV	TGLV	OK	1.32858	0.986976	1.24634	0.921124	1.43871	1.72229	1.57996	1.3478	0.838375	1.35939	0.681381	0.944755	1.67274	1.02712	1.07687	1.43383	1.52716	1.71983	0.171415	0.407867	0.2455	0.482957	no
Rpl35	chr2:38998308-39005131	WTLV	TGLV	OK	88.6923	71.4818	76.7538	73.2175	77.4616	85.0839	73.51	80.6895	81.8266	76.2086	79.1545	74.5605	86.0015	80.1674	75.1816	76.2856	277.133	250.737	-0.1444	-0.814235	0.01925	0.0831963	no
Arpc5l	chr2:39007566-39015878	WTLV	TGLV	OK	22.6838	19.7392	20.5859	23.5833	22.6256	23.8575	28.185	22.0601	21.1201	22.3413	25.0667	24.202	24.5922	23.9024	22.2822	25.1825	30.4281	27.4786	-0.147098	-0.710066	0.0453	0.156317	no
Golga1	chr2:39016154-39065581	WTLV	TGLV	OK	4.74798	4.27979	4.47993	4.83545	4.26906	4.89697	4.12652	4.29542	3.44134	3.49992	3.6507	3.78781	3.21504	4.70614	3.92978	3.24331	5.08876	5.93827	0.222729	0.934198	0.00835	0.0438208	yes
Scai	chr2:39066213-39190730	WTLV	TGLV	OK	1.12439	1.31666	1.14678	1.27923	1.14513	1.16894	0.840507	0.942244	0.800703	0.680308	0.974532	1.25124	0.563054	1.38766	0.750481	0.727259	1.57579	1.73583	0.13955	0.23881	0.4948	0.722218	no
Ppp6c	chr2:39194368-39226338	WTLV	TGLV	OK	11.4735	10.6517	9.86273	11.2325	12.9309	10.0148	10.5862	11.9409	9.22156	10.21	11.0914	10.8315	9.85136	8.53354	9.32008	9.45793	13.4809	13.5611	0.00855446	0.0344809	0.9235	0.968189	no
Arhgap15	chr2:43738334-44395953	WTLV	TGLV	OK	0.444044	0.366705	0.226941	0.32462	0.132225	0.144216	0.0931955	0.611554	0.184677	0.252123	0.254833	0.198191	0.124222	0.270703	0.490486	0.207148	3.96503	3.80843	-0.0581376	-0.179202	0.59855	0.791021	no
Gtdc1	chr2:44564411-44927712	WTLV	TGLV	OK	1.67565	2.90463	2.23433	1.88315	1.67493	1.78914	1.97487	2.03985	1.67751	1.58474	2.3731	1.87872	1.87721	1.91758	1.796	1.27334	2.73278	2.86354	0.0674314	0.201595	0.56265	0.767978	no
Zeb2	chr2:44983511-45117442	WTLV	TGLV	OK	12.4819	11.4889	11.7609	12.0759	13.555	11.8065	10.9802	13.63	8.90778	9.13155	9.47878	9.98229	10.2998	10.6445	9.74174	9.78863	12.6884	14.5914	0.201609	1.12131	0.0013	0.00978225	yes
Zeb2os	chr2:44983511-45117442	WTLV	TGLV	OK	0.546722	0.288661	0.698476	0.564736	1.01679	0.399775	1.13649	0.698151	0.659412	0.853835	0.602401	0.517419	0.879893	0.820805	0.373422	0.82229	1.47594	1.56392	0.0835287	0.0607378	0.8604	0.937689	no
Acvr2a	chr2:48814108-49319690	WTLV	TGLV	OK	2.3758	2.43922	2.5141	2.46153	2.68978	2.43596	2.47281	2.38746	2.11041	2.55693	2.20908	2.47939	2.53754	2.55487	2.56856	2.62184	3.33492	3.09088	-0.109637	-0.281236	0.4189	0.658669	no
Orc4	chr2:48814108-49319690	WTLV	TGLV	OK	9.24936	7.79297	9.51458	7.61426	10.482	8.23087	11.5116	9.1721	7.78784	7.69421	9.9721	11.1674	9.82183	9.38798	6.02671	8.08477	11.5737	11.3537	-0.0276832	-0.0652542	0.852	0.933868	no
Mbd5	chr2:48814108-49319690	WTLV	TGLV	OK	2.48919	2.88924	2.58584	2.45967	3.23459	2.74533	2.64438	3.10096	2.47247	2.27546	3.04738	2.5614	3.14673	2.73402	2.76735	2.97401	3.72741	3.58685	-0.055454	-0.175959	0.6136	0.800516	no
Epc2	chr2:49451485-49551942	WTLV	TGLV	OK	3.93505	4.07353	4.24664	3.84988	4.42045	5.11248	4.28474	5.53467	4.63758	4.27875	4.25959	4.09699	4.83066	4.37358	5.55275	4.27052	6.188	5.52481	-0.163548	-0.748815	0.034	0.127759	no
Mmadhc	chr2:50279880-50433967	WTLV	TGLV	OK	27.065	26.4277	24.8836	20.5646	22.9382	24.1524	27.8549	20.1196	22.0846	21.7122	24.7941	24.9465	23.513	25.0857	18.9933	22.7022	29.7402	29.0229	-0.0352231	-0.169479	0.62805	0.809987	no
Rnd3	chr2:51130438-51149111	WTLV	TGLV	OK	5.83321	3.96458	4.88997	4.99632	5.79207	4.79504	5.62174	5.0866	4.58158	4.94371	5.31204	6.06314	5.31553	5.22672	4.2648	4.50211	6.58862	6.27523	-0.0703068	-0.292087	0.40375	0.645051	no
Rbm43	chr2:51924447-51935342	WTLV	TGLV	OK	0.744194	1.20078	0.717493	1.5736	0.941355	1.17371	0.838331	0.818523	1.14993	0.775002	0.924745	0.93574	0.965169	0.88599	1.0778	0.953924	1.27752	1.27215	-0.00608581	-0.0113734	0.96935	0.9867	no
Nmi	chr2:51948497-51973529	WTLV	TGLV	OK	5.43955	4.93254	3.66474	4.531	3.63567	4.45729	4.21172	4.28262	3.36011	5.7132	3.90226	4.75603	3.89038	5.34621	4.55988	6.1608	6.73163	6.02258	-0.160575	-0.498007	0.15585	0.364554	no
Rif1	chr2:52072810-52126769	WTLV	TGLV	OK	4.78771	4.06194	3.75996	4.19629	4.61399	4.44129	4.32818	4.57931	3.7552	3.7807	3.78534	4.04022	3.71468	3.78393	3.95727	3.19786	5.14764	5.46301	0.0857838	0.443457	0.2105	0.441099	no
Neb	chr2:52136639-52338798	WTLV	TGLV	OK	0.546376	1.81262	0.533208	1.79027	0.512594	0.797956	0.380814	0.974837	0.532663	0.452397	0.766378	0.418642	0.514387	0.674729	0.682791	0.405562	0.906106	1.32846	0.552004	2.40647	5e-05	0.000553274	yes
Arl5a	chr2:52397948-52424874	WTLV	TGLV	OK	7.46459	5.72422	6.48119	5.88983	7.06857	6.64127	6.17658	7.53324	5.46839	6.26645	5.9073	5.90937	5.55625	6.60767	6.24144	5.41357	7.71084	7.99837	0.0528183	0.270091	0.44225	0.680106	no
Stam2	chr2:52692205-52742149	WTLV	TGLV	OK	4.12349	2.9248	2.93675	2.88342	3.40758	4.22406	3.01941	3.88676	2.90684	2.37428	2.77354	3.52859	2.89458	2.62102	3.05274	2.96537	4.21564	4.38369	0.0563923	0.2159	0.5389	0.750628	no
Fmnl2	chr2:52857716-53134202	WTLV	TGLV	OK	1.64076	1.42839	1.45735	1.88998	1.9474	2.13144	2.36411	1.89676	1.18614	1.46901	1.2712	1.30265	1.60017	1.4652	1.90707	1.20121	2.13576	2.57996	0.272598	0.889983	0.0104	0.052172	no
Prpf40a	chr2:53134705-53191279	WTLV	TGLV	OK	15.715	11.429	13.3724	12.1608	14.7565	13.3972	15.6313	14.5618	11.9682	12.191	12.7724	12.1392	13.4961	11.9563	12.7704	11.5566	17.0483	17.5483	0.0417065	0.20848	0.55575	0.764395	no
Arl6ip6	chr2:53192083-53219221	WTLV	TGLV	OK	1.13633	1.26109	1.26749	1.14363	1.4285	1.1397	1.05941	1.3777	0.998907	1.0387	1.65725	1.12338	1.6235	1.37018	1.01091	1.4284	1.69057	1.51127	-0.161748	-0.393878	0.26495	0.504279	no
Kcnj3	chr2:55411781-55598145	WTLV	TGLV	OK	19.0806	14.9156	12.8917	12.4688	14.001	16.2278	16.2336	13.4861	12.1946	12.6075	11.7987	12.4703	14.7003	13.7126	13.2501	11.0841	16.3689	17.7813	0.119402	0.686968	0.05475	0.178216	no
Gpd2	chr2:57237677-57370719	WTLV	TGLV	OK	1.56681	1.63037	1.4293	1.68229	1.63377	2.17354	1.31007	1.44019	1.49727	1.5452	1.61476	1.87276	1.56681	1.82248	1.62754	1.48985	2.26992	2.11426	-0.102486	-0.382789	0.27495	0.517707	no
Acvr1	chr2:58446437-58566828	WTLV	TGLV	OK	3.26491	2.24578	2.78994	3.00612	4.26922	2.85525	3.14416	4.10856	2.15572	1.70751	2.23893	2.24076	2.47855	2.8039	2.45369	2.01309	3.14116	4.03629	0.361731	1.23094	0.00045	0.00392555	yes
Pkp4	chr2:59160849-59355205	WTLV	TGLV	OK	13.1128	11.7451	11.9603	11.1415	12.1788	13.2007	12.2375	13.3944	15.8504	16.0785	14.7811	15.1573	14.3972	15.3205	16.0316	14.9063	20.5429	15.3822	-0.417376	-2.38401	5e-05	0.000553274	yes
Tanc1	chr2:59598964-59846213	WTLV	TGLV	OK	3.98716	4.5477	4.4983	5.11375	4.83679	4.92618	5.08155	4.63275	4.68174	4.49599	4.23908	4.80547	4.36651	4.54033	5.23508	4.63252	6.26153	5.82578	-0.104064	-0.54311	0.1215	0.31102	no
Wdsub1	chr2:59852363-59882620	WTLV	TGLV	OK	3.32893	2.72408	3.4138	2.90965	4.43251	2.45511	3.34552	2.57265	2.8738	2.58518	2.53705	2.99205	2.45837	2.49008	3.76297	3.16352	4.08299	4.16808	0.0297558	0.0855937	0.80015	0.907476	no
Baz2b	chr2:59899362-60209855	WTLV	TGLV	OK	5.40403	5.20542	4.66622	5.18869	5.73117	6.37624	5.1606	5.78153	4.50037	4.96138	5.68892	5.50122	4.75634	5.55388	5.00831	5.14862	7.03735	6.93684	-0.0207528	-0.111228	0.74965	0.882086	no
2019-03-07	chr2:60209935-60248385	WTLV	TGLV	OK	7.63677	6.00975	5.70693	5.60154	6.38025	5.76826	5.91246	5.016	5.79603	6.15376	5.75725	6.79274	6.21484	5.94871	5.59083	5.23411	7.85171	7.44808	-0.0761383	-0.32838	0.34315	0.586918	no
Cd302	chr2:60251992-60284484	WTLV	TGLV	OK	4.53438	3.11005	3.27205	2.86681	3.77694	4.3363	4.88865	4.95256	2.66661	2.3654	2.6223	3.57243	2.2888	2.82072	3.06896	3.1113	4.26904	5.04071	0.239716	0.663262	0.05885	0.187537	no
Itgb6	chr2:60598291-60722603	WTLV	TGLV	OK	3.05974	2.13456	2.6267	1.5177	2.71663	2.22629	3.02919	2.79235	2.77602	3.08284	3.36515	4.208	3.90091	2.86783	3.52741	2.73256	4.54172	3.24209	-0.486314	-2.02427	5e-05	0.000553274	yes
Rbms1	chr2:60750192-60963450	WTLV	TGLV	OK	10.95	7.19468	8.7777	10.8194	9.10513	9.90854	9.61334	10.9844	9.55411	9.91422	8.84047	9.31603	8.6075	7.93269	9.83589	9.82173	12.3671	12.1351	-0.0273237	-0.123007	0.73075	0.872902	no
Tank	chr2:61578559-61654171	WTLV	TGLV	OK	11.2402	6.5373	7.86493	8.20877	10.1706	7.68158	7.45284	9.35944	6.57453	5.82091	7.39867	7.44389	7.61308	7.94579	8.92669	7.62095	10.387	10.7994	0.0561772	0.194685	0.5756	0.776459	no
Psmd14	chr2:61711693-61800376	WTLV	TGLV	OK	16.3521	9.98744	10.8714	9.99181	12.4962	12.4729	11.7894	12.9104	9.93949	10.266	11.3083	11.7837	10.7956	11.5397	10.4637	10.1775	16.8524	17.4951	0.0540025	0.244492	0.49215	0.720484	no
Ifih1	chr2:62595792-62646255	WTLV	TGLV	OK	3.9999	2.49756	2.07557	2.57886	2.17481	2.17634	2.01823	2.43716	2.44367	2.95118	2.1943	1.3973	1.71409	2.39903	2.75777	2.20869	3.14078	3.24981	0.0492315	0.16262	0.6408	0.818312	no
Gca	chr2:62664326-62694109	WTLV	TGLV	OK	2.06915	1.37244	1.43599	1.59371	1.82032	1.53455	1.5536	1.47792	2.02926	2.05735	1.81623	2.65748	1.76395	2.49355	2.6346	2.49022	3.17844	2.21753	-0.519367	-1.68632	5e-05	0.000553274	yes
Fign	chr2:63971507-64098038	WTLV	TGLV	OK	1.47935	1.74723	1.58283	1.14579	1.24577	1.29085	1.28339	1.44542	1.04982	1.14606	1.23007	1.01075	1.45988	1.28569	1.19748	0.871612	1.4906	1.67771	0.170605	0.683044	0.0498	0.167094	no
Grb14	chr2:64912475-65022766	WTLV	TGLV	OK	87.4256	71.8123	71.2572	65.3562	82.3543	72.2436	85.0148	73.6834	68.8375	65.5487	66.6633	70.9007	76.0361	74.6414	76.015	74.4373	92.4628	90.868	-0.0251008	-0.157543	0.65935	0.829615	no
Cobll1	chr2:65088338-65240196	WTLV	TGLV	OK	18.9884	19.3286	14.2876	18.7954	15.9869	15.6494	17.7225	16.0675	17.6344	16.4333	14.8852	16.6786	15.4191	16.8726	15.3115	15.4807	21.5483	20.6518	-0.0613025	-0.356559	0.3133	0.55881	no
Ttc21b	chr2:66183786-66256646	WTLV	TGLV	OK	1.14876	1.25387	1.11624	0.780622	1.1731	0.919748	1.36446	1.34739	1.38931	1.29538	0.945597	1.22129	1.19245	1.35483	1.23087	1.46766	1.92504	1.68124	-0.195362	-0.622158	0.07855	0.229651	no
Scn7a	chr2:66673425-66784910	WTLV	TGLV	OK	3.0882	3.12224	3.08559	2.97011	3.57899	3.88821	3.65835	3.10506	2.50468	2.45563	2.72207	3.07963	3.29897	2.80218	2.63097	2.38161	3.76227	4.19047	0.155511	0.740522	0.0354	0.131104	no
Xirp2	chr2:67445999-67526620	WTLV	TGLV	OK	106.946	94.5753	89.164	134.442	108.142	94.8926	109.612	107.32	88.3875	91.1673	121.16	100.647	98.9052	95.5093	98.4712	92.687	124.101	123.197	-0.0105495	-0.0669269	0.8471	0.931865	no
Gm13601	chr2:67445999-67526620	WTLV	TGLV	OK	0	0	0	0	0	0.340293	0.645565	0	0	0	0	0.323207	0.562986	0	0	0.306366	88.1842	86.1143	-0.034268	-0.029605	0.9347	0.972303	no
Stk39	chr2:68210444-68471981	WTLV	TGLV	OK	39.004	33.1714	33.1658	29.212	35.814	36.0785	37.1649	29.1628	21.6477	21.3908	21.3957	20.3374	23.7882	23.2992	25.3588	20.2883	29.6222	41.496	0.486293	2.6923	5e-05	0.000553274	yes
Nostrin	chr2:69135799-69189330	WTLV	TGLV	OK	4.01687	2.37368	3.04502	4.08351	3.30801	4.30702	3.99367	3.00478	2.57022	3.95361	3.02206	1.73115	2.9612	2.8974	2.60936	2.81499	4.34703	4.63505	0.0925541	0.288034	0.4167	0.657289	no
Bbs5	chr2:69646729-69667569	WTLV	TGLV	OK	0.8032	0.416163	0.528478	0.650037	0.665423	0.61449	1.12931	0.706174	0.549086	0.296642	0.393208	1.16685	0.433108	0.414357	0.822352	0.496138	1.13489	1.31892	0.21681	0.35337	0.31735	0.562977	no
Klhl41	chr2:69670119-69684239	WTLV	TGLV	OK	20.8413	13.7611	14.1368	14.5519	16.0496	14.412	15.9617	16.5296	14.1135	15.6233	12.7609	13.1876	14.2563	15.4241	15.261	15.8988	18.9498	18.9095	-0.00307302	-0.0161115	0.9623	0.983417	no
Fastkd1	chr2:69686819-69712606	WTLV	TGLV	OK	3.79966	4.38201	3.63631	3.20729	2.61886	2.89522	3.59587	3.00909	2.48992	3.01864	3.12451	3.0593	3.86064	3.23175	3.72948	3.47436	4.58014	4.42793	-0.0487602	-0.182049	0.59965	0.791349	no
Ppig	chr2:69722818-69754059	WTLV	TGLV	OK	9.44719	8.35963	8.70497	8.72329	9.75352	9.24509	9.37404	9.47306	8.02794	7.92062	8.19853	8.26014	9.0745	7.65011	8.19803	7.30551	11.8144	12.1863	0.0447124	0.253127	0.4652	0.699061	no
Ccdc173	chr2:69757391-69789581	WTLV	TGLV	OK	0.806141	0.623825	0.899933	0.695556	0.918017	0.685274	0.941553	0.890586	0.44022	0.456347	0.0939559	0.134212	0.430068	0.902043	1.11119	0.546879	0.774997	1.09759	0.502072	0.74703	0.02135	0.0900033	no
Phospho2	chr2:69789627-69797223	WTLV	TGLV	OK	7.12284	6.99774	5.94705	6.55794	7.00869	5.73539	8.61939	6.8832	4.97811	4.84721	6.0107	5.32822	6.50386	5.61283	5.29934	5.34468	7.25139	8.32968	0.200003	0.80753	0.0222	0.0927273	no
Klhl23	chr2:69821917-69836651	WTLV	TGLV	OK	6.91831	5.92109	5.51205	5.25065	5.62215	5.56955	7.07823	5.23558	4.71033	5.12409	5.54262	5.16233	5.1603	5.97845	6.25442	6.17401	7.13982	7.07019	-0.0141381	-0.0663122	0.84935	0.93284	no
Ssb	chr2:69861561-69885910	WTLV	TGLV	OK	29.0352	22.1041	24.015	23.8104	25.1039	27.9789	28.956	28.0589	23.0516	21.5129	22.8239	23.5991	28.3012	28.8754	23.6316	24.9684	31.4718	31.162	-0.0142732	-0.0735823	0.83755	0.928139	no
Mettl5	chr2:69861561-69885910	WTLV	TGLV	OK	11.391	5.67255	9.20142	4.716	6.19989	8.60916	7.72642	6.0761	6.20842	6.28723	6.80574	8.89428	8.6123	8.15788	6.11611	5.14808	10.4744	10.3616	-0.0156202	-0.0271844	0.93885	0.974779	no
Ubr3	chr2:69896968-70024010	WTLV	TGLV	OK	29.2924	26.4327	28.0026	25.8404	26.7456	26.3347	28.3484	29.2902	22.5937	26.3866	26.7467	26.2662	27.2846	27.641	27.6165	24.3868	35.133	34.536	-0.0247269	-0.150229	0.6693	0.836554	no
Gorasp2	chr2:70661508-70691725	WTLV	TGLV	OK	14.4071	12.5078	12.7346	12.8484	12.9154	14.3455	14.2902	12.5547	12.5265	11.545	11.6548	10.3004	12.7096	14.5488	11.2489	9.52457	15.9012	16.2384	0.0302792	0.149935	0.6752	0.839909	no
Tlk1	chr2:70704092-70825816	WTLV	TGLV	OK	15.4421	13.7004	14.7452	14.5957	16.0956	15.2706	15.3926	15.8209	11.812	11.3431	12.6441	12.6603	11.7865	12.0343	10.31	11.7042	15.5965	18.3304	0.233011	1.12292	0.00195	0.0137138	yes
Mettl8	chr2:70964557-71055643	WTLV	TGLV	OK	1.21054	0.831899	1.04677	0.646794	1.40893	1.02776	1.46928	0.736854	1.48824	0.574363	1.07782	0.978761	0.622125	0.731211	0.879701	0.995776	1.42837	1.45674	0.0283748	0.0584874	0.8662	0.94063	no
Dcaf17	chr2:71055741-71116414	WTLV	TGLV	OK	0.889808	1.38126	1.28531	0.602355	1.04465	1.12216	0.607836	1.0672	0.622369	0.571825	0.891693	0.434181	0.610831	0.981197	1.18523	0.513984	1.49307	1.61527	0.113496	0.196623	0.55925	0.76599	no
Dync1i2	chr2:71211684-71263303	WTLV	TGLV	OK	20.9219	18.2245	14.2167	17.373	16.8129	19.3218	19.4234	16.1462	16.1676	14.6746	15.5579	18.4202	15.6554	18.145	16.0793	15.3401	22.583	22.6507	0.00432043	0.0230857	0.9463	0.976429	no
Slc25a12	chr2:71274269-71367554	WTLV	TGLV	OK	43.4562	38.2302	38.7211	37.4638	41.6643	40.4499	42.1908	39.8885	35.2185	38.3165	34.5374	39.8875	42.7546	40.1396	36.9867	40.4475	49.8351	48.0343	-0.0530978	-0.32647	0.35095	0.59501	no
Hat1	chr2:71389259-71441622	WTLV	TGLV	OK	6.82947	6.16569	5.17207	5.87098	5.82224	4.30873	6.6623	7.16881	6.11218	5.53543	6.26884	5.00821	5.00979	6.16559	5.59932	5.0296	7.70647	7.77914	0.013541	0.0484797	0.8922	0.954062	no
Metap1d	chr2:71453280-71525196	WTLV	TGLV	OK	9.53474	10.4912	8.71652	10.984	10.6653	10.2362	12.7183	9.62897	7.26215	10.0549	9.50061	9.64719	10.6957	8.99828	10.105	8.49267	12.9316	13.3412	0.0449916	0.16226	0.6327	0.813501	no
Itga6	chr2:71786885-71858427	WTLV	TGLV	OK	8.58781	6.8435	7.97228	10.4665	8.38409	8.73475	7.55799	6.82451	7.19835	6.44221	7.51656	6.16192	7.26585	7.91787	7.95977	7.18342	10.3473	10.7818	0.059352	0.328419	0.35435	0.598283	no
Pdk1	chr2:71873212-71903858	WTLV	TGLV	OK	14.3235	13.1739	13.0993	15.5101	14.2291	14.3938	14.4445	14.139	16.7375	16.6191	16.169	17.7964	18.6429	16.2922	16.0341	16.907	21.8601	16.8745	-0.373455	-2.14399	5e-05	0.000553274	yes
Rapgef4	chr2:71981214-72257474	WTLV	TGLV	OK	3.59338	4.35105	4.56956	5.17899	5.14342	5.13239	4.43275	4.73872	5.35424	5.5365	5.7987	5.2737	5.11913	6.10941	4.78667	5.11706	8.2549	6.78073	-0.283811	-1.33929	0.0002	0.00193127	yes
Zak	chr2:72285636-72442610	WTLV	TGLV	OK	54.6187	46.8596	45.6127	47.4322	49.2862	49.4029	53.6102	49.1884	41.3867	41.6331	45.7802	42.5714	44.0965	44.8565	45.9365	42.224	56.2987	59.2327	0.0732923	0.477058	0.1717	0.387973	no
Sp3	chr2:72936429-72989249	WTLV	TGLV	OK	6.83114	6.40815	7.72391	6.23664	8.70991	7.6241	7.9012	7.41084	6.22105	5.95006	5.89463	6.8222	7.08704	6.85871	6.13668	6.12722	8.25276	8.86727	0.103614	0.481036	0.17445	0.391569	no
Sp3os	chr2:72936429-72989249	WTLV	TGLV	OK	3.21432	1.46522	2.67439	2.65145	2.60016	1.84843	2.20657	3.56758	1.76791	2.54522	2.38987	3.30608	3.72068	2.01771	3.65849	3.10253	4.27634	3.56433	-0.262748	-0.329398	0.3541	0.598121	no
Ola1	chr2:73092800-73214447	WTLV	TGLV	OK	10.5188	8.70973	8.45996	9.87176	10.3216	8.17086	9.31372	8.79475	9.33979	8.56391	7.94742	9.05343	8.80258	8.94451	9.4463	9.20324	13.5471	13.3302	-0.0232834	-0.0938685	0.7858	0.900875	no
Cir1	chr2:73283871-73312592	WTLV	TGLV	OK	3.47679	4.47252	2.43302	2.88144	3.74864	3.73605	4.05484	3.43226	3.15415	3.66283	3.79762	3.5623	3.42847	3.51958	3.77978	3.85657	8.41194	7.879	-0.094426	-0.371998	0.27935	0.522192	no
Scrn3	chr2:73312651-73337818	WTLV	TGLV	OK	4.75297	4.7023	3.92632	3.66607	4.55702	5.05246	4.40399	4.87319	5.68281	4.7598	4.99189	4.22258	5.03448	5.50834	4.83351	4.33056	6.6423	5.59928	-0.24644	-0.773787	0.0276	0.109264	no
Gpr155	chr2:73341505-73386851	WTLV	TGLV	OK	1.59402	1.447	1.50437	1.1693	1.53116	1.68071	1.75375	1.94681	1.34987	0.96301	0.77362	1.76568	1.21901	1.48082	1.46236	1.46118	1.88283	2.10314	0.159647	0.5349	0.12655	0.318502	no
Wipf1	chr2:73429609-73529726	WTLV	TGLV	OK	3.47759	2.05239	2.7169	3.37312	4.13096	2.60514	2.90552	3.27822	2.16422	2.76177	2.66519	2.84167	2.17892	2.54412	3.4369	2.55133	3.49133	3.7606	0.107186	0.431582	0.21665	0.449369	no
Chn1	chr2:73596525-73775367	WTLV	TGLV	OK	7.70435	6.12498	5.17705	5.88851	8.62533	5.38454	6.67446	4.89518	5.55766	6.8054	4.96249	7.7711	6.75079	5.04316	6.49395	5.96438	9.28539	9.0765	-0.0328261	-0.0924829	0.788	0.901878	no
Atf2	chr2:73816508-73892639	WTLV	TGLV	OK	5.81524	4.27731	5.57143	4.09614	5.59002	5.2629	5.59321	5.41321	4.31803	3.98216	4.62087	5.31065	4.27338	4.7607	4.84296	4.21897	6.1802	6.34177	0.0372311	0.17016	0.625	0.807727	no
Atp5g3	chr2:73908446-73911326	WTLV	TGLV	OK	507.222	454.549	455.699	434.762	468.993	487.382	501.909	459.356	495.396	464.969	475.889	485.967	509.41	477.123	492.108	492.428	629.772	563.004	-0.161684	-1.05736	0.0029	0.0187762	yes
Lnp	chr2:74514835-74579458	WTLV	TGLV	OK	1.65678	1.34208	1.52745	1.34206	1.42278	1.48677	1.96004	1.81176	1.3464	1.49814	1.29506	1.46932	1.24067	1.54738	1.46166	1.3198	1.91926	1.95801	0.0288362	0.118417	0.7399	0.877861	no
Mtx2	chr2:74825811-74876748	WTLV	TGLV	OK	30.3009	25.1002	25.7621	21.614	29.6678	22.8985	24.1201	27.1081	23.5228	22.2031	26.3488	23.5657	24.0604	25.6502	22.3317	25.2609	32.2834	31.3045	-0.044425	-0.22009	0.5315	0.746334	no
Hnrnpa3	chr2:75659215-75669407	WTLV	TGLV	OK	4.6704	3.96353	4.54927	4.30423	4.59641	5.21886	4.79101	5.23093	4.80187	4.32157	4.78571	5.33578	4.86476	4.94098	4.59782	4.00884	22.0547	20.6449	-0.0953019	-0.50155	0.15915	0.369424	no
Nfe2l2	chr2:75675512-75704663	WTLV	TGLV	OK	14.912	14.1486	12.0581	15.3516	16.6561	17.9519	20.3872	14.266	11.5042	14.1842	13.7959	11.3911	12.6381	11.6808	12.6444	13.3519	16.4119	18.8317	0.198423	1.0137	0.0037	0.0228192	yes
Agps	chr2:75832176-75931350	WTLV	TGLV	OK	2.21215	2.40925	1.94284	2.33631	2.01333	2.28092	2.17486	1.93015	1.95868	2.10553	2.12963	2.38872	2.36908	2.95868	2.14956	2.5895	3.36639	2.93941	-0.195676	-0.880128	0.01175	0.0575531	no
Ttc30b	chr2:75935848-75938462	WTLV	TGLV	OK	4.18724	3.67504	2.78763	3.81085	3.28682	3.59527	3.03761	3.52156	3.31923	3.81348	2.90477	3.24649	2.57687	3.36766	3.99753	3.48961	3.24241	3.16579	-0.0345008	-0.110224	0.7554	0.884716	no
Rbm45	chr2:76369957-76383768	WTLV	TGLV	OK	5.25649	4.45376	4.57626	6.01752	4.80023	4.69384	3.97604	5.29312	3.83662	3.06741	4.58392	4.70777	5.23955	4.14561	4.17093	4.83623	5.77156	6.38709	0.146198	0.434048	0.21795	0.450486	no
Osbpl6	chr2:76406507-76600647	WTLV	TGLV	OK	3.12261	2.8239	3.62326	2.39798	2.33377	2.92124	2.53991	3.38545	2.32815	2.7866	1.57802	1.87215	2.58916	1.69286	1.9557	2.03943	3.26486	3.78625	0.213748	0.564729	0.10025	0.273008	no
Prkra	chr2:76609214-76648198	WTLV	TGLV	OK	2.09482	4.06965	2.0876	2.78091	3.00864	2.4734	3.88298	2.70749	3.1812	1.81187	2.61752	1.93689	2.48936	3.3593	3.42913	1.90194	3.72015	3.74049	0.00786743	0.021339	0.9539	0.979571	no
Fkbp7	chr2:76663033-76673141	WTLV	TGLV	OK	10.3183	8.36942	11.9394	8.85711	9.16624	8.17857	8.38426	10.6999	7.15939	7.74687	8.21319	9.01921	7.93224	6.58397	11.0139	7.27286	11.0838	11.6974	0.077737	0.248415	0.4776	0.708672	no
Plekha3	chr2:76675303-76697335	WTLV	TGLV	OK	5.27031	4.7308	4.29116	5.1094	5.48447	4.31474	5.05656	4.36634	3.83622	3.72282	3.28669	3.95819	4.13152	3.7535	4.07343	3.27585	5.13592	6.23585	0.279963	1.04525	0.00265	0.0174829	yes
Ccdc141	chr2:77009901-77173768	WTLV	TGLV	OK	25.9904	25.1235	23.1762	18.8033	21.2783	24.6491	24.1225	22.1094	30.2335	28.4134	26.9976	27.5611	32.0367	30.61	31.1483	29.463	38.4638	27.8637	-0.465116	-2.72493	5e-05	0.000553274	yes
Gm39861	chr2:77009901-77173768	WTLV	TGLV	OK	0.961124	0.44625	0.751355	0.483649	0.600458	0.919137	0.765386	1.30003	1.74951	2.57288	1.00826	0.683456	0.461478	1.61318	1.23005	1.74641	1.78778	0.918734	-0.960448	-0.355014	0.595	0.789219	no
Sestd1	chr2:77180339-77280592	WTLV	TGLV	OK	2.46743	2.2871	2.26168	2.21452	2.15067	2.40476	1.85792	2.50187	2.23858	1.60112	1.57287	1.77403	1.96665	2.21225	1.98773	1.71464	3.13392	3.57754	0.191002	0.867007	0.01465	0.0679854	no
Zfp385b	chr2:77410621-77817706	WTLV	TGLV	OK	0.980832	0.770737	0.503379	0.677881	1.10557	0.828662	0.602588	0.745807	0.811478	1.55936	1.18367	1.30351	0.921407	0.872203	1.06649	0.908959	1.61428	1.08406	-0.574447	-1.21699	0.0002	0.00193127	yes
Cwc22	chr2:77895652-77946356	WTLV	TGLV	OK	3.29224	2.02646	1.83513	2.44266	2.90763	2.62976	1.75069	2.1854	2.21634	2.01125	1.53623	1.79071	1.99534	2.2049	2.1032	1.67946	3.75781	4.43459	0.238911	0.896098	0.01065	0.0531332	no
Ube2e3	chr2:78868242-78921288	WTLV	TGLV	OK	18.6115	17.3377	16.9441	12.9057	16.0993	17.6338	20.7862	18.1416	15.0148	14.9911	11.5391	14.1577	14.6623	14.8857	15.8248	12.5974	18.6169	21.4504	0.204395	0.954724	0.00755	0.0404479	yes
Ssfa2	chr2:79635259-79672966	WTLV	TGLV	OK	4.66512	4.63695	4.42844	5.41382	5.41746	5.1976	5.30465	6.26629	3.48311	3.83973	4.20466	4.06268	4.34923	4.16224	4.88071	3.85919	5.70247	6.55748	0.201556	0.971607	0.0052	0.030286	yes
Pde1a	chr2:79834452-80196522	WTLV	TGLV	OK	3.18745	2.29703	2.69494	1.81199	3.65064	2.64129	1.98633	3.07227	1.26064	1.7271	1.99106	1.57771	1.90704	1.9878	1.55066	1.41894	2.44319	3.6536	0.580552	1.18694	0.0015	0.0110551	yes
Dnajc10	chr2:80315450-80354055	WTLV	TGLV	OK	7.55334	5.62721	5.99672	6.00624	7.80049	6.42019	6.95583	6.55495	5.12893	5.62418	6.44738	5.04342	5.39363	5.38902	5.46659	4.70676	7.28585	8.00756	0.136266	0.650008	0.06365	0.198397	no
Frzb	chr2:80411969-80447396	WTLV	TGLV	OK	0.599319	0.667833	0.758994	0.820309	1.59504	0.91702	0.870531	1.02142	0.628374	0.487721	0.502967	0.332417	0.276249	0.351155	0.828373	0.403917	0.705872	1.1091	0.651917	1.29982	0.00025	0.00236014	yes
Nckap1	chr2:80500511-80581299	WTLV	TGLV	OK	18.3852	16.2103	14.8181	17.5112	19.1874	16.7511	19.5298	16.8505	14.1573	12.6944	14.3497	13.2357	14.4892	15.5943	14.0217	14.2676	18.8582	21.0111	0.155955	0.905931	0.00995	0.0503416	no
Dusp19	chr2:80617213-80631661	WTLV	TGLV	OK	0.671812	1.53562	1.33316	1.0402	1.11385	1.08725	0.987681	0.786379	0.846613	0.664027	0.596333	0.440978	1.09176	0.851605	0.843255	0.512188	1.02527	1.32604	0.371113	0.602067	0.08765	0.2481	no
Nup35	chr2:80638811-80660071	WTLV	TGLV	OK	0.450699	0.286985	0.3926	0.479515	0.349955	0.603385	0.393748	0.339615	0.407821	0.441235	0.25663	0.274708	0.222553	0.259331	0.494377	0.255223	1.35712	1.28243	-0.0816636	-0.18781	0.5924	0.787758	no
Zc3h15	chr2:83644577-83664617	WTLV	TGLV	OK	17.2001	13.5152	14.3621	15.6471	15.8295	15.735	14.8867	17.1047	13.9897	14.0921	16.4391	14.6693	14.6634	16.78	13.6563	13.6794	22.8138	22.5408	-0.0173724	-0.0893318	0.80105	0.908148	no
Itgav	chr2:83724107-83806917	WTLV	TGLV	OK	3.11863	3.08244	3.61211	3.10159	3.67963	3.8253	3.53978	3.46454	2.96241	3.51285	3.23563	3.23034	3.56968	3.19625	3.45863	3.02475	4.52563	4.38338	-0.0460724	-0.223102	0.5251	0.743169	no
Calcrl	chr2:84330625-84425426	WTLV	TGLV	OK	4.79715	4.52273	4.81831	6.26385	5.31819	4.8116	4.46209	4.51892	4.74664	4.95368	4.37834	4.03041	4.51151	3.99785	4.0268	4.24189	5.85007	6.11989	0.0650518	0.306908	0.388	0.63036	no
Tfpi	chr2:84432854-84476833	WTLV	TGLV	OK	16.1998	14.9774	18.8456	8.76193	12.61	13.1718	15.2886	16.0738	17.1009	17.2024	18.9726	21.1402	19.2609	20.5006	21.2325	15.6573	24.7481	17.6245	-0.489734	-2.06783	5e-05	0.000553274	yes
Ctnnd1	chr2:84600780-84658972	WTLV	TGLV	OK	9.52209	7.29368	8.66014	9.08336	8.99956	8.4475	8.78333	8.95082	8.26756	8.17296	8.76367	8.09722	8.27403	9.0169	9.44386	7.96811	11.2067	10.6955	-0.0673492	-0.365087	0.29675	0.542269	no
2700094K13Rik	chr2:84669214-84670708	WTLV	TGLV	OK	6.47843	7.01851	8.65536	6.65588	5.73567	4.25935	4.77213	7.25672	6.05723	5.34724	4.81392	8.35042	6.60998	7.41385	4.37196	4.94945	8.36046	8.45926	0.0169482	0.0421465	0.9052	0.959549	no
Tmx2	chr2:84671310-84717752	WTLV	TGLV	OK	12.9388	10.7271	11.3424	9.79033	11.561	10.1404	12.0861	10.5715	9.52801	9.12574	11.1997	10.8814	10.515	10.1573	9.44227	10.7793	13.2494	12.6894	-0.062306	-0.159823	0.651	0.824307	no
Med19	chr2:84671310-84717752	WTLV	TGLV	OK	6.039	4.15272	4.34888	4.06963	5.24484	5.07881	5.51388	5.17669	3.40161	4.21618	4.2737	2.88247	3.88763	3.88298	4.29151	4.00301	5.08644	5.97807	0.233026	0.400931	0.25165	0.490568	no
Zdhhc5	chr2:84671310-84717752	WTLV	TGLV	OK	14.032	11.9841	13.0475	13.7195	12.7676	13.2125	14.0278	14.4173	12.6599	12.6404	13.5996	12.1855	14.7928	13.5302	13.0224	13.7817	16.415	15.5499	-0.0781109	-0.35872	0.30705	0.551655	no
Gm32289	chr2:84671310-84717752	WTLV	TGLV	OK	0.201307	0.211178	0.146744	0.0781262	0.474404	0.143038	0.0708709	0.208019	0.25379	0.215743	0.163571	0.0828531	0.471192	0.117242	0.194767	0.125959	1.67607	1.32692	-0.337002	-0.368964	0.29435	0.539741	no
Clp1	chr2:84723121-84727268	WTLV	TGLV	OK	1.00065	0.483187	0.70403	0.523682	0.675165	0.803829	1.03274	0.8121	0.306006	0.514309	0.79779	0.725796	0.768732	0.916104	0.345773	1.26946	0.930368	0.910061	-0.0318373	-0.0521475	0.88	0.94675	no
Serping1	chr2:84765359-84775444	WTLV	TGLV	OK	41.3609	31.6387	35.9858	38.7082	50.0874	42.173	34.3679	43.8384	26.1273	28.2005	23.9098	18.9014	22.315	21.3112	23.9285	21.3134	30.0683	47.2634	0.65248	3.61449	5e-05	0.000553274	yes
Ube2l6	chr2:84798827-84810003	WTLV	TGLV	OK	5.12548	3.44912	4.02391	3.07732	3.73383	4.13844	3.34143	4.23217	2.81989	3.22453	2.30951	2.5663	2.84759	1.73246	3.43155	3.35581	4.47321	5.32517	0.251516	0.721112	0.04075	0.14519	no
Timm10	chr2:84827020-84830213	WTLV	TGLV	OK	28.0994	28.1806	33.4442	34.3601	30.414	29.4248	36.2505	30.0737	36.0599	39.7166	41.4158	37.7651	37.5072	34.9863	33.04	32.8628	47.1474	37.4959	-0.330447	-1.42778	5e-05	0.000553274	yes
Slc43a3	chr2:84936543-84958509	WTLV	TGLV	OK	10.2806	10.1585	8.83083	12.1739	12.0323	11.0021	13.429	9.56909	10.1287	9.89498	7.37505	9.49777	8.75554	8.89865	9.28131	9.40879	12.4682	13.3029	0.0934846	0.440204	0.21285	0.4439	no
Ssrp1	chr2:85037119-85047114	WTLV	TGLV	OK	13.3812	9.76862	13.5763	11.0547	13.0354	12.0822	11.5246	13.3135	11.8274	11.016	9.16941	10.7536	11.4514	9.97238	9.82518	10.7502	14.1856	14.8803	0.0689667	0.338503	0.3389	0.58319	no
Tnks1bp1	chr2:85048012-85073048	WTLV	TGLV	OK	5.16658	5.13814	5.10525	5.71452	6.10371	5.66458	5.17078	5.94694	5.30308	4.75876	4.76207	5.10644	5.38327	5.02973	5.57062	5.26238	6.71083	6.67972	-0.00670508	-0.0338923	0.9228	0.968056	no
Aplnr	chr2:85136359-85139923	WTLV	TGLV	OK	5.09703	3.54533	6.74954	7.06075	6.08416	4.80023	2.92618	6.11446	4.97414	4.0259	5.36731	4.60987	5.65766	5.37607	6.75264	5.20542	6.73175	6.30066	-0.0954793	-0.423065	0.2325	0.46749	no
Olfr1033	chr2:86020639-86044808	WTLV	TGLV	OK	1.79669	1.18427	1.54359	1.69588	1.32894	2.06628	1.45827	1.56332	1.90884	1.58568	1.59905	1.17158	1.7315	1.0757	1.40901	1.18086	7.23046	8.16811	0.175916	0.742831	0.0373	0.136348	no
Ptprj	chr2:90429755-90580679	WTLV	TGLV	OK	2.03887	1.81767	2.12998	2.27606	2.52132	2.50313	1.63962	2.37958	1.30158	1.82583	1.44122	1.30317	1.44427	1.82944	1.84241	1.59303	2.28074	2.8824	0.337768	1.12009	0.00125	0.00948444	yes
Nup160	chr2:90677214-90739327	WTLV	TGLV	OK	1.31791	1.09701	0.926673	1.29615	1.04547	1.28718	1.01034	1.09999	0.480125	0.825783	1.06158	1.15311	0.944672	1.08318	1.30099	0.993014	1.51564	1.62328	0.0989838	0.315294	0.3708	0.614399	no
Fnbp4	chr2:90745369-90781021	WTLV	TGLV	OK	3.22467	3.083	3.22297	3.34275	4.08081	3.67371	3.85884	3.22357	2.76914	2.45396	2.84488	3.08097	2.65761	3.06819	3.19189	2.87471	4.11948	4.50018	0.127522	0.43624	0.21105	0.441704	no
Mtch2	chr2:90847123-90866810	WTLV	TGLV	OK	22.0764	18.8003	17.6025	17.7382	16.6939	16.886	19.4398	15.958	20.104	21.9623	16.0852	21.5698	21.5211	21.4824	19.4889	19.0534	38.1236	33.0086	-0.207842	-0.979034	0.00545	0.0314632	yes
C1qtnf4	chr2:90885387-90890526	WTLV	TGLV	OK	3.18048	1.38672	2.26694	1.75407	2.04543	1.96805	2.44336	1.32855	2.11013	1.6694	1.24299	1.32838	1.37737	1.6557	1.79576	0.927122	1.9451	2.42106	0.315795	0.612532	0.07575	0.223788	no
Ndufs3	chr2:90894635-90904721	WTLV	TGLV	OK	76.3772	55.889	66.9855	62.6172	66.195	69.9721	69.9068	67.7313	64.3349	70.1989	71.1053	73.3823	78.1076	66.4203	72.3504	67.967	104.045	87.6196	-0.247878	-1.41164	5e-05	0.000553274	yes
Kbtbd4	chr2:90904739-90910561	WTLV	TGLV	OK	3.31985	3.57522	2.98554	2.3346	3.15548	4.47529	3.85354	3.69164	3.4922	3.02361	2.77663	3.39427	3.35562	3.67562	3.43095	3.15388	4.33972	4.18628	-0.0519324	-0.177707	0.6093	0.797875	no
Ptpmt1	chr2:90910712-90918050	WTLV	TGLV	OK	7.27967	6.16503	6.00954	5.50948	7.96799	5.40224	5.78785	6.676	4.83397	5.6747	6.47589	5.96342	6.15171	6.29137	5.03095	5.42569	7.24559	7.24016	-0.0010813	-0.00352103	0.9941	0.997304	no
Celf1	chr2:90940386-91019497	WTLV	TGLV	OK	12.1054	9.77087	10.2164	10.8411	10.2949	10.2773	12.0199	10.2819	8.70462	8.62618	9.07653	9.06265	9.68077	9.05491	8.44718	8.51507	11.7107	13.1179	0.163712	0.881091	0.01165	0.0571343	no
Rapsn	chr2:91035458-91053938	WTLV	TGLV	OK	1.90704	2.44891	3.2433	2.22607	2.60621	2.82417	2.37861	1.72492	2.50946	1.86736	2.10023	3.48027	2.63888	3.09151	2.24144	2.40107	3.44145	3.07258	-0.163565	-0.414486	0.24115	0.477569	no
Psmc3	chr2:91054015-91059438	WTLV	TGLV	OK	60.5711	52.3615	53.6434	52.1732	57.3589	61.9259	57.7957	55.3117	56.8665	58.5283	58.0556	62.4741	62.4889	58.6173	59.6236	57.1487	76.3119	67.2172	-0.183077	-1.10186	0.0012	0.00915794	yes
Slc39a13	chr2:91061780-91071623	WTLV	TGLV	OK	5.64998	4.36335	4.4469	6.50185	5.68585	5.65679	6.29601	5.77854	4.1269	5.16094	4.40557	3.63648	4.72809	3.57172	3.13705	3.94828	5.37032	6.7931	0.339061	1.23401	0.0003	0.00278329	yes
Spi1	chr2:91082373-91115759	WTLV	TGLV	OK	1.93327	1.90848	3.54396	2.75453	2.8669	1.63779	1.79201	2.81963	1.65121	1.74823	0.859116	1.86883	1.27325	1.60366	1.60037	0.966756	2.00249	3.0619	0.612627	1.30418	0.0004	0.00354693	yes
Mybpc3	chr2:91118113-91136516	WTLV	TGLV	OK	412.926	415.512	362.548	457.723	419.982	378.88	395.206	373.815	414.065	402.877	487.937	408.089	450.004	413.965	446.128	430.424	601.804	520.411	-0.209645	-1.30305	0.00015	0.00149861	yes
Madd	chr2:91137359-91183958	WTLV	TGLV	OK	0.763332	0.434592	1.08667	0.982174	1.26026	1.2059	0.791519	0.896655	0.73979	0.810095	0.673359	1.02361	1.10468	0.87706	0.741573	0.842202	1.30423	1.30153	-0.00298702	-0.0092659	0.9789	0.990929	no
Nr1h3	chr2:91184060-91237132	WTLV	TGLV	OK	5.35385	4.80299	4.83089	4.70706	4.58092	3.9338	5.26531	5.18012	4.03309	4.08749	3.03405	2.91056	4.2014	3.71417	3.2837	2.94664	4.91511	6.12241	0.316876	0.707126	0.04705	0.160437	no
Acp2	chr2:91184060-91237132	WTLV	TGLV	OK	6.18149	4.23598	3.98742	4.0446	4.58779	5.26986	3.49511	4.17506	4.29966	2.3961	3.46784	2.97141	2.95038	4.2498	3.24593	4.28697	5.0535	5.66373	0.164472	0.301231	0.4002	0.642469	no
Ddb2	chr2:91184060-91237132	WTLV	TGLV	OK	0.820384	0.307601	0.805011	0.523974	0.385377	0.475326	0.288185	0.586905	0.997248	0.933902	0.235702	0.588289	0.597822	0.0508807	0.675809	0.389803	1.94293	1.87708	-0.0497424	-0.0676309	0.84555	0.931286	no
A330069E16Rik	chr2:91237145-91238357	WTLV	TGLV	OK	0.566763	0.877161	0.34021	0.0950673	0.708166	0.45167	0.81241	0.383307	0.515834	1.41605	0.990928	0.503782	0.997803	0.26609	0.997353	0.0936215	1.37435	1.06496	-0.367952	-0.458038	0.1918	0.418077	no
Pacsin3	chr2:91256097-91264680	WTLV	TGLV	OK	38.7107	34.7139	32.6631	34.9397	40.5851	35.8553	39.7313	37.7119	36.495	38.1619	36.1475	37.3856	44.9938	41.068	39.4389	37.0044	50.9312	44.611	-0.191149	-1.10377	0.00125	0.00948444	yes
Arfgap2	chr2:91265114-91444714	WTLV	TGLV	OK	3.93699	2.48674	4.01823	3.89668	3.60863	4.69679	3.53052	4.47241	3.03513	3.25413	2.8833	3.14569	3.25726	3.32638	3.67952	3.83987	4.06055	3.98695	-0.0263917	-0.0802539	0.8196	0.917744	no
1110051M20Rik	chr2:91265114-91444714	WTLV	TGLV	OK	2.08873	2.15835	2.57661	2.23868	2.1666	3.14224	1.98434	2.24107	1.81237	1.51823	1.87116	2.18348	1.54098	1.35256	2.1825	1.58943	3.89322	4.43066	0.186555	0.493514	0.16565	0.378715	no
Lrp4	chr2:91457470-91513901	WTLV	TGLV	OK	1.57956	2.02158	2.15674	1.28195	1.72777	1.48882	1.70256	2.08932	1.21666	1.00267	0.783873	1.25532	1.23183	1.08349	1.26856	0.894753	1.69198	2.29393	0.43911	1.61799	5e-05	0.000553274	yes
Ckap5	chr2:91526746-91636457	WTLV	TGLV	OK	8.57875	9.0729	7.80831	8.38133	9.66247	7.80989	8.3125	8.8668	8.25349	6.9453	7.068	8.08182	8.61552	7.89918	8.62932	7.5049	10.9814	10.8062	-0.0232009	-0.131736	0.7086	0.859756	no
Arhgap1	chr2:91642755-91672325	WTLV	TGLV	OK	3.85869	3.44681	3.40918	4.14333	3.67453	3.59726	4.305	4.48649	3.24325	2.99492	2.65251	2.39454	2.91368	2.95118	3.22314	2.5799	4.80395	5.64307	0.232257	0.82902	0.01695	0.075661	no
Atg13	chr2:91674611-91710599	WTLV	TGLV	OK	9.0961	7.89605	8.30974	12.2733	9.2023	8.3538	7.53921	10.2836	4.58561	4.41978	4.71861	4.35384	4.1367	4.43595	3.9956	3.44225	5.87511	11.5149	0.97081	4.53628	5e-05	0.000553274	yes
Harbi1	chr2:91710854-91721567	WTLV	TGLV	OK	2.45179	2.32536	1.36282	1.65889	2.0494	2.46533	1.15478	2.27098	1.39311	1.73922	1.04852	1.66309	1.27477	1.93565	1.44997	1.52077	2.04318	2.48198	0.280676	0.721366	0.04005	0.143344	no
Ambra1	chr2:91730110-91918849	WTLV	TGLV	OK	2.65215	3.15277	2.63399	2.61134	2.53612	3.0271	3.0667	2.64948	2.40893	1.8349	1.94472	2.82128	2.1979	2.49136	1.92305	1.86581	3.10389	3.56585	0.200167	0.820232	0.0198	0.0849526	no
Mdk	chr2:91921696-91976443	WTLV	TGLV	OK	0.782653	0.934404	0.398791	0.45636	2.2309	1.15047	2.1666	1.0208	1.58751	1.80884	1.64204	0.241835	0.21772	0.921247	0.75122	0.664875	1.47178	1.84896	0.329148	0.19539	0.5064	0.731549	no
Dgkz	chr2:91921696-91976443	WTLV	TGLV	OK	6.08862	7.30581	5.95078	7.67272	7.38406	7.12719	6.76239	7.24412	5.18686	5.9379	5.17186	6.59168	7.02323	7.24371	6.74368	6.56808	8.63764	8.79862	0.0266386	0.11773	0.7364	0.875524	no
Creb3l1	chr2:91982327-92045252	WTLV	TGLV	OK	3.18084	2.69053	3.10211	2.34549	3.54158	4.48754	2.82899	3.41854	1.30706	1.95591	2.01531	2.41867	2.35894	1.70112	1.39054	1.21734	2.54173	4.08386	0.684123	2.02293	5e-05	0.000553274	yes
Phf21a	chr2:92183744-92364667	WTLV	TGLV	OK	5.04433	4.56377	4.09345	4.38346	7.21354	5.56228	4.59607	5.5977	3.83072	3.63357	3.50763	4.43704	4.37577	4.69189	3.81509	3.83608	6.0254	6.77691	0.169571	0.620677	0.06685	0.205394	no
Pex16	chr2:92374675-92381220	WTLV	TGLV	OK	3.61103	4.13125	4.25458	2.51867	3.67861	4.50636	3.66179	2.69426	4.51935	3.19092	3.3314	3.58291	4.43357	3.7231	3.75797	4.6568	5.69403	4.89155	-0.219159	-0.551272	0.1136	0.297295	no
Mapk8ip1	chr2:92383675-92401263	WTLV	TGLV	OK	0.869929	0.787998	0.789932	0.852107	1.60293	1.02118	0.831247	0.895159	0.950063	0.496408	0.757625	0.742125	0.641564	0.327519	1.03447	0.862002	1.0304	1.27061	0.302326	0.622648	0.07	0.212315	no
Cry2	chr2:92403645-92434214	WTLV	TGLV	OK	3.79822	4.95301	3.16979	3.70213	4.12665	2.98627	5.51995	3.3531	4.28696	3.38608	3.46507	2.79446	3.29318	4.02028	3.87163	4.89502	5.12619	5.03245	-0.0266254	-0.0897742	0.79955	0.907143	no
Slc35c1	chr2:92452763-92460518	WTLV	TGLV	OK	1.50859	1.38399	1.31072	1.68696	1.62031	1.24708	1.44807	1.51183	1.60285	1.5387	1.47933	1.50326	1.30342	1.02273	1.17433	1.42354	1.79784	1.75096	-0.0381215	-0.0980228	0.7834	0.899808	no
Prdm11	chr2:92974905-93046144	WTLV	TGLV	OK	0.781321	0.725535	0.870382	0.550438	0.7688	0.784549	0.335989	0.752991	0.341334	0.627467	0.368837	1.16676	0.787809	0.67954	1.12493	0.619505	1.05324	0.861949	-0.289164	-0.348558	0.32835	0.573376	no
4631405J19Rik	chr2:92974905-93046144	WTLV	TGLV	OK	4.74993	3.70506	3.04485	3.05948	3.14555	2.96772	3.93388	3.79065	2.42093	2.17008	2.72396	2.22927	2.73678	1.50751	2.24923	1.82033	2.95809	4.34451	0.554527	1.10413	0.0039	0.0238908	yes
Trp53i11	chr2:93187532-93201757	WTLV	TGLV	OK	9.13827	4.34801	7.54634	9.58959	8.71694	9.95252	4.55259	6.99013	6.61582	7.07329	7.2228	7.05964	5.40201	5.83645	7.81285	7.81354	9.14463	9.14773	0.000489684	0.00215223	0.9947	0.997702	no
Tspan18	chr2:93201759-93334553	WTLV	TGLV	OK	2.51607	1.61303	2.85809	2.4381	3.10792	3.08625	2.15363	2.65708	2.4335	2.26735	1.98865	1.74287	2.25883	2.18916	3.26008	2.24187	3.04106	3.1014	0.0283459	0.0925392	0.7934	0.903452	no
Cd82	chr2:93419101-93469874	WTLV	TGLV	OK	3.98393	3.23137	2.25488	2.58019	2.31734	5.03537	3.06307	3.01936	2.05046	1.96207	1.87352	2.78419	2.19874	2.138	2.94413	2.17855	3.22132	4.13506	0.360257	0.969057	0.00435	0.0260802	yes
Ext2	chr2:93695630-93822583	WTLV	TGLV	OK	6.86002	5.32777	6.00392	5.37814	8.66529	6.78026	6.40333	6.78598	5.67921	5.70424	5.90129	4.2966	7.33803	5.83406	5.13179	5.15376	7.70411	8.00567	0.0553942	0.240804	0.4918	0.720166	no
Gm13889	chr2:93951304-93957740	WTLV	TGLV	OK	2.87242	1.2781	2.94722	1.1443	3.08435	1.77406	0.914975	2.73184	1.11108	2.11456	1.25553	1.53194	1.32171	0.712216	2.75711	1.1269	1.91437	2.47267	0.369197	0.730544	0.0383	0.138802	no
Alkbh3	chr2:93980033-94010823	WTLV	TGLV	OK	13.936	11.0673	11.2194	11.2556	12.8014	12.6564	12.0394	14.8878	8.31798	10.0025	8.60738	8.92992	10.1231	10.5142	10.2318	9.90994	12.9953	15.6098	0.264472	0.994649	0.005	0.0293087	yes
Hsd17b12	chr2:94032696-94157909	WTLV	TGLV	OK	5.2942	3.36371	4.80776	3.52543	5.46488	4.68225	4.26039	4.72466	3.86926	4.13447	4.92745	4.37329	4.3959	4.1909	4.08825	4.49758	6.10476	5.7684	-0.0817636	-0.284471	0.4218	0.661646	no
Ttc17	chr2:94300765-94406689	WTLV	TGLV	OK	6.66017	6.53557	6.58796	5.01783	6.22717	5.82132	5.58302	6.93885	5.47872	4.98929	5.25066	6.02488	6.49612	5.53958	5.386	5.03641	7.68679	7.93555	0.0459495	0.219855	0.53015	0.745234	no
2810002D19Rik	chr2:94406706-94411682	WTLV	TGLV	OK	2.2874	1.65206	0.715266	1.17663	1.33377	1.55554	1.84585	1.39229	1.49893	1.30629	1.43974	2.76517	1.75725	1.48916	1.26855	1.96481	2.25914	1.81726	-0.314009	-0.652199	0.06675	0.205194	no
Api5	chr2:94411726-94438186	WTLV	TGLV	OK	5.52329	3.42771	3.92669	3.89089	5.71933	5.04554	4.42303	5.02646	3.569	4.30556	3.75274	4.59863	4.63212	4.05855	4.0742	4.50491	6.09642	6.0982	0.000421399	0.00187244	0.99545	0.997943	no
B230118H07Rik	chr2:101560780-101632528	WTLV	TGLV	OK	28.2353	20.9114	23.6205	26.0371	26.999	24.0842	26.8366	25.754	24.457	28.4214	24.0632	29.1369	28.4652	24.3014	26.1801	27.9161	35.3657	30.8741	-0.195953	-0.910909	0.0104	0.052172	no
Traf6	chr2:101678419-101701668	WTLV	TGLV	OK	1.39983	1.52726	1.51904	1.23571	1.73213	1.54147	1.66923	1.863	1.08283	1.15814	1.12256	1.28562	1.05569	1.15714	1.31897	1.46332	1.62299	1.95109	0.265624	0.943442	0.008	0.0423409	yes
Commd9	chr2:101886261-101901639	WTLV	TGLV	OK	6.93227	6.24035	4.71241	3.97711	7.09264	7.94251	6.49656	6.38703	4.53541	4.91276	4.42657	5.42964	4.15927	5.02818	5.52891	5.44345	6.93196	7.9218	0.192564	0.596808	0.09215	0.256481	no
Ldlrad3	chr2:101950200-102186460	WTLV	TGLV	OK	0.742756	0.953126	0.623259	0.94119	1.0477	0.648511	0.996534	0.998254	0.888486	0.588756	0.816317	1.20733	0.615993	0.965648	0.968618	0.736103	1.21812	1.10497	-0.140645	-0.315761	0.36165	0.6056	no
Trim44	chr2:102300118-102400900	WTLV	TGLV	OK	7.67162	5.6812	6.27029	6.47247	7.71966	7.03704	7.52676	7.14727	5.0772	6.02233	6.1022	5.33112	6.27985	6.56034	5.77994	5.7414	7.64471	8.30552	0.119609	0.622874	0.07765	0.227865	no
LOC108168780	chr2:102300118-102400900	WTLV	TGLV	OK	0	1.83554	0.662253	0.568392	1.85238	0.540092	0.269848	0.859398	0.308408	0.604737	1.77738	0	0.271168	0.517045	1.35523	0	0.775235	0.98755	0.349219	0.121958	0.82395	0.92035	no
Cd44	chr2:102811140-102901669	WTLV	TGLV	OK	4.41172	3.32088	3.69817	4.20099	4.83056	2.72418	3.10806	4.67917	2.23381	1.62023	1.65746	1.56902	1.11543	1.84883	1.94178	1.56568	2.28702	4.73356	1.04945	3.442	5e-05	0.000553274	yes
Pdhx	chr2:103021054-103092649	WTLV	TGLV	OK	31.9347	25.2285	28.8827	31.9705	30.1368	25.6597	28.9364	27.0919	24.5279	26.4043	26.3241	26.6165	27.5164	26.2204	25.0954	27.7051	35.3423	35.5274	0.00753298	0.0406588	0.90695	0.960544	no
Apip	chr2:103021054-103092649	WTLV	TGLV	OK	15.7074	12.3225	11.5382	12.5376	15.3118	14.8054	17.0374	14.6525	18.5354	19.429	15.0572	16.4654	15.5171	19.5868	16.8098	16.2836	22.4422	17.8806	-0.327814	-0.687568	0.0525	0.173325	no
Cat	chr2:103453903-103485153	WTLV	TGLV	OK	59.8331	50.6154	56.8578	59.2683	67.3524	59.9781	65.7924	60.7266	51.2906	56.8801	54.3285	49.0271	57.6435	56.6315	52.4655	57.2672	70.2128	71.5447	0.0271106	0.171583	0.62135	0.805539	no
Abtb2	chr2:103566309-103718423	WTLV	TGLV	OK	3.23085	2.51403	3.3676	2.52902	3.42016	2.43171	2.40134	3.18653	2.7935	2.41846	2.90286	2.71228	3.20309	2.60182	2.9145	2.87601	4.11324	3.68389	-0.159045	-0.568665	0.10595	0.2831	no
Nat10	chr2:103721257-103762643	WTLV	TGLV	OK	1.57579	2.0423	1.95126	1.56786	1.50942	2.04192	2.30473	1.5415	2.22015	1.73955	1.77826	1.75312	1.97194	1.9013	2.08353	2.1922	3.01218	2.68053	-0.168288	-0.597066	0.0896	0.251953	no
Caprin1	chr2:103762944-103830155	WTLV	TGLV	OK	30.8058	24.6695	26.7087	27.6644	30.7428	28.3589	27.5131	27.9769	26.1224	25.432	28.1765	29.7539	28.5454	29.5666	26.5478	25.8874	35.6229	33.4499	-0.0908048	-0.551666	0.11375	0.29749	no
Lmo2	chr2:103957994-103981878	WTLV	TGLV	OK	5.10299	4.70064	4.64097	4.96611	6.0421	5.62873	3.68136	5.47114	5.65839	5.76484	5.04992	4.74908	5.59365	6.6489	5.39258	6.27905	7.40997	6.11859	-0.276268	-0.934515	0.0093	0.0476232	yes
Fbxo3	chr2:103992492-104063237	WTLV	TGLV	OK	16.5275	17.4053	15.552	15.7537	16.6381	15.7711	21.1384	18.7878	18.4452	16.4101	14.497	19.5723	16.0098	18.9934	17.9334	16.0474	22.9141	21.2349	-0.109802	-0.414732	0.24195	0.477881	no
Cd59a	chr2:104095800-104115410	WTLV	TGLV	OK	42.5228	37.0504	33.9277	34.7436	38.9317	35.6361	32.8713	40.4121	27.5002	34.7225	34.0908	34.4607	34.6291	31.8558	33.7471	29.3994	40.2214	41.8763	0.0581703	0.326581	0.3524	0.596613	no
Hipk3	chr2:104426480-104494489	WTLV	TGLV	OK	37.0201	34.8124	33.8628	33.0559	34.5361	35.1498	35.8071	36.3179	32.1185	31.3059	32.6982	33.6939	34.8585	33.6918	33.6562	31.5941	42.8054	42.0808	-0.0246297	-0.161824	0.6513	0.824422	no
Mir1902	chr2:104426480-104494489	WTLV	TGLV	OK	0	0	1.26e-289	9.6337e-315	7.05e-241	1.47e-223	0	1.48e-85	0	1.49e-150	1.53e-156	7.75e-122	1.37e-229	165.23	2.27e-208	9.75e-286	25.8265	0	#NAME?	#NAME?	0.002	0.0139823	yes
Cstf3	chr2:104590483-104665425	WTLV	TGLV	OK	4.90461	2.80158	4.00599	3.39966	6.03408	3.68852	5.38079	5.28739	2.43313	3.38567	4.20816	2.99299	2.95376	4.2379	3.35721	4.46885	4.85231	5.58759	0.203555	0.438526	0.2129	0.443926	no
Qser1	chr2:104754792-104816841	WTLV	TGLV	OK	12.8672	12.4256	11.2506	13.2189	12.193	13.0376	11.9245	11.9635	11.1481	11.7079	10.9339	12.1137	11.7502	11.1672	10.6774	10.4276	14.6201	14.7871	0.0163824	0.0892575	0.80495	0.910301	no
Eif3m	chr2:104886323-105017027	WTLV	TGLV	OK	16.1785	14.156	12.0011	14.1921	14.0043	14.9126	17.7396	16.0092	13.6023	16.0734	17.3039	15.0391	14.9139	17.1766	19.0747	15.3844	35.9862	31.2986	-0.201347	-0.996867	0.00535	0.0309917	yes
Gm38521	chr2:105017117-105017906	WTLV	TGLV	OK	6.3737	1.97287	1.86848	8.0183	5.47516	7.61908	3.0454	10.2376	1.16019	2.27494	4.4575	6.23197	2.55024	1.94505	0	4.21139	6.17877	7.09646	0.199781	0.244938	0.4834	0.712554	no
Wt1	chr2:105126528-105173614	WTLV	TGLV	OK	0.92438	0.900252	0.634505	0.99839	0.654972	0.991804	0.861806	0.777646	1.08345	0.651824	1.04067	0.745506	0.281457	0.639868	0.346252	0.580986	1.01368	1.13363	0.161353	0.360891	0.3092	0.554339	no
Rcn1	chr2:105385947-105399319	WTLV	TGLV	OK	4.12217	3.91244	3.84562	3.80484	4.75934	3.8332	4.04802	3.78902	4.5021	3.41409	4.18097	3.66815	3.95847	4.75383	4.74365	3.65669	5.56101	5.03626	-0.142993	-0.575436	0.1018	0.275685	no
Elp4	chr2:105476203-105904564	WTLV	TGLV	OK	1.27349	1.11716	1.29023	1.12303	1.25211	0.891789	0.940629	1.29106	0.890439	1.1711	1.18904	1.21693	1.17284	1.0741	1.08796	1.26135	1.53103	1.47819	-0.050671	-0.176379	0.6226	0.806476	no
Immp1l	chr2:105904637-105965558	WTLV	TGLV	OK	8.35251	6.91221	6.6987	7.83995	7.01617	7.1599	7.77499	7.37573	7.79889	7.83153	5.49334	6.5088	7.18965	7.01285	6.10636	6.86286	16.8694	16.0394	-0.0727824	-0.274828	0.43025	0.670014	no
Dnajc24	chr2:105966707-106003549	WTLV	TGLV	OK	3.56594	2.55193	2.6087	2.30483	2.14615	2.44035	2.56361	2.0056	1.85801	2.03456	1.67376	1.8146	2.69972	1.43767	2.82625	2.01036	3.00527	3.22782	0.103066	0.22905	0.51285	0.735673	no
BB218582	chr2:106642916-106650364	WTLV	TGLV	OK	1.58573	1.17801	0.743783	0.797958	1.18881	1.21317	2.04572	1.84996	1.21232	1.61307	0.582223	1.35314	1.75117	1.66951	1.97869	1.41448	2.06212	1.84552	-0.160104	-0.269953	0.44865	0.685661	no
Mpped2	chr2:106693458-106868360	WTLV	TGLV	OK	3.5153	3.09187	3.45691	2.41436	3.56557	3.31015	3.10356	3.98753	3.64231	3.88603	2.99878	2.60761	3.66272	3.29825	4.23017	3.22023	4.62235	3.99957	-0.20878	-0.704995	0.04225	0.149009	no
Arl14ep	chr2:106962528-106974448	WTLV	TGLV	OK	1.95094	1.97722	2.17701	1.5867	1.69065	1.13652	1.46601	1.78762	1.32886	1.6847	1.72958	1.36551	1.18179	1.59693	1.63099	1.53857	2.16833	2.16641	-0.00127673	-0.0038519	0.9913	0.996467	no
Mettl15	chr2:109092296-109341749	WTLV	TGLV	OK	2.89708	3.30915	1.81757	1.92279	2.80605	2.76447	2.82251	3.08942	2.36981	1.9003	1.74129	1.92834	2.40341	1.75108	1.28879	1.90914	2.70583	3.29792	0.285485	0.672211	0.05395	0.176438	no
Bdnf	chr2:109674699-109727043	WTLV	TGLV	OK	0.827152	0.699283	0.763167	0.707703	0.74259	0.442101	0.623108	0.486145	1.12155	0.934884	0.809051	1.36917	1.36791	1.0674	1.16699	0.644586	1.39042	0.80503	-0.788406	-1.83539	5e-05	0.000553274	yes
Lin7c	chr2:109890877-109900937	WTLV	TGLV	OK	6.04368	5.73517	5.28122	5.19929	6.34639	5.62132	5.93366	5.66076	5.56992	5.56722	6.16636	5.24551	5.86728	5.51787	6.08714	6.03923	7.44985	6.83191	-0.124923	-0.594303	0.08965	0.251953	no
Lgr4	chr2:109917646-110014257	WTLV	TGLV	OK	5.01605	3.06998	4.23057	3.40151	4.80118	4.34801	3.79371	4.14979	3.25186	3.20254	3.31339	3.24742	4.10849	3.76955	3.65607	3.57575	4.75135	5.09244	0.100019	0.457076	0.19275	0.419511	no
Ccdc34	chr2:110017498-110174555	WTLV	TGLV	OK	3.43684	2.70055	1.77436	2.36848	2.53754	1.79116	2.45022	3.38093	2.16363	1.89581	2.22149	2.17346	1.98674	1.82993	2.03452	2.16466	2.89224	3.18679	0.139916	0.393372	0.2595	0.499288	no
Fibin	chr2:110264055-110386879	WTLV	TGLV	OK	1.11685	1.13433	0.777596	0.948393	2.71466	1.03468	1.83438	1.45166	0.762365	1.12115	1.46452	0.856237	0.837887	1.31005	1.23951	0.933969	1.36866	1.61965	0.242919	0.515968	0.14615	0.349395	no
Nop10	chr2:112261925-112262898	WTLV	TGLV	OK	21.9514	21.5134	19.3233	18.3594	20.0012	14.247	21.1514	20.0482	18.5953	16.9289	20.9867	23.9983	24.5833	26.3873	19.6694	20.0087	27.1574	23.583	-0.203601	-0.791113	0.02285	0.095073	no
Slc12a6	chr2:112266041-112368027	WTLV	TGLV	OK	6.22419	5.07815	5.56145	5.1829	5.91867	4.99457	5.41997	5.54253	4.64372	4.49931	5.16241	4.15909	5.01887	4.79622	4.91725	4.88393	6.23812	6.54337	0.0689224	0.30295	0.38425	0.626754	no
Emc4	chr2:112266041-112368027	WTLV	TGLV	OK	13.2986	11.9265	11.4178	10.9401	14.4306	12.8863	14.841	12.1157	12.4346	13.6735	11.0335	12.01	12.0301	13.0827	10.6305	10.0135	20.3915	20.5272	0.0095662	0.0244642	0.94545	0.9762	no
Katnbl1	chr2:112379210-112414237	WTLV	TGLV	OK	1.35651	0.671802	0.848375	0.819005	1.10196	1.03762	1.44465	1.28466	1.58051	0.806741	1.61339	0.964764	1.69952	0.911065	0.868024	1.1657	1.70391	1.48259	-0.200724	-0.286763	0.41285	0.653675	no
Emc7	chr2:112455013-112469204	WTLV	TGLV	OK	19.7842	10.8226	13.8473	12.5817	14.9188	13.4872	15.2534	15.4143	12.0711	12.3251	14.03	14.3266	12.1247	13.4967	13.0447	14.3742	17.1499	17.2947	0.0121281	0.0474943	0.89395	0.954725	no
Aven	chr2:112478732-112631253	WTLV	TGLV	OK	6.25463	4.58663	5.28587	4.64997	4.3194	4.10792	5.26098	5.57916	5.49804	4.02323	4.05645	4.20342	4.28067	4.9297	4.21494	4.69014	6.16596	6.35163	0.0428027	0.12926	0.70705	0.858817	no
Actc1	chr2:114047281-114052875	WTLV	TGLV	OK	3624.46	2988.03	2977.16	3207.28	3556.16	2993.24	3582.5	3208.51	2854.48	2882.16	3296.61	3127.72	3185.36	3084.34	3112.93	3079.88	3959.74	3879.56	-0.0295132	-0.166256	0.63535	0.814975	no
C130080G10Rik	chr2:114054395-114061505	WTLV	TGLV	OK	88.5177	70.0094	69.3674	65.7982	82.2063	72.5005	83.7072	84.2763	52.9693	53.6283	53.7409	65.9762	60.1549	58.9922	64.7078	57.319	75.0808	91.3898	0.283589	1.76293	5e-05	0.000553274	yes
LOC108168784	chr2:114054395-114061505	WTLV	TGLV	OK	2.23557	1.35735	0.504128	0.173071	0.24173	0.740045	1.06817	0.610589	0.0939082	0.736554	0.631399	0.458571	0.165138	0.314873	0.907847	0.255659	0.57187	1.02348	0.839718	0.320585	0.4873	0.71597	no
Aqr	chr2:114101160-114175339	WTLV	TGLV	OK	3.98813	3.9327	3.46246	3.88161	4.65929	3.65452	4.09907	4.12491	3.76278	3.32722	3.61677	4.18747	4.0003	4.61216	3.19731	3.39885	5.47868	5.23547	-0.0655088	-0.299432	0.4051	0.6464	no
Zfp770	chr2:114193455-114201432	WTLV	TGLV	OK	4.94163	3.382	4.02615	4.24833	4.51061	3.03663	4.20639	3.79566	2.93433	2.95493	4.05628	3.31995	3.68529	3.8835	3.81981	3.92773	4.58769	4.76318	0.0541584	0.232221	0.5088	0.73326	no
Dph6	chr2:114516415-114655054	WTLV	TGLV	OK	1.56835	1.09082	1.48433	1.32128	1.67154	2.47295	2.28775	1.48006	2.34415	2.60399	1.78405	1.94403	2.01309	2.91876	2.18596	2.46221	3.2787	2.26832	-0.5315	-1.17547	0.0017	0.0122692	yes
Meis2	chr2:115861263-116067553	WTLV	TGLV	OK	4.83924	4.36683	4.15706	4.34727	5.53664	5.43137	5.08627	5.05514	4.73988	5.16662	3.97617	5.21101	5.08883	4.9856	4.71545	4.2677	6.46256	6.05698	-0.0935073	-0.387811	0.25895	0.498636	no
Spred1	chr2:117121070-117182279	WTLV	TGLV	OK	4.73118	2.96588	3.59666	4.26564	5.97092	3.9402	4.47599	4.61154	4.29567	3.74385	4.39072	3.54083	3.77674	3.79879	4.65014	5.01175	5.48302	5.20627	-0.0747221	-0.224473	0.5284	0.744455	no
Fam98b	chr2:117249713-117271540	WTLV	TGLV	OK	4.69341	3.20968	3.98786	2.72761	4.1445	4.39512	3.3264	3.30873	2.91708	3.34856	3.27573	3.70779	4.09243	3.99148	3.78928	4.24194	6.38605	5.87545	-0.120224	-0.423458	0.2281	0.462971	no
Thbs1	chr2:118111875-118127133	WTLV	TGLV	OK	2.30893	0.621692	1.93507	1.85891	2.84416	1.9875	2.31656	2.7523	1.00828	0.964081	1.45309	0.824709	1.11955	0.929957	1.27416	1.00681	1.54425	2.68753	0.79938	2.90753	5e-05	0.000553274	yes
Eif2ak4	chr2:118388580-118475234	WTLV	TGLV	OK	1.02419	0.879635	0.92626	1.00768	0.804247	1.12518	0.859885	1.2521	0.624897	0.918928	0.711569	0.708964	1.04757	0.912905	0.852275	0.657233	1.35628	1.39749	0.0431834	0.129477	0.70925	0.859955	no
Srp14	chr2:118475842-118479696	WTLV	TGLV	OK	65.5704	47.6609	54.5958	53.3846	58.902	60.2147	63.9841	50.7746	46.7942	59.1722	56.5172	62.6688	66.3197	58.863	51.34	54.5503	74.1785	68.2611	-0.119939	-0.622066	0.079	0.230739	no
Pak6	chr2:118663027-118698020	WTLV	TGLV	OK	2.36371	2.25989	1.99217	2.18488	2.66735	1.55191	2.1105	1.78172	1.32021	2.01738	1.65183	1.51891	1.59453	1.99329	2.465	1.90226	2.41815	2.68557	0.151321	0.508299	0.1466	0.350117	no
Inafm2	chr2:118745757-118748810	WTLV	TGLV	OK	8.93604	8.93468	7.18224	7.24535	6.31807	9.61661	10.8981	7.48871	4.74254	6.04456	5.84992	4.85114	5.55252	5.44005	3.83894	5.18715	6.67089	9.8986	0.569346	2.55933	5e-05	0.000553274	yes
A430105I19Rik	chr2:118754144-118762953	WTLV	TGLV	OK	8.29351	7.50593	7.29302	7.59995	7.03373	7.55887	7.83241	9.00394	5.74848	6.56866	5.39285	6.59131	6.40539	5.48512	6.22071	6.2134	7.97547	9.4319	0.241978	1.16619	0.0009	0.00713546	yes
Ivd	chr2:118861958-118882907	WTLV	TGLV	OK	42.92	36.4084	39.3983	35.4801	40.9628	42.63	42.8419	39.8336	56.797	62.2794	54.5923	52.2493	60.1653	58.0058	55.2435	53.5752	73.0286	48.1165	-0.601928	-3.51562	5e-05	0.000553274	yes
Bahd1	chr2:118900356-118924528	WTLV	TGLV	OK	1.70155	1.50789	1.44588	1.4414	2.08785	1.96607	2.04898	2.15649	1.46309	1.86552	1.28141	1.8089	1.68547	1.23497	1.68363	1.66034	2.15644	2.27897	0.0797315	0.273015	0.4334	0.673501	no
Chst14	chr2:118926496-118928585	WTLV	TGLV	OK	1.96829	1.28264	0.971814	1.52915	1.74744	1.12278	1.08896	1.57639	1.35771	1.44205	0.833172	0.920826	0.762685	1.07487	1.45839	1.09519	1.43953	1.66688	0.211551	0.460437	0.1941	0.421117	no
LOC102636129	chr2:119008154-119008661	WTLV	TGLV	OK	13.363	9.13292	8.14823	8.28447	10.6192	8.99657	9.70508	11.3872	10.7416	9.50104	9.75672	10.8328	9.34192	7.92756	6.46456	6.56916	0.840144	0.751845	-0.160201	-0.104487	0.7567	0.88542	no
Ccdc32	chr2:119017778-119029406	WTLV	TGLV	OK	2.9661	1.67159	3.09481	2.34161	2.8944	2.04799	2.92771	3.71304	1.79201	1.69062	2.21302	1.85925	1.76912	2.73699	2.10774	3.69007	3.03685	3.37492	0.152278	0.382664	0.27285	0.51517	no
Rpusd2	chr2:119034789-119042198	WTLV	TGLV	OK	0.567943	0.417007	0.851835	0.385492	0.643626	0.846276	0.624775	0.551273	0.67799	0.608141	0.775918	0.901651	0.691249	0.592507	0.754325	0.58908	0.923967	0.739748	-0.320807	-0.801916	0.0231	0.0959108	no
n-TSgct7	chr2:119046749-119046831	WTLV	TGLV	OK	57.5691	80.188	0	115.878	215.796	55.0542	0	0	94.3127	82.1918	0	0	27.6415	0	193.403	114.116	55.9221	72.799	0.380498	3.74952	0.7054	0.857754	no
Rmdn3	chr2:119136997-119157034	WTLV	TGLV	OK	4.54597	3.0584	2.99248	3.43419	3.48842	2.7885	4.62429	3.21114	2.38639	3.42811	3.64462	2.33405	3.15921	3.63574	3.39536	4.30585	4.78548	4.36122	-0.133932	-0.378601	0.2874	0.531528	no
Gchfr	chr2:119167787-119172389	WTLV	TGLV	OK	0.916077	0.141778	0.537104	1.07562	0.858472	0.438029	0.58361	0.154888	0.833758	1.30789	0.640667	2.44284	1.7594	0.698895	2.3448	1.66456	2.14555	0.806245	-1.41206	-1.34351	0.00065	0.0054185	yes
Dnajc17	chr2:119172499-119217050	WTLV	TGLV	OK	2.66284	1.61438	2.65493	1.44354	2.95041	1.54657	2.69078	2.71026	1.14808	1.86156	2.45996	1.36595	2.44597	1.62863	1.32817	3.02624	5.53133	5.28322	-0.0662102	-0.136289	0.6916	0.849093	no
Zfyve19	chr2:119172499-119217050	WTLV	TGLV	OK	3.30048	1.90973	3.1252	1.98257	2.58081	2.42128	2.16504	2.13546	2.03754	2.37822	1.53744	2.55896	2.38913	1.38263	1.51416	3.03434	3.06733	3.28129	0.0972771	0.217007	0.52825	0.744455	no
Vps18	chr2:119288741-119298453	WTLV	TGLV	OK	1.80989	1.58642	1.60661	1.85556	2.23502	1.87641	1.8427	1.83606	1.21927	1.73876	1.79218	1.93052	1.75426	1.48662	1.85088	1.59264	2.23345	2.20892	-0.0159386	-0.0527492	0.88345	0.948909	no
Dll4	chr2:119321198-119335666	WTLV	TGLV	OK	2.75982	2.64022	2.67059	2.79821	2.91007	4.1559	3.54539	3.41097	3.28804	3.35703	3.05711	2.70663	2.59483	2.94677	2.8033	3.39792	4.20938	3.9117	-0.105809	-0.406031	0.24715	0.485154	no
Chac1	chr2:119351241-119354326	WTLV	TGLV	OK	1.47776	0.841057	1.06207	1.87106	0.357378	0.501461	0.774417	1.64421	2.23873	0.816701	1.25019	0.406776	1.05287	0.610988	0.960878	0.708696	1.31431	1.34844	0.03698	0.0655026	0.85105	0.933228	no
Ino80	chr2:119373041-119477629	WTLV	TGLV	OK	2.2773	2.9983	1.95579	2.36725	2.75529	2.59702	2.7075	2.83085	2.13688	1.72869	2.72545	2.09836	2.3922	2.51556	2.29876	2.32065	3.32107	3.38919	0.0292941	0.128355	0.7143	0.862418	no
Chp1	chr2:119547706-119587024	WTLV	TGLV	OK	9.64863	9.09873	9.49496	9.7243	9.37349	9.00589	9.98764	9.49826	7.03023	7.40258	8.22306	7.82403	6.74328	7.10159	6.80554	7.76904	11.9953	14.011	0.224086	1.09051	0.0021	0.0145951	yes
1700020I14Rik	chr2:119594295-119600746	WTLV	TGLV	OK	46.1372	40.3291	41.1472	43.1263	42.0546	42.941	44.5478	44.4184	39.6414	40.3429	44.0496	43.5242	43.7086	42.1982	40.8132	45.2253	55.6478	52.8356	-0.0748156	-0.420114	0.2369	0.472482	no
Ndufaf1	chr2:119655445-119662885	WTLV	TGLV	OK	17.7626	16.9192	16.2764	17.5646	15.9878	16.2763	17.801	15.3592	14.3693	14.8371	15.9674	14.4703	15.8683	17.1024	14.2082	16.1575	19.7986	20.1037	0.0220687	0.100345	0.78165	0.899108	no
Rtf1	chr2:119675067-119735407	WTLV	TGLV	OK	9.09721	8.2714	6.69505	7.92118	7.90938	8.19709	8.53993	9.12509	8.14152	7.09084	7.98086	8.89466	7.92265	7.76708	7.91908	7.84413	10.5869	10.1215	-0.0648648	-0.343262	0.3305	0.575771	no
Rpap1	chr2:119763958-119787537	WTLV	TGLV	OK	2.28334	2.09275	2.58976	1.79545	2.24761	1.68173	1.8181	1.61943	1.67012	1.64064	1.00604	1.63585	1.83482	1.90832	1.43972	1.54527	2.43767	2.70807	0.151765	0.512806	0.144	0.346004	no
Mga	chr2:119871642-119970129	WTLV	TGLV	OK	5.32758	4.28309	5.29512	5.40173	5.51803	5.16549	5.28017	4.94663	4.60355	4.45188	5.00125	4.45675	4.45996	4.79058	5.04867	4.63294	6.14972	6.33695	0.0432693	0.229898	0.51955	0.740185	no
Mapkbp1	chr2:119972386-120027403	WTLV	TGLV	OK	1.08894	1.04478	0.975154	1.09287	1.4777	1.04772	1.04464	1.14181	0.803033	1.03591	0.925832	1.02097	1.1418	1.11025	0.863577	1.0451	1.43347	1.52218	0.0866214	0.301429	0.3913	0.634414	no
Jmjd7	chr2:120027482-120043033	WTLV	TGLV	OK	1.43463	1.7421	1.16463	0.88837	1.49952	1.74132	1.42366	1.51138	0.602551	1.00444	1.33132	0.765094	0.847791	0.745657	1.21816	0.49191	1.32124	1.92143	0.540294	0.809038	0.02605	0.104776	no
Ehd4	chr2:120089486-120154575	WTLV	TGLV	OK	68.2665	65.8809	65.2975	69.8374	73.4107	64.0322	64.1312	68.2784	61.4878	65.3219	60.8195	58.0043	61.9269	61.8616	63.8176	62.9667	79.7235	79.9189	0.00353183	0.0230236	0.9493	0.977462	no
Pla2g4e	chr2:120166411-120245627	WTLV	TGLV	OK	0.548676	0.90578	0.446793	0.460166	0.698198	0.756739	0.626274	0.494766	0.432788	0.538552	0.559594	0.66653	0.643974	0.613942	0.658283	0.664648	0.92559	0.831541	-0.154586	-0.365436	0.28295	0.526364	no
Vps39	chr2:120316460-120353146	WTLV	TGLV	OK	3.99327	4.08513	3.72483	3.84475	4.49025	4.35049	4.30909	3.27862	3.72932	3.7239	3.69732	3.68977	3.2567	3.75069	3.28899	4.14415	5.10824	4.93516	-0.0497303	-0.211894	0.5495	0.759173	no
Tmem87a	chr2:120355308-120504919	WTLV	TGLV	OK	6.84454	7.7536	8.18395	4.91252	8.73301	7.60018	5.11705	6.91071	6.34009	8.25212	7.12855	7.98436	6.49882	8.64943	6.43977	8.54581	4.80758	4.49017	-0.098543	-0.18996	0.58655	0.784499	no
Ganc	chr2:120355308-120504919	WTLV	TGLV	OK	1.90549	2.09338	1.41526	1.68911	1.65887	1.56527	1.55349	1.1406	1.83462	1.9474	1.68724	1.57446	1.99476	1.33898	1.4986	1.68779	3.13728	2.75163	-0.189224	-0.540165	0.12365	0.314144	no
Zfp106	chr2:120506829-120563853	WTLV	TGLV	OK	87.4622	87.1425	83.8983	91.0964	93.3687	90.5827	92.7413	91.4543	92.2461	96.5643	96.9282	96.0019	98.6413	99.6707	94.7282	94.9715	124.626	107.42	-0.214344	-1.4127	5e-05	0.000553274	yes
Snap23	chr2:120567652-120601255	WTLV	TGLV	OK	15.2128	12.2286	11.0771	13.2681	12.8069	13.1863	12.1379	13.537	12.863	15.2883	13.0459	14.0568	13.4605	14.3386	12.3985	13.5576	19.169	17.0712	-0.167208	-0.838877	0.0156	0.071248	no
Lrrc57	chr2:120604237-120621560	WTLV	TGLV	OK	4.71724	5.15771	4.2924	4.43392	6.69839	4.82088	3.91148	3.39009	3.97778	5.82019	4.99792	5.72069	6.97548	8.14552	4.97686	4.27679	7.51393	6.27876	-0.259089	-0.502689	0.15005	0.355628	no
Haus2	chr2:120604237-120621560	WTLV	TGLV	OK	1.9	1.03865	1.20808	1.23111	1.70596	1.75846	1.45522	2.12869	2.09251	1.89858	1.85572	1.191	1.48179	2.04549	1.40239	1.99224	2.37388	1.98129	-0.260809	-0.516935	0.13835	0.337206	no
Stard9	chr2:120629090-120731517	WTLV	TGLV	OK	1.21324	1.38258	1.13136	1.53999	1.23473	1.43624	1.32722	1.20483	0.982676	1.03363	1.03686	1.20811	1.08694	1.19814	1.25926	0.996576	1.42605	1.55858	0.128203	0.505638	0.15275	0.360008	no
Cdan1	chr2:120629090-120731517	WTLV	TGLV	OK	0.914953	0.908402	0.729159	0.778416	0.761101	0.921037	0.671286	0.742151	0.492159	0.55298	0.837858	0.618299	0.824492	0.709656	0.861387	0.768786	1.08309	1.1268	0.0570802	0.117789	0.73735	0.876242	no
Ttbk2	chr2:120732815-120850584	WTLV	TGLV	OK	1.71095	1.68796	1.75075	1.49775	1.82332	1.57662	1.57186	2.07838	1.41095	1.33795	1.10484	1.43131	1.24832	1.45185	1.37132	1.11623	1.80736	2.13803	0.242397	1.07412	0.0023	0.0156721	yes
Ubr1	chr2:120850655-120970728	WTLV	TGLV	OK	5.35433	5.01804	3.70548	4.61727	4.70528	4.11018	4.3641	4.40825	4.5189	5.12101	4.70895	3.91551	4.43521	5.8721	4.57699	4.27076	6.76576	5.84818	-0.210263	-0.799725	0.02475	0.100989	no
Tmem62	chr2:120976477-121007843	WTLV	TGLV	OK	0.0733472	0.158927	0.344235	0.565951	0.412417	0.678062	0.443922	0.397369	0.560763	0.209839	0.520061	0.573741	0.516529	0.42529	0.657104	0.654274	0.838081	0.560742	-0.579754	-1.02556	0.00415	0.025123	yes
Ccndbp1	chr2:121008381-121016912	WTLV	TGLV	OK	7.99098	5.73612	5.94255	6.75047	6.01443	6.01679	5.31839	5.77577	6.30752	6.93226	4.84455	5.49864	6.13415	5.92246	5.85166	4.05495	7.88769	7.8152	-0.0133208	-0.0475701	0.8912	0.953855	no
Lcmt2	chr2:121137291-121156680	WTLV	TGLV	OK	1.90548	1.35882	1.61982	1.66679	1.61919	2.00144	1.61714	2.06622	1.53435	1.42031	1.37695	1.70679	1.52854	1.27015	1.36236	2.00364	1.89952	1.96617	0.0497547	0.111736	0.7574	0.88583	no
Adal	chr2:121137291-121156680	WTLV	TGLV	OK	2.50352	2.23335	2.56705	2.69926	1.91873	2.35618	2.54184	3.79655	1.94385	1.61393	2.2022	2.4175	2.556	2.39535	2.52375	1.73348	3.44992	3.56438	0.0470892	0.123836	0.7207	0.866907	no
Zscan29	chr2:121158272-121171125	WTLV	TGLV	OK	1.76742	1.83085	1.70213	1.80018	1.43849	1.40121	1.74984	1.86905	0.861981	1.00286	0.985763	1.17071	0.95517	0.873438	0.744488	1.41762	1.34934	2.06284	0.612379	1.49257	5e-05	0.000553274	yes
Tubgcp4	chr2:121171167-121355634	WTLV	TGLV	OK	2.97052	2.5407	2.23237	3.69174	2.97701	2.4186	3.58271	3.37547	2.32258	1.82707	2.72887	2.43265	1.90991	2.18871	2.7847	2.27404	3.21238	3.64446	0.182063	0.269705	0.44385	0.680973	no
Trp53bp1	chr2:121171167-121355634	WTLV	TGLV	OK	3.5415	3.78673	3.24639	4.27985	3.74582	3.79109	4.07038	4.40462	3.20943	3.97595	3.01291	3.31129	3.1315	4.18746	3.69386	3.20801	4.68609	4.6979	0.00363245	0.00891256	0.9794	0.991215	no
Map1a	chr2:121171167-121355634	WTLV	TGLV	OK	1.31222	1.45539	1.26077	1.40754	1.6329	1.19525	1.04103	1.53999	0.885201	0.757492	0.871889	0.727372	0.745478	0.968558	1.12399	0.821141	1.11094	1.61614	0.540775	0.945295	0.00855	0.0445738	yes
Ppip5k1	chr2:121171167-121355634	WTLV	TGLV	OK	11.012	10.7251	10.236	13.8275	11.3687	10.2856	10.1555	11.8876	9.14464	9.64007	12.7393	10.9807	11.1585	11.6862	9.82544	10.1766	14.294	13.6697	-0.0644242	-0.279828	0.42375	0.663912	no
Catsper2	chr2:121393023-121438687	WTLV	TGLV	OK	0.424378	0.78164	0.924042	0.57323	0.473462	0.828409	0.379338	0.532731	0.470786	0.610142	0.642931	0.907032	0.535638	0.555822	0.893478	0.83779	0.970539	0.808008	-0.264416	-0.175858	0.59425	0.788843	no
Pdia3	chr2:121393023-121438687	WTLV	TGLV	OK	41.6418	28.9147	34.8226	34.6692	37.71	34.0535	36.1457	38.2634	40.6111	36.1858	37.3413	38.438	40.6162	40.5671	38.7018	36.7479	49.8521	42.8134	-0.219591	-1.32044	0.0002	0.00193127	yes
Serf2	chr2:121449197-121456824	WTLV	TGLV	OK	22.0116	18.7876	20.689	22.6805	22.0366	20.9578	22.3728	23.0919	19.0681	18.591	20.0339	19.4052	21.557	19.0493	17.5479	18.9238	40.4759	41.5145	0.0365526	0.207744	0.56275	0.767978	no
Serinc4	chr2:121449197-121456824	WTLV	TGLV	OK	0.435169	0.153182	0.574073	0.602429	5.69e-262	0.260737	0.155945	0.0663367	1.32e-60	0.139008	1.19e-179	0.0769919	0.26118	0.0995999	0.437641	0.0654394	12.6454	13.5695	0.101757	0.224157	0.51925	0.740061	no
Hypk	chr2:121457087-121458440	WTLV	TGLV	OK	84.8207	77.4091	74.7394	66.9214	75.8394	70.879	79.1961	70.911	81.125	74.3265	69.7551	76.1159	76.1572	75.2783	81.8826	76.0303	99.0877	89.425	-0.148027	-0.752693	0.0322	0.123028	no
Mfap1b	chr2:121461665-121474023	WTLV	TGLV	OK	16.6998	13.7101	14.0992	14.9389	15.1423	16.4171	15.2564	14.6234	14.6947	16.084	15.5546	14.6779	16.9124	14.9406	15.6873	16.4684	1.6842	1.81193	0.105465	0.23086	0.50985	0.734147	no
Mfap1a	chr2:121492680-121506656	WTLV	TGLV	OK	11.5039	9.70617	10.0722	10.1275	10.5879	11.0826	10.4212	9.32957	9.82175	11.4186	11.2516	10.6687	12.0105	10.997	11.6322	11.6781	5.06562	4.26051	-0.249712	-0.998635	0.004	0.0243897	yes
Frmd5	chr2:121545528-121807087	WTLV	TGLV	OK	11.0047	8.96246	13.1749	13.3405	12.5744	15.0884	16.0732	11.9497	16.6514	16.4835	18.6558	16.9042	17.7941	14.2337	12.3959	17.2132	21.093	15.2969	-0.463531	-2.68792	5e-05	0.000553274	yes
Casc4	chr2:121866969-121936220	WTLV	TGLV	OK	3.28698	3.14199	2.02815	3.00484	3.63029	3.19297	3.81966	3.13324	2.7781	2.83369	2.80432	2.89217	2.38638	2.81577	3.33753	3.2474	4.00189	3.95692	-0.0163039	-0.0659804	0.85	0.932973	no
Ctdspl2	chr2:121953770-122015326	WTLV	TGLV	OK	2.93347	1.75499	2.7753	2.55802	2.44283	3.65574	2.57427	2.68752	3.10909	2.67355	2.48392	3.28326	2.41992	3.02382	2.85688	2.90431	5.04533	4.50828	-0.162371	-0.435191	0.21585	0.448339	no
Eif3j1	chr2:122028579-122118773	WTLV	TGLV	OK	7.17674	5.73225	5.01088	6.36995	5.62103	6.38167	5.99862	6.84201	6.05913	6.15352	5.61122	5.78401	7.09945	5.5445	5.51606	5.898	15.6688	15.0375	-0.0593243	-0.246996	0.4855	0.714479	no
Spg11	chr2:122028579-122118773	WTLV	TGLV	OK	2.06546	1.8255	1.90011	2.3014	2.27295	1.9166	1.91959	1.97473	1.75412	1.633	1.70345	1.83486	1.92809	1.82406	1.79746	2.13786	2.49812	2.49945	0.000769931	0.00216412	0.9957	0.997943	no
B2m	chr2:122120102-122186189	WTLV	TGLV	OK	197.227	108.041	134.336	181.994	206.333	160.295	138.53	157.846	135.428	193.738	153.845	114.883	131.765	182.109	129.512	116.202	194.601	198.622	0.0295072	0.180247	0.6086	0.797422	no
Rps12-ps10	chr2:122219911-122220418	WTLV	TGLV	OK	10.8879	8.60987	9.63521	8.30014	9.63083	9.51532	10.3347	10.877	9.60406	9.47345	10.0368	10.0536	8.67635	8.1172	8.30046	7.15368	1.60549	1.49868	-0.0993228	-0.0942151	0.7873	0.901516	no
Sord	chr2:122234838-122265337	WTLV	TGLV	OK	27.9235	29.4302	27.6919	23.6874	25.8114	27.1429	28.7728	26.2546	26.3628	27.2203	26.219	26.2368	28.0466	26.0282	26.4985	23.6254	49.4478	47.4269	-0.0602009	-0.360521	0.30275	0.54692	no
Slc28a2	chr2:122426354-122461137	WTLV	TGLV	OK	2.93589	2.32403	2.86286	4.0533	3.21313	3.3688	2.98318	2.97333	3.50295	3.8879	3.78359	4.10683	2.79417	3.77365	3.67493	3.79432	4.02089	3.11953	-0.366188	-1.30222	5e-05	0.000553274	yes
Bambi-ps1	chr2:122466582-122467797	WTLV	TGLV	OK	1.28666	0.537656	0.905256	0.582716	0.482301	0.799794	0.860685	0.783161	0.351312	0.826637	0.404927	0.960692	0.0617782	0.883459	0.432252	0.637615	0.711504	0.946362	0.41152	0.509275	0.1393	0.338631	no
Gatm	chr2:122594472-122611277	WTLV	TGLV	OK	0.544257	0.701941	0.638206	0.760769	1.13341	0.636144	0.5201	0.582803	0.69349	0.58278	0.380632	0.258015	0.842038	0.80277	0.667522	0.239744	0.856318	0.999411	0.222932	0.411734	0.23825	0.474014	no
Spata5l1	chr2:122630624-122636478	WTLV	TGLV	OK	1.49943	0.589079	1.62301	0.928652	1.08088	1.26847	1.15732	1.17009	0.566871	0.555769	1.20997	0.615141	0.719942	1.42553	1.21781	0.457264	1.12206	1.3886	0.307478	0.486075	0.16815	0.382656	no
Slc30a4	chr2:122681232-122702663	WTLV	TGLV	OK	2.15949	1.37881	1.6667	1.90317	2.17639	1.75966	1.81948	1.72859	1.71186	1.6171	1.52761	2.05797	1.74284	1.46465	1.92455	1.58995	2.30797	2.19412	-0.0729833	-0.270437	0.44945	0.685917	no
Bloc1s6	chr2:122738504-122749487	WTLV	TGLV	OK	3.78828	2.63233	2.79901	4.21399	3.93718	3.74929	3.54069	3.43346	3.891	3.73427	2.91929	3.33564	3.57626	3.26887	2.85918	3.66832	4.4815	4.20423	-0.0921415	-0.363681	0.30095	0.5453	no
Sqrdl	chr2:122764927-122809569	WTLV	TGLV	OK	10.8674	9.13598	9.91798	8.61263	9.34351	12.0441	8.08208	13.0045	10.2801	12.1376	9.22389	10.4623	12.2726	12.2019	12.2683	10.6782	14.8484	12.5155	-0.246595	-1.06522	0.00225	0.0154113	yes
Sema6d	chr2:124089917-124667789	WTLV	TGLV	OK	3.8986	3.97324	4.56018	3.81354	4.73979	4.53129	4.3222	5.0863	3.35384	3.86522	3.47263	4.14428	3.95185	4.07676	5.56478	3.92682	5.45344	5.42009	-0.00884979	-0.0425538	0.90285	0.958432	no
Myef2	chr2:125068126-125123660	WTLV	TGLV	OK	1.5914	1.04193	1.71798	1.16139	2.02179	1.38079	1.24375	2.08591	0.998646	0.84045	1.00162	1.35838	1.14451	1.26086	1.50346	0.759037	1.68953	2.02675	0.262546	0.597888	0.0741	0.221346	no
Dut	chr2:125247247-125259049	WTLV	TGLV	OK	4.44558	4.35676	3.99451	4.00918	3.57967	4.05861	2.74933	5.59802	4.92872	4.90876	2.98496	4.65377	4.90704	3.89674	3.88436	3.8542	5.8613	5.25866	-0.156526	-0.575986	0.10525	0.282058	no
Fbn1	chr2:125300593-125506485	WTLV	TGLV	OK	9.22745	6.71266	9.9541	13.0233	12.1319	8.96249	6.79968	11.1511	6.93385	6.20098	7.50929	7.75837	7.99082	6.1075	9.37612	6.84497	10.0897	12.2532	0.28028	1.68342	5e-05	0.000553274	yes
Eid1	chr2:125627438-125724180	WTLV	TGLV	OK	12.6306	9.99754	10.1458	11.4236	11.3415	10.7482	11.9628	11.3458	9.05351	8.96213	8.13949	9.31716	10.1509	10.8501	8.67894	8.8512	11.8775	13.2851	0.16157	0.764309	0.0309	0.119022	no
Secisbp2l	chr2:125736985-125782870	WTLV	TGLV	OK	4.55439	4.89785	4.86911	5.04108	5.16013	4.59444	4.72905	4.68564	4.59323	5.06982	4.52842	4.63674	5.4129	5.02935	4.45803	4.57266	6.40189	5.96226	-0.102638	-0.529448	0.1279	0.320672	no
Cops2	chr2:125830301-125859082	WTLV	TGLV	OK	15.7344	12.4677	13.0675	13.6741	14.3509	12.7704	12.4751	12.5241	11.0971	12.2858	12.5638	12.3172	12.8739	13.751	14.4676	11.9751	17.1903	17.2211	0.00258224	0.0140263	0.96955	0.986734	no
Galk2	chr2:125859108-126152110	WTLV	TGLV	OK	2.16543	2.05547	2.12578	1.51289	3.08157	2.55546	2.18551	2.92574	1.65602	2.1782	1.9699	1.61428	2.06648	2.31583	1.88995	2.15055	2.67787	3.23989	0.274858	0.654657	0.0538	0.176191	no
Dtwd1	chr2:126152130-126165277	WTLV	TGLV	OK	3.48397	2.00152	0.83513	2.30493	1.8386	1.67046	2.34691	2.27179	1.58754	1.93879	2.47867	2.13232	1.36722	2.1498	1.9742	1.07523	2.49079	2.62209	0.0741125	0.158728	0.6437	0.820121	no
Gabpb1	chr2:126628906-126684441	WTLV	TGLV	OK	4.04785	1.25076	1.93468	3.19046	3.05725	2.86128	2.96127	2.64769	2.67153	2.806	2.56054	1.90138	2.64246	2.43801	2.81547	1.76218	3.51808	3.60015	0.0332696	0.0699586	0.83335	0.925953	no
Usp8	chr2:126707200-126759314	WTLV	TGLV	OK	10.9986	9.81758	9.97561	10.9868	11.25	10.4711	10.8885	10.5424	9.1659	8.16148	8.90711	9.30212	10.4255	10.024	9.2512	8.5128	12.4475	13.0825	0.0717877	0.385663	0.27625	0.518528	no
Trpm7	chr2:126791557-126876261	WTLV	TGLV	OK	6.05217	6.40274	6.00607	4.79069	6.66776	5.29139	6.09135	5.96801	4.01073	4.24266	4.38461	4.44377	5.04836	4.83059	5.27585	4.52245	6.36231	7.4459	0.226896	1.17698	0.0012	0.00915794	yes
Sppl2a	chr2:126890390-126933262	WTLV	TGLV	OK	6.48538	4.91388	4.76516	4.99289	6.22083	5.15933	5.23078	6.55298	4.48567	5.13659	5.94925	4.39096	4.76002	5.91602	4.82288	4.60004	6.98026	6.97662	-0.000753684	-0.00336107	0.9919	0.996533	no
Ap4e1	chr2:127008678-127069814	WTLV	TGLV	OK	1.59652	1.40906	1.3546	0.888505	2.23542	2.26127	1.82435	1.28382	1.50146	1.29351	0.787731	1.47714	2.2186	1.50012	1.81224	2.01361	2.29786	2.32194	0.0150375	0.0341494	0.9192	0.966852	no
Blvra	chr2:127070628-127097084	WTLV	TGLV	OK	6.6651	5.02841	6.01984	6.5045	4.89827	4.12798	6.92514	5.98658	5.10856	4.68961	4.59066	3.56127	7.20544	4.6227	5.62259	4.07606	6.74988	7.37584	0.127944	0.388668	0.26735	0.507296	no
Itpripl1	chr2:127138768-127143486	WTLV	TGLV	OK	1.8354	1.12584	1.10147	1.0556	1.75458	1.12445	1.4568	1.35314	1.14455	1.37063	1.1291	1.17593	1.57913	1.13119	1.22437	0.843755	1.57855	1.67377	0.0844983	0.238401	0.4948	0.722218	no
Snrnp200	chr2:127208358-127240462	WTLV	TGLV	OK	12.275	11.3668	9.81393	10.8534	11.313	12.0719	10.8058	12.1904	10.9962	11.0134	11.2303	12.0205	12.2058	12.6338	13.4691	11.7303	16.0462	14.1096	-0.185556	-1.10702	0.0018	0.0128576	yes
Ciao1	chr2:127240937-127247816	WTLV	TGLV	OK	5.96465	5.34924	4.97311	4.95302	5.37705	5.94266	6.30674	6.11994	5.39977	5.65829	5.11516	5.44295	5.40111	5.52297	5.13744	6.02406	7.17156	6.90974	-0.0536565	-0.234793	0.49765	0.723983	no
Tmem127	chr2:127247974-127260764	WTLV	TGLV	OK	4.88783	3.96248	4.3851	4.80991	5.0458	4.52592	4.32983	5.27335	4.50792	4.1538	5.22519	4.91569	4.1126	4.68793	4.14053	3.42954	5.70104	5.55825	-0.0365929	-0.166821	0.63845	0.816369	no
Stard7	chr2:127270201-127298935	WTLV	TGLV	OK	27.192	27.4778	26.8645	22.9716	27.9595	27.8834	26.2215	24.9469	29.4097	28.2037	29.3608	31.7771	31.3191	27.3765	28.1946	27.917	37.7294	31.4829	-0.261123	-1.56395	5e-05	0.000553274	yes
Fahd2a	chr2:127436214-127444565	WTLV	TGLV	OK	7.18294	8.24149	5.14345	7.95022	6.61103	8.57348	8.65318	7.17992	7.49728	5.7925	8.79941	8.60367	8.22569	8.04051	7.27	8.13846	11.3568	9.39652	-0.273364	-0.819595	0.01895	0.0822001	no
Mrps5	chr2:127587425-127603986	WTLV	TGLV	OK	14.7311	12.4759	11.3506	14.9322	12.1443	12.3425	13.2011	14.1393	11.7561	9.51525	11.5416	12.2243	15.3144	10.024	13.9621	10.4325	18.7807	18.0644	-0.0561035	-0.252984	0.4723	0.704256	no
Mal	chr2:127633225-127656695	WTLV	TGLV	OK	4.46513	3.59388	3.55931	4.65547	4.13246	5.02117	3.95631	4.28529	3.39948	4.1148	5.22149	4.10102	3.43063	3.07185	4.6503	4.47772	5.22653	5.01393	-0.0599122	-0.226508	0.51775	0.739134	no
Mall	chr2:127704389-127729897	WTLV	TGLV	OK	1.1814	0.445676	0.822541	1.11468	1.07251	1.12979	0.635041	0.674149	1.08868	1.38361	0.735855	0.590691	0.673601	0.946382	0.885916	1.06113	1.25392	1.08198	-0.212771	-0.396756	0.2609	0.500923	no
Nphp1	chr2:127740731-127788914	WTLV	TGLV	OK	3.39852	3.89033	3.55211	4.02721	5.61028	5.07841	3.28631	4.78018	3.18463	3.60323	2.00017	3.43059	2.26253	3.04573	3.4439	4.00215	4.68286	5.73987	0.293628	0.989119	0.00505	0.0295579	yes
1500011K16Rik	chr2:127791376-127792488	WTLV	TGLV	OK	14.235	12.3241	18.0728	11.9567	16.9507	16.0696	17.7966	10.7492	10.7543	15.0133	12.1261	11.188	17.5753	11.6604	16.8483	13.7903	17.6958	18.2294	0.0428643	0.155022	0.6627	0.831909	no
Bcl2l11	chr2:127838796-128162547	WTLV	TGLV	OK	2.7996	2.38179	2.1232	1.35408	2.04353	2.09233	1.61286	2.78132	1.31129	2.44517	1.83765	1.94979	2.11378	1.72493	2.50117	1.33659	2.55304	2.58322	0.016951	0.0579013	0.8704	0.943199	no
Gm14005	chr2:128298662-128429351	WTLV	TGLV	OK	1.24099	1.82188	1.41247	0.835564	0.797622	0.903282	1.58222	2.14708	1.18561	0.552602	0.895639	1.24857	0.174033	0.787325	0.71394	0.852653	1.49011	1.75656	0.23734	0.227717	0.5155	0.73715	no
Anapc1	chr2:128610082-128687395	WTLV	TGLV	OK	6.67722	6.90353	6.91369	6.5133	5.94684	7.22428	5.85521	7.24225	5.74456	6.60529	5.87674	5.9877	6.62247	6.60485	5.98252	6.81363	8.57807	8.4718	-0.0179845	-0.0838928	0.81075	0.913803	no
Mertk	chr2:128698996-128803162	WTLV	TGLV	OK	1.11535	1.21983	0.733544	1.43723	0.930826	1.32517	1.6329	1.66027	1.31428	0.835388	0.915432	1.18629	1.11677	1.10428	1.06838	1.37542	1.66188	1.72	0.0495955	0.146922	0.6777	0.841629	no
Tmem87b	chr2:128818071-128854261	WTLV	TGLV	OK	2.73796	2.95883	2.82396	2.92816	3.3131	3.1219	3.25975	2.52149	2.19297	3.26211	2.30604	3.38723	2.79238	3.2298	2.47336	2.73925	3.87142	3.71212	-0.0606222	-0.248273	0.4816	0.710566	no
Zc3h8	chr2:128926267-128944084	WTLV	TGLV	OK	1.45942	1.2856	3.07892	2.97887	3.4448	2.87501	2.14513	2.76051	3.33693	2.45369	3.02235	3.00693	3.15025	2.54262	3.52837	2.51298	4.24787	3.37695	-0.331016	-0.909999	0.0103	0.0517802	no
Zc3h6	chr2:128967401-129018563	WTLV	TGLV	OK	2.39114	2.14341	1.68558	1.27976	1.86516	2.14129	1.37365	2.27149	1.60013	1.68719	1.60944	1.37109	1.69891	1.40457	2.26862	1.58907	2.32265	2.46828	0.0877354	0.318562	0.3691	0.61287	no
Ttl	chr2:129065946-129100949	WTLV	TGLV	OK	4.05007	3.17541	3.04498	3.12647	3.09351	3.61782	3.38417	3.575	3.02277	2.99151	3.9487	3.48788	3.38671	3.66239	3.72509	3.31222	4.49339	4.10664	-0.129845	-0.547608	0.1226	0.312342	no
LOC108168793	chr2:129065946-129100949	WTLV	TGLV	OK	1.52592	0.66768	1.8247	0.436728	0.143506	1.40562	0.135948	0.30775	2.43208	0.156179	3.81171	1.13543	5.05e-06	0.2935	0.3073	0.94559	3.79758	3.36187	-0.175817	-0.0907265	0.8309	0.924534	no
Polr1b	chr2:129100992-129128060	WTLV	TGLV	OK	1.34755	1.24671	1.00181	1.39061	1.31004	1.11545	0.961754	1.10901	1.34096	1.27191	1.08783	1.4661	1.51416	1.24276	1.51047	1.26324	1.96019	1.62743	-0.268398	-0.80817	0.02075	0.0880071	no
Chchd5	chr2:129129699-129134112	WTLV	TGLV	OK	1.89407	2.47336	1.66577	1.42968	1.77497	1.75472	1.97969	2.16165	1.48684	2.91544	1.36603	2.58852	2.10305	2.27592	2.21573	2.05324	2.96747	2.55799	-0.214225	-0.474786	0.18045	0.400324	no
Slc20a1	chr2:129198772-129211615	WTLV	TGLV	OK	2.33009	1.81055	2.00078	2.20025	2.83566	2.49047	3.10068	2.42389	1.53875	1.15749	1.70089	1.57556	1.10522	1.62925	1.7805	1.87215	2.20662	3.05824	0.470865	1.32022	0.00015	0.00149861	yes
Sirpa	chr2:129592664-129632228	WTLV	TGLV	OK	5.68438	4.46778	6.08291	6.54161	6.19059	6.55403	5.41629	6.14764	5.08116	5.49942	4.43625	4.54617	4.92342	5.53121	4.82329	4.74106	6.73439	7.40376	0.13671	0.627858	0.07225	0.217065	no
Stk35	chr2:129798368-129832287	WTLV	TGLV	OK	1.14853	1.53004	1.35738	1.41347	1.244	1.06796	1.53816	1.39261	1.17275	1.49645	0.738098	1.25022	1.0316	1.46874	1.23207	1.45103	1.62255	1.63505	0.0110705	0.0367004	0.9186	0.966617	no
Snrpb	chr2:130171635-130179385	WTLV	TGLV	OK	31.3785	25.9967	25.3369	28.4517	26.2809	28.0569	37.0154	30.1571	22.6711	24.1403	25.7671	23.3386	29.4168	25.2282	21.1856	24.5296	33.3634	36.5621	0.132084	0.646173	0.0679	0.207703	no
Nop56	chr2:130274366-130284542	WTLV	TGLV	OK	5.62522	4.70107	5.16989	5.80558	5.34716	5.66635	6.57509	6.18214	4.2003	4.72301	4.93508	3.83386	5.09749	4.59815	4.03347	4.87209	6.24069	6.87807	0.140297	0.154846	0.6617	0.831271	no
Snord57	chr2:130274366-130284542	WTLV	TGLV	OK	525.044	487.556	2462.7	880.694	1312.08	1506.32	2675.94	1775.46	1911.45	937.01	1285.18	2053.47	1680.65	2243.18	2351.84	3816.12	2618.64	1731.11	-0.597122	-0.180062	0.6743	0.839469	no
Idh3b	chr2:130274366-130284542	WTLV	TGLV	OK	297.661	242.095	240.68	233.291	257.542	252.93	284.587	254.396	266.201	291.186	257.357	275.032	287.184	260.961	262.937	255.605	346.363	305.682	-0.180252	-1.16945	0.0009	0.00713546	yes
Cpxm1	chr2:130390774-130397629	WTLV	TGLV	OK	1.26267	1.33612	1.27403	0.975248	1.89873	1.74106	1.48723	2.08523	0.737628	0.408755	1.04735	0.751716	0.986939	0.510782	0.648267	0.640277	1.15465	1.99029	0.785526	1.79547	5e-05	0.000553274	yes
Pced1a	chr2:130417682-130444269	WTLV	TGLV	OK	0.88437	0.807254	0.911525	0.786446	0.766127	0.866641	0.77706	0.722692	0.870308	0.671181	0.684333	1.02877	0.578292	1.01127	1.14793	0.856006	1.16401	1.06896	-0.122891	-0.181681	0.58945	0.785823	no
Vps16	chr2:130417682-130444269	WTLV	TGLV	OK	2.58492	2.00362	1.75778	2.03712	2.39037	3.06674	2.10357	2.42103	2.57339	2.56725	2.16671	1.7598	2.37109	2.44907	2.14317	2.57419	3.55961	3.2495	-0.131499	-0.387935	0.26095	0.500938	no
Ptpra	chr2:130450250-130563749	WTLV	TGLV	OK	8.69282	8.24227	8.7822	7.88022	9.71422	10.0547	8.27768	10.6444	6.93555	7.47498	7.41253	9.19086	8.91405	8.58439	7.29327	7.86149	10.4174	10.7907	0.0508036	0.243122	0.49195	0.720297	no
4930473A02Rik	chr2:130450250-130563749	WTLV	TGLV	OK	2.95e-292	0.389331	0.224611	1.36e-296	0.112144	0	0.0605749	0.300918	3.86e-252	0.271742	0	0.125646	2.34e-211	6.72e-218	0.0603094	0.062582	1.07989	1.28638	0.252429	0.228186	0.51555	0.73715	no
Mrps26	chr2:130563756-130565394	WTLV	TGLV	OK	15.6935	17.6655	13.9779	14.1113	15.3898	13.4088	14.7511	11.9186	12.972	17.493	12.3249	16.2364	15.9762	15.0349	14.2815	13.0893	21.3183	19.8958	-0.099624	-0.404626	0.24915	0.48737	no
Ubox5	chr2:130589995-130630038	WTLV	TGLV	OK	1.10319	0.92172	0.927175	0.933996	0.889116	0.897917	0.930067	0.800359	0.969712	1.00979	0.784832	0.872214	0.984604	0.907251	0.912554	0.906443	1.23571	1.15896	-0.0925173	-0.191094	0.5806	0.780268	no
Fastkd5	chr2:130589995-130630038	WTLV	TGLV	OK	1.75218	1.53363	2.17071	1.92945	1.61544	1.78915	2.3016	1.35969	2.06214	1.90459	1.5973	1.04048	1.44772	2.08244	1.38131	1.6431	2.15919	2.23802	0.0517324	0.133384	0.7036	0.856352	no
Lzts3	chr2:130632764-130642844	WTLV	TGLV	OK	0.995361	0.919781	0.728576	0.816407	0.82517	0.775914	0.645612	0.898197	0.611853	0.498999	0.615612	0.339332	0.646389	0.33183	0.399913	0.605341	0.709305	0.993056	0.485469	1.0879	0.0018	0.0128576	yes
Ddrgk1	chr2:130654034-130664645	WTLV	TGLV	OK	31.4304	28.802	31.775	36.2496	36.6832	37.3937	34.0914	33.6722	29.9274	35.0344	33.4073	35.7269	42.2136	32.7775	38.571	34.9275	46.0097	41.1391	-0.161426	-0.821025	0.02005	0.0858384	no
Itpa	chr2:130664730-130681614	WTLV	TGLV	OK	6.84256	5.37443	6.18866	5.48178	6.28328	7.06533	5.56235	5.38707	5.98538	6.59547	5.57172	6.64329	6.73561	4.82966	5.45677	5.32982	10.0727	9.53537	-0.079087	-0.268816	0.4429	0.680717	no
4930402H24Rik	chr2:130706199-130840788	WTLV	TGLV	OK	7.73007	7.90468	7.33445	8.2352	7.78172	7.28497	6.37203	6.92586	5.96499	5.95945	6.13144	5.37842	6.63998	5.82705	6.62362	6.70831	8.43066	9.37662	0.153423	0.831049	0.01755	0.0776071	no
Gm14057	chr2:130706199-130840788	WTLV	TGLV	OK	5.07067	2.97222	4.44466	3.1535	4.16771	4.31753	4.00849	3.60593	5.53803	4.67196	4.63012	4.43832	5.35462	5.39795	4.93179	5.12581	0.911894	0.937338	0.0397038	0.0328723	0.92485	0.968403	no
A730017L22Rik	chr2:130872540-130906396	WTLV	TGLV	OK	0.273206	0.27845	0.0351622	0.323163	0.309105	0.262864	0.178298	0.314965	0.0695933	0.160542	0.287041	0.287862	0.151175	0.23182	0.205073	0.148598	1.28997	1.5694	0.282877	0.605644	0.08635	0.245537	no
Atrn	chr2:130906446-131030333	WTLV	TGLV	OK	3.56367	3.95115	3.7743	4.13184	3.90046	3.84935	4.48487	3.71151	3.42925	3.0448	3.29405	3.35017	3.27338	3.39601	3.08322	3.02791	4.45454	4.97788	0.160254	0.821178	0.02025	0.0864132	no
Gfra4	chr2:131039631-131043088	WTLV	TGLV	OK	0.675533	0.69215	1.44758	0.48116	1.20537	0.423931	0.966644	1.19989	1.36397	2.28032	1.23977	1.2008	1.10814	1.18566	1.68493	1.33897	1.88491	1.07113	-0.815363	-1.24688	5e-05	0.000553274	yes
Hspa12b	chr2:131127411-131145985	WTLV	TGLV	OK	4.36922	4.41424	2.9401	5.4287	4.88448	4.76063	5.03571	4.14225	5.38545	4.82083	3.50524	3.96616	4.38181	5.16138	4.34664	4.1165	6.09668	5.71092	-0.0943006	-0.374217	0.29085	0.535165	no
1700037H04Rik	chr2:131146314-131160081	WTLV	TGLV	OK	2.47268	1.83873	1.25031	1.95636	2.29367	1.72517	1.67826	1.93976	1.34179	0.998096	1.83697	0.998214	1.51325	1.04295	2.22696	1.61628	2.01416	2.32989	0.210085	0.411851	0.23905	0.474689	no
Spef1	chr2:131170260-131174810	WTLV	TGLV	OK	0.663609	0.645572	1.03755	0.667872	0.97724	0.785719	1.02673	0.544977	0.552208	0.710579	1.02765	0.741546	0.54622	0.347165	0.758296	0.595075	0.973278	1.01806	0.0648932	0.122054	0.73075	0.872902	no
Cenpb	chr2:131177288-131180067	WTLV	TGLV	OK	35.4237	30.3117	28.73	29.4422	35.4709	31.5791	32.6432	33.6531	24.3012	26.2078	25.1718	23.8143	26.6114	24.8149	25.7985	24.9347	32.3956	38.1411	0.235546	1.39271	0.0001	0.00103854	yes
Ap5s1	chr2:131210359-131213514	WTLV	TGLV	OK	5.13246	4.78415	5.42785	4.68896	4.78296	4.344	4.41388	4.70555	3.96833	4.7787	4.19934	5.1402	4.96734	4.1371	4.28544	4.29699	5.77239	5.88419	0.0276761	0.0830501	0.80855	0.912454	no
Mavs	chr2:131234062-131248025	WTLV	TGLV	OK	11.9787	12.1418	12.5373	11.5247	11.8863	9.50637	11.3368	12.3514	8.88259	8.88657	11.1227	10.9796	12.9172	10.0086	9.87724	9.80648	13.5212	14.1366	0.0642103	0.32441	0.3568	0.600283	no
Pank2	chr2:131262009-131352892	WTLV	TGLV	OK	2.36963	1.97667	2.62155	2.53538	2.8851	2.86984	2.46288	2.25379	1.89986	1.74764	1.45774	1.77087	1.62229	2.12332	2.55587	1.88795	2.23441	2.81276	0.332093	1.03051	0.0027	0.0177534	yes
Smox	chr2:131491783-131525183	WTLV	TGLV	OK	4.72322	4.5279	3.34689	5.01724	3.52208	4.75876	4.12236	4.36112	2.98463	4.28463	3.90615	4.1984	3.77015	3.64888	3.63487	3.68241	4.90042	5.18796	0.0822625	0.224327	0.49535	0.722486	no
Prnp	chr2:131909927-131956131	WTLV	TGLV	OK	18.741	13.1113	13.6764	18.631	18.0254	13.725	17.626	15.2568	14.063	14.4536	15.6735	13.7338	13.6848	15.387	15.3158	15.36	21.3906	21.7944	0.0269752	0.140482	0.689	0.848182	no
Prnd	chr2:131909927-131956131	WTLV	TGLV	OK	1.24908	0.844969	0.487822	1.52678	1.38057	1.4869	0.942375	0.423156	1.02232	0.852175	0.596843	0.711436	1.27517	0.943485	1.30817	0.864064	1.29579	1.28317	-0.0141195	-0.0125782	0.97325	0.988034	no
Rassf2	chr2:131992849-132030319	WTLV	TGLV	OK	2.29658	1.39773	1.57024	1.99334	2.31805	2.32455	1.72637	1.58804	1.10755	1.16496	1.14159	1.30434	1.4464	1.25579	1.36975	1.12542	1.72725	2.3468	0.442215	1.46024	5e-05	0.000553274	yes
Slc23a2	chr2:132052495-132220417	WTLV	TGLV	OK	1.55705	1.35712	1.57187	1.76747	1.41038	1.39557	1.20636	1.44051	1.35927	1.41999	1.14247	0.992489	1.30982	1.29876	1.36392	1.07115	1.71331	1.87022	0.12642	0.443504	0.20265	0.431763	no
Tmem230	chr2:132239491-132248413	WTLV	TGLV	OK	1.96733	2.09078	1.92407	2.49099	2.74384	2.2849	1.63404	1.61591	1.68482	2.25472	2.01493	1.82389	2.60924	1.99433	3.01282	1.69899	2.34128	2.24415	-0.0611252	-0.136633	0.68965	0.848399	no
Pcna	chr2:132249285-132253180	WTLV	TGLV	OK	5.14326	3.51768	5.45326	5.08331	5.10846	5.56654	5.17985	4.28035	5.18003	4.18819	5.62164	3.51502	5.61924	5.52637	5.70539	6.37961	8.85009	8.50672	-0.057089	-0.194529	0.5854	0.783869	no
Cds2	chr2:132262623-132312050	WTLV	TGLV	OK	12.2851	10.1082	9.63745	9.1388	10.3189	12.3744	10.9676	12.0411	9.85847	9.323	9.09237	9.24064	10.2606	10.2181	10.9644	9.38889	12.7878	12.9521	0.0184191	0.0860374	0.8026	0.909083	no
Gpcpd1	chr2:132529081-132578258	WTLV	TGLV	OK	35.0263	42.9108	23.9679	42.1358	38.642	34.6803	36.8255	29.4989	29.2359	33.5471	25.2157	24.1718	30.9143	30.3545	22.4703	35.1216	38.0266	42.6875	0.166807	0.914336	0.009	0.046449	yes
1110034G24Rik	chr2:132686875-132751055	WTLV	TGLV	OK	8.48717	12.7008	7.07396	8.61348	6.83662	9.12215	13.7367	6.83196	7.65876	6.91076	8.38742	4.4111	9.56428	6.74194	4.91215	5.63181	9.01839	11.0265	0.290034	0.959633	0.0065	0.0361318	yes
Gm38455	chr2:132686875-132751055	WTLV	TGLV	OK	1.25911	2.57226	2.65762	1.52064	1.41592	1.20411	1.20322	0.510929	1.37516	1.61788	0.792515	0	1.45093	0.691635	0.483426	0.249586	1.14189	1.97082	0.787375	0.483667	0.21715	0.449775	no
Trmt6	chr2:132804206-132816055	WTLV	TGLV	OK	2.12342	1.31735	1.31331	2.2293	1.37608	1.52328	1.65333	1.36341	1.5494	1.43876	1.54043	0.955701	0.932102	1.60552	1.36162	1.1347	1.87866	2.11309	0.169652	0.466584	0.18815	0.411924	no
Mcm8	chr2:132816140-132844197	WTLV	TGLV	OK	0.496774	0.387504	0.358696	0.379974	0.554213	0.437081	0.370269	0.806838	0.712729	0.574492	0.694303	0.750897	0.42897	0.44808	0.489361	0.533053	0.861454	0.692689	-0.314567	-0.601637	0.0694	0.211037	no
Crls1	chr2:132846651-132894010	WTLV	TGLV	OK	7.56048	4.85047	4.10136	5.11979	6.50913	5.38946	5.68903	4.39582	4.35276	5.73279	7.23628	6.25113	6.6008	7.03439	6.14957	6.35473	8.72787	6.86807	-0.345726	-1.08934	0.0025	0.016755	yes
Tmx4	chr2:134594500-134644121	WTLV	TGLV	OK	12.1366	9.08582	7.98915	8.20954	11.1139	9.61732	11.261	10.3588	8.94364	9.3119	8.33737	8.96022	9.02045	9.81117	8.55061	9.92118	11.8506	11.9334	0.0100398	0.0555067	0.87405	0.944099	no
Plcb1	chr2:134786163-135475258	WTLV	TGLV	OK	1.41181	1.34718	1.28465	1.47539	1.62942	1.49578	1.68942	1.21489	1.40793	1.1508	0.93978	0.815057	1.0166	0.862898	1.00869	1.34148	1.63986	1.98636	0.27655	0.999645	0.0048	0.0283471	yes
Plcb4	chr2:135658661-136014602	WTLV	TGLV	OK	19.0639	16.5302	14.1801	22.3697	19.4714	18.3095	19.4434	16.0189	11.4983	11.8063	11.5134	11.8513	12.5392	12.8307	15.3216	12.0183	17.3152	22.6216	0.385657	2.09727	5e-05	0.000553274	yes
Mkks	chr2:136873779-137081351	WTLV	TGLV	OK	7.68633	7.11947	7.14782	6.32463	6.52463	7.12685	6.45362	6.87865	5.84189	6.02851	6.42106	6.92751	5.90011	6.33114	5.68183	7.10808	8.20312	8.28554	0.0144233	0.0624956	0.8566	0.935325	no
Jag1	chr2:137081450-137116520	WTLV	TGLV	OK	2.22658	2.40539	1.90047	2.25271	2.51565	2.26077	2.2899	2.72779	1.81148	1.42152	2.04852	1.90913	1.60264	1.79141	1.79606	2.06618	2.55193	3.03037	0.247906	0.981736	0.00525	0.0305171	yes
Btbd3	chr2:138256583-138287424	WTLV	TGLV	OK	2.42506	2.30793	2.09953	2.5416	2.86817	2.88407	2.71704	3.26956	2.57342	2.97955	2.10762	2.76089	2.87065	3.10501	2.99555	2.40508	3.70465	3.31127	-0.161953	-0.657428	0.06135	0.193265	no
Tasp1	chr2:139833478-140067658	WTLV	TGLV	OK	2.34833	1.13193	1.30991	1.12987	0.912426	1.62239	2.36168	1.57178	1.80223	0.614468	1.72726	1.44498	1.15812	1.50063	0.981775	0.960547	1.93837	2.07691	0.0995949	0.235261	0.45795	0.693521	no
Esf1	chr2:140119880-140170558	WTLV	TGLV	OK	8.87143	6.42128	6.43562	7.88024	7.91743	9.36129	8.30527	8.40127	7.52543	7.08665	8.82786	6.26059	8.1708	7.42767	7.00062	7.80859	10.0713	9.74963	-0.0468308	-0.225118	0.52005	0.740362	no
Ndufaf5	chr2:140170630-140205252	WTLV	TGLV	OK	14.5718	11.992	10.3909	12.9621	11.1223	11.5034	13.7329	9.34886	10.3734	10.8548	12.7419	11.03	13.3486	13.4535	10.1715	16.779	17.1739	15.2747	-0.16907	-0.533947	0.12625	0.318202	no
Macrod2	chr2:140395355-142392966	WTLV	TGLV	OK	0.885977	1.04661	0.451513	0.988441	1.56302	0.979605	1.03493	1.20184	0.938212	1.11889	1.08654	0.929852	0.517684	1.06349	0.766831	0.887927	1.32114	1.32434	0.0034914	0.00604684	0.98635	0.993912	no
Kif16b	chr2:142618339-142901594	WTLV	TGLV	OK	11.251	12.0149	10.3365	11.551	11.6361	11.5746	12.1966	10.6834	9.61117	11.3082	12.2953	12.6243	11.1356	10.8734	12.3431	11.4125	15.2795	14.3012	-0.0954694	-0.549744	0.11665	0.302533	no
Snrpb2	chr2:143063068-143072052	WTLV	TGLV	OK	4.81794	4.15017	5.27793	4.59369	6.00018	5.15309	5.05845	5.56289	5.05429	7.19538	4.42244	4.36144	4.44399	4.26577	5.11132	4.80657	7.83627	7.44435	-0.0740215	-0.236692	0.5096	0.733876	no
Dstn	chr2:143915330-143943324	WTLV	TGLV	OK	52.9905	43.4637	45.6376	42.2785	48.8432	46.8038	48.0103	46.4574	36.2755	32.2298	36.1983	36.308	35.4146	35.0454	38.5787	35.9556	42.0577	50.3639	0.260019	1.49803	5e-05	0.000553274	yes
Gm33804	chr2:143915330-143943324	WTLV	TGLV	OK	1.5648	1.61453	1.0194	0.174984	1.4664	0.665086	1.24612	2.11658	0	0.558519	1.27675	1.29819	0.500887	1.75094	0.500661	1.20626	1.13708	1.44649	0.347225	0.14123	0.7653	0.889849	no
Rrbp1	chr2:143947394-144011296	WTLV	TGLV	OK	32.4627	29.618	30.452	29.2518	32.9246	32.2164	31.033	31.4545	27.5021	26.5123	24.7333	25.2922	29.4734	28.0294	26.7684	25.4573	34.9281	37.2039	0.0910666	0.529096	0.1301	0.324605	no
Banf2os	chr2:144033101-144073979	WTLV	TGLV	OK	2.62517	3.19427	2.12298	3.00645	3.3084	3.98216	4.15225	2.47947	0.889798	0.484651	0.759699	0.869009	1.30393	1.07737	0.95578	1.52522	1.27505	3.78953	1.57146	2.47415	5e-05	0.000553274	yes
Snx5	chr2:144250122-144281232	WTLV	TGLV	OK	14.2387	10.7083	10.7125	11.6444	14.4612	13.1576	12.6552	12.8883	13.8071	13.7056	14.0235	12.1929	9.80121	13.8345	12.0478	11.9574	17.261	15.6758	-0.138971	-0.54073	0.1246	0.315676	no
Snord17	chr2:144250122-144281232	WTLV	TGLV	OK	135.244	174.345	205.234	176.146	317.594	276.931	196.142	319.595	279.778	359.485	242.024	239.299	239.883	196.65	264.211	198.698	324.93	266.497	-0.286012	-0.507748	0.15295	0.360192	no
Mgme1	chr2:144250122-144281232	WTLV	TGLV	OK	5.97309	4.98612	5.48707	3.6251	4.45598	4.90442	4.83432	4.46347	4.54146	5.25881	4.19941	5.18732	4.97763	5.16176	4.44571	5.01386	6.30138	5.9053	-0.093657	-0.211191	0.54705	0.757272	no
Pet117	chr2:144368982-144407675	WTLV	TGLV	OK	14.1375	10.3951	10.889	13.7096	7.08069	9.83537	18.8922	4.58751	14.2861	14.9015	16.0268	12.525	6.64909	12.4265	16.8827	14.0214	18.0629	14.5525	-0.311758	-0.340033	0.33885	0.583189	no
Csrp2bp	chr2:144368982-144407675	WTLV	TGLV	OK	5.01272	5.79136	5.53107	4.9581	4.26509	5.08307	6.0033	5.34278	4.35795	3.75803	4.68532	4.56668	5.12939	3.9297	5.24885	4.0394	5.96074	6.55584	0.137289	0.56499	0.113	0.296249	no
Polr3f	chr2:144527744-144541779	WTLV	TGLV	OK	1.49802	1.39107	1.58288	1.45794	1.89748	1.71595	1.62031	2.23779	2.08557	1.5688	1.65783	2.30023	1.84955	2.06471	2.54395	1.72945	2.66038	2.17781	-0.288756	-0.99046	0.0057	0.0326199	yes
Rbbp9	chr2:144542264-144550859	WTLV	TGLV	OK	3.1948	3.1212	3.82433	3.58374	4.33492	3.50079	3.65723	2.80212	3.0531	2.28062	2.37396	2.5913	2.78031	2.86392	2.84294	2.57272	3.55948	4.3296	0.282569	0.899204	0.011	0.0546259	no
Sec23b	chr2:144555692-144590753	WTLV	TGLV	OK	2.40721	2.67142	2.68579	2.73533	3.52169	2.544	2.30037	3.27601	1.53901	2.26379	1.78581	2.06688	1.69134	3.3869	2.3669	2.15305	3.28431	3.74597	0.189751	0.603949	0.08715	0.24704	no
Gm561	chr2:144594064-144595365	WTLV	TGLV	OK	21.0641	29.2223	24.4026	18.1344	21.4043	13.1057	22.7969	18.0218	17.7392	18.7505	17.0387	17.5954	22.9084	23.0018	16.3209	22.8892	25.1223	25.3456	0.0127663	0.0381795	0.91505	0.964717	no
Dtd1	chr2:144599952-144768747	WTLV	TGLV	OK	5.00366	4.6464	4.24148	4.30773	4.8585	4.15091	6.27941	4.77024	5.92573	6.97162	6.13442	4.24401	5.49965	5.96067	4.86065	6.09446	7.99827	6.10578	-0.389513	-1.2356	0.0004	0.00354693	yes
Rin2	chr2:145771726-145894181	WTLV	TGLV	OK	4.20126	3.01497	3.70435	3.56947	5.18635	3.76232	2.69733	4.05042	3.73767	3.18465	3.28708	3.7752	3.77795	4.15073	4.18335	3.3919	4.98738	4.59791	-0.117302	-0.5183	0.14385	0.345854	no
Naa20	chr2:145901580-145916425	WTLV	TGLV	OK	12.4478	7.88657	10.9874	9.75556	9.97303	10.4999	11.7268	11.4142	13.4404	10.0572	11.8358	11.1667	12.7294	12.6237	11.3752	7.79213	19.2801	16.8072	-0.198034	-0.81589	0.01965	0.0844929	no
Crnkl1	chr2:145917481-145934700	WTLV	TGLV	OK	9.5866	7.79975	8.53613	6.92505	8.37926	9.49339	8.63454	7.2394	7.68628	6.69152	7.94669	7.44459	7.23567	7.46421	6.64332	7.74768	9.99247	10.6268	0.0887992	0.428545	0.21995	0.452824	no
Ralgapa2	chr2:146239875-146512318	WTLV	TGLV	OK	9.90002	9.99872	7.56473	8.73998	9.14925	8.72679	8.19292	8.06262	7.98898	7.72138	7.77396	9.86027	8.86051	7.88574	7.67305	7.52954	11.2418	11.0566	-0.0239619	-0.130432	0.7126	0.862161	no
Kiz	chr2:146855823-146970098	WTLV	TGLV	OK	35.1262	30.7767	26.9595	27.3936	31.7085	30.2292	28.0454	26.2463	28.553	29.1279	32.2901	30.8758	32.1627	30.7264	28.7854	29.7224	39.4643	35.7365	-0.143147	-0.815152	0.0206	0.0875593	no
Xrn2	chr2:147012767-147078002	WTLV	TGLV	OK	6.755	6.84434	6.59536	6.75724	7.30629	7.64432	7.90127	7.69678	7.19783	6.59255	6.49145	6.20399	6.61731	6.73746	6.31374	7.66872	9.68402	9.01561	-0.10318	-0.493062	0.1633	0.375228	no
Thbd	chr2:148404470-148408188	WTLV	TGLV	OK	7.06047	5.16248	6.45389	6.00544	7.3806	7.60268	7.91586	6.4106	5.99086	5.27825	7.42615	5.35673	5.58779	5.29327	6.17225	5.62024	7.51254	7.99396	0.0896091	0.422425	0.22835	0.463002	no
Cd93	chr2:148436650-148443535	WTLV	TGLV	OK	10.5207	8.38531	12.9185	12.0427	13.0159	10.8816	7.76342	12.3366	10.9597	10.4627	10.0888	11.5729	11.0143	10.0581	12.1875	10.9515	14.065	13.0856	-0.104134	-0.609588	0.08475	0.242035	no
LOC108168804	chr2:148520637-148562141	WTLV	TGLV	OK	0	0	0	0.618414	0	0	0	0	0	0.657949	0.644593	4.58797	2.36027	1.95343	0.877736	0.609009	2.3045	0.439227	-2.39141	-1.3432	0.15445	0.362714	no
Nxt1	chr2:148672614-148676026	WTLV	TGLV	OK	3.66824	2.25768	2.7009	1.5454	2.71807	2.69218	1.71194	2.55297	1.72365	1.09614	1.70033	1.00092	1.72032	1.79629	2.45649	1.22597	2.05596	2.93162	0.511887	0.911406	0.01035	0.0519873	no
Gzf1	chr2:148679384-148692949	WTLV	TGLV	OK	6.32824	5.91327	6.30339	5.51842	5.77028	6.15196	7.69109	5.77616	5.50219	4.85654	5.43773	4.36846	7.02846	6.11768	4.73335	4.50089	6.79228	7.35783	0.115385	0.349296	0.3225	0.568109	no
Cst3	chr2:148871721-148875512	WTLV	TGLV	OK	332.11	222.14	271.636	243.076	319.967	292.364	281.506	319.492	251.441	267.785	265.571	278.984	301.535	269.842	265.271	221.652	339.325	336.985	-0.00998286	-0.0639956	0.8531	0.934295	no
Zfp120	chr2:150114406-150136678	WTLV	TGLV	OK	1.92533	1.16535	1.6482	1.42106	1.48321	1.76489	1.94285	1.65676	1.66299	1.58479	1.0901	1.51854	1.82967	1.39132	2.00847	1.27696	2.04453	2.00352	-0.0292337	-0.0944067	0.7834	0.899808	no
3300002I08Rik	chr2:150305744-150363428	WTLV	TGLV	OK	2.67154	1.37001	1.64685	1.41956	1.56071	0.85467	1.30776	1.02177	0.325363	1.3671	1.65848	0.726305	0.976489	1.1422	2.00199	1.31691	1.38496	1.81794	0.392458	0.356674	0.2613	0.501203	no
Zfp442	chr2:150402479-150451501	WTLV	TGLV	OK	0.866905	0.685809	0.949178	0.619796	0.99318	0.803336	0.946007	1.28336	0.979677	0.966061	0.934185	0.819831	1.24319	0.960713	1.04903	0.709873	1.55781	1.35323	-0.203108	-0.716682	0.04195	0.14826	no
Apmap	chr2:150583080-150608558	WTLV	TGLV	OK	6.55278	8.70446	5.99882	6.69157	6.12244	5.21528	8.1618	7.22249	5.28827	6.53469	7.49309	6.62902	6.54567	5.78131	7.41195	7.32943	9.01723	8.76554	-0.0408422	-0.153775	0.6616	0.831234	no
Acss1	chr2:150618110-150668932	WTLV	TGLV	OK	43.2377	45.4086	44.5518	46.4942	44.821	47.0515	46.3665	44.3109	60.1457	60.8602	53.1777	58.4543	61.7929	59.2615	54.3721	55.2273	74.4528	53.8507	-0.46736	-3.00504	5e-05	0.000553274	yes
E130215H24Rik	chr2:150618110-150668932	WTLV	TGLV	OK	0.362547	0.437386	0.322053	3.16e-09	0.256721	0.43707	0.431289	0.369234	0.397452	0.389372	0.0956509	0.196056	0.34823	0.58247	0.174539	0.364688	1.60961	1.34322	-0.261021	-0.118423	0.84155	0.929445	no
Entpd6	chr2:150749036-150771675	WTLV	TGLV	OK	2.17783	1.87418	1.42548	1.13667	1.22228	1.88306	1.2375	1.87287	1.79613	2.62848	1.7713	2.1397	2.06155	1.99076	2.55833	2.30919	3.06829	2.21922	-0.467383	-1.35843	0.0001	0.00103854	yes
Pygb	chr2:150786795-150831748	WTLV	TGLV	OK	89.7511	84.4162	80.1262	81.9865	91.3536	92.4881	88.0193	91.2431	86.1239	92.314	81.2755	84.2933	94.4383	94.7181	91.9102	89.762	116.445	105.249	-0.145839	-0.96847	0.00575	0.0328742	yes
Abhd12	chr2:150832492-150904731	WTLV	TGLV	OK	11.8512	10.636	8.61958	9.32066	10.6078	9.32182	8.60849	9.35958	8.03127	8.81379	9.39703	6.52174	9.28971	7.73335	10.2747	7.85572	11.5272	12.1747	0.0788517	0.332258	0.34165	0.585792	no
Gins1	chr2:150909555-150931280	WTLV	TGLV	OK	1.10462	0.407633	0.259057	0.444685	0.552086	0.352118	0.422232	0.764684	0.562997	1.41143	0.769979	1.41389	1.13679	0.202259	0.92858	0.583897	1.41804	0.832848	-0.767772	-0.876688	0.00715	0.0386728	yes
Ninl	chr2:150934518-151009398	WTLV	TGLV	OK	0.537862	0.465041	0.485017	0.602094	0.733525	0.543976	0.48331	0.666723	0.154047	0.279593	0.251547	0.142093	0.39693	0.20733	0.334099	0.379326	0.427064	0.817115	0.936086	1.67035	5e-05	0.000553274	yes
Nsfl1c	chr2:151494181-151511310	WTLV	TGLV	OK	11.6767	9.05155	10.6728	10.118	11.4919	11.9468	9.72093	10.9144	13.5047	10.947	12.9714	12.4549	11.6455	11.7793	11.4281	9.52618	17.181	14.633	-0.231589	-1.00942	0.00325	0.0205255	yes
Fkbp1a	chr2:151542482-151561691	WTLV	TGLV	OK	28.2704	22.1231	25.7909	25.4919	26.9487	27.725	26.6769	27.6214	24.9903	20.3097	25.7923	24.6017	26.4108	25.9151	22.7238	24.5021	32.9006	33.0084	0.00472004	0.0250321	0.94315	0.975613	no
Tmem74b	chr2:151700945-151744189	WTLV	TGLV	OK	1.27407	0.549857	0.57572	0.68124	0.805476	0.537761	0.564753	0.892004	0.488614	0.429821	0.419892	0.344237	0.713956	0.394206	0.740127	0.55292	0.685494	0.874512	0.351334	0.444399	0.2035	0.432406	no
Psmf1	chr2:151700945-151744189	WTLV	TGLV	OK	2.78946	2.53696	2.49149	1.89348	2.82136	2.74472	2.68593	2.26114	2.36193	2.6752	1.89288	1.85945	2.9539	2.13421	2.01497	2.17207	3.07402	3.22048	0.0671469	0.187689	0.59935	0.791262	no
Fam110a	chr2:151969395-151980219	WTLV	TGLV	OK	0.748492	1.24904	0.645306	0.752933	1.04239	0.930736	1.12201	0.94006	0.506146	0.496236	0.875121	1.03857	0.445535	0.599528	1.14301	0.688384	0.93395	1.10472	0.242263	0.374455	0.2428	0.479	no
Srxn1	chr2:152105523-152111376	WTLV	TGLV	OK	4.56857	2.96734	3.16162	4.89942	5.33406	4.24962	4.38964	4.81192	2.67205	2.75338	2.72367	2.87591	2.99668	2.85693	2.7557	3.56301	3.7539	5.09079	0.439499	1.60615	5e-05	0.000553274	yes
Tcf15	chr2:152143048-152149097	WTLV	TGLV	OK	7.46917	5.28995	8.45456	10.4035	7.50267	8.76172	7.15601	6.42065	6.45647	6.10785	7.56324	5.6017	7.52735	7.16703	8.28974	7.49881	9.08321	9.16154	0.0123874	0.0366243	0.9181	0.966521	no
Csnk2a1	chr2:152226837-152281856	WTLV	TGLV	OK	8.46191	6.75872	7.03476	6.83371	8.30286	7.62201	7.89183	7.49649	7.07964	7.6425	8.08354	8.15243	7.95175	7.53269	7.27265	7.79728	19.6233	17.9073	-0.132016	-0.758782	0.03265	0.124026	no
Tbc1d20	chr2:152293832-152313994	WTLV	TGLV	OK	6.43098	5.55126	6.44442	7.21549	6.37624	6.62427	5.74284	6.65129	4.77343	4.69613	4.81505	4.53649	4.61607	5.44265	4.96854	4.82456	6.64914	7.94458	0.256801	1.03072	0.0033	0.0207637	yes
Rbck1	chr2:152316333-152332643	WTLV	TGLV	OK	6.91671	5.128	6.14228	6.13988	6.56958	5.57085	6.01402	7.07699	5.41513	4.89514	5.07597	5.15142	6.05789	5.30728	6.7868	4.87003	7.35056	7.96613	0.116026	0.472067	0.174	0.391227	no
Sox12	chr2:152393610-152398046	WTLV	TGLV	OK	2.13902	2.18635	2.50826	2.18374	2.45157	2.38406	2.79407	2.3729	2.08407	2.14212	2.58293	1.85482	2.06886	2.47956	1.71342	2.04376	2.72733	2.82643	0.0514948	0.191136	0.57605	0.776649	no
Zcchc3	chr2:152411955-152415044	WTLV	TGLV	OK	1.12846	1.23651	1.37619	1.02214	1.12096	0.971251	1.25092	1.16768	1.50362	0.990836	1.06542	1.29997	1.06198	1.07444	1.16982	0.917122	1.46076	1.38164	-0.0803365	-0.202085	0.5648	0.769525	no
6820408C15Rik	chr2:152415586-152444336	WTLV	TGLV	OK	1.75094	0.916922	1.60505	1.39129	1.28265	1.67139	1.44717	1.0017	0.862747	0.73327	1.59427	1.70227	0.876325	1.20532	1.612	1.35404	1.83797	1.94402	0.0809286	0.137209	0.6742	0.839469	no
Rem1	chr2:152627007-152635191	WTLV	TGLV	OK	1.76748	1.46852	1.14537	1.87246	2.09222	1.64579	1.06676	2.54801	1.37159	1.44434	2.2933	2.13335	1.5633	1.2349	2.14298	1.89008	2.33495	2.14919	-0.119599	-0.26832	0.44895	0.685661	no
H13	chr2:152669435-152708668	WTLV	TGLV	OK	11.9545	8.55228	8.84112	7.86751	12.9503	11.5973	10.9291	11.72	9.1782	9.72707	10.0889	8.05528	10.6063	8.87248	7.95632	8.20578	12.4036	13.9758	0.172169	0.601898	0.0891	0.250824	no
Mcts2	chr2:152669435-152708668	WTLV	TGLV	OK	5.34994	5.67766	6.01738	7.4721	5.93438	5.63829	4.17345	3.76589	3.45812	4.09186	4.29512	3.02795	5.97626	4.99786	5.03037	3.78744	5.55645	6.56479	0.240584	0.340186	0.3344	0.579408	no
Id1	chr2:152736233-152737410	WTLV	TGLV	OK	7.62922	8.76421	7.41295	11.4701	10.8472	11.2947	10.7209	8.49068	9.20044	11.3455	9.43387	9.78223	6.84019	8.55912	9.74288	9.35425	12.1238	11.3934	-0.0896536	-0.298631	0.398	0.640791	no
Cox4i2	chr2:152749974-152834797	WTLV	TGLV	OK	6.45653	3.68956	4.9503	2.87412	4.5379	4.74729	8.42435	7.17971	5.28871	5.05219	4.68911	4.63539	4.53087	6.82038	9.296	4.18408	8.13393	7.43306	-0.129996	-0.193539	0.5762	0.776649	no
Bcl2l1	chr2:152749974-152834797	WTLV	TGLV	OK	4.88042	4.56301	4.10741	6.79143	6.05184	5.14285	8.65946	4.13903	6.54248	5.77417	6.41585	3.84312	4.25593	5.82213	5.46418	3.94169	6.85335	6.65249	-0.0429154	-0.135736	0.69365	0.850631	no
Foxs1	chr2:152931897-152933208	WTLV	TGLV	OK	2.17422	0.163701	0.89578	1.30108	1.26655	0.50576	0.954624	1.13264	0.834322	0.943827	0.739731	1.25358	0.790007	0.753166	1.29728	1.22305	1.25966	1.22938	-0.0351061	-0.0552853	0.87185	0.943917	no
Pdrg1	chr2:153008889-153015383	WTLV	TGLV	OK	52.0972	43.6045	42.7854	49.6218	48.4644	48.8504	55.97	48.1514	54.0574	52.0475	48.3946	54.825	54.5376	56.3513	51.9548	49.1187	67.8991	58.0641	-0.225744	-1.26803	0.0003	0.00278329	yes
Ccm2l	chr2:153065932-153081735	WTLV	TGLV	OK	2.11398	1.59375	1.41053	2.63991	1.94972	2.0216	2.10346	2.5342	0.994405	1.80173	1.44908	2.53228	1.45315	2.07547	1.87171	1.87211	2.51403	2.71615	0.111559	0.245485	0.47885	0.709547	no
Tm9sf4	chr2:153161300-153210466	WTLV	TGLV	OK	6.29695	5.29018	5.14143	5.29641	6.22801	5.39919	6.24557	5.33514	5.12604	5.34648	4.9245	5.69156	5.93878	5.2011	5.8595	5.8405	7.37398	7.02816	-0.0692965	-0.323513	0.35865	0.60194	no
Pofut1	chr2:153241531-153271029	WTLV	TGLV	OK	1.59502	1.17242	1.69563	1.74988	1.72164	1.72755	1.73024	1.95679	1.4904	1.83289	1.21718	1.01674	1.4354	1.50089	1.55768	1.10059	1.87437	2.0202	0.108093	0.385617	0.27865	0.521543	no
Kif3b	chr2:153291408-153333390	WTLV	TGLV	OK	1.99183	1.9499	1.57587	1.94425	2.02401	2.16874	2.00646	2.26785	1.20565	1.60603	1.43496	1.38226	1.14073	1.95536	1.45118	1.58169	2.01819	2.49238	0.304463	1.13679	0.0015	0.0110551	yes
2500004C02Rik	chr2:153341156-153345810	WTLV	TGLV	OK	0.883683	0.907404	0.819149	0.435013	0.86412	0.627964	0.406696	0.362483	1.07004	0.534825	0.611905	0.573745	0.442743	0.356144	0.25815	0.46864	0.821751	0.91431	0.153982	0.249786	0.4746	0.705991	no
Asxl1	chr2:153346138-153404007	WTLV	TGLV	OK	5.32677	4.35034	3.57107	4.23731	3.71749	5.92821	4.748	4.1211	5.42245	4.13496	4.86437	3.60977	3.61335	4.73291	4.20956	3.42575	6.92276	6.50258	-0.0903357	-0.168285	0.6295	0.810797	no
Gm14472	chr2:153407460-153529971	WTLV	TGLV	OK	12.3664	9.92905	10.2284	10.8123	12.4372	11.9001	14.2021	11.8956	14.2237	13.9392	12.44	14.9808	14.7593	14.3237	12.845	13.1977	1.24714	1.5531	0.316529	0.268835	0.43935	0.678203	no
Commd7	chr2:153616929-153632797	WTLV	TGLV	OK	1.76552	1.56381	1.4726	1.33694	1.96574	2.24412	2.3191	1.82876	1.39214	1.51077	1.67793	2.10883	1.32624	1.55487	2.17589	1.34427	2.46735	2.53925	0.0414393	0.110608	0.7554	0.884715	no
Mapre1	chr2:153741286-153773317	WTLV	TGLV	OK	3.37926	3.23219	3.38165	3.28873	3.70113	3.15336	3.76881	4.09677	3.55692	2.76579	3.42468	3.20355	3.21981	3.28272	2.68101	3.68323	4.49289	4.47281	-0.00646324	-0.0316605	0.92775	0.969422	no
Cdk5rap1	chr2:154222010-154372852	WTLV	TGLV	OK	2.83327	3.18288	2.93883	3.20804	1.73878	2.95108	3.1062	3.17807	2.14603	2.8612	2.08154	2.28012	2.08815	2.55963	1.52118	2.5439	3.36876	3.84843	0.192052	0.568162	0.10575	0.282949	no
Snta1	chr2:154376313-154408084	WTLV	TGLV	OK	14.1698	10.4063	11.1837	14.3294	13.8534	13.844	12.1087	12.5779	13.6158	10.5042	11.0056	10.2457	12.3642	13.222	10.5277	11.377	15.2251	15.4895	0.0248416	0.119304	0.7424	0.878888	no
Cbfa2t2	chr2:154436462-154539356	WTLV	TGLV	OK	2.45377	1.75644	2.28105	1.92532	2.39486	2.13912	2.0792	2.421	1.52129	1.78981	2.01911	1.90347	2.2135	1.74504	1.6307	1.69759	2.52805	2.74513	0.118849	0.470726	0.1722	0.38888	no
Pxmp4	chr2:154585757-154603729	WTLV	TGLV	OK	4.67428	2.65291	3.92546	4.13422	3.35042	3.19401	4.73785	3.18146	4.66551	3.64278	4.14803	3.69563	4.24016	4.36181	4.36077	4.95985	5.84843	4.8116	-0.281534	-0.83864	0.01625	0.0735072	no
Chmp4b	chr2:154657025-154694783	WTLV	TGLV	OK	38.8015	34.5657	33.5803	35.2671	33.2735	36.7514	35.66	34.2305	35.281	35.0871	32.4271	35.0013	32.9373	37.3927	32.477	34.8228	44.6692	42.2725	-0.0795596	-0.442654	0.20425	0.433228	no
Raly	chr2:154791096-154871010	WTLV	TGLV	OK	20.5418	16.2316	14.1404	17.4799	19.3461	16.0865	16.5069	15.7712	17.4945	17.458	13.8324	16.5945	16.2377	17.6686	16.7259	16.8851	21.8962	20.7601	-0.0768628	-0.355939	0.3111	0.556648	no
Eif2s2	chr2:154871409-154892906	WTLV	TGLV	OK	12.7442	11.6248	11.1916	10.5276	11.9957	12.8481	12.9599	14.5589	11.0088	12.1367	12.6298	10.9471	11.9945	11.8352	12.9904	10.8286	30.7218	30.3256	-0.0187268	-0.10658	0.7631	0.888893	no
Ahcy	chr2:155059309-155074497	WTLV	TGLV	OK	1.23861	1.00586	1.44425	1.34461	1.1216	1.45511	1.35209	1.12004	0.851178	1.02078	1.11685	0.853559	1.29633	0.900366	0.948434	1.33335	1.65167	1.47433	-0.163864	-0.392975	0.27125	0.512722	no
Itch	chr2:155133375-155226855	WTLV	TGLV	OK	5.86733	4.43625	4.74375	5.90863	5.97629	6.25279	5.60142	7.73631	6.50928	5.12111	5.2077	4.857	5.53917	5.03167	4.97671	4.9238	7.57705	7.54464	-0.00618455	-0.0253334	0.94085	0.975167	no
Dynlrb1	chr2:155236532-155250277	WTLV	TGLV	OK	77.9538	55.7286	53.5067	62.7952	62.09	69.1883	62.73	66.7088	59.677	61.7444	70.7437	49.9462	64.0593	65.5657	60.3664	70.0439	81.9668	76.1919	-0.105401	-0.531242	0.12705	0.319014	no
Map1lc3a	chr2:155276363-155278073	WTLV	TGLV	OK	163.744	135.685	131.814	130.95	131.133	130.345	144.877	130.114	108.585	107.204	102.107	110.254	112.475	101.638	106.042	98.1554	135.552	162.918	0.265299	1.63294	5e-05	0.000553274	yes
Pigu	chr2:155278242-155357424	WTLV	TGLV	OK	4.12385	3.79044	4.34353	3.88228	4.13548	4.21619	5.35724	4.4312	3.15981	3.96091	3.5688	2.8137	3.13495	4.16225	3.35003	3.59602	4.95324	5.67301	0.195742	0.61336	0.0808	0.234261	no
Trp53inp2	chr2:155381806-155389847	WTLV	TGLV	OK	79.6762	68.3852	68.9092	75.2992	74.4955	67.4146	81.7104	72.9066	56.6475	54.7551	57.7233	58.7178	60.5402	56.0749	57.4808	59.7057	74.3782	87.4192	0.233071	1.52645	5e-05	0.000553274	yes
Ncoa6	chr2:155390655-155473894	WTLV	TGLV	OK	4.1554	4.18815	3.836	4.61248	4.56842	3.95534	4.2603	4.18947	3.42997	3.70028	3.39629	3.57438	3.27956	3.52857	3.79715	4.09943	4.80265	5.17802	0.108569	0.502201	0.15195	0.358694	no
Acss2	chr2:155517952-155562746	WTLV	TGLV	OK	4.70058	3.12739	3.1525	4.37688	2.72423	3.14927	3.40114	2.58775	3.7515	2.70488	3.3596	2.85945	3.09699	3.99045	2.58585	3.59698	4.59356	4.37426	-0.0705757	-0.25785	0.4656	0.699198	no
Gss	chr2:155563180-155593188	WTLV	TGLV	OK	2.76217	1.87572	2.94561	2.45714	3.90205	2.30012	2.93972	3.46063	2.88456	2.61587	2.68933	2.77851	2.57153	2.53575	2.63611	2.77717	3.71214	3.49431	-0.0872441	-0.225671	0.52175	0.741088	no
Myh7b	chr2:155611242-155692384	WTLV	TGLV	OK	3.13821	4.0405	2.66126	3.18183	2.39993	3.56757	4.17502	2.63686	7.02239	4.94726	5.71411	5.87822	6.6718	6.34122	5.21818	6.289	8.278	4.11577	-1.00812	-3.09074	5e-05	0.000553274	yes
Trpc4ap	chr2:155611242-155692384	WTLV	TGLV	OK	14.854	14.7426	11.1365	13.5048	13.6346	13.7931	13.2386	12.7743	12.5889	14.5546	14.0538	14.3956	15.1412	14.2759	13.9445	16.662	18.8773	16.5165	-0.192747	-0.767992	0.0296	0.115215	no
Edem2	chr2:155701672-155729475	WTLV	TGLV	OK	1.27763	1.54495	1.84852	1.01453	1.60011	1.80622	1.012	1.21521	1.42326	1.37954	0.798887	0.580893	1.36344	0.966314	0.629631	0.848421	1.46498	1.88754	0.365622	0.672648	0.0584	0.186606	no
BC029722	chr2:155775341-155819203	WTLV	TGLV	OK	8.89691	6.21068	6.12466	5.81737	8.41812	8.52302	5.05598	8.10419	6.84939	6.72168	7.21495	5.99725	7.36768	6.80822	6.13877	6.57765	8.80961	8.49421	-0.052599	-0.184069	0.60705	0.796163	no
Eif6	chr2:155819836-155826925	WTLV	TGLV	OK	5.44305	5.00761	5.02336	4.59037	5.78561	5.03658	3.37131	4.14133	3.41271	4.8839	4.33535	4.99947	3.96857	4.72937	3.5314	4.09598	6.08221	6.26765	0.0433283	0.139832	0.6935	0.850623	no
Uqcc1	chr2:155846885-155930348	WTLV	TGLV	OK	20.2253	17.8527	16.9912	16.4226	19.8902	17.8374	21.722	17.9892	19.9606	21.5899	20.674	22.4419	23.5163	22.5792	22.5592	25.5684	32.5452	25.5336	-0.350046	-1.6926	5e-05	0.000553274	yes
Cep250	chr2:155956269-155998900	WTLV	TGLV	OK	1.38949	1.26716	2.2487	2.34385	1.5136	2.1164	1.28026	1.93055	1.24441	1.55528	1.50886	1.10818	1.58055	1.66208	1.85071	1.09203	2.02175	2.25604	0.158182	0.502369	0.1509	0.357142	no
Ergic3	chr2:156008032-156018279	WTLV	TGLV	OK	11.099	7.9685	10.5768	9.4171	11.5651	11.0226	11.4862	9.77677	10.4388	8.12867	10.9309	9.99801	6.46707	8.88022	9.2548	8.01517	13.5601	14.3222	0.0788828	0.318492	0.36985	0.613509	no
Cpne1	chr2:156071840-156111965	WTLV	TGLV	OK	4.079	2.96138	3.09806	3.43021	3.02124	4.07946	3.26849	3.59916	2.8561	2.13425	3.13099	2.89139	2.25855	2.1045	2.23816	2.7769	3.57862	4.28524	0.259972	0.76593	0.0295	0.114939	no
Rbm12	chr2:156071840-156111965	WTLV	TGLV	OK	2.08082	2.18419	2.50622	1.90261	2.15649	2.68522	2.16762	2.93102	1.89732	2.42097	2.25876	1.936	1.90494	2.6402	2.29348	2.10051	2.80426	2.78401	-0.0104528	-0.0262201	0.9411	0.975167	no
Nfs1	chr2:156123636-156145794	WTLV	TGLV	OK	14.7223	12.1849	11.5998	11.1467	12.5738	12.0499	14.9913	11.6776	12.8971	14.3995	13.1416	11.7532	14.5025	12.2794	15.0704	13.0761	18.0957	15.2487	-0.246962	-0.928821	0.00965	0.0491601	yes
Romo1	chr2:156123636-156145794	WTLV	TGLV	OK	86.2334	85.4949	67.3071	72.236	56.081	80.5852	73.1748	82.3905	64.1151	74.4412	65.0795	75.0505	80.681	71.1125	79.0448	53.6625	99.9819	100.866	0.0126953	0.0440899	0.89785	0.956558	no
Rbm39	chr2:156147238-156180238	WTLV	TGLV	OK	33.5516	31.4631	26.3802	28.0984	33.3919	40.3613	38.7529	29.2802	29.9625	28.8604	32.5761	31.2964	34.0606	29.0214	29.4757	27.3221	40.9242	39.8063	-0.039956	-0.218851	0.5343	0.747868	no
Phf20	chr2:156196646-156309953	WTLV	TGLV	OK	1.87095	2.31904	2.65969	2.11846	2.5033	2.65488	2.26548	2.58118	2.19063	2.04691	2.40092	2.18982	2.17724	2.17131	2.38962	2.34576	3.48459	3.48081	-0.00156551	-0.00666658	0.98455	0.993452	no
Scand1	chr2:156311845-156375638	WTLV	TGLV	OK	28.9231	25.3092	23.0787	24.7344	26.6016	25.3542	25.3657	27.7306	21.179	22.6405	23.2253	20.6212	24.5113	21.7102	20.3436	18.5248	27.6018	30.6521	0.151225	0.523528	0.1393	0.338631	no
Cnbd2	chr2:156311845-156375638	WTLV	TGLV	OK	7.08011	5.4916	7.9758	5.98534	6.7652	7.2832	6.80925	8.08494	7.0464	7.14473	5.8834	6.29726	7.14468	5.95508	6.13827	5.85731	4.84755	5.03708	0.0553308	0.108302	0.7617	0.888458	no
Gm39972	chr2:156311845-156375638	WTLV	TGLV	OK	1.53158	0.871615	1.57014	1.56784	1.59243	1.37191	1.46663	1.59082	1.12272	1.49129	1.06587	1.22151	1.68872	1.60768	1.23917	1.07961	1.04937	1.09461	0.060901	0.0675033	0.85075	0.933017	no
2900097C17Rik	chr2:156378144-156401480	WTLV	TGLV	OK	28.63	25.0877	25.3188	25.3475	29.4481	26.7758	29.3031	27.9413	25.4054	25.9067	25.6754	24.9593	26.6117	26.445	26.624	25.9372	36.5415	35.515	-0.0411044	-0.260627	0.4662	0.699805	no
Epb41l1	chr2:156420877-156543214	WTLV	TGLV	OK	1.08202	0.94527	1.25375	1.15785	1.54865	1.18881	1.23803	1.64905	1.28633	1.06255	1.04277	0.913975	0.864581	0.921097	1.27151	1.09214	1.53018	1.6845	0.138613	0.459735	0.16985	0.385191	no
Aar2	chr2:156547558-156568972	WTLV	TGLV	OK	3.05946	2.50791	2.58548	2.32042	2.44314	2.47869	3.07955	2.61784	3.46299	3.18129	2.44677	2.43373	2.40656	2.33655	3.16855	3.24563	3.70914	3.17504	-0.224309	-0.751332	0.0327	0.124136	no
Dlgap4	chr2:156613632-156764363	WTLV	TGLV	OK	7.08204	5.12628	5.99489	5.91275	7.05614	6.47667	7.01901	5.94629	7.26263	6.65977	6.55291	6.52886	7.09257	6.45784	5.5835	7.19794	9.81206	8.30343	-0.240848	-1.00893	0.00425	0.0256104	yes
Myl9	chr2:156775412-156781657	WTLV	TGLV	OK	11.2172	10.7516	9.01849	12.0314	17.4899	13.0269	10.5499	15.7798	9.45567	8.5975	8.13069	10.8579	11.3871	11.8239	10.892	8.55901	13.0803	15.5124	0.246029	0.933022	0.00825	0.043373	yes
1110008F13Rik	chr2:156863121-156887241	WTLV	TGLV	OK	23.0293	15.8962	21.4236	19.9024	23.4515	23.5422	18.3392	20.4152	14.2527	15.5932	18.4244	18.5869	17.1758	18.6237	20.7048	15.4447	13.5464	14.5877	0.106837	0.317715	0.36765	0.611406	no
Sla2	chr2:156863121-156887241	WTLV	TGLV	OK	0.0506494	4.63e-08	6.59e-08	0.0537655	9.97e-08	0.0353558	4.39e-08	0.0871172	2.52e-08	0.0392014	0.154324	1.69e-07	6.83e-08	7.34e-08	5.13e-08	3.64e-08	3.3424	3.83439	0.198111	0.469411	0.1765	0.394822	no
Ndrg3	chr2:156927341-156992111	WTLV	TGLV	OK	3.89785	2.89894	2.59692	3.42651	4.10075	4.2358	3.72272	4.3216	2.76845	3.13814	3.20495	2.33378	2.76982	3.8587	3.51429	3.2296	4.78628	4.84965	0.018978	0.0698065	0.83865	0.928267	no
Soga1	chr2:157010440-157096948	WTLV	TGLV	OK	2.18534	1.75434	2.13104	2.53888	2.17505	2.32871	1.96914	2.43989	2.02398	1.90186	2.15087	1.89102	2.09761	1.97892	2.13718	2.2841	2.7272	2.66683	-0.0322967	-0.160227	0.6489	0.823097	no
Samhd1	chr2:157097528-157135277	WTLV	TGLV	OK	5.66355	4.80027	4.14813	6.11916	5.46907	4.05747	5.35073	5.34483	4.13177	6.00194	5.20335	4.98057	4.64344	4.87716	4.70725	5.59354	6.75674	6.34122	-0.0915667	-0.404429	0.24845	0.486414	no
Rbl1	chr2:157145892-157204534	WTLV	TGLV	OK	0.800444	0.444128	0.863536	0.812221	0.495569	0.61328	0.763379	0.654935	0.502062	0.944793	0.437959	0.545887	0.494469	0.420469	0.761452	0.678349	0.933845	0.970668	0.0557945	0.102739	0.76545	0.889878	no
Rpn2	chr2:157208547-157326318	WTLV	TGLV	OK	13.9496	11.8113	13.2499	13.4827	15.2416	13.5915	15.5957	14.3402	12.6798	14.0592	12.2049	11.2185	13.2031	15.2477	12.075	12.218	17.3242	17.7402	0.0342304	0.175141	0.6212	0.805539	no
Manbal	chr2:157367593-157396763	WTLV	TGLV	OK	3.38459	3.14294	3.37774	4.1446	3.84661	2.07266	2.6235	3.51804	2.20927	3.1615	3.32394	4.53193	1.87312	3.10871	4.36893	2.85493	4.18096	4.00434	-0.0622716	-0.150085	0.6621	0.83142	no
Blcap	chr2:157556361-157566460	WTLV	TGLV	OK	7.13023	5.23569	6.02158	5.0983	5.39752	4.74134	5.68641	6.54698	6.04424	4.21684	5.62357	5.79262	5.96412	5.74952	5.42857	5.2949	7.14326	6.73509	-0.0848834	-0.316249	0.3695	0.61319	no
Ctnnbl1	chr2:157737400-157891903	WTLV	TGLV	OK	2.62801	1.96414	2.20554	2.4115	2.4869	2.5871	3.3083	3.13839	2.40471	2.67616	2.81933	2.52682	3.04319	3.29696	3.17038	2.49402	4.31773	3.64091	-0.245976	-0.626159	0.07535	0.223443	no
Tti1	chr2:157981802-158028476	WTLV	TGLV	OK	3.76613	3.03328	3.15599	3.65644	3.36937	3.19399	4.01097	3.79472	3.55045	3.86128	3.77209	3.81563	3.94072	3.49387	3.94549	3.58165	4.90304	4.30024	-0.18926	-0.764465	0.03045	0.11771	no
Rprd1b	chr2:158028488-158091797	WTLV	TGLV	OK	5.98391	5.696	5.62164	5.45953	5.74763	4.95075	5.70933	6.57142	4.70055	4.81873	5.06163	5.08962	6.18316	5.88133	6.29282	4.63221	7.23332	7.09237	-0.02839	-0.125809	0.7238	0.868957	no
Tgm2	chr2:158116404-158146392	WTLV	TGLV	OK	20.1291	16.2514	16.8011	24.9213	23.4971	19.9199	19.6821	22.3951	25.2373	24.6806	27.6512	22.0313	25.7418	23.2582	23.245	24.6967	32.1491	24.6135	-0.385325	-2.28251	5e-05	0.000553274	yes
D630003M21Rik	chr2:158182532-158229287	WTLV	TGLV	OK	1.05941	0.537741	0.617321	0.777077	0.707168	0.886235	0.955855	0.462853	0.606992	0.671543	1.19845	0.681515	0.623504	0.899667	1.06718	0.482644	1.10515	0.969668	-0.188685	-0.411776	0.2306	0.46541	no
Lbp	chr2:158306492-158332852	WTLV	TGLV	OK	1.90737	1.04187	1.01963	2.71005	1.44572	1.82405	1.1794	1.47967	0.673966	0.630732	0.912177	1.01725	1.05049	0.950143	0.942322	0.945214	1.37325	2.1022	0.614306	1.50541	5e-05	0.000553274	yes
Ralgapb	chr2:158409827-158499253	WTLV	TGLV	OK	4.16456	4.27747	4.15539	5.58144	4.34423	4.39974	4.43197	4.88498	4.85763	3.57522	4.11711	4.45155	4.02517	4.44691	4.11895	3.90873	5.735	5.68873	-0.0116884	-0.0525486	0.88255	0.9482	no
Actr5	chr2:158624622-158639211	WTLV	TGLV	OK	0.616335	0.45286	1.29967	1.01938	0.842705	0.916888	1.00128	1.4107	0.860797	0.827861	0.66913	0.796747	0.837167	1.25018	1.50891	0.576645	1.26707	1.21369	-0.0620978	-0.109619	0.7325	0.873726	no
Ppp1r16b	chr2:158666732-158766334	WTLV	TGLV	OK	2.56322	1.50131	1.39494	2.31991	2.5877	2.38714	2.2111	2.0981	3.07516	2.0965	2.10714	2.61831	2.10777	2.18004	2.598	1.95374	3.51977	2.9374	-0.26094	-0.70675	0.0459	0.157651	no
Dhx35	chr2:158794775-158858220	WTLV	TGLV	OK	3.76562	2.71604	1.68812	2.80687	3.20711	2.50317	2.7018	3.51026	2.79307	1.61879	2.36209	3.26718	3.10296	2.67744	1.90628	2.39156	3.89109	4.08815	0.0712735	0.225805	0.5198	0.740238	no
Gm826	chr2:160260333-160361096	WTLV	TGLV	OK	0.915451	1.08188	1.11003	1.58542	0.545894	0.835636	1.60036	0.812561	0.47717	0.857669	1.25605	1.5208	1.32858	0.399975	1.11802	0.938203	1.30691	1.35286	0.0498529	0.0550611	0.8617	0.937918	no
Mafb	chr2:160363676-160367065	WTLV	TGLV	OK	2.86224	2.48702	3.04466	2.71602	2.47151	3.01093	3.00872	3.58807	2.61249	2.78024	1.97314	2.00627	2.23813	2.11504	2.25674	2.35051	2.94864	3.44407	0.224062	0.791147	0.02305	0.0957368	no
Top1	chr2:160645896-160722764	WTLV	TGLV	OK	19.091	13.7607	14.1069	17.3067	18.4936	18.2229	18.0387	16.4294	15.7746	15.6954	15.9393	17.1984	18.3844	15.9233	15.0646	15.3604	22.3683	21.5177	-0.0559284	-0.324381	0.3581	0.601529	no
Plcg1	chr2:160731309-160872990	WTLV	TGLV	OK	5.23338	6.08894	5.0899	7.63714	6.36116	6.5209	6.60438	6.27719	6.55627	6.90585	6.08746	5.30308	7.54572	6.19332	7.50538	6.36157	8.99048	8.04454	-0.160389	-0.598277	0.092	0.256244	no
Zhx3	chr2:160731309-160872990	WTLV	TGLV	OK	5.36109	4.56816	4.07195	4.55247	3.92498	4.1656	5.34145	4.8206	3.99219	4.22386	4.7772	4.8574	4.49004	4.50375	4.12254	3.6832	5.659	5.55304	-0.0272704	-0.0788094	0.8213	0.918903	no
Lpin3	chr2:160880669-160906000	WTLV	TGLV	OK	0.518512	0.669439	0.478414	0.831518	0.48293	0.694631	0.626246	0.769187	0.388703	0.645713	0.499496	0.492473	0.580719	0.656353	0.372239	0.636889	0.865073	0.839877	-0.0426438	-0.0864271	0.8004	0.907672	no
Chd6	chr2:160946977-161109086	WTLV	TGLV	OK	5.32256	6.86828	4.07442	5.4662	3.88068	4.92595	5.63308	3.321	4.63253	4.03365	3.74918	4.08464	5.12659	4.90847	4.27777	4.95281	6.04103	6.20247	0.0380468	0.202811	0.56285	0.767978	no
Srsf6	chr2:162931507-162937121	WTLV	TGLV	OK	8.88235	7.32566	8.65683	8.9002	10.6603	11.1209	10.8893	8.97129	7.42468	7.65471	7.66277	8.8095	9.67064	8.54201	9.12407	8.39803	11.006	11.4359	0.0552863	0.280009	0.428	0.667477	no
Ift52	chr2:163017292-163046155	WTLV	TGLV	OK	3.66393	3.08225	2.56163	3.02172	2.39564	3.32272	3.50172	3.14972	3.32995	2.38959	2.85848	3.46818	2.79984	2.43898	3.28039	2.6909	4.17886	4.18854	0.00333676	0.010837	0.9758	0.989095	no
Jph2	chr2:163336241-163398049	WTLV	TGLV	OK	41.7313	37.9227	38.1969	41.9629	40.314	39.5216	43.9161	40.5373	40.1354	40.163	42.8884	39.8293	40.0358	39.1282	38.0428	40.652	51.7575	48.2532	-0.101144	-0.641209	0.0701	0.212564	no
Oser1	chr2:163405821-163420363	WTLV	TGLV	OK	1.48535	1.55728	1.73239	2.02535	2.058	1.83286	1.73994	1.89569	1.30794	2.05224	2.13624	1.30326	1.66741	1.95205	2.20758	1.96289	1.82309	1.57808	-0.208216	-0.353501	0.2996	0.543742	no
LOC108168734	chr2:163405821-163420363	WTLV	TGLV	OK	0.493701	1.11747	0.615106	0.496873	0.693985	0.678693	0.442301	0.657355	0.674006	1.35465	0.841607	0.625346	0.390827	0.621482	1.03662	0.886885	1.49016	1.19368	-0.320051	-0.402791	0.24385	0.48059	no
Fitm2	chr2:163468702-163473003	WTLV	TGLV	OK	46.4237	31.9762	38.1747	32.4479	37.0167	37.5584	40.4694	39.1317	26.7675	31.6191	26.5403	26.9864	29.0487	26.6407	30.6224	29.0645	36.2854	44.7468	0.302395	1.65055	5e-05	0.000553274	yes
2310001K24Rik	chr2:163468702-163473003	WTLV	TGLV	OK	3.42042	0.713414	1.81381	1.28858	1.19063	1.45941	1.21632	1.80218	0.562754	0.818258	1.075	1.09028	2.45392	0.932248	0.246203	0.760646	2.79437	3.2641	0.224164	0.127279	0.72335	0.868769	no
Ttpal	chr2:163602280-163619013	WTLV	TGLV	OK	1.73785	1.14434	1.24522	2.08875	1.46958	1.62708	1.75108	1.71489	1.40663	1.27604	1.70594	1.49659	1.57798	1.39291	1.34956	1.65993	1.93884	1.90672	-0.0240961	-0.0774915	0.8195	0.917744	no
Serinc3	chr2:163623272-163645800	WTLV	TGLV	OK	71.2236	60.6355	56.4045	60.4752	67.7153	66.0226	66.7368	63.984	54.8058	57.6916	54.2858	47.2302	50.57	57.4365	48.9129	51.3674	66.1923	73.9622	0.160125	0.976196	0.00555	0.0319625	yes
0610039K10Rik	chr2:163623272-163645800	WTLV	TGLV	OK	4.87e-24	8.72e-24	0.229516	0.192921	0.274691	4.34e-24	0.185369	0.0978134	3.8e-25	1.25e-24	1.09e-29	0.322001	0.562808	0.0856996	0.0921346	4.45e-27	6.61519	8.3074	0.328615	0.335723	0.3401	0.58449	no
Pkig	chr2:163658385-163726158	WTLV	TGLV	OK	62.9739	51.8507	55.683	44.591	55.5002	55.4601	55.4236	51.0672	46.4539	46.8047	50.3995	56.4297	58.3748	53.1448	53.1366	48.1384	67.5385	65.2231	-0.050326	-0.273455	0.4372	0.676296	no
Wisp2	chr2:163820751-163833146	WTLV	TGLV	OK	1.36794	1.42422	0.924259	3.00373	2.49701	1.46673	1.38643	1.3036	0.634084	1.02088	1.47849	1.01695	0.896828	0.758995	0.875378	1.06819	1.30865	2.13357	0.705187	1.39495	5e-05	0.000553274	yes
Ywhab	chr2:163995196-164018588	WTLV	TGLV	OK	16.468	14.991	17.9359	16.4388	17.5138	15.8972	18.4403	16.5444	14.9353	14.9953	15.9795	15.3967	15.4259	15.8365	14.6301	15.9127	19.8839	20.1863	0.0217803	0.117918	0.7397	0.877859	no
Tomm34	chr2:164053537-164071181	WTLV	TGLV	OK	4.77196	4.44235	4.63551	4.69498	4.61245	5.32598	4.55222	5.73265	4.22603	5.03729	3.60471	4.32083	4.92359	6.09347	4.31426	4.09327	6.18531	5.98765	-0.0468578	-0.16592	0.6329	0.81367	no
Stk4	chr2:164074112-164155521	WTLV	TGLV	OK	3.89177	3.75353	4.35297	3.14811	3.82013	3.41768	3.71391	4.84827	3.28656	4.2822	4.24321	3.71881	3.6972	4.25283	3.89807	4.43459	5.49992	4.96203	-0.14848	-0.393226	0.26105	0.500967	no
Sdc4	chr2:164424246-164443188	WTLV	TGLV	OK	2.65485	2.49209	3.38384	2.43957	2.73129	2.95282	2.37156	2.83962	4.06567	3.36805	2.81532	2.73946	3.54703	4.80823	3.40693	4.26152	4.78371	3.40443	-0.490718	-1.65285	5e-05	0.000553274	yes
Sys1	chr2:164456980-164493323	WTLV	TGLV	OK	4.06898	4.41815	4.17313	3.59166	3.64836	3.92583	4.306	2.77404	3.06011	3.82133	5.28848	4.69645	4.2811	4.54014	4.40025	5.15225	5.81104	4.68469	-0.310844	-0.764618	0.02805	0.110638	no
Dbndd2	chr2:164456980-164493323	WTLV	TGLV	OK	1.08804	1.2896	1.28681	1.43061	1.18023	1.2548	1.51582	1.41009	1.4225	1.48259	1.32244	0.897427	1.16165	1.34513	1.29677	1.18133	1.74739	1.64621	-0.0860497	-0.184358	0.5952	0.789219	no
Pigt	chr2:164497509-164508301	WTLV	TGLV	OK	4.48162	3.5153	4.84034	4.5609	5.15338	5.10649	4.79433	4.57792	5.12909	3.61951	4.33753	4.75395	4.64073	3.65585	4.50271	5.06965	6.80742	6.30875	-0.109756	-0.432846	0.21455	0.446187	no
Dnttip1	chr2:164746014-164768220	WTLV	TGLV	OK	5.18601	6.44031	4.98121	5.97093	8.06042	6.12513	7.31008	6.58841	5.9615	7.29259	5.76806	5.26321	7.06292	9.65957	7.31278	5.78637	10.3097	9.3555	-0.140112	-0.484799	0.16095	0.371706	no
Ube2c	chr2:164769928-164772902	WTLV	TGLV	OK	0.357621	0.373597	0.681448	1.52965	1.35729	0.769495	0.341747	0.0906982	1.02528	0.574399	0.281368	0.667549	0	0.245553	0.286053	0.354444	1.00974	1.23883	0.294991	0.363277	0.29855	0.542746	no
Snx21	chr2:164785767-164822127	WTLV	TGLV	OK	4.69368	3.8743	4.12923	4.63426	4.45816	3.84184	3.84507	5.40406	3.34806	2.72488	3.62051	3.58521	3.36481	3.59005	3.35622	3.5701	4.52401	5.34927	0.241739	0.61136	0.0766	0.225511	no
Acot8	chr2:164785767-164822127	WTLV	TGLV	OK	2.76102	0.853396	1.61418	0.453232	1.43692	1.66883	1.32998	1.05035	1.31468	1.86182	1.98795	3.01841	1.41715	1.24967	1.76194	2.15208	3.15297	2.79301	-0.174895	-0.217426	0.51595	0.737259	no
Zswim1	chr2:164822685-164826867	WTLV	TGLV	OK	1.27762	1.1864	0.947815	0.78724	1.24615	0.972458	1.14616	1.4548	0.768879	0.921338	1.0941	0.917786	0.851306	0.787736	0.976057	0.80111	1.15235	1.36972	0.249302	0.561652	0.1124	0.295003	no
Neurl2	chr2:164830729-164857708	WTLV	TGLV	OK	7.10363	6.12214	7.00111	5.41442	5.60916	7.81922	8.00325	8.05781	6.52167	9.00215	7.11694	5.48688	8.68588	8.02752	8.19491	5.8997	7.94083	6.30554	-0.33267	-0.502817	0.15485	0.36322	no
Ctsa	chr2:164830729-164857708	WTLV	TGLV	OK	15.5745	10.1985	11.9266	14.302	13.9677	12.1991	12.9017	12.6761	11.4584	10.8205	10.1435	11.1902	9.43594	10.3345	9.99487	11.3597	13.3992	14.7941	0.142866	0.626188	0.0723	0.217065	no
Pltp	chr2:164830729-164857708	WTLV	TGLV	OK	5.04836	4.61678	5.76094	5.30365	8.18925	7.77957	4.5203	6.88735	4.711	4.73884	4.66137	6.1911	4.67098	5.05519	4.43528	4.40578	9.21881	10.6853	0.212971	0.516588	0.14085	0.341347	no
LOC105244413	chr2:164878286-164891437	WTLV	TGLV	OK	0.807767	0.862939	1.39134	0.752772	1.00632	0.918956	0.700313	1.36545	0.815169	0.426884	0.77028	0.982888	0.777512	0.971251	0.789596	1.04109	0.968674	1.08086	0.158101	0.184644	0.596	0.789837	no
Pcif1	chr2:164878286-164891437	WTLV	TGLV	OK	1.93677	3.15903	2.90465	3.00805	2.58859	3.27159	2.25465	2.81715	2.4068	2.631	2.91704	3.00993	3.08958	2.40554	3.30029	2.41433	3.56347	3.38758	-0.0730257	-0.215969	0.53555	0.748653	no
LOC108168813	chr2:164878286-164891437	WTLV	TGLV	OK	0.0845993	0.397315	0.264988	0.483436	0.164511	0.438658	0.223415	0.425948	5.86e-217	0.390778	0.195282	0.358772	0.172688	0.257988	0.590513	0.228249	0.940518	0.893817	-0.0734766	-0.0789597	0.8282	0.922571	no
Zfp335	chr2:164891891-164921466	WTLV	TGLV	OK	1.97815	1.87284	1.93045	1.8769	2.18216	2.39829	2.23652	2.50903	1.52004	1.7712	1.8674	1.60577	1.80179	1.52921	2.11075	1.55597	2.55696	2.76498	0.112842	0.398121	0.26155	0.501224	no
Zfp335os	chr2:164891891-164921466	WTLV	TGLV	OK	0.549708	0.52566	0.526662	0.592063	0.460974	1.1028	0.244184	0.981488	0.719825	0.233838	0.193112	0.633038	0.325129	0.72957	0.357197	0.365125	0.698556	0.920861	0.398608	0.356121	0.30455	0.549249	no
Ncoa5	chr2:165000352-165034866	WTLV	TGLV	OK	4.50811	3.63641	3.52314	3.66616	4.06583	4.11662	3.21814	4.14772	3.89335	3.58305	3.46275	3.61435	3.46336	3.62403	3.501	3.88336	4.90504	4.77181	-0.0397279	-0.155809	0.6572	0.828169	no
Slc35c2	chr2:165276521-165287888	WTLV	TGLV	OK	3.49757	2.44932	2.80253	3.50473	3.37963	2.8447	3.44969	2.58932	2.09088	2.47668	1.80159	1.95379	2.33859	2.69237	2.70215	1.64973	3.03826	4.06082	0.418527	1.1931	0.00095	0.00746681	yes
Elmo2	chr2:165288030-165326479	WTLV	TGLV	OK	3.36597	1.98334	2.98376	2.12749	3.08644	2.67402	2.0844	3.30916	2.19042	1.91662	2.33109	2.23596	2.2977	1.78116	3.19767	1.87279	3.21713	3.45458	0.102735	0.369889	0.2906	0.534937	no
Zfp334	chr2:165377433-165388317	WTLV	TGLV	OK	1.04574	0.76395	0.823489	0.746016	0.783652	0.915728	0.974017	1.08086	1.09001	0.852037	0.537626	0.819981	0.724516	0.987776	0.775029	0.696029	1.06378	1.08914	0.0339956	0.0939795	0.78745	0.901543	no
Trp53rka	chr2:165490111-165493314	WTLV	TGLV	OK	1.17339	1.81602	1.10075	1.49584	1.46614	1.32785	1.55114	1.44827	1.70872	1.94748	0.861652	1.6688	2.38504	1.3249	1.42663	1.39556	1.68799	1.38869	-0.281576	-0.577868	0.10925	0.289109	no
Zmynd8	chr2:165784151-165898981	WTLV	TGLV	OK	9.07259	8.56296	8.21579	8.51564	8.3935	8.64697	8.8034	8.5466	7.81484	7.2302	8.40624	9.08371	7.64856	7.45954	9.69406	7.37267	11.9593	11.8823	-0.00932321	-0.0465021	0.89325	0.954408	no
Ncoa3	chr2:165992635-166073242	WTLV	TGLV	OK	5.52987	5.46909	5.53816	5.70479	5.60645	5.78929	6.16333	5.70848	4.70649	5.80636	4.98979	5.57317	5.30159	4.94722	5.37811	5.64629	7.17265	7.17947	0.0013727	0.00689382	0.98255	0.992704	no
Sulf2	chr2:166073898-166155683	WTLV	TGLV	OK	22.4463	14.9327	15.5771	15.1103	22.3603	17.9543	18.0237	17.6773	9.12621	7.03559	9.85691	8.83143	9.34202	9.31901	10.0805	8.8553	11.8487	21.5624	0.863789	4.65498	5e-05	0.000553274	yes
Prex1	chr2:166564442-166713832	WTLV	TGLV	OK	1.2635	0.984462	1.40904	1.49172	1.45673	1.60496	0.826489	1.2008	1.15825	0.957669	1.2406	0.889575	1.28523	1.13114	0.90922	0.966722	1.59311	1.80028	0.17638	0.620329	0.08025	0.233238	no
Arfgef2	chr2:166805462-166898052	WTLV	TGLV	OK	6.26626	5.95969	6.5175	6.60202	6.33814	5.79105	6.35624	6.39936	5.84202	5.52994	6.07603	6.41628	6.87072	5.86413	6.03174	5.86383	8.23586	7.84331	-0.0704565	-0.398282	0.25565	0.49494	no
Cse1l	chr2:166906047-166946389	WTLV	TGLV	OK	8.52553	6.89931	7.87045	6.80425	8.10131	8.63528	8.47388	6.79785	7.4153	6.50443	7.00134	7.06843	8.25109	8.14565	6.12527	5.69905	9.96878	10.0476	0.011364	0.056437	0.87165	0.943917	no
Stau1	chr2:166947548-166996299	WTLV	TGLV	OK	9.92845	8.65981	8.50194	8.14806	9.02947	9.47528	10.0843	8.26525	7.91852	8.95759	8.60171	8.52313	8.79948	9.60779	8.17672	8.37057	11.3872	11.0501	-0.0433467	-0.217496	0.5362	0.748826	no
Ddx27	chr2:167015254-167034950	WTLV	TGLV	OK	3.89151	3.66588	4.60124	5.67539	4.64838	5.90924	4.37296	5.62845	3.83707	4.58025	4.34721	4.40903	4.56034	4.56517	3.99413	4.50701	6.0088	6.08643	0.0185208	0.0737682	0.83295	0.925683	no
Znfx1	chr2:167035789-167063015	WTLV	TGLV	OK	7.43051	5.72398	5.59006	7.02407	6.85853	5.99495	6.17178	6.35912	5.70336	6.02652	6.44978	5.80461	6.45089	5.71333	5.93481	5.31626	7.85061	7.81277	-0.00697169	-0.0379427	0.9148	0.964712	no
Zfas1	chr2:167063102-167065862	WTLV	TGLV	OK	3.02022	2.30965	2.70825	3.75482	3.49625	2.03878	1.52797	1.98252	3.68665	3.23399	2.60921	2.84252	3.07088	3.41562	3.41055	1.58474	4.75916	4.37177	-0.122492	-0.205226	0.56605	0.770545	no
Snord12	chr2:167063102-167065862	WTLV	TGLV	OK	0	0	666.331	142.973	0	271.709	135.755	144.115	155.154	1064.81	596.108	454.587	136.419	260.115	272.715	422.396	543.358	207.506	-1.38875	-1.06251	0.14765	0.35149	no
Kcnb1	chr2:167095968-167202996	WTLV	TGLV	OK	4.33109	3.5995	4.31274	4.03126	3.99966	3.77278	3.76848	4.30644	3.77561	3.5492	3.32623	4.26804	4.00253	3.86817	4.09859	3.86606	4.9668	4.79426	-0.0510086	-0.263432	0.4549	0.690911	no
1110018N20Rik	chr2:167095968-167202996	WTLV	TGLV	OK	1.0514	0.990638	1.65095	1.96727	1.01404	1.07297	1.70644	1.23475	0.770113	1.5473	1.38716	1.84406	1.62651	1.59627	1.31824	1.67728	2.01378	1.71388	-0.232636	-0.242868	0.48135	0.710566	no
Ptgis	chr2:167203195-167240537	WTLV	TGLV	OK	2.6082	3.08607	2.46648	3.13301	3.58745	2.69542	3.09544	2.90198	1.92969	1.71172	1.80936	1.48077	2.14105	2.23377	1.37289	1.75115	2.60787	3.77744	0.534536	1.43119	0.00015	0.00149861	yes
B4galt5	chr2:167298443-167349178	WTLV	TGLV	OK	2.96237	1.84398	2.48123	3.19435	3.67603	2.45938	2.28648	3.4015	1.72436	1.65574	1.84409	1.68408	1.45362	1.74347	1.68732	1.93586	2.36914	3.4049	0.523246	1.90746	5e-05	0.000553274	yes
Slc9a8	chr2:167421660-167477000	WTLV	TGLV	OK	1.84876	1.76764	1.96747	2.0741	2.04922	2.12967	1.88302	1.74328	1.64047	1.81032	1.68126	1.78919	1.77179	1.79302	1.75645	1.90981	2.53786	2.46192	-0.0438333	-0.15656	0.6503	0.824303	no
Spata2	chr2:167481135-167516169	WTLV	TGLV	OK	1.33206	1.37456	1.65983	1.4508	1.86376	1.42712	1.72361	1.16479	1.27088	1.10001	1.24832	1.30258	2.01626	1.33924	1.29928	1.42213	1.81	1.82569	0.012458	0.0220716	0.9507	0.978068	no
Rnf114	chr2:167481135-167516169	WTLV	TGLV	OK	10.8406	9.43241	8.07135	10.5062	11.4127	10.6082	8.96906	9.81285	8.85289	10.0843	10.1741	10.2236	10.7613	9.06217	10.0491	9.07678	12.8589	11.8946	-0.112464	-0.491563	0.1604	0.371029	no
Ube2v1	chr2:167553311-167632016	WTLV	TGLV	OK	9.66758	9.35124	8.11248	7.46713	9.2482	8.00836	9.78565	9.22856	8.41841	9.38249	7.27476	7.49347	7.76672	7.67516	7.00094	9.00797	5.35339	5.08474	-0.0742788	-0.239202	0.4925	0.720745	no
Tmem189	chr2:167643224-167661544	WTLV	TGLV	OK	4.98078	3.87786	4.02123	7.01935	5.31303	4.42347	5.91672	3.92752	5.99413	4.82095	5.11095	4.72503	7.76975	5.0312	5.72029	5.87068	7.7547	6.48772	-0.257361	-0.919909	0.0086	0.0447753	yes
Cebpb	chr2:167688914-167690432	WTLV	TGLV	OK	14.8553	14.8062	9.98722	17.6418	11.3689	14.2063	27.9659	15.2208	12.9796	14.5812	11.2203	9.56005	15.9296	9.92807	9.1257	10.748	15.118	18.7069	0.307305	1.35662	0.0001	0.00103854	yes
Ptpn1	chr2:167932008-167979385	WTLV	TGLV	OK	3.8808	3.35343	3.48585	3.66209	3.8412	3.96133	2.81587	3.77788	2.64348	2.15686	2.45389	2.56439	2.46451	2.61742	2.66626	2.6887	3.56396	4.45111	0.320683	1.30869	0.0002	0.00193127	yes
Dpm1-adnp	chr2:168180964-168230379	WTLV	TGLV	OK	8.59509	7.77465	7.55674	6.88553	7.95412	7.42476	9.04431	10.124	6.8352	7.69561	7.90763	7.82845	8.99887	8.64438	8.96481	8.23022	10.6615	10.1202	-0.0751654	-0.340245	0.33615	0.580486	no
Adnp	chr2:168180964-168230379	WTLV	TGLV	OK	2.87537	2.20218	3.03653	2.60238	2.81411	3.06193	2.56443	2.00496	2.46549	2.26659	1.82828	1.40749	1.75267	1.64559	1.79114	1.80858	2.38951	3.03369	0.344363	0.596339	0.09195	0.256165	no
Dpm1	chr2:168180964-168230379	WTLV	TGLV	OK	1.17021	0.646817	0.747193	0.813712	1.07367	1.97363	0.679921	2.04008	0.784232	0.414815	1.25336	1.09372	1.71166	1.61187	0.756901	1.47363	1.57632	1.48113	-0.0898625	-0.0792646	0.8227	0.919444	no
Mocs3	chr2:168230621-168232303	WTLV	TGLV	OK	0.83656	1.06303	1.0326	0.797621	1.27908	1.13686	0.883578	1.78665	0.913663	1.1315	0.831395	0.516605	0.803339	0.927113	0.67619	1.7019	1.20974	1.30703	0.111594	0.199561	0.57535	0.776388	no
Nfatc2	chr2:168476409-168601657	WTLV	TGLV	OK	2.12536	2.2959	1.77447	2.35379	2.35263	2.2912	2.02677	1.89531	2.79118	3.08941	2.22892	2.73516	3.03208	2.86855	2.65936	2.39581	3.67093	2.73524	-0.424478	-1.42701	5e-05	0.000553274	yes
Atp9a	chr2:168634437-168742370	WTLV	TGLV	OK	10.8893	8.785	8.60986	9.56115	11.0017	10.4169	10.6895	10.4769	6.60928	6.78212	6.66544	6.71318	6.77958	7.14683	6.91743	6.65709	9.33117	12.4429	0.415192	2.0627	5e-05	0.000553274	yes
Gm14261	chr2:168748331-168768110	WTLV	TGLV	OK	0.77452	0.421516	0.714391	0.823448	0.806748	0.67151	0.955605	1.05419	0.257213	0.639394	0.5545	0.311506	0.772384	0.55493	0.240903	0.486109	0.655427	0.968699	0.563614	0.671834	0.06105	0.192627	no
Zfp64	chr2:168925360-168955587	WTLV	TGLV	OK	2.22218	1.37568	1.52752	1.51668	1.67553	1.63657	1.7086	1.81382	1.50641	1.69571	0.964615	1.68917	1.54526	1.44982	1.64263	1.6455	2.03599	2.0538	0.0125664	0.0347923	0.92215	0.967789	no
Tshz2	chr2:169632676-170072751	WTLV	TGLV	OK	2.50506	3.16536	2.74	3.49359	2.88041	2.88224	3.30504	3.02224	2.38131	3.02993	2.76605	2.77425	2.69053	3.25807	3.25834	2.53163	3.71105	3.62839	-0.0324975	-0.132244	0.706	0.858213	no
Zfp217	chr2:170108642-170151679	WTLV	TGLV	OK	1.88522	1.62938	1.19684	1.5541	1.56399	1.46956	1.10267	1.88812	1.47954	1.12023	1.24858	1.49853	1.78251	1.54971	1.89067	1.16629	1.91227	1.87618	-0.027486	-0.0962209	0.78055	0.899108	no
Pfdn4	chr2:170482956-170519070	WTLV	TGLV	OK	3.33026	4.59454	3.34725	4.30927	6.15253	4.00374	2.90967	3.9576	4.98997	3.76974	5.09064	4.36417	4.38584	5.48798	4.74089	4.7153	6.43729	4.95322	-0.378086	-0.907558	0.00895	0.0462919	yes
Fam210b	chr2:172345569-172355749	WTLV	TGLV	OK	1.33399	1.89442	1.19792	1.66692	1.67241	1.81267	1.88835	2.06806	1.38519	0.819406	2.07455	1.35098	1.89934	1.28401	1.59334	2.02272	2.10612	2.09493	-0.00768387	-0.0142546	0.96725	0.985563	no
Cstf1	chr2:172356189-172382449	WTLV	TGLV	OK	4.90339	4.13402	3.96632	4.221	4.70926	5.07057	4.09288	4.98197	3.86464	4.41594	3.47681	3.54893	2.83012	4.21919	4.53052	3.75528	5.06637	5.63369	0.153128	0.491697	0.1644	0.377316	no
Rtfdc1	chr2:172440577-172469899	WTLV	TGLV	OK	5.74354	5.03715	5.39587	5.76353	5.91747	6.05475	5.77748	5.86069	5.37416	4.33382	4.93291	4.81868	6.06378	6.41138	4.78758	4.22778	8.00016	8.16394	0.0292371	0.118457	0.73785	0.87666	no
Gm14303	chr2:172494288-172514885	WTLV	TGLV	OK	340.273	281.66	307.949	309.773	332.286	306.675	295.864	326.195	336.587	340.672	323.131	323.851	351.223	351.549	299.582	279.585	41.5794	35.9869	-0.208398	-0.574457	0.10365	0.279607	no
Rae1	chr2:173000111-173015739	WTLV	TGLV	OK	4.31602	3.24196	3.42371	2.6403	3.92581	3.7639	3.84138	4.20674	3.55674	4.34976	4.10532	2.66293	4.67285	3.60269	3.53351	3.61754	6.09839	5.6679	-0.105614	-0.3544	0.31155	0.556948	no
Rbm38	chr2:173021901-173034734	WTLV	TGLV	OK	33.0158	30.1207	29.0605	30.3133	29.8541	29.9658	37.5511	35.584	33.2573	33.935	31.8138	33.1422	39.5343	32.5052	29.9034	30.4263	42.5966	37.9789	-0.165539	-0.923171	0.0091	0.0468628	yes
Zbp1	chr2:173206611-173218922	WTLV	TGLV	OK	1.12417	1.1487	1.05497	1.03384	1.87784	1.21042	0.797982	0.456518	0.491485	0.820448	1.03924	1.19953	0.382142	0.618397	0.647794	0.223192	1.0232	1.6474	0.687104	0.688031	0.0427	0.150014	no
Pmepa1	chr2:173224457-173276533	WTLV	TGLV	OK	4.82876	3.66125	4.35935	4.27558	6.58553	4.6896	4.50401	5.19681	3.61603	4.12898	4.09535	4.29871	4.74118	3.27083	3.73559	4.10246	5.16076	5.66383	0.134196	0.604591	0.0845	0.241729	no
Rab22a	chr2:173659764-173702186	WTLV	TGLV	OK	14.7342	12.3347	10.1473	12.6877	12.5581	11.1708	12.0016	12.1594	10.3812	10.7083	13.0138	11.4009	11.9253	10.8328	11.6146	10.8533	15.1489	15.2423	0.00886697	0.0408985	0.9072	0.960722	no
Mir6340	chr2:173659764-173702186	WTLV	TGLV	OK	1.69e-41	6.11e-108	5.07808	10.6193	25.4139	1.61e-66	1.28e-15	1.26e-39	4.04e-86	1.65e-35	0.0180181	6.29e-73	22.4401	7.7e-07	0	1.80908	91.5953	101.602	0.149581	0.0996953	0.8612	0.937869	no
Vapb	chr2:173737570-173784336	WTLV	TGLV	OK	7.91437	7.2867	6.80798	7.32566	7.96709	7.15429	8.06912	8.56604	7.45555	6.96933	7.33285	7.26083	7.99765	8.28579	8.48384	7.72002	10.0749	9.11871	-0.14387	-0.809485	0.02165	0.0909116	no
Stx16	chr2:174076260-174099771	WTLV	TGLV	OK	2.50359	2.38895	2.50979	3.00631	3.14785	2.48569	2.46346	2.70405	2.54214	2.07206	2.04887	1.60793	2.1764	2.23942	2.87063	2.15685	3.08109	3.30526	0.101325	0.367217	0.28885	0.533376	no
Npepl1	chr2:174110337-174122702	WTLV	TGLV	OK	11.7045	11.5286	12.1209	11.735	11.6004	10.7529	12.7765	12.0266	10.3078	11.1931	10.1186	10.7085	11.263	12.6775	11.6674	12.3863	14.8475	14.3599	-0.0481768	-0.213927	0.539	0.750628	no
Gnas	chr2:174281236-174346744	WTLV	TGLV	OK	269.813	224.766	224.239	222.248	249.989	239.142	246.58	236.545	234.388	239.476	229.718	229.615	243.046	234.807	222.589	216.537	300.108	286.088	-0.069026	-0.45585	0.1939	0.420852	no
Nelfcd	chr2:174415803-174439039	WTLV	TGLV	OK	5.36464	5.65165	5.22384	5.52539	5.58589	5.46031	4.88669	4.71024	4.07737	4.06471	5.33152	4.1829	5.69387	4.27949	3.40274	4.25981	6.49216	6.92005	0.0920847	0.282564	0.4224	0.662411	no
Ctsz	chr2:174415803-174439039	WTLV	TGLV	OK	9.31695	7.33197	9.01177	8.79406	10.6056	8.8596	7.89737	10.6799	6.38135	5.80547	4.58322	4.88475	5.76245	7.56592	6.61877	4.85186	7.76897	10.9102	0.489879	1.30121	0.0006	0.00505513	yes
Atp5e	chr2:174461074-174464101	WTLV	TGLV	OK	402.764	385.721	389.665	325.767	351.775	355.156	374.302	318.381	406.953	428.636	396.693	406.635	395.929	375.775	380.688	368.081	508.469	432.409	-0.233764	-1.39754	5e-05	0.000553274	yes
Slmo2	chr2:174465075-174472991	WTLV	TGLV	OK	18.3565	13.4929	14.5683	15.4007	16.7297	14.9396	18.7498	14.8698	13.5163	12.7232	17.0077	15.4402	15.1101	12.5276	15.4607	15.6745	19.0674	19.4635	0.0296698	0.134411	0.70645	0.858496	no
Gm14391	chr2:175060349-175206924	WTLV	TGLV	OK	5.14708	4.08469	3.41723	4.4498	3.9653	4.36537	3.73565	4.40657	3.13995	3.44224	4.31347	4.29381	3.74519	4.13847	3.75359	3.94297	2.25772	2.43896	0.111401	0.277586	0.42365	0.663844	no
LOC105244398	chr2:175060349-175206924	WTLV	TGLV	OK	1.78268	2.76707	2.20841	2.56117	2.39757	2.23329	2.43198	2.07116	1.35514	1.14708	1.89461	2.01009	0.916539	2.07269	1.87174	2.31558	2.88818	3.29092	0.188328	0.1062	0.75955	0.887233	no
Gm14440	chr2:175275124-175286805	WTLV	TGLV	OK	2.55637	2.46151	1.99808	1.91113	2.27835	2.27948	2.2972	2.24273	1.61274	1.58294	1.76348	1.74228	1.78499	1.8962	1.79504	1.65831	2.44742	3.18298	0.379117	1.26866	0.00035	0.00316767	yes
Gm1980	chr2:176296639-176302897	WTLV	TGLV	OK	2.14161	1.83225	1.58133	1.67955	1.922	1.74863	2.08647	1.59169	1.2214	1.31974	1.2621	1.31136	1.15076	1.17173	1.19902	0.96095	1.90404	3.48491	0.872062	2.53327	5e-05	0.000553274	yes
Gm14435	chr2:176423636-176436274	WTLV	TGLV	OK	3.83737	3.6858	2.88343	3.18023	3.57396	4.12672	3.77581	3.63195	2.64913	2.58775	2.70648	2.81136	2.72911	3.3809	2.73614	2.91477	0.933651	1.12345	0.266978	0.594587	0.0914	0.255113	no
Gm14295	chr2:176798182-176813621	WTLV	TGLV	OK	1.80673	1.51122	1.15024	1.11354	1.68157	1.46536	1.33939	1.64574	1.00424	1.24034	1.2396	1.92826	1.48291	1.35155	1.62375	1.48637	6.172	6.06275	-0.0257651	-0.0733034	0.83255	0.925673	no
Gm14403	chr2:177000954-177512311	WTLV	TGLV	OK	3.72428	4.62266	3.35119	3.11189	3.81059	3.66127	4.09244	3.22386	1.97441	2.87793	3.0681	3.14426	2.31605	3.41039	3.04415	2.6881	3.40578	4.24668	0.318349	0.620759	0.08195	0.236609	no
LOC102639713	chr2:177000954-177512311	WTLV	TGLV	OK	3.40393	3.49894	2.95528	2.47684	3.00417	3.33594	2.7001	2.68248	2.11012	2.03125	2.36977	2.3865	2.14189	1.8483	1.90182	1.95859	1.57238	1.90932	0.280105	0.203834	0.5652	0.769982	no
Zfp970	chr2:177000954-177512311	WTLV	TGLV	OK	13.3381	11.8138	9.8137	9.20364	11.0671	10.4584	11.1888	10.4772	7.72457	7.54413	7.85043	8.0005	7.51065	7.92391	7.23742	7.69319	14.3106	18.3193	0.356281	1.82734	5e-05	0.000553274	yes
Gm14322	chr2:177759148-177773275	WTLV	TGLV	OK	0.834478	0.595421	0.574539	0.433574	0.935533	0.661865	0.72231	0.729956	0.533081	0.494024	0.472181	0.922535	0.531744	0.581314	0.529436	0.539119	1.10988	1.26202	0.185324	0.448412	0.20205	0.430872	no
Gm14325	chr2:177828990-177840336	WTLV	TGLV	OK	2.89811	2.35763	2.49372	2.28606	2.96094	2.34577	2.4321	2.40125	2.02895	2.00223	2.48095	2.30122	2.48648	2.64459	2.24792	2.21289	1.28788	1.3469	0.0646404	0.182866	0.60115	0.792224	no
Zfp972	chr2:177897162-177927850	WTLV	TGLV	OK	0.0478547	0.451785	0.280577	0.182328	0.653463	0.323618	0.104527	0.679656	0.302392	0.0341612	0.185028	0.068059	0.0459543	0.292075	0	0.292483	1.80323	1.59445	-0.177525	-0.208728	0.5459	0.7563	no
Gm14326	chr2:177935992-177958134	WTLV	TGLV	OK	4.60678	3.11424	3.10358	3.06812	3.95546	3.3762	3.09969	3.6793	2.5145	2.76269	2.97011	3.19812	2.92622	3.2809	3.06304	2.97578	1.52085	1.54813	0.0256416	0.0447286	0.89545	0.955637	no
Zfp971	chr2:178023283-178035859	WTLV	TGLV	OK	10.5875	8.43411	8.86982	8.10138	9.2913	9.19163	8.79456	8.88806	8.07302	8.11595	7.19941	7.77865	7.27685	6.68113	7.51042	6.9915	13.9249	15.6394	0.167514	0.606174	0.0843	0.241391	no
Zfp931	chr2:178066877-178078425	WTLV	TGLV	OK	1.2726	1.11516	1.44142	1.47817	0.866978	1.35315	1.13819	0.913728	0.607274	1.21008	1.16983	1.24222	1.35626	0.975876	1.13671	0.552038	0.845051	0.896052	0.0845444	0.132443	0.707	0.858817	no
Ppp1r3d	chr2:178411205-178414463	WTLV	TGLV	OK	1.94022	1.24732	1.6001	1.39477	1.9381	2.20208	1.9356	2.35761	1.58346	1.32415	1.6104	1.63743	1.45368	1.52253	1.71907	1.39469	1.96708	2.15828	0.133827	0.397716	0.2635	0.502976	no
Fam217b	chr2:178414533-178422181	WTLV	TGLV	OK	2.5941	2.88275	3.28668	2.43469	2.17535	2.62286	2.51064	2.30235	1.90105	2.03555	2.79154	1.39705	2.55574	2.1026	2.95576	1.92688	2.94589	3.19377	0.116558	0.34431	0.3301	0.575498	no
Cdh4	chr2:179442430-179899377	WTLV	TGLV	OK	0.163144	0.122757	0.209897	0.54691	0.382033	0.52554	0.379551	0.257069	0.481345	0.507315	1.22263	0.530217	0.41747	0.544715	0.521846	0.386118	0.849756	0.429786	-0.983431	-1.42389	5e-05	0.000553274	yes
Taf4	chr2:179912145-179976646	WTLV	TGLV	OK	3.63458	2.90538	3.78995	3.13948	3.36756	3.32871	3.80476	4.55715	3.18893	3.58503	3.18346	4.25976	3.08928	3.21492	4.11546	3.68514	4.87169	4.47797	-0.121577	-0.483326	0.1685	0.382937	no
4921531C22Rik	chr2:179976852-179979013	WTLV	TGLV	OK	1.95142	1.66996	0.942227	1.23228	1.21914	1.06115	1.79167	1.04804	0.794004	0.614569	0.762649	1.51009	1.6902	1.4012	1.24872	1.44108	1.52005	1.63994	0.109531	0.230626	0.50685	0.731787	no
Lsm14b	chr2:180024899-180035466	WTLV	TGLV	OK	14.9513	12.1992	11.9451	11.586	11.8405	13.6306	12.8884	11.9288	10.4751	12.8818	11.5143	13.3745	13.3445	11.5612	12.0261	11.7972	16.2102	15.4705	-0.0673823	-0.343825	0.3241	0.569655	no
Psma7	chr2:180036366-180042464	WTLV	TGLV	OK	56.051	44.0601	42.8061	38.1553	53.2713	53.1076	49.9134	52.1183	48.9802	50.367	42.2082	51.2842	48.9893	46.462	50.6331	47.3859	62.1932	57.6664	-0.109027	-0.572018	0.10505	0.281713	no
Mtg2	chr2:180070592-180085902	WTLV	TGLV	OK	5.84766	6.66097	4.79376	4.39342	4.77783	5.43156	6.33331	5.04492	5.49959	4.99633	4.71821	3.86793	6.6707	4.58151	5.08771	5.77992	7.07653	6.83702	-0.049673	-0.165677	0.6327	0.813501	no
Osbpl2	chr2:180119365-180176284	WTLV	TGLV	OK	11.3058	8.28343	7.81186	8.82685	9.31645	9.36027	10.6868	10.1114	8.17139	8.67467	8.11751	7.65708	8.6118	8.96084	7.95783	8.40994	11.2297	11.7669	0.0674167	0.260703	0.45705	0.692956	no
Adrm1	chr2:180119365-180176284	WTLV	TGLV	OK	11.6746	9.46784	9.49437	7.77168	9.90432	9.26076	10.1967	8.37806	8.87174	8.72991	8.11999	6.76967	9.12391	7.36959	9.63483	7.94558	16.0014	17.4482	0.124876	0.395131	0.267	0.506876	no
Lama5	chr2:180176372-180225912	WTLV	TGLV	OK	5.28488	7.22413	5.89462	6.3985	6.30196	7.62044	6.48676	6.26298	7.32189	6.53043	6.2076	6.71593	7.46692	6.26774	6.40394	6.01259	9.09386	8.22945	-0.144096	-0.855308	0.01515	0.06984	no
Rps21	chr2:180257369-180258444	WTLV	TGLV	OK	28.0889	33.2646	13.3502	17.1871	36.7117	27.7139	21.2945	24.1492	17.835	23.9505	18.1381	21.8956	17.2009	25.7849	26.3263	22.2257	242.566	223.788	-0.116246	-0.609941	0.08035	0.233414	no
Cables2	chr2:180258538-180273490	WTLV	TGLV	OK	2.02667	2.1938	2.14715	2.14463	2.06419	2.56126	2.61693	2.50157	2.10091	1.79321	1.82536	2.21706	1.97149	2.08069	2.0041	1.67179	3.04643	3.31051	0.119932	0.39807	0.259	0.498651	no
Mir1a-1hg	chr2:180370857-180401802	WTLV	TGLV	OK	1.00414	0.965743	1.24055	1.08206	0.806567	1.47341	1.54216	0.33349	1.09669	1.30561	1.2791	1.30058	1.58414	0.952126	1.06408	1.13537	1.55544	1.26578	-0.297297	-0.603744	0.0917	0.255529	no
Mrgbp	chr2:180581222-180586304	WTLV	TGLV	OK	3.04148	2.74338	2.27077	3.72514	2.83099	4.24496	3.29035	3.9653	3.55206	2.50258	3.7811	2.78827	4.15656	3.58411	3.48102	3.3165	4.7735	4.59287	-0.0556531	-0.137639	0.70135	0.854933	no
Ogfr	chr2:180589374-180595837	WTLV	TGLV	OK	6.6222	7.12108	6.08038	7.98512	7.92422	6.85817	6.96779	6.78135	5.37633	6.72299	6.1857	5.74797	6.9591	7.00639	6.30285	6.12992	8.37969	8.69819	0.0538186	0.226406	0.5245	0.742587	no
Dido1	chr2:180598101-180710028	WTLV	TGLV	OK	6.92405	6.78633	6.18176	6.1729	7.20036	6.71176	6.86369	6.98605	5.43224	5.30947	5.08424	5.91416	6.16803	5.41748	6.22075	6.33067	7.52478	8.19471	0.123043	0.656344	0.0634	0.197774	no
Gid8	chr2:180710225-180721599	WTLV	TGLV	OK	11.94	10.6839	11.4695	10.5066	11.8471	11.7056	14.0609	13.0498	8.15677	8.4738	7.98711	8.77099	8.74537	9.50694	9.07359	8.6337	12.0679	15.0615	0.319692	1.7618	5e-05	0.000553274	yes
Ythdf1	chr2:180904376-180920936	WTLV	TGLV	OK	3.97221	4.27958	5.63578	4.99163	4.95638	5.03693	5.66239	3.82929	4.88959	4.01837	3.82167	3.88583	5.01571	3.75713	3.83381	3.91518	5.37664	5.78271	0.105043	0.433074	0.21075	0.44131	no
Arfgap1	chr2:180966496-180982524	WTLV	TGLV	OK	4.23746	3.41564	4.06504	3.69676	3.54802	4.55904	2.82413	4.01479	2.85345	3.49102	3.39302	4.13213	3.15833	3.0346	4.07637	3.26873	5.2347	5.30472	0.0191714	0.0711368	0.83885	0.92837	no
Eef1a2	chr2:181147691-181157015	WTLV	TGLV	OK	349.464	304.758	297.764	312.606	337.804	326.983	345.754	324.316	327.931	339.558	340.671	345.938	360.934	350.977	336.266	343.05	441.472	386.29	-0.192636	-1.28162	0.0003	0.00278329	yes
Ppdpf	chr2:181187221-181188506	WTLV	TGLV	OK	13.6169	8.45782	11.038	10.0337	12.7652	12.718	8.88395	9.05248	5.39224	8.43984	8.76402	11.1683	10.9133	8.88894	9.77724	8.71629	7.39514	8.31511	0.169158	0.447953	0.20265	0.431763	no
Helz2	chr2:181227614-181242058	WTLV	TGLV	OK	2.4039	1.9141	1.82765	2.08423	1.90838	2.04508	1.69414	1.62629	1.63117	1.63026	1.70239	1.13645	1.46471	1.45744	1.6086	1.60858	2.04316	2.3522	0.203212	0.872482	0.0138	0.06527	no
Gmeb2	chr2:181251448-181287974	WTLV	TGLV	OK	1.1309	1.26986	1.42183	1.43785	1.34661	1.45735	1.82618	1.53819	1.18336	1.26158	1.17668	1.28425	1.30621	1.08629	1.01285	0.988437	1.62934	1.79779	0.141935	0.426163	0.21775	0.450309	no
Rtel1	chr2:181319710-181356616	WTLV	TGLV	OK	0.692423	0.879195	0.919459	0.639751	0.653982	0.663101	0.584712	0.446827	0.497416	0.450681	0.656751	0.435012	0.90196	0.78125	0.708583	0.400815	0.919733	1.02275	0.153168	0.324258	0.27995	0.522653	no
Arfrp1	chr2:181357689-181492983	WTLV	TGLV	OK	6.55838	5.02474	4.60488	6.61199	6.60293	5.35583	5.23126	6.1464	4.24272	6.68598	5.75377	6.65135	5.65333	4.63798	6.35314	4.29501	7.76768	6.97842	-0.154583	-0.38451	0.27705	0.519486	no
Zgpat	chr2:181357689-181492983	WTLV	TGLV	OK	3.93672	2.91944	4.2847	3.96277	3.83428	4.11264	3.47613	4.00264	2.81495	4.36872	2.87382	4.27059	4.80509	4.21469	4.06266	3.15582	5.25763	4.81131	-0.127982	-0.28472	0.41875	0.658669	no
Zbtb46	chr2:181357689-181492983	WTLV	TGLV	OK	5.69238	4.27856	3.10574	5.33473	4.04202	4.06828	3.64755	3.0821	3.1664	3.50788	3.48013	3.08592	4.1275	3.05497	4.84774	2.84675	4.60695	5.02117	0.12421	0.249412	0.47255	0.704256	no
Lime1	chr2:181357689-181492983	WTLV	TGLV	OK	1.92852	1.44643	1.60908	1.26905	1.25117	1.34774	1.24043	1.54255	0.850607	1.11193	1.16717	1.38456	1.81632	1.0865	1.56631	1.02921	1.64315	1.80455	0.135173	0.176994	0.6181	0.803792	no
Tpd52l2	chr2:181497103-181517962	WTLV	TGLV	OK	13.7631	15.7678	14.6299	15.871	19.01	11.3428	14.9544	16.5848	17.0991	16.7251	16.3438	19.6964	13.0736	16.0558	16.8346	19.8205	21.6507	18.3341	-0.239882	-0.618356	0.0756	0.223696	no
Dnajc5	chr2:181520179-181552886	WTLV	TGLV	OK	9.01742	7.55451	8.69252	8.08397	9.62684	7.85354	7.70948	9.17457	6.57512	7.40222	7.8911	7.62618	7.17255	6.53654	7.57724	7.45393	9.54442	10.1665	0.0910917	0.47057	0.1784	0.397755	no
Uckl1	chr2:181569151-181593217	WTLV	TGLV	OK	3.37529	3.00896	3.44292	3.06873	3.25954	3.67995	2.10561	3.70395	2.3428	3.82014	2.84451	3.8658	3.98301	3.8077	3.93503	3.43911	5.4919	4.8281	-0.185849	-0.428555	0.2137	0.445045	no
Uckl1os	chr2:181569151-181593217	WTLV	TGLV	OK	1.43231	1.36873	1.23239	2.51501	1.67017	3.03556	1.64931	2.62063	0.742353	1.45773	1.98495	0.955217	2.33688	1.55087	2.37603	1.51023	2.27651	2.36253	0.0535128	0.0630849	0.8613	0.937892	no
Zfp512b	chr2:181569151-181593217	WTLV	TGLV	OK	2.54831	2.61579	2.15894	2.29187	2.01551	1.79967	2.38584	2.93071	1.84598	2.26798	1.73303	2.15998	1.88082	1.7963	1.90178	2.02648	2.72684	3.00129	0.138354	0.379333	0.2792	0.522159	no
Prpf6	chr2:181601318-181655661	WTLV	TGLV	OK	9.61492	8.94962	9.13219	8.84922	11.0863	9.95931	9.27545	9.89299	8.82991	9.70854	8.8406	7.86844	9.49627	9.51341	9.55775	8.73728	12.2839	12.1457	-0.0163247	-0.0816043	0.81235	0.914474	no
Sox18	chr2:181669836-181671640	WTLV	TGLV	OK	10.7151	5.63691	7.7653	12.8666	10.9894	12.6658	7.64664	8.86398	6.83073	7.73105	9.745	7.65219	6.44753	7.1994	7.19502	8.4321	10.0227	11.5117	0.199841	0.800633	0.02215	0.0926493	no
Tcea2	chr2:181680271-181688069	WTLV	TGLV	OK	0.713826	0.570569	0.358925	0.477753	0.287587	0.972753	0.777658	1.22083	1.11408	0.451859	1.28032	0.435029	0.246217	0.980628	0.650551	0.859814	1.2727	0.880301	-0.531826	-0.69127	0.04695	0.160234	no
Rgs19	chr2:181688418-181693977	WTLV	TGLV	OK	2.05249	1.63519	1.98105	2.12115	3.07518	1.75049	2.01273	2.56666	1.51015	3.34459	1.26132	2.61127	2.29297	2.25645	1.83077	1.60706	2.77273	2.71706	-0.0292581	-0.0545547	0.8753	0.944099	no
Pcmtd2	chr2:181830307-181857460	WTLV	TGLV	OK	6.91482	7.33363	6.2907	6.25555	8.75111	8.02715	7.64111	7.08203	7.51348	8.8357	6.96101	7.13045	7.59671	7.31889	7.30132	7.61677	9.84384	8.76893	-0.166821	-0.810463	0.0228	0.0948984	no
Polr3k	chr2:181864359-181870830	WTLV	TGLV	OK	1.50751	1.59986	1.62744	1.44495	1.56968	1.85356	1.96653	2.06336	1.75099	1.53734	1.25511	1.14856	1.67743	1.38014	1.44699	1.56527	1.9315	2.09481	0.117101	0.329877	0.3516	0.595686	no
Pex2	chr3:5560187-5576539	WTLV	TGLV	OK	5.07882	4.95556	3.75557	3.28402	5.18265	3.91226	5.18411	4.1238	4.86987	4.15682	4.55447	4.25624	4.41442	3.93047	5.67185	3.72641	5.84583	5.59303	-0.063778	-0.225459	0.5194	0.740061	no
Gm8797	chr3:5750892-5751295	WTLV	TGLV	OK	100.535	82.8811	81.0368	79.5758	96.8888	94.9185	88.2292	91.621	82.5949	90.4689	76.4537	73.8607	84.9499	78.6335	77.8889	71.6409	5.7301	6.32623	0.142785	0.210767	0.54025	0.751749	no
Pkia	chr3:7366603-7445366	WTLV	TGLV	OK	20.5241	16.5705	17.4416	18.8174	17.9304	17.478	17.2513	18.4094	20.7213	24.433	22.5239	23.4513	23.2392	26.4724	21.579	23.1387	29.9513	21.4448	-0.481994	-2.82669	5e-05	0.000553274	yes
Zc2hc1a	chr3:7503414-7553848	WTLV	TGLV	OK	1.67069	1.57056	1.49954	1.2455	1.52698	1.43991	1.28117	2.01297	1.80215	1.52391	1.27659	2.04605	1.01014	1.68059	1.34625	1.247	2.06384	2.08449	0.0143625	0.0431044	0.90065	0.957783	no
LOC102634900	chr3:7572027-7689998	WTLV	TGLV	OK	1.12147	0.576504	1.5896	1.05578	0.263207	1.11484	0.477303	0.52686	0.950277	0.217744	3.49318	0.268607	0.312259	1.23251	0.408176	0.70681	1.28829	1.17997	-0.126701	-0.0801418	0.77225	0.893684	no
Stmn2	chr3:8509526-8561604	WTLV	TGLV	OK	1.11028	1.63539	1.43662	1.92657	2.40383	2.12356	1.39028	1.82545	1.79801	1.31185	2.6106	1.38847	1.72796	1.47213	1.54344	0.872746	2.20185	2.1585	-0.0286874	-0.0691276	0.84095	0.929248	no
Hey1	chr3:8663358-8667038	WTLV	TGLV	OK	2.13592	1.29897	2.4793	3.405	2.95712	1.99576	2.14504	1.81004	1.36414	2.22176	1.93711	2.32488	1.02552	2.13567	1.77985	2.71463	2.6153	2.83127	0.11447	0.317178	0.37005	0.613586	no
Mrps28	chr3:8802145-8923857	WTLV	TGLV	OK	28.8325	20.7206	25.2836	22.7095	27.4893	23.9765	25.7558	27.3419	29.8469	27.9201	26.0382	28.8822	34.0677	24.7896	27.0734	28.7006	37.1696	29.9571	-0.311224	-1.29404	0.0004	0.00354693	yes
Gm41995	chr3:8802145-8923857	WTLV	TGLV	OK	4.92304	0	5.68539	0	0	5.74541	2.41735	7.30384	5.52555	0	2.65368	0	0	2.31589	2.42808	0	40.7779	8.18181	-2.31729	-9.56548	0.2244	0.45853	no
Tpd52	chr3:8929430-9004771	WTLV	TGLV	OK	2.4811	2.37455	2.66537	2.68401	3.52051	2.35117	2.59376	2.76971	2.30972	2.43364	2.56379	2.69389	3.01484	2.16761	2.93485	2.8913	4.43111	4.16994	-0.0876434	-0.28786	0.3909	0.634027	no
Zbtb10	chr3:9250566-9285333	WTLV	TGLV	OK	1.65424	1.74484	1.63407	1.55629	1.91671	2.13653	1.89727	2.06579	1.86652	1.9783	1.66463	1.68299	1.84755	1.48155	1.52311	1.57717	2.23206	2.19087	-0.0268704	-0.109921	0.7533	0.883568	no
Zfp704	chr3:9427009-9610085	WTLV	TGLV	OK	2.06392	2.26663	2.36088	2.25188	2.10799	2.36159	2.30911	2.18779	2.16504	2.14325	2.14972	2.03521	2.10554	1.93298	2.5104	1.84376	2.75983	2.71296	-0.0247114	-0.124584	0.7285	0.871387	no
Fabp5	chr3:10012584-10016610	WTLV	TGLV	OK	17.4918	13.9639	11.9743	24.1814	17.501	16.7346	17.2319	15.0709	12.2046	13.4195	13.7107	15.2173	15.312	15.482	15.9602	14.3006	30.1049	31.9945	0.0878272	0.398257	0.25475	0.493925	no
Fabp4	chr3:10204341-10208602	WTLV	TGLV	OK	403.39	384.396	332.344	507.183	376.733	363.534	395.088	381.896	375.327	386.162	373.886	391.411	389.192	376.952	405.728	381.493	495.527	468.304	-0.0815183	-0.522489	0.13485	0.331286	no
Impa1	chr3:10311955-10331439	WTLV	TGLV	OK	3.14974	2.9483	2.96018	2.73746	3.00496	1.96449	2.2347	2.51586	1.38931	2.3965	1.68767	1.85826	2.27824	2.05913	2.73058	1.49853	2.88029	3.43827	0.255468	0.743028	0.03435	0.128584	no
Zfand1	chr3:10339955-10351338	WTLV	TGLV	OK	1.735	1.62724	2.34099	1.06582	2.15361	1.46527	2.38045	1.97749	1.61777	1.81598	1.9619	2.23519	2.40864	2.81558	1.6481	1.4582	3.64565	2.80266	-0.37938	-0.987782	0.0048	0.0283471	yes
Chmp4c	chr3:10366972-10391005	WTLV	TGLV	OK	4.06241	3.46752	4.37872	3.84072	3.34551	3.84571	4.1958	4.1628	3.00271	5.14085	5.42389	3.67664	4.33454	2.74242	4.84462	3.41628	5.49294	4.88286	-0.169854	-0.552325	0.1181	0.305023	no
Snx16	chr3:10417816-10440130	WTLV	TGLV	OK	2.24094	1.69497	2.72312	2.07242	3.30073	3.82844	2.4261	2.55307	2.01162	1.67621	3.93207	1.45726	1.6909	2.07174	3.76688	3.36357	3.38863	3.27795	-0.0479112	-0.0954951	0.78205	0.899248	no
Lrrcc1	chr3:14533787-14572658	WTLV	TGLV	OK	4.17596	2.00862	3.13345	4.02481	3.71357	3.4271	2.74638	3.17333	2.54674	2.27306	3.964	3.15085	2.82821	2.04413	3.17219	3.6876	4.09014	4.24538	0.0537438	0.201407	0.5665	0.770688	no
E2f5	chr3:14578601-14611256	WTLV	TGLV	OK	0.968815	0.821409	1.01619	0.466353	1.30612	1.05899	1.05163	0.940091	0.57988	0.496154	0.795477	1.17175	1.29642	1.46629	0.849065	1.33764	1.4177	1.34357	-0.077475	-0.100695	0.77275	0.894059	no
1810022K09Rik	chr3:14578601-14611256	WTLV	TGLV	OK	17.6229	13.0869	17.3604	14.8693	15.2305	17.922	22.8144	16.0691	16.652	18.3873	23.1935	16.0537	18.9333	17.4996	17.0336	18.0888	59.4794	47.9568	-0.310656	-1.02463	0.004	0.0243897	yes
Car2	chr3:14886277-14900770	WTLV	TGLV	OK	1.0259	0.381046	1.1732	1.13908	0.816397	1.33163	0.998514	0.707676	1.47279	0.885003	0.602655	1.02079	1.21578	0.797477	0.905926	0.610247	1.36	1.32267	-0.0401516	-0.0761605	0.8288	0.922978	no
Ythdf3	chr3:16183140-16217037	WTLV	TGLV	OK	7.41469	6.6578	7.34721	6.37489	6.72035	6.89806	6.64375	6.89267	6.71653	5.6774	6.61599	6.88074	7.45492	6.68282	6.16636	6.69237	8.7196	8.29419	-0.0721605	-0.374645	0.287	0.531204	no
Gm42186	chr3:17117132-17139762	WTLV	TGLV	OK	522.873	314.173	387.715	557.187	461.171	705.927	382.097	436.83	940.578	526.948	419.452	492.109	413.502	563.17	413.315	609.681	1437.71	1210.14	-0.248597	-0.32502	0.3432	0.586918	no
Armc1	chr3:19132143-19163090	WTLV	TGLV	OK	9.03918	6.95723	8.69952	8.1392	9.47986	7.2799	7.56968	9.34283	6.33135	7.79231	8.90501	8.23191	8.87969	7.84364	8.19735	7.02666	10.4633	10.1325	-0.0463421	-0.218796	0.5385	0.750354	no
Mtfr1	chr3:19187313-19220817	WTLV	TGLV	OK	7.52772	7.05082	6.311	7.32768	6.36321	6.83795	7.20539	7.73915	7.22346	6.22441	5.44681	6.96928	7.5132	6.51614	6.38452	7.0693	9.09446	8.91131	-0.0293518	-0.133482	0.70285	0.855825	no
Pde7a	chr3:19223107-19311322	WTLV	TGLV	OK	4.03	4.57871	3.04869	4.21374	3.80372	6.3045	5.43183	5.13033	5.70365	4.28191	4.76946	3.32594	4.49526	5.92298	4.25857	4.83784	6.68197	5.87188	-0.18645	-0.609253	0.08475	0.242035	no
n-TRacg3	chr3:19623565-19629477	WTLV	TGLV	OK	15.3786	0	0	92.8645	0	0	352.705	0	100.776	0	0	0	0	0	265.703	15.242	58.5393	66.0087	0.17325	3.56038	0.85175	0.933681	no
Trim55	chr3:19644342-19692348	WTLV	TGLV	OK	35.5581	32.8913	35.6422	29.4286	33.7267	31.1923	32.5014	37.2847	33.1009	32.9691	38.338	42.3332	37.4016	35.4453	35.6739	32.8121	50.9864	44.5324	-0.195257	-1.08566	0.00255	0.0170322	yes
4632415L05Rik	chr3:19894870-19898984	WTLV	TGLV	OK	1.63778	1.3813	1.40619	1.45833	1.20442	1.08309	1.62663	1.3517	1.11265	1.26623	0.821192	1.36794	1.15334	0.994208	0.751378	0.849741	1.44617	1.75933	0.282789	0.835328	0.0185	0.0806919	no
Cp	chr3:19956984-20035380	WTLV	TGLV	OK	16.2103	15.4568	15.5639	16.6024	13.9025	16.8998	12.2255	15.4281	16.366	16.4618	21.4934	16.4907	15.2631	16.774	19.9974	16.9937	22.9998	18.6495	-0.302486	-1.6551	5e-05	0.000553274	yes
Hps3	chr3:19956984-20035380	WTLV	TGLV	OK	1.80496	1.9642	3.13496	1.38664	1.227	1.35494	1.62551	1.57179	1.43616	1.30977	1.17653	1.25094	1.5469	1.62749	1.81067	0.890555	2.15369	2.46389	0.194132	0.240469	0.4817	0.710566	no
Hltf	chr3:20057806-20118491	WTLV	TGLV	OK	2.61995	1.8094	1.51934	2.23907	2.67715	2.34561	1.95018	1.97577	2.33472	2.36631	2.02963	2.15135	2.31648	2.5528	2.08977	2.21047	3.72309	3.07693	-0.275006	-1.02924	0.0036	0.0223423	yes
Gyg	chr3:20122083-20155266	WTLV	TGLV	OK	25.9204	26.451	23.6658	25.223	26.2224	24.6969	24.8531	24.9593	24.8788	25.1825	27.5964	21.2039	23.6185	24.2714	23.4707	23.6893	31.4615	30.3748	-0.0507095	-0.268786	0.4421	0.679964	no
Gm31552	chr3:20816384-20822361	WTLV	TGLV	OK	0.584086	0.976289	0.410946	0	0.328415	0.558571	0.223264	0.237014	0.63792	2.25154	0.367638	0.498413	0.560892	0.641682	0.336383	0.694678	1.50606	0.736643	-1.03174	-1.0424	0.0069	0.0377696	yes
Tbl1xr1	chr3:22076591-22216594	WTLV	TGLV	OK	4.80966	4.12614	4.27227	4.812	4.42889	4.36449	4.36068	4.26035	4.39981	4.50612	4.29318	3.65328	4.2538	4.5462	5.08296	4.01233	5.75041	5.41731	-0.0860888	-0.43659	0.21235	0.443405	no
Nceh1	chr3:27183003-27245266	WTLV	TGLV	OK	23.5005	24.3539	24.0896	24.3063	24.531	23.4821	24.0495	24.9037	21.38	22.1216	23.0617	22.4717	23.9517	22.5264	21.0727	22.6483	28.7894	28.7381	-0.00257767	-0.0157946	0.96555	0.984781	no
Tnfsf10	chr3:27317076-27339665	WTLV	TGLV	OK	1.79307	1.87557	1.13588	1.84377	1.73826	1.4191	1.05041	1.43569	1.29055	1.61838	1.58552	1.40696	1.27985	1.79252	1.74087	1.72948	2.07878	1.88642	-0.140086	-0.480732	0.17485	0.392244	no
Fndc3b	chr3:27416160-27713112	WTLV	TGLV	OK	5.57766	5.66925	5.01477	6.33442	6.64519	5.72847	5.57806	6.28302	5.24469	4.73871	5.37165	5.26042	4.99816	5.65596	6.16826	5.08561	7.19941	7.25187	0.0104757	0.0551371	0.8745	0.944099	no
Pld1	chr3:27938406-28133362	WTLV	TGLV	OK	1.69431	1.40325	1.02568	1.2754	1.41696	1.49004	1.4932	1.20581	1.20336	0.811212	0.845916	0.901679	1.27953	1.30516	0.960782	0.950906	1.6511	1.89944	0.202145	0.662611	0.0574	0.184306	no
Tnik	chr3:28263213-28672457	WTLV	TGLV	OK	5.84027	5.20851	4.20105	5.02767	5.40222	4.95274	5.2882	4.57897	4.74091	3.94254	4.42214	5.96624	5.95452	5.34036	5.68139	4.01925	7.25501	6.75107	-0.103863	-0.49311	0.16205	0.373517	no
Rpl22l1	chr3:28805443-28807424	WTLV	TGLV	OK	17.6691	11.4883	10.2522	11.2577	12.2349	13.5004	11.7848	13.5791	11.9578	13.5435	10.0343	15.784	14.7786	13.5886	12.3003	10.9911	18.8977	16.9097	-0.160366	-0.437272	0.2193	0.45217	no
Mecom	chr3:29951295-30509783	WTLV	TGLV	OK	2.25506	2.50583	2.71393	2.26159	3.31743	2.3758	2.46901	2.80922	2.33371	2.40139	2.79535	3.27844	2.9498	2.74403	2.92519	2.91883	3.95618	3.30779	-0.258242	-0.906294	0.00905	0.0466866	yes
Mynn	chr3:30602086-30619873	WTLV	TGLV	OK	2.04888	2.23454	2.03991	1.66812	1.84554	2.16228	2.1799	1.8102	1.71186	1.14628	1.26169	1.53833	2.02926	1.70611	1.53682	1.34459	2.09166	2.47854	0.244841	0.911899	0.0093	0.0476232	yes
Sec62	chr3:30792764-30821263	WTLV	TGLV	OK	22.7572	18.722	18.8717	20.1509	22.5938	22.7923	21.2187	22.3625	18.8433	20.6175	18.8935	18.7472	20.6574	19.1904	19.105	19.2692	25.4619	25.7049	0.0137004	0.0745993	0.83615	0.927496	no
Phc3	chr3:30899294-30969479	WTLV	TGLV	OK	3.35997	4.17755	3.94722	3.53134	4.00949	3.95781	4.58623	3.65531	2.89856	3.51264	3.33707	3.78548	3.61964	4.27396	3.25848	4.06595	4.99882	4.9392	-0.0173088	-0.0559111	0.874	0.944099	no
Prkci	chr3:30995741-31052740	WTLV	TGLV	OK	2.71967	1.44103	2.13187	1.59046	2.07213	2.73778	2.09661	2.00521	1.51186	1.59882	2.66831	1.65661	1.93725	2.11381	1.91061	2.34693	2.77479	2.83492	0.0309305	0.103693	0.77095	0.892762	no
Skil	chr3:31094803-31122923	WTLV	TGLV	OK	3.86032	3.24708	3.9126	3.77876	4.55476	3.70993	4.72902	3.382	2.78565	2.73137	3.13304	2.82673	3.03064	3.67141	3.06413	3.10942	3.98165	4.6914	0.236651	1.11338	0.00155	0.011374	yes
Zmat3	chr3:32334791-32367438	WTLV	TGLV	OK	0.824194	0.70149	0.724915	1.10699	0.94766	0.83714	0.770478	0.890635	0.600652	0.621093	0.891127	0.724108	0.709667	0.618195	0.740958	0.714898	0.924519	1.03864	0.167917	0.520038	0.13955	0.339012	no
Pik3ca	chr3:32397068-32502896	WTLV	TGLV	OK	7.32564	7.43509	6.7321	7.37401	7.77845	7.51456	7.51925	8.25778	6.48841	7.61782	6.82049	7.28812	6.71799	7.32331	6.76999	6.80319	9.29915	9.19295	-0.0165715	-0.0917478	0.79635	0.905276	no
Zfp639	chr3:32510549-32520833	WTLV	TGLV	OK	4.22808	3.29893	3.07466	3.9896	5.41128	3.69961	3.8627	5.33367	3.20954	4.05127	3.31117	4.52918	4.24851	4.71593	3.97968	5.03559	5.6419	5.12104	-0.139745	-0.457318	0.19435	0.42121	no
Mfn1	chr3:32529462-32579225	WTLV	TGLV	OK	86.0653	77.1177	76.8574	74.2647	77.362	78.95	83.3842	76.1245	71.3463	72.2864	68.9898	74.318	73.4275	75.6343	71.9141	68.6422	93.2654	94.098	0.012822	0.0833769	0.812	0.914341	no
Gnb4	chr3:32580331-32616535	WTLV	TGLV	OK	2.13475	1.79248	1.10369	2.34411	1.67769	1.71301	1.98869	1.39893	1.61045	1.73781	1.20903	1.44135	1.70084	1.72267	1.13935	1.91836	2.27171	2.24529	-0.0168786	-0.0453408	0.89915	0.957274	no
Actl6a	chr3:32708545-32726973	WTLV	TGLV	OK	4.96181	5.34206	5.59813	4.66853	7.59565	5.98976	5.14506	5.67993	4.90448	5.91624	5.81818	5.14676	5.31188	6.20584	5.88682	5.73826	8.39418	7.5057	-0.161402	-0.634401	0.07035	0.21294	no
Mrpl47	chr3:32727496-32736755	WTLV	TGLV	OK	10.6037	10.9306	8.09926	7.7346	9.66341	9.62878	12.2712	8.88196	8.7123	10.625	10.9196	10.9472	8.59448	8.63899	7.56346	7.66518	13.4754	12.5712	-0.100204	-0.333539	0.34255	0.586485	no
Ndufb5	chr3:32737062-32751559	WTLV	TGLV	OK	231.843	213.694	215.245	187.037	210.649	201.974	205.956	229.642	209.214	212.422	222.468	213.194	248.428	205.687	225.279	207.336	280.978	252.714	-0.152946	-0.8916	0.01325	0.063327	no
Usp13	chr3:32817016-32938075	WTLV	TGLV	OK	43.227	39.1466	37.4932	44.7506	40.8057	41.0872	41.1506	41.5229	34.2696	34.3112	34.9434	34.7148	36.4869	37.1955	36.9115	35.473	46.124	49.5005	0.101925	0.638526	0.0692	0.210689	no
Ttc14	chr3:33800021-33844325	WTLV	TGLV	OK	2.98877	3.23379	2.05539	2.85325	3.26373	3.46196	2.97834	2.12733	2.18467	2.07534	2.90297	2.3218	2.81639	2.51606	2.10478	3.09633	3.52232	3.77755	0.100924	0.28128	0.4208	0.660778	no
Fxr1	chr3:34020057-34081354	WTLV	TGLV	OK	70.7232	60.5624	54.6213	58.0064	61.5716	62.4464	65.4947	61.197	58.5516	56.3488	60.0084	58.0935	61.8769	66.2789	57.9074	63.0018	79.4485	76.0095	-0.0638404	-0.370385	0.29305	0.53794	no
Dnajc19	chr3:34020057-34081354	WTLV	TGLV	OK	15.963	14.3325	16.4991	14.0176	15.9998	13.7746	18.8546	16.8405	17.3914	18.1081	17.0448	18.4867	18.1672	13.6473	14.3175	13.3887	49.1576	44.192	-0.153631	-0.313433	0.3734	0.616978	no
Atp11b	chr3:35754061-35856276	WTLV	TGLV	OK	4.3305	5.23501	4.49373	5.08479	4.6533	4.51513	6.23445	4.10927	3.61135	3.70244	3.28963	3.73234	5.20256	4.3051	5.09397	4.01301	6.10571	6.333	0.0527305	0.215119	0.5428	0.753594	no
Dcun1d1	chr3:35892104-35955642	WTLV	TGLV	OK	5.10727	3.40991	4.25363	3.74864	3.85002	4.93699	4.78332	4.81636	3.5706	3.63913	3.31711	3.3686	3.59571	3.60674	3.61561	3.01373	7.54208	8.69501	0.205226	0.867961	0.0123	0.0597032	no
Mccc1	chr3:35956291-36053547	WTLV	TGLV	OK	22.2978	21.7956	21.4909	19.4364	23.0968	21.5952	23.573	22.1029	23.8299	22.8805	20.64	22.3994	24.4193	23.2484	20.744	22.4691	28.5966	25.7966	-0.148664	-0.841481	0.01795	0.0790214	no
Acad9	chr3:36065983-36092857	WTLV	TGLV	OK	5.1685	4.28207	3.97243	4.58036	4.59884	4.61304	4.94984	4.32736	5.02433	5.39925	5.27792	5.77834	4.61709	5.72204	5.37549	5.67484	8.02553	6.30811	-0.34739	-1.5169	5e-05	0.000553274	yes
D3Ertd254e	chr3:36151079-36170341	WTLV	TGLV	OK	1.42162	0.783004	1.19081	1.09618	1.30379	1.07929	0.93705	1.2168	0.953784	0.742489	0.983367	0.856581	1.07302	0.827916	1.17067	0.898366	1.2432	1.36065	0.130241	0.42649	0.2224	0.455986	no
Gm42208	chr3:36272523-36278964	WTLV	TGLV	OK	2.21503	0.914145	1.73156	0.743061	4.84341	3.76581	3.52786	1.99739	2.15039	2.89888	2.32365	0.525037	1.41802	3.15447	2.12611	3.65893	3.14497	3.04956	-0.0444454	-0.0536325	0.87125	0.943688	no
Gm42209	chr3:36354217-36406508	WTLV	TGLV	OK	0.954086	1.18129	0.745853	1.76039	1.04311	0.912407	2.27935	1.61314	1.21569	1.02162	0.166812	1.3569	1.6797	1.01905	0.915785	2.20643	1.95522	1.59995	-0.289309	-0.332696	0.3341	0.579408	no
Anxa5	chr3:36448922-36475887	WTLV	TGLV	OK	28.2574	17.9305	23.1444	21.1568	27.2027	21.4546	20.907	29.3176	20.0134	21.0427	22.951	18.6325	22.2016	21.5974	20.4244	20.3683	27.6753	28.7997	0.0574536	0.29955	0.39685	0.640328	no
Exosc9	chr3:36552605-36573025	WTLV	TGLV	OK	8.91405	6.22392	6.43979	6.52573	7.01686	6.66414	8.70944	6.99559	7.91556	7.02736	7.25882	6.16233	7.661	6.10658	4.83791	8.51938	8.94782	8.09661	-0.144219	-0.485742	0.165	0.37818	no
Ccna2	chr3:36552605-36573025	WTLV	TGLV	OK	0.235677	0.126616	0.256213	0.708858	0.547867	0.541723	0.312539	0.361305	0.398872	0.467764	0.569764	0.14785	0.354145	0.255194	0.181085	0.42943	1.02644	1.04003	0.0189702	0.0250598	0.9454	0.9762	no
Bbs7	chr3:36573141-36613492	WTLV	TGLV	OK	0.870235	1.23741	0.854956	1.47794	0.670934	1.07277	0.975311	1.21388	0.742511	0.6927	0.713194	0.689497	1.09685	1.09547	0.949686	1.13202	1.40088	1.57743	0.171244	0.403711	0.2482	0.486086	no
Trpc3	chr3:36620481-36690220	WTLV	TGLV	OK	2.27637	1.52474	1.64097	1.38963	1.91202	2.12341	2.35364	2.55537	1.78059	1.43852	1.80079	1.45288	1.5051	1.52479	1.55815	1.36849	2.13439	2.41239	0.17664	0.557453	0.11535	0.300479	no
4932438A13Rik	chr3:36863061-37053033	WTLV	TGLV	OK	4.2707	5.23297	5.02886	4.85376	4.77749	4.82281	4.78254	4.90998	4.58694	4.17929	5.07418	4.63122	4.67655	5.23119	4.79756	4.37188	6.43208	6.18775	-0.0558713	-0.326242	0.3568	0.600283	no
Fgf2	chr3:37333288-37404893	WTLV	TGLV	OK	1.32227	0.870264	0.699324	0.85744	1.92266	1.51742	1.19685	1.20726	0.838783	0.364906	2.81854	1.69041	1.76777	0.637774	1.37399	0.524312	1.77522	1.66702	-0.09072	-0.0989215	0.78065	0.899108	no
Nudt6	chr3:37404981-37602389	WTLV	TGLV	OK	12.3572	8.4398	13.014	12.7297	11.5498	12.3307	11.8475	12.497	13.3762	19.3769	10.6376	10.0769	12.3966	20.0995	11.8598	10.061	19.0943	14.8873	-0.359065	-0.909043	0.00865	0.0449762	yes
Spata5	chr3:37404981-37602389	WTLV	TGLV	OK	1.71723	1.48232	1.53029	1.80129	1.72258	1.78099	1.18116	2.52722	1.81852	1.26901	1.53646	1.66908	1.74503	2.38089	2.09762	1.51922	2.51902	2.31661	-0.120844	-0.246991	0.475	0.706231	no
Spry1	chr3:37639946-37644599	WTLV	TGLV	OK	6.21035	4.28608	4.42474	4.88083	5.78513	4.91522	6.33407	6.46868	5.47985	5.6069	5.47948	5.77515	6.82653	5.86798	6.15277	4.47715	7.32321	6.44828	-0.183561	-0.724401	0.0387	0.139866	no
Ankrd50	chr3:38449260-38484860	WTLV	TGLV	OK	5.21632	3.65035	4.68153	4.35659	4.6739	5.01291	4.20768	4.861	4.22654	4.49726	4.1181	4.68663	4.80454	4.5264	4.88233	3.85496	5.74103	5.47041	-0.069659	-0.355533	0.3141	0.559393	no
Fat4	chr3:38880582-39011987	WTLV	TGLV	OK	1.16344	1.49123	1.34939	1.63222	1.64627	1.2493	1.08004	1.57926	1.16785	1.21465	1.33653	1.29334	1.24699	1.21103	1.67857	1.13253	1.67304	1.70947	0.0310848	0.145487	0.67825	0.841977	no
Intu	chr3:40531290-40704776	WTLV	TGLV	OK	1.99704	2.6369	1.84318	2.70086	2.12537	2.12506	3.01046	2.28556	2.57498	3.13889	2.90455	3.26615	3.27336	3.27178	2.92113	3.19688	4.65564	3.42254	-0.443915	-2.03219	5e-05	0.000553274	yes
Hspa4l	chr3:40744403-40796103	WTLV	TGLV	OK	10.4361	9.37627	8.6953	9.76787	11.4411	8.38455	11.1279	8.80194	8.90505	9.45658	10.2428	10.539	9.72175	9.31297	8.79094	9.79194	12.8306	12.1455	-0.0791628	-0.384681	0.2741	0.516871	no
Mfsd8	chr3:40818102-40846856	WTLV	TGLV	OK	1.86415	2.14745	1.6613	1.49514	1.6874	2.3621	1.87403	1.15386	1.85225	1.82689	1.29547	2.47235	1.51562	1.71072	1.50382	1.91829	2.52288	2.26326	-0.156671	-0.367153	0.27565	0.517977	no
Abhd18	chr3:40846998-40937736	WTLV	TGLV	OK	13.1213	12.6656	9.58198	10.2431	8.66204	12.1108	10.5759	7.12264	8.77537	8.25098	8.45438	7.82888	7.52189	9.00615	8.69505	8.93444	11.0831	12.5343	0.177527	0.840965	0.0162	0.0733371	no
Larp1b	chr3:40948690-41040207	WTLV	TGLV	OK	27.1124	20.926	25.7256	21.0394	26.4953	24.6574	25.0764	25.4282	24.0817	20.2106	25.0566	25.5743	26.0082	24.8085	22.6477	24.129	36.9688	34.3208	-0.107225	-0.540866	0.12215	0.311672	no
Pgrmc2	chr3:41066325-41083046	WTLV	TGLV	OK	6.36478	5.60835	5.96532	6.75635	7.57542	7.33075	7.48076	7.04597	6.49475	6.86503	6.92059	7.63144	7.85195	6.10347	5.75253	6.79173	8.74538	8.10876	-0.109039	-0.49693	0.15865	0.368698	no
Jade1	chr3:41555733-41616864	WTLV	TGLV	OK	7.32773	6.98412	6.51938	5.17032	7.53715	6.53059	6.65121	6.73239	5.37605	5.12193	5.26679	6.52297	5.9218	6.25531	6.47682	5.43391	7.6034	8.05186	0.0826781	0.427149	0.2312	0.465826	no
Sclt1	chr3:41626704-41742532	WTLV	TGLV	OK	4.04552	2.43637	4.40372	3.70155	3.37498	3.97336	3.02524	2.90652	2.44986	2.21536	3.95289	3.07927	3.04335	2.91002	2.61352	3.38947	4.39255	4.73907	0.109544	0.36639	0.30025	0.544315	no
D3Ertd751e	chr3:41742605-41803292	WTLV	TGLV	OK	6.41646	5.06301	4.61907	3.72407	5.482	4.75514	4.54023	4.21914	3.7628	3.72958	3.47761	4.90943	4.75098	4.68466	4.97021	3.78415	5.84709	6.11168	0.063849	0.214834	0.5225	0.741387	no
Pcdh18	chr3:49743290-49757382	WTLV	TGLV	OK	0.879044	0.730997	0.727647	0.739441	1.67213	1.14177	1.16601	1.03816	0.859758	0.85697	1.10108	0.965623	1.05832	1.045	0.881528	0.689194	1.22037	1.21659	-0.00448255	-0.0131344	0.9716	0.987291	no
Noct	chr3:51224446-51251654	WTLV	TGLV	OK	7.84945	9.95986	4.7683	7.66464	5.89057	7.08605	13.8943	4.55547	4.96206	3.82972	3.83459	3.35125	6.15123	4.84988	3.37319	4.59281	5.63503	9.19155	0.705884	2.63154	5e-05	0.000553274	yes
Elf2	chr3:51252719-51340920	WTLV	TGLV	OK	9.2836	9.17158	7.3097	8.28739	9.04959	9.5769	10.7605	8.04206	7.7165	8.84765	7.6059	7.60898	9.37605	9.5255	7.36288	8.48595	10.6882	10.5921	-0.013041	-0.0624021	0.8574	0.935799	no
4930577N17Rik	chr3:51252719-51340920	WTLV	TGLV	OK	1.29354	1.11641	0.309206	0.591972	1.16564	1.36828	0.415124	0.874666	0.774693	0.461699	0.709614	0.633886	0.703622	0.40116	0.639111	0.849209	1.19689	1.29473	0.113359	0.103014	0.7668	0.890455	no
Ndufc1	chr3:51405478-51408955	WTLV	TGLV	OK	414.764	331.149	314.619	312.762	342.837	341.621	357.542	333.364	310.508	376.251	364.415	373.815	378.201	352.113	323.393	325.387	575.17	526.149	-0.128517	-0.784848	0.02635	0.105623	no
Naa15	chr3:51416015-51475985	WTLV	TGLV	OK	8.23282	8.33345	8.16174	7.26112	9.29133	7.39697	8.40669	8.71111	7.51718	7.39367	8.54368	7.53041	8.44914	8.49961	7.57305	7.84164	10.4043	10.1594	-0.0343617	-0.189878	0.5929	0.787936	no
Rab33b	chr3:51483965-51496228	WTLV	TGLV	OK	1.63747	1.38794	1.54909	1.48216	1.27434	1.58222	1.53017	1.8755	2.01816	1.4707	1.7827	1.44619	1.56936	2.36373	2.33846	1.83594	2.38157	1.84968	-0.364637	-1.11598	0.0021	0.0145951	yes
Setd7	chr3:51515317-51567117	WTLV	TGLV	OK	7.76854	7.02782	6.39697	8.37871	8.31274	7.50756	8.12868	7.70536	7.34068	6.7971	8.70364	6.84861	8.97305	8.03765	7.63151	7.64538	10.0584	9.11111	-0.142709	-0.808111	0.02115	0.0892556	no
Maml3	chr3:51687319-52105086	WTLV	TGLV	OK	0.53823	0.536773	0.428476	0.284696	0.928624	0.730308	0.611572	0.661453	0.721511	0.950544	0.710773	0.535327	0.783074	0.869271	0.941557	0.715853	1.01205	0.704001	-0.523626	-1.42244	0.0001	0.00103854	yes
Foxo1	chr3:52268336-52350109	WTLV	TGLV	OK	2.46004	2.44272	1.99929	2.52487	2.56784	2.30599	1.88534	3.06393	2.14144	2.06039	2.63179	2.42916	2.51439	2.16299	2.56001	2.49854	3.08423	2.91205	-0.0828755	-0.338967	0.33115	0.576479	no
Cog6	chr3:52982122-53017223	WTLV	TGLV	OK	23.9967	17.7421	17.6255	18.0589	17.7925	19.4638	20.4804	18.653	17.2279	16.5312	15.5417	17.8227	17.749	17.5797	16.9126	16.418	22.936	24.0163	0.0664026	0.372549	0.2947	0.539964	no
Lhfp	chr3:53041546-53261679	WTLV	TGLV	OK	14.227	10.4214	13.079	12.6502	17.0861	12.5487	12.7045	13.6971	10.56	10.8339	10.1067	12.0812	11.6061	11.3177	9.47953	9.85673	13.8847	15.8603	0.191931	0.911128	0.00985	0.049921	yes
Nhlrc3	chr3:53451995-53463258	WTLV	TGLV	OK	0.623815	0.356477	1.01284	1.25564	0.584589	1.28491	0.641982	0.778877	1.15299	0.866819	1.00678	0.972498	0.737283	1.04712	0.73695	1.28411	1.41538	1.13982	-0.312386	-0.514009	0.15485	0.36322	no
Proser1	chr3:53463816-53481755	WTLV	TGLV	OK	1.66092	1.46889	1.6694	1.44871	2.09013	1.4976	1.63255	1.60471	1.3821	1.42279	1.55984	1.65352	1.61016	1.40473	1.51833	1.37965	2.03832	2.09733	0.0411671	0.136969	0.7008	0.854439	no
Frem2	chr3:53513937-53657355	WTLV	TGLV	OK	0.478404	0.268986	0.333418	0.424728	0.35188	0.381325	0.329026	0.358162	0.883236	0.97563	1.21878	1.06868	1.04999	1.17955	1.22444	0.989311	1.40036	0.456787	-1.6162	-4.87238	5e-05	0.000553274	yes
Gm30735	chr3:53703041-53735763	WTLV	TGLV	OK	0.561535	0.43401	0.31932	0.393885	0.409852	0.397299	0.537807	0.316092	0.390273	0.792838	0.94434	0.738973	0.960475	0.475434	0.842544	0.861084	1.0045	0.523478	-0.940284	-1.87448	5e-05	0.000553274	yes
Ufm1	chr3:53853375-53863807	WTLV	TGLV	OK	3.33807	2.71064	2.53855	3.40168	2.70933	3.09875	3.12317	2.83376	2.74574	2.63214	2.75452	2.78587	2.81655	2.94094	2.70803	2.60244	3.67006	3.718	0.0187228	0.078299	0.82	0.918105	no
Postn	chr3:54359271-54391041	WTLV	TGLV	OK	15.1872	8.96822	12.2669	23.4229	28.7489	13.4757	15.1443	20.7096	6.48244	5.02885	7.64749	6.24234	7.77455	6.49376	10.4412	7.25588	10.023	20.7259	1.04812	5.29604	5e-05	0.000553274	yes
Supt20	chr3:54692759-54735364	WTLV	TGLV	OK	2.2228	1.99003	2.11335	2.3834	2.14232	2.15586	2.8122	1.83981	1.6556	2.27726	1.68171	2.03758	2.41243	2.33531	2.14268	1.95902	3.34699	3.42026	0.031243	0.0937441	0.77445	0.8955	no
Exosc8	chr3:54692759-54735364	WTLV	TGLV	OK	4.02726	2.88976	3.30478	3.48177	2.95243	3.79297	2.27412	2.72367	2.39512	3.39757	3.16023	3.05904	3.98452	3.29589	3.15117	3.95696	4.89572	4.31991	-0.180522	-0.369254	0.2997	0.543742	no
Alg5	chr3:54735538-54749795	WTLV	TGLV	OK	2.46489	1.9551	2.89038	3.10091	2.50239	2.30811	2.64992	1.45865	1.90689	1.97952	2.90899	2.95783	1.9232	2.91481	1.57729	2.54479	3.90055	3.57798	-0.124533	-0.331164	0.34905	0.593576	no
Rfxap	chr3:54803114-54807791	WTLV	TGLV	OK	2.99207	2.68582	4.3662	2.91091	3.6451	4.13307	3.87589	3.87849	3.55831	4.165	3.90606	2.69504	3.5756	4.9611	3.6378	3.52564	4.86642	4.28925	-0.182135	-0.612747	0.08095	0.23458	no
Spg20	chr3:55112073-55137332	WTLV	TGLV	OK	9.76553	7.76386	8.92544	8.14456	10.3372	8.93296	10.1294	10.0406	8.63164	7.91996	8.02213	7.61041	8.0014	7.90057	9.24006	8.42821	10.8881	11.1408	0.0330942	0.168419	0.63615	0.815446	no
Nbea	chr3:55625194-56184266	WTLV	TGLV	OK	2.27004	2.42097	2.28	2.24834	2.45317	3.03722	2.43812	2.37429	2.3048	1.93746	3.11958	2.37867	2.67789	3.16533	3.21608	2.44661	3.74755	3.2773	-0.193443	-0.746758	0.03335	0.125796	no
Tm4sf1	chr3:57287063-57301983	WTLV	TGLV	OK	18.9419	10.694	15.2634	13.6894	18.3241	14.829	12.4801	19.5865	11.9806	13.0337	12.775	12.8937	12.5122	10.2308	15.5943	11.8967	16.8219	18.7068	0.153223	0.686897	0.05165	0.171524	no
Wwtr1	chr3:57455643-57575910	WTLV	TGLV	OK	12.9938	10.6692	10.0795	11.5489	12.4184	10.8095	10.3635	11.6993	9.15323	9.64894	10.46	8.72544	9.02474	10.0798	10.547	10.2015	12.6142	13.5421	0.102398	0.564218	0.11215	0.294609	no
Commd2	chr3:57644348-57651684	WTLV	TGLV	OK	0.838385	0.614047	0.609249	0.760582	0.575417	0.598497	0.586774	0.503119	0.386897	0.632201	0.854724	0.780907	0.873127	0.767547	0.838731	1.0299	1.09241	0.838563	-0.381519	-0.789846	0.02615	0.105035	no
Rnf13	chr3:57736043-57835425	WTLV	TGLV	OK	23.4224	19.9951	20.1049	21.7378	25.1325	22.6709	20.3887	24.4035	21.1417	25.5552	21.9265	21.6316	24.9944	21.8224	22.2087	20.5061	31.8402	28.0026	-0.185288	-0.802867	0.0253	0.102456	no
Pfn2	chr3:57841894-57847757	WTLV	TGLV	OK	7.99283	6.45693	7.7334	7.86381	8.26276	8.87762	6.54202	7.05397	5.1281	6.86987	5.828	8.02856	6.78053	7.15342	6.055	5.64831	8.50474	9.17982	0.110198	0.450839	0.19645	0.423589	no
Gm32753	chr3:57949107-58031713	WTLV	TGLV	OK	1.64464	0.339419	0.214331	0.684507	1.54632	1.56151	2.97184	0.728309	0.0783347	1.17635	0.934685	0.781267	0.869552	0.335043	1.38981	0.90148	1.3949	1.58172	0.181329	0.142366	0.674	0.839325	no
Tsc22d2	chr3:58415535-58466787	WTLV	TGLV	OK	4.81191	3.81261	4.69993	3.78377	5.13409	4.5636	4.31621	4.80576	4.04591	4.12672	4.42782	4.991	4.83036	4.44611	2.87725	4.19544	5.45842	5.38828	-0.0186589	-0.0586434	0.8746	0.944099	no
Serp1	chr3:58521968-58557501	WTLV	TGLV	OK	3.82438	4.38534	5.26594	4.37381	4.66993	4.73788	5.34352	4.61449	2.65801	4.56042	4.89334	4.17199	4.11766	4.08479	4.47733	3.61812	5.29286	5.63859	0.0912858	0.23845	0.4954	0.722486	no
Eif2a	chr3:58521968-58557501	WTLV	TGLV	OK	6.90532	4.80801	5.46267	6.29013	7.16927	6.23846	7.08454	6.72024	5.16343	6.87471	6.33426	5.7436	8.05248	7.35545	6.09422	7.45796	9.222	8.47114	-0.122523	-0.391984	0.26255	0.501987	no
Selt	chr3:58576657-58593544	WTLV	TGLV	OK	24.4175	18.8534	20.8908	17.8711	24.2698	21.2981	23.4082	22.7677	20.1597	20.7699	20.5855	21.0119	23.0144	23.6566	19.3103	20.9595	32.5378	30.7271	-0.082607	-0.498667	0.1523	0.359305	no
Siah2	chr3:58674948-58692439	WTLV	TGLV	OK	3.1639	1.40291	2.24084	2.03676	2.4815	2.5579	3.85386	2.51108	1.35043	1.28189	1.42311	1.64179	1.31384	1.59457	1.23117	0.9961	1.75576	3.03613	0.790141	2.07325	5e-05	0.000553274	yes
Med12l	chr3:59005593-59344441	WTLV	TGLV	OK	0.636737	0.770414	0.644407	0.510229	0.836145	0.921376	0.725294	0.685157	0.698824	0.734677	0.870365	0.851476	0.638964	1.00452	0.90301	0.842975	1.22155	1.03298	-0.2419	-0.667738	0.0516	0.171406	no
P2ry14	chr3:59005593-59344441	WTLV	TGLV	OK	0.761679	1.4228	0.447094	0.786194	1.29999	1.01249	1.01073	1.24462	0.89793	1.18348	1.15691	1.17292	0.731592	1.49143	1.63501	0.944335	1.50388	1.20933	-0.314476	-0.337952	0.2947	0.539964	no
Igsf10	chr3:59005593-59344441	WTLV	TGLV	OK	0.864778	0.455387	0.586832	0.993706	1.0536	0.818725	0.761214	1.02034	0.378257	0.58201	0.529488	0.550337	0.494814	0.414503	0.519464	0.529546	0.624438	0.920018	0.559103	1.04225	0.00395	0.0241221	yes
Mbnl1	chr3:60472787-60629750	WTLV	TGLV	OK	27.2521	23.7333	26.0394	23.9556	26.5341	26.6546	25.1175	25.9123	22.7688	23.9441	23.5336	21.3904	23.7663	24.931	24.7149	23.198	30.3783	30.7204	0.0161515	0.0990734	0.78075	0.899108	no
P2ry1	chr3:61002784-61008982	WTLV	TGLV	OK	4.34278	3.28776	3.99745	3.43899	3.85141	4.03203	3.59505	3.90704	3.55684	3.99513	3.75798	2.80337	4.31587	3.31276	3.44456	4.32216	4.75851	4.5444	-0.0664198	-0.270258	0.44305	0.680717	no
Rap2b	chr3:61364506-61368703	WTLV	TGLV	OK	0.897013	1.07528	0.841484	1.01767	1.37554	1.15417	0.763686	1.0258	0.587813	0.855721	0.78702	0.852422	0.579482	1.04519	0.673148	0.986033	1.02922	1.2089	0.232141	0.603492	0.0908	0.254038	no
Dhx36	chr3:62468014-62507032	WTLV	TGLV	OK	3.59073	3.08485	3.23343	2.67878	3.20415	3.71957	3.49113	4.00664	3.24079	3.12702	3.05382	3.5424	3.71463	3.33374	3.46066	3.93311	4.92097	4.47199	-0.138027	-0.617684	0.0798	0.232329	no
Mme	chr3:63295223-63383713	WTLV	TGLV	OK	1.52167	1.59304	1.52263	1.23097	1.3275	1.98307	1.80499	1.61233	1.10019	1.11694	1.4074	1.41488	1.03913	1.29685	1.37488	0.998373	1.92194	2.1054	0.131532	0.42591	0.2292	0.463533	no
Gm34302	chr3:63481103-63483906	WTLV	TGLV	OK	45.051	41.9639	54.6813	23.0675	22.2788	42.3271	81.9913	64.9458	52.436	44.5159	66.9758	45.8325	57.774	45.2018	18.9657	28.9839	66.5103	63.0908	-0.0761469	-0.21216	0.55235	0.762042	no
E130311K13Rik	chr3:63914681-63929385	WTLV	TGLV	OK	3.27118	2.39518	1.7691	4.01812	3.0062	3.35094	2.37424	3.19428	3.24229	2.91824	3.67585	1.92069	2.99099	2.89606	3.13912	2.80057	3.91963	3.86689	-0.0195413	-0.0539309	0.8787	0.946126	no
Slc33a1	chr3:63942322-63964733	WTLV	TGLV	OK	1.92948	1.63265	2.19402	1.73616	1.83493	1.64828	1.33455	1.13211	1.75611	1.83984	1.71774	2.02713	1.31937	1.98185	1.04996	2.08669	2.32614	2.19983	-0.0805432	-0.221515	0.529	0.744857	no
Gmps	chr3:63964818-64021497	WTLV	TGLV	OK	9.61417	6.74102	8.03923	7.21231	7.72768	7.08054	6.49836	7.61187	5.2139	6.06611	6.09658	6.37593	7.45034	6.64784	6.17254	5.74603	8.4469	9.40698	0.155311	0.777024	0.0294	0.114701	no
Ssr3	chr3:65379656-65392553	WTLV	TGLV	OK	35.2626	26.5432	26.7405	25.688	30.7694	29.4952	30.5644	28.3076	24.6141	21.9997	25.0179	26.5518	23.9974	25.4352	24.5927	22.7941	31.5199	34.779	0.141952	0.836492	0.01625	0.0735072	no
Tiparp	chr3:65527482-65555518	WTLV	TGLV	OK	2.79672	2.66272	2.2426	2.06767	3.30146	2.31274	2.65179	2.90347	1.02636	1.80265	1.99163	1.78614	2.09693	1.75109	1.95541	1.67864	2.34193	3.25627	0.475521	1.67376	5e-05	0.000553274	yes
Lekr1	chr3:65659538-65832480	WTLV	TGLV	OK	0.496949	0.927408	1.19974	0.347721	0.385559	0.713794	0.392746	0.604007	0.633334	0.602715	0.85156	0.952923	0.717511	0.495193	0.512755	0.53729	0.998392	0.899127	-0.151082	-0.265979	0.4416	0.679725	no
Ccnl1	chr3:65945907-65958394	WTLV	TGLV	OK	3.93777	4.39134	4.54396	3.73384	4.12965	4.00444	4.7379	3.8625	3.62183	3.67269	2.82153	3.18537	4.95654	4.04267	4.23856	4.00702	5.2195	5.26261	0.0118658	0.0387793	0.90675	0.960418	no
Rsrc1	chr3:66971722-67358403	WTLV	TGLV	OK	12.8691	9.44935	9.61713	6.557	9.78406	9.06982	9.15579	8.7392	11.9652	6.78184	5.46369	8.96255	7.88816	6.92615	7.04957	7.88074	12.7105	13.2174	0.0564186	0.1507	0.6637	0.832722	no
Mlf1	chr3:67374096-67400000	WTLV	TGLV	OK	98.7894	88.5671	75.5434	62.1693	78.5005	85.849	90.9488	71.8254	79.1184	74.8039	65.7285	77.0041	83.7259	85.0785	83.9061	72.236	100.729	97.8056	-0.0424839	-0.251749	0.4758	0.706859	no
Gfm1	chr3:67430114-67475068	WTLV	TGLV	OK	54.716	48.183	46.9409	43.9281	46.9175	46.5262	50.4423	49.5759	48.0271	49.2414	49.3542	50.5599	50.5062	53.1552	49.7264	50.3218	65.0096	58.2848	-0.157533	-0.980496	0.00605	0.0341764	yes
Lxn	chr3:67430114-67475068	WTLV	TGLV	OK	1.75744	1.01998	1.88907	3.61116	1.99004	1.68067	1.25958	1.33714	0.95971	1.33296	2.53498	1.56215	1.33606	1.87711	1.89775	1.66926	2.38835	2.6448	0.147143	0.0940034	0.79225	0.903452	no
Mfsd1	chr3:67582767-67604231	WTLV	TGLV	OK	3.4973	2.22319	2.58721	2.14966	2.99144	3.23229	2.6916	3.21453	2.66606	2.41278	2.68389	2.57873	2.18635	2.19184	2.5909	2.62876	3.64032	3.81512	0.0676631	0.240216	0.50025	0.726214	no
Schip1	chr3:67892219-68626482	WTLV	TGLV	OK	33.0848	28.4966	26.1334	25.8643	26.3322	34.951	29.4637	29.6475	32.564	29.7257	30.8106	35.1386	35.4374	30.1568	28.2828	29.1096	40.5612	35.317	-0.199738	-1.06254	0.00285	0.0185133	yes
Ift80	chr3:68892498-69004645	WTLV	TGLV	OK	0.852477	0.295605	0.432239	0.505845	0.910794	0.400586	0.416307	0.866962	0.439288	0.466553	0.560102	0.257192	0.370065	0.690339	0.330633	0.514822	0.761467	0.836146	0.134973	0.298001	0.38495	0.6273	no
Smc4	chr3:69004971-69034623	WTLV	TGLV	OK	4.84176	2.65301	3.64282	4.11399	3.79648	3.83814	3.77846	3.17543	3.24617	3.83003	4.12679	4.99033	4.09589	4.21244	3.83614	3.84458	5.63998	5.04469	-0.160926	-0.706018	0.0444	0.154382	no
Kpna4	chr3:69072220-69127092	WTLV	TGLV	OK	16.0487	13.0658	12.3148	13.2304	15.8886	12.7131	14.0466	13.2423	13.2873	13.8388	15.1095	13.1346	13.7957	13.8802	13.7007	13.469	18.2726	16.7868	-0.122352	-0.683071	0.05325	0.175117	no
Ppm1l	chr3:69316917-69560798	WTLV	TGLV	OK	7.36264	7.52326	6.81922	6.95387	8.2055	8.2038	7.59007	8.27258	7.36325	6.05236	6.29563	7.21009	7.47947	7.35847	6.56048	7.40855	9.01946	9.1249	0.016768	0.0779773	0.8217	0.918903	no
B3galnt1	chr3:69573918-69598960	WTLV	TGLV	OK	0.852328	0.468822	0.481016	1.0274	1.1242	0.844928	0.422154	0.44815	0.345163	0.506818	0.56273	0.302917	0.45452	0.375547	0.545179	0.218918	0.530953	0.872552	0.716658	1.12014	0.0014	0.0104417	yes
Nmd3	chr3:69722054-69749047	WTLV	TGLV	OK	7.54654	5.51169	6.21434	6.78432	6.15821	5.67619	5.14534	6.66647	4.12104	5.08447	6.09313	5.29098	5.53693	5.12346	5.57512	6.05084	8.07644	8.10949	0.00589085	0.0222669	0.94945	0.977462	no
[truncated: 10,068 more rows]

## Sheet: c
A listing of 2323 transcripts that significantly differed in expression by genotype.
[truncated: 2,324 more rows]

## Sheet: d
A listing of all 6834 identified proteins.
[truncated: 6,835 more rows]

[truncated: 13 more sheets: e, f, g, h, i, j, k, l, m, n, o, p, q]
